# Supplementary material for: Analysis of the Genetic Parameters for Dairy Linear Appraisal and Zoometric Traits: A Tool to Enhance the Applicability of Murciano-Granadina Goats Major Areas Evaluation System
Source: MDPI journal article supplement (doi:10.3390/ani13061114), 2023-03-21
Supplement: s1 [file s1]

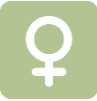

**Figure S1:** Graphical depictions of the scale for stature in Murciano-Granadina does for dairy purpose-related zoometric assessment.

*Stature*

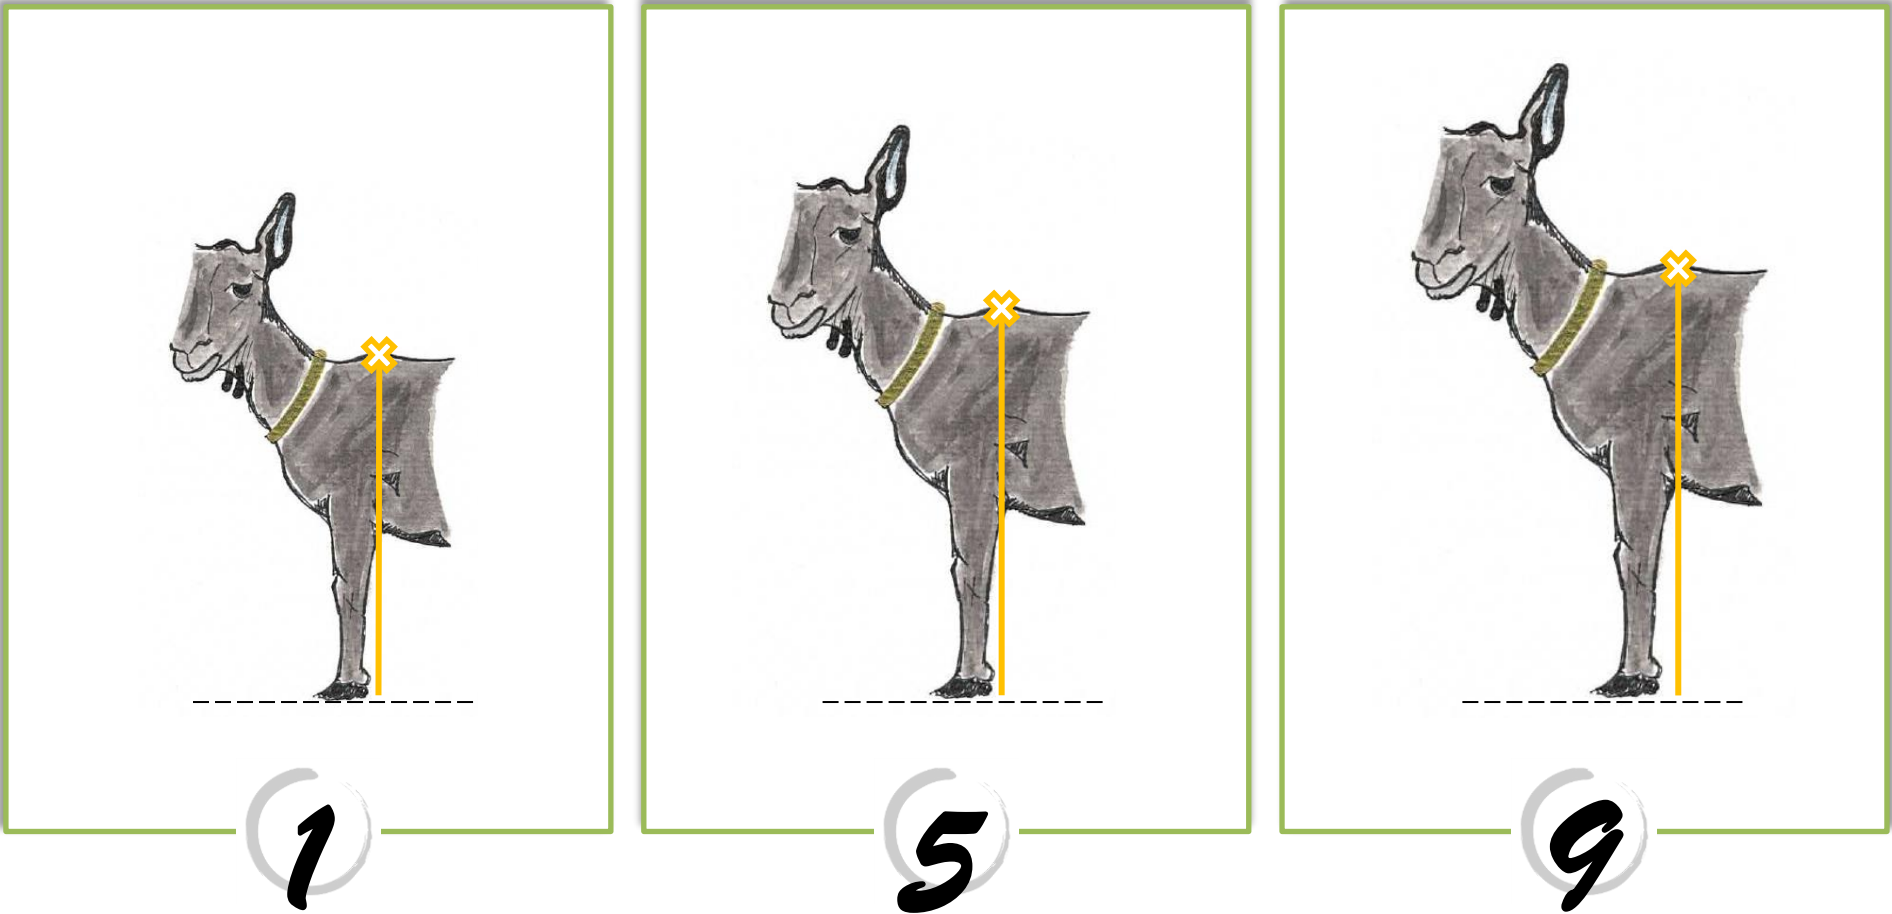

| Measure unit | Score |    |    |    |    |    |    |    |    |
|--------------|-------|----|----|----|----|----|----|----|----|
|              | 1     | 2  | 3  | 4  | 5  | 6  | 7  | 8  | 9  |
| cm           | 62    | 64 | 66 | 68 | 70 | 72 | 74 | 76 | 78 |

The scale translation from LAS scores to traditional zoometric measurements in centimeters, as well as optimal values following the premises described in the breed standard for both phenotype collection methods, are provided below the depictions.



**Figure S2:** Graphical depictions of the scale for chest width in Murciano-Granadina does for dairy purpose-related zoometric assessment.

*Chest width*

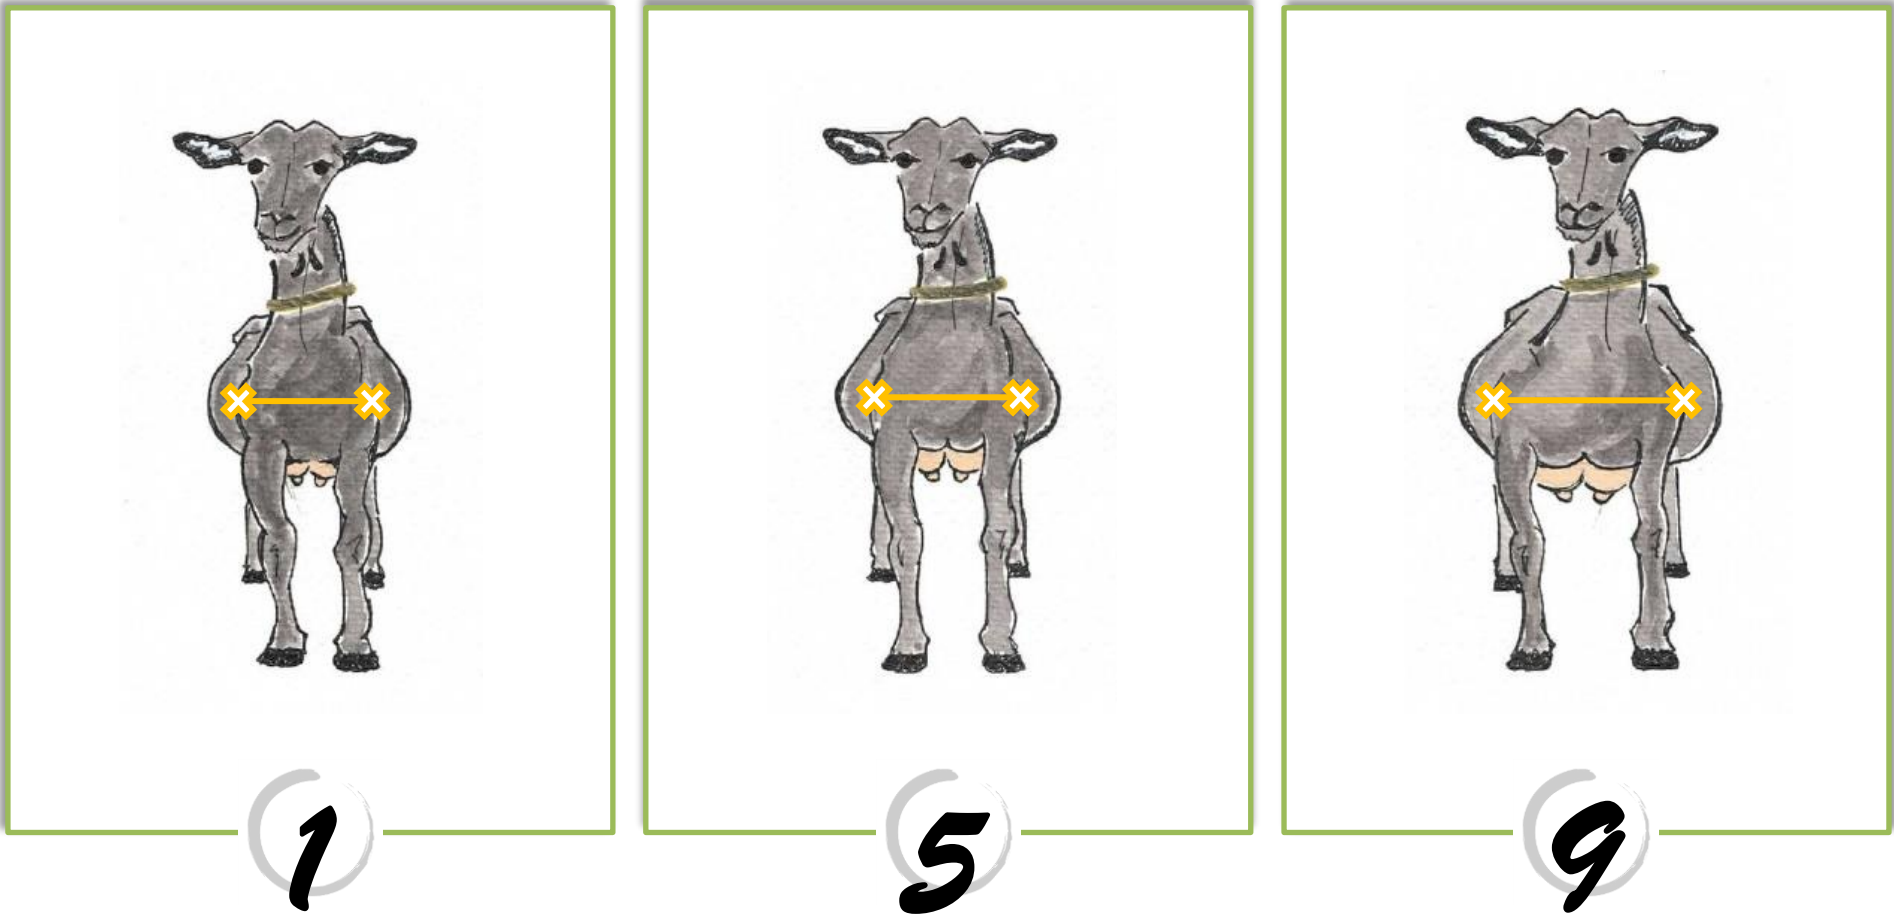

| Measure unit | Score |    |    |    |    |    |    |    |    |
|--------------|-------|----|----|----|----|----|----|----|----|
|              | 1     | 2  | 3  | 4  | 5  | 6  | 7  | 8  | 9  |
| cm           | 15    | 16 | 17 | 18 | 19 | 20 | 21 | 22 | 23 |

The scale translation from LAS scores to traditional zoometric measurements in centimeters, as well as optimal values following the premises described in the breed standard for both phenotype collection methods, are provided below the depictions.



**Figure S3:** Graphical depictions of the scale for body depth in Murciano-Granadina does for dairy purpose-related zoometric assessment.

*Body depth*

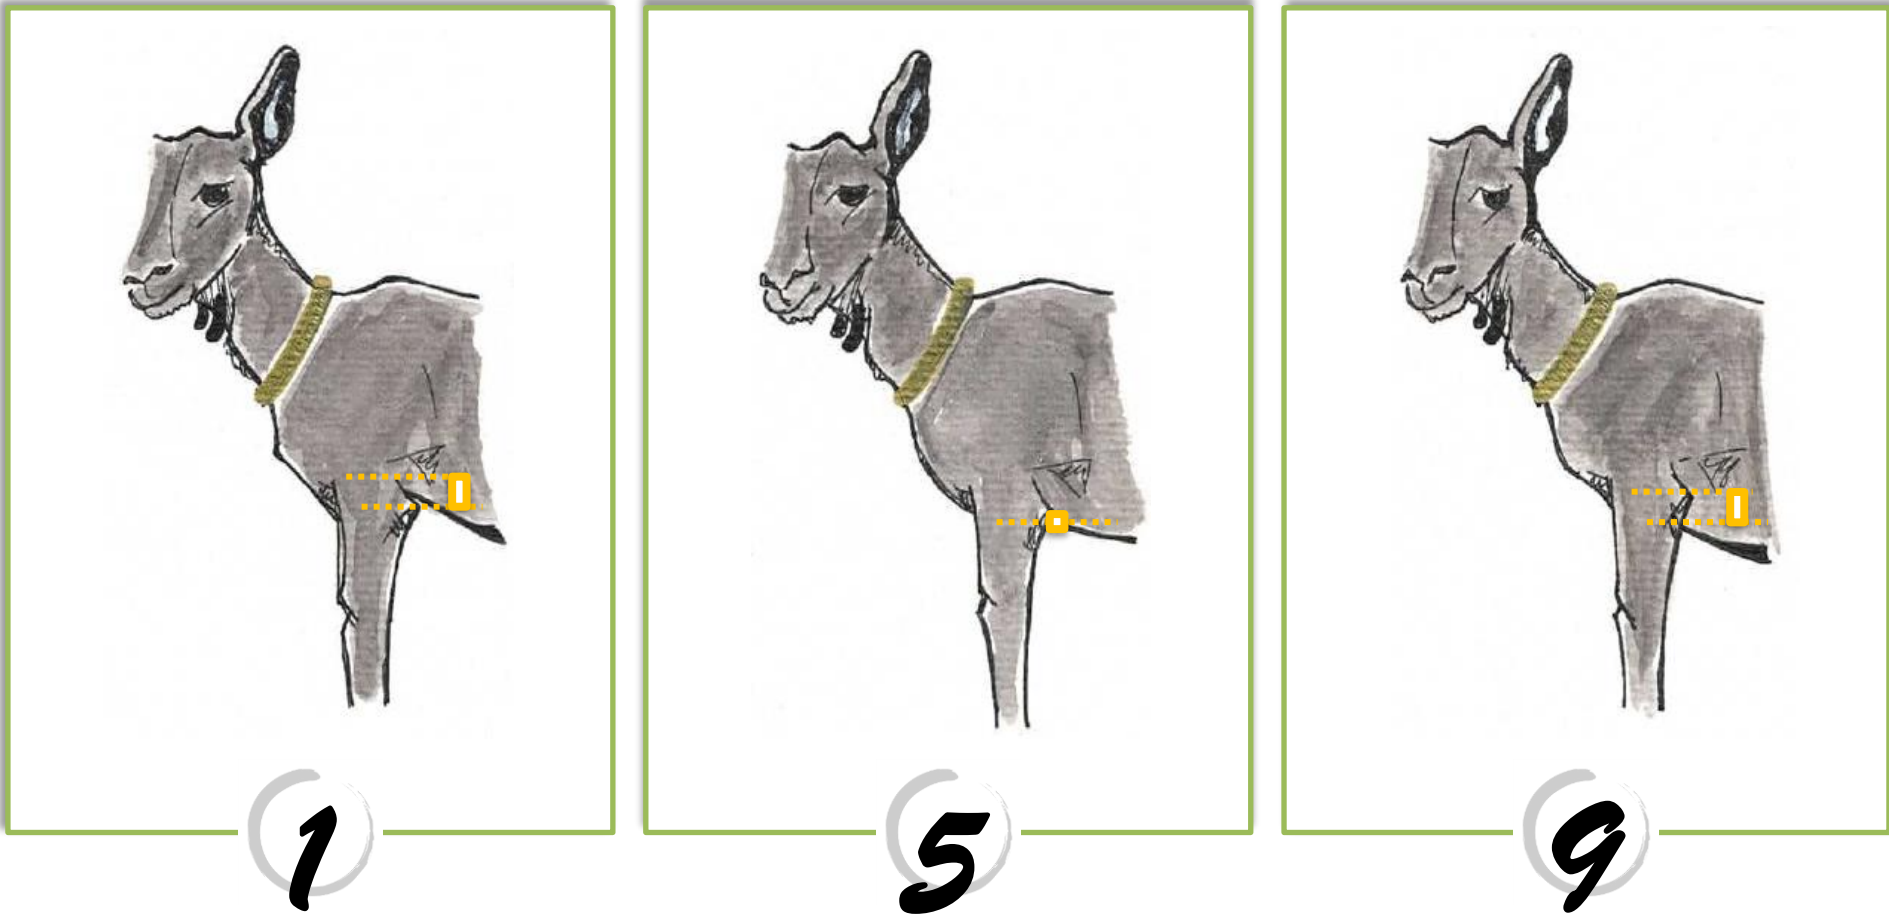

| Score   |              |                |
|---------|--------------|----------------|
| 1       | 5            | 9              |
| Shallow | Intermediate | Extremely deep |

The scale translation from LAS scores to traditional zoometric measurements in centimeters, as well as optimal values following the premises described in the breed standard for both phenotype collection methods, are provided below the depictions.



**Figure S4:** Graphical depictions of the scale for rump width in Murciano-Granadina does for dairy purpose-related zoometric assessment.

*Rump width*

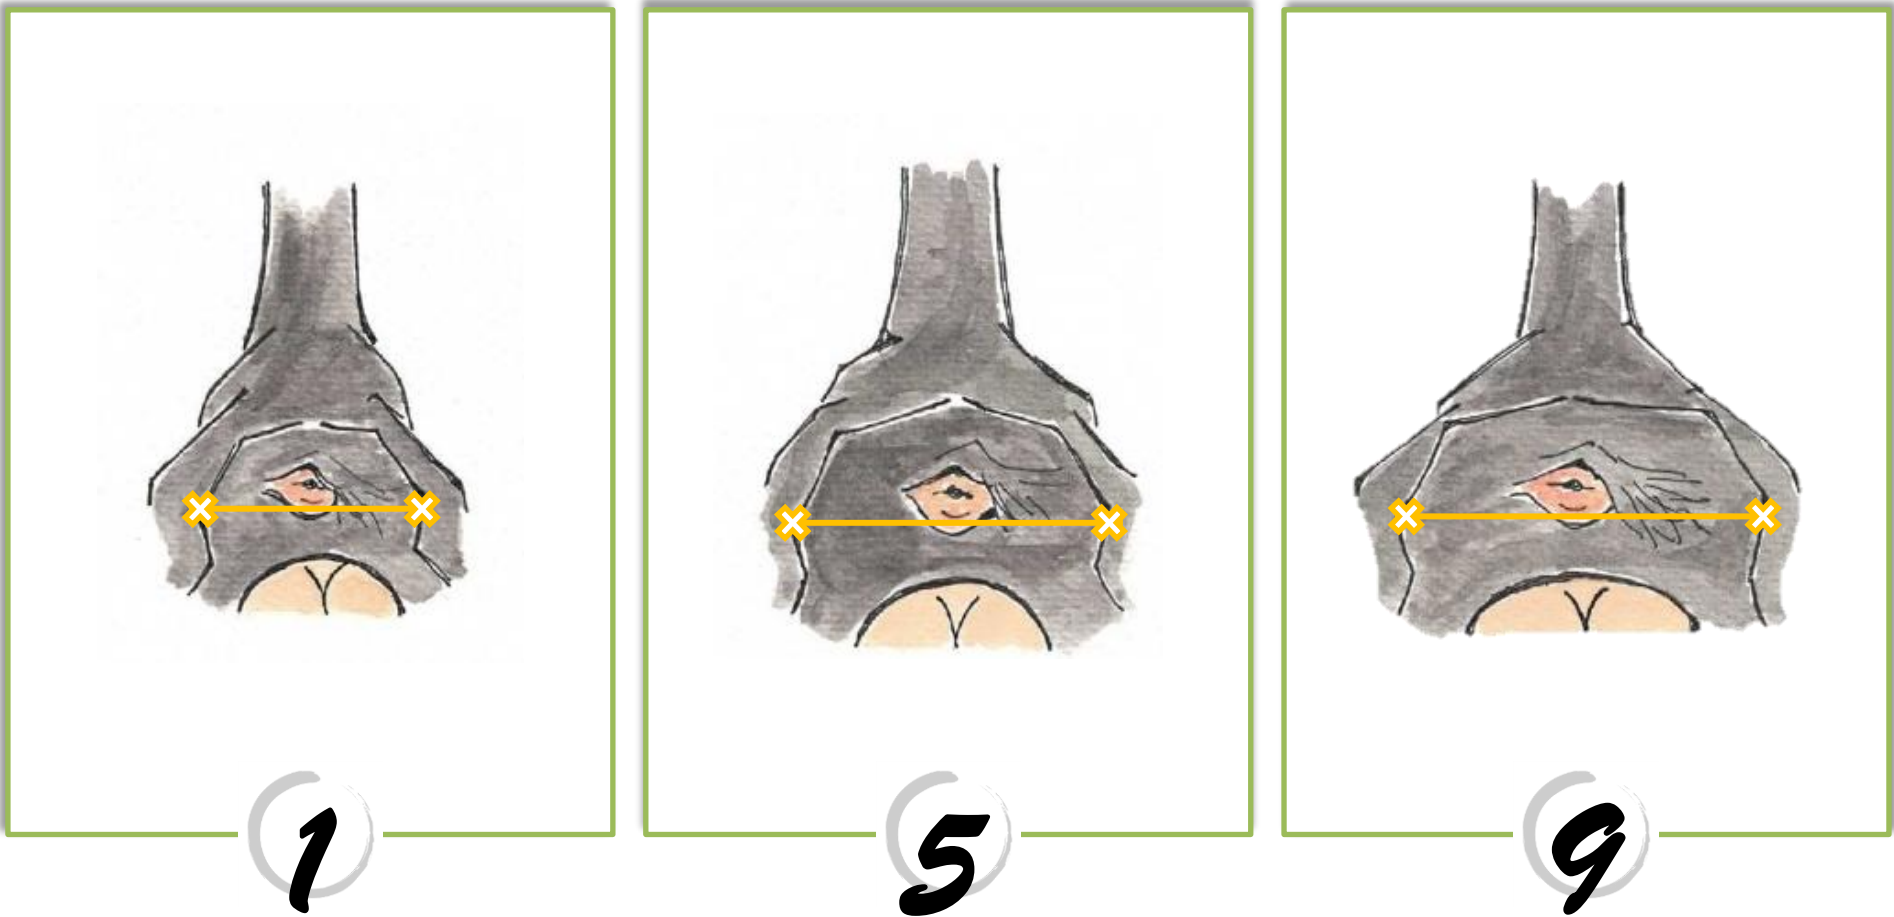

| Measure unit | Score |    |    |    |    |    |    |    |    |
|--------------|-------|----|----|----|----|----|----|----|----|
|              | 1     | 2  | 3  | 4  | 5  | 6  | 7  | 8  | 9  |
| cm           | 13    | 14 | 15 | 16 | 17 | 18 | 19 | 20 | 21 |

The scale translation from LAS scores to traditional zoometric measurements in centimeters, as well as optimal values following the premises described in the breed standard for both phenotype collection methods, are provided below the depictions.



**Figure S5:** Graphical depictions of the scale for rump angle in Murciano-Granadina does for dairy purpose-related zoometric assessment.

*Rump angle*

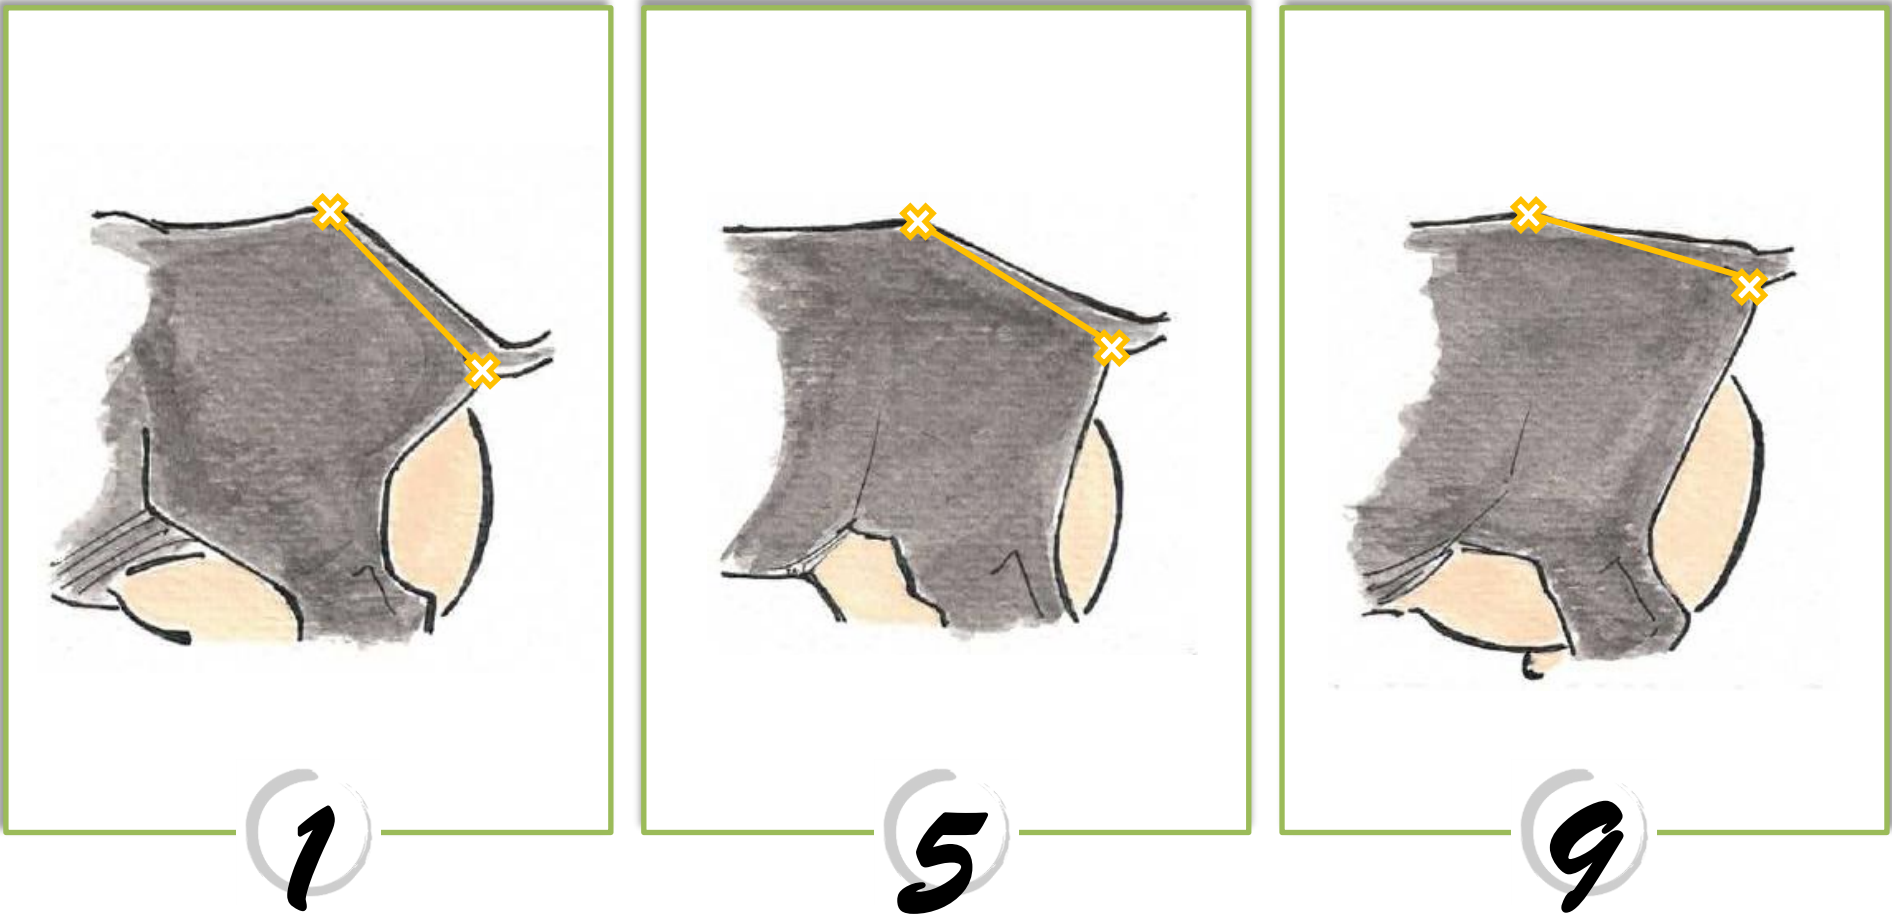

| Measure unit | Score |    |    |    |    |    |    |    |    |
|--------------|-------|----|----|----|----|----|----|----|----|
|              | 1     | 2  | 3  | 4  | 5  | 6  | 7  | 8  | 9  |
| cm           | 55    | 52 | 49 | 46 | 43 | 40 | 37 | 34 | 31 |

The scale translation from LAS scores to traditional zoometric measurements in centimeters, as well as optimal values following the premises described in the breed standard for both phenotype collection methods, are provided below the depictions.



**Figure S6:** Graphical depictions of the scale for angulosity in Murciano-Granadina does for dairy purpose-related zoometric assessment.

*Angulosity*

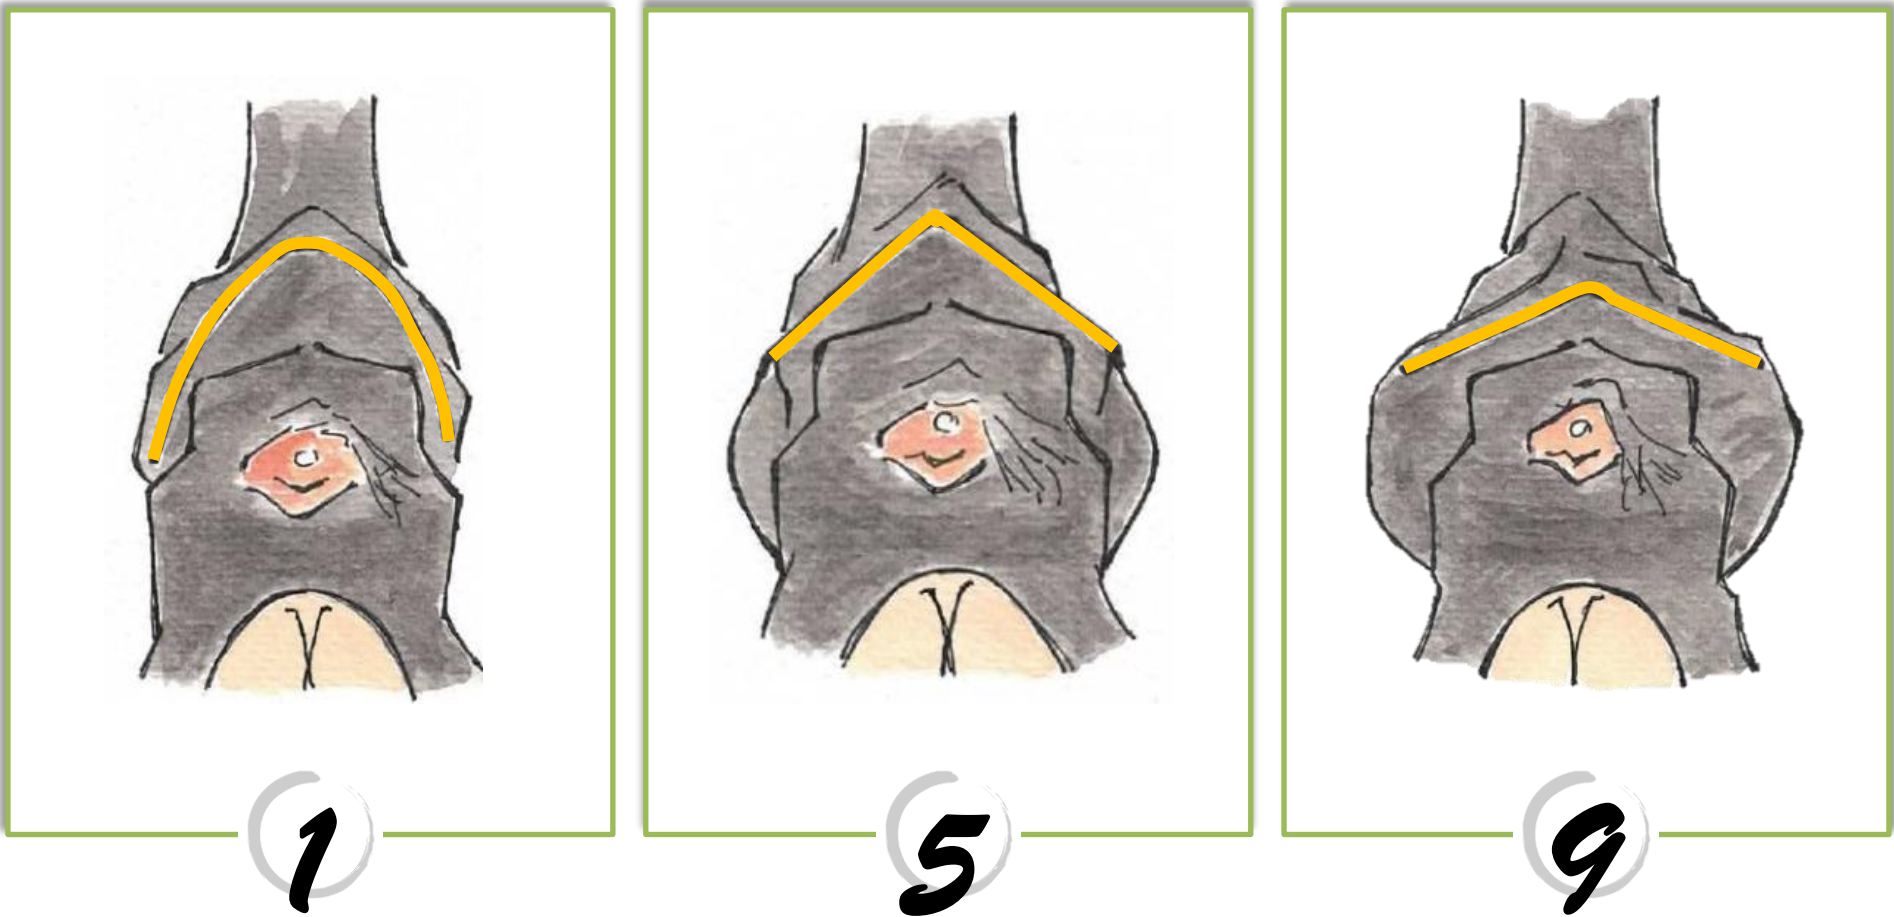

| Score           |              |                    |
|-----------------|--------------|--------------------|
| 1               | 5            | 9                  |
| Rough extremity | Intermediate | Angulous extremity |

The scale translation from LAS scores to traditional zoometric measurements in centimeters, as well as optimal values following the premises described in the breed standard for both phenotype collection methods, are provided below the depictions.





**Figure S7:** Graphical depictions of the scale for bone quality in Murciano-Granadina does for dairy purpose-related zoometric assessment.

*Bone quality*

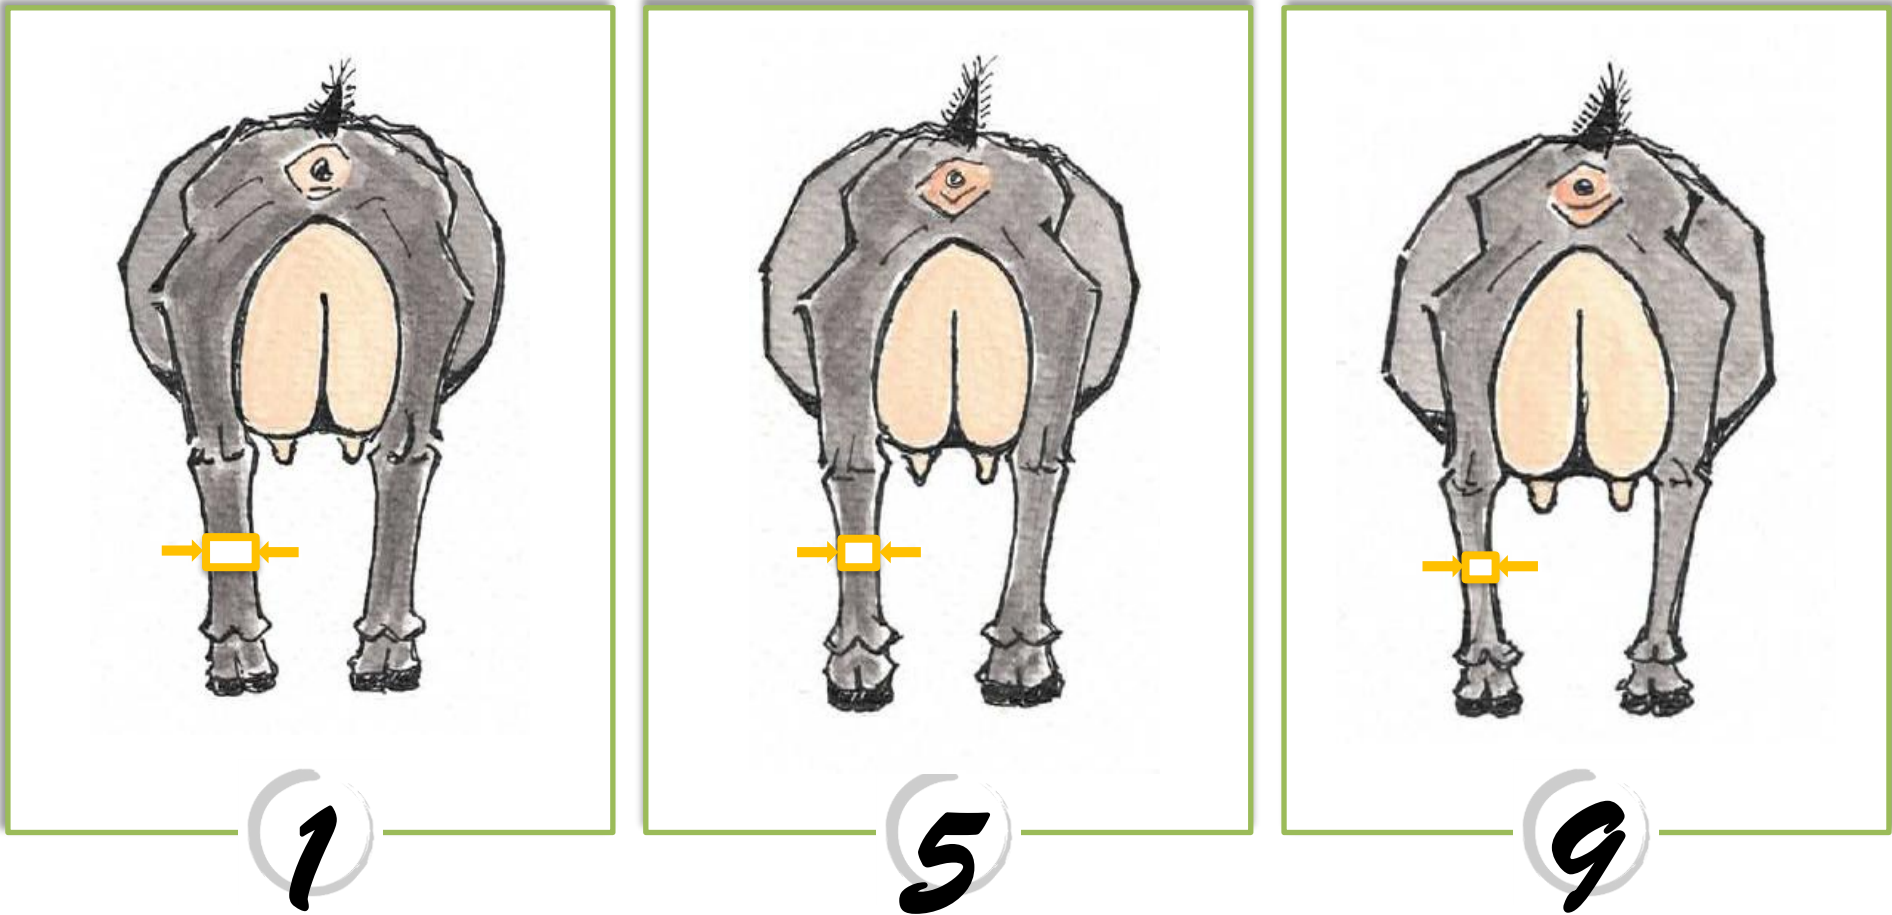

| Score                 |              |                     |
|-----------------------|--------------|---------------------|
| 1                     | 5            | 9                   |
| Round and rough bones | Intermediate | Flat and neat bones |

The scale translation from LAS scores to traditional zoometric measurements in centimeters, as well as optimal values following the premises described in the breed standard for both phenotype collection methods, are provided below the depictions.

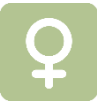

**Figure S8:** Graphical depictions of the scale for anterior insertion in Murciano-Granadina does for dairy purpose-related zoometric assessment.

*Anterior insertion*

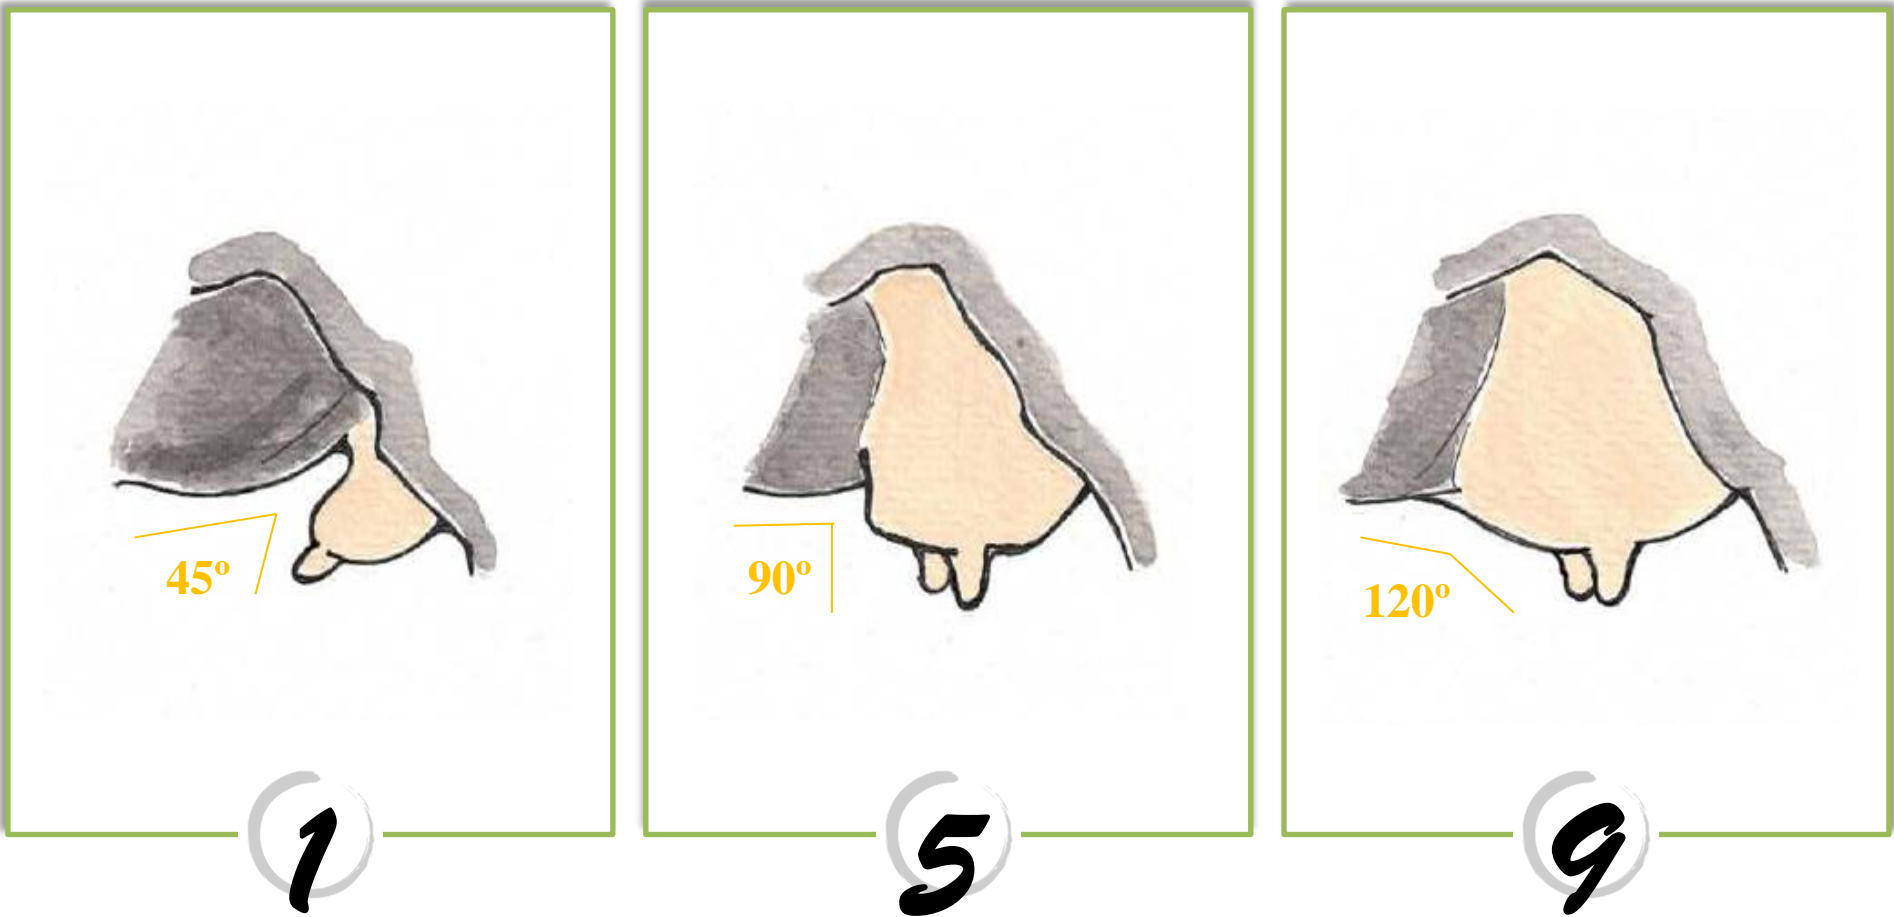

| Score |              |        |
|-------|--------------|--------|
| 1     | 5            | 9      |
| Weak  | Intermediate | Strong |

The scale translation from LAS scores to traditional zoometric measurements in centimeters, as well as optimal values following the premises described in the breed standard for both phenotype collection methods, are provided below the depictions.





**Figure S9:** Graphical depictions of the scale for rear insertion height in Murciano-Granadina does for dairy purpose-related zoometric assessment.

*Rear insertion height*

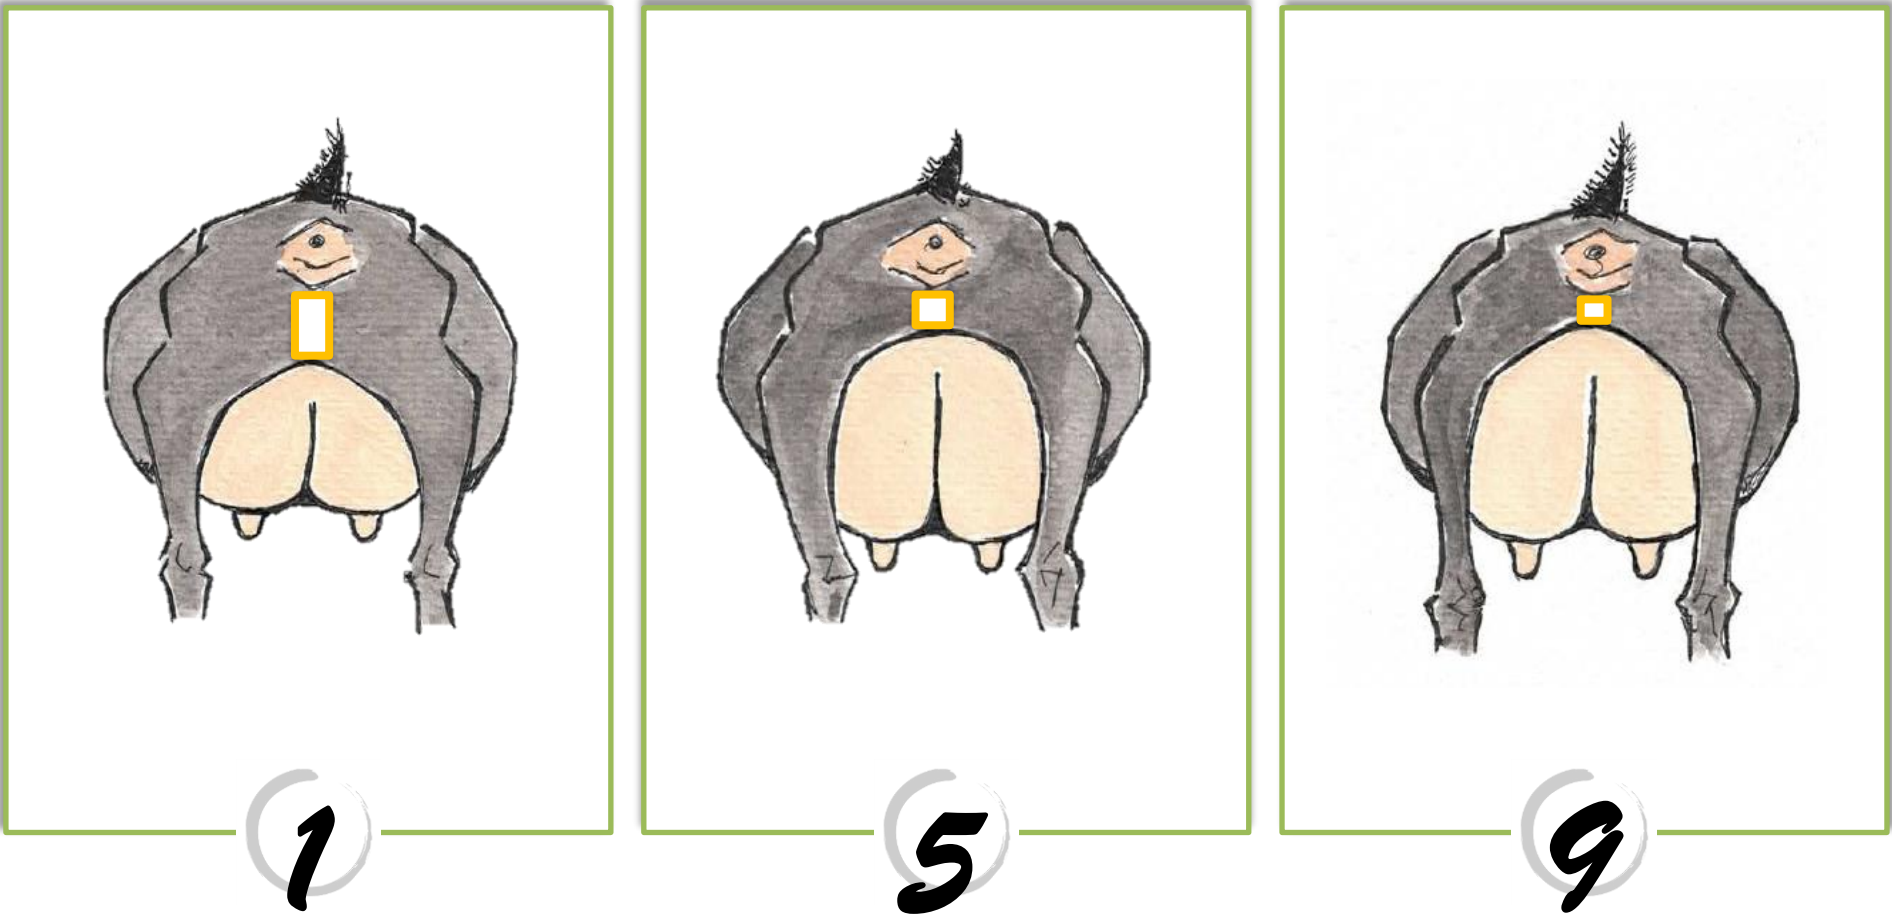

| Measure unit | Score |    |   |   |   |   |   |   |   |
|--------------|-------|----|---|---|---|---|---|---|---|
|              | 1     | 2  | 3 | 4 | 5 | 6 | 7 | 8 | 9 |
| cm           | 11    | 10 | 9 | 8 | 7 | 6 | 5 | 4 | 3 |

The scale translation from LAS scores to traditional zoometric measurements in centimeters, as well as optimal values following the premises described in the breed standard for both phenotype collection methods, are provided below the depictions.

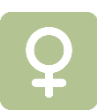

**Figure S10:** Graphical depictions of the scale for median suspensor ligament in Murciano-Granadina does for dairy purpose-related zoometric assessment.

*Median suspensor ligament*

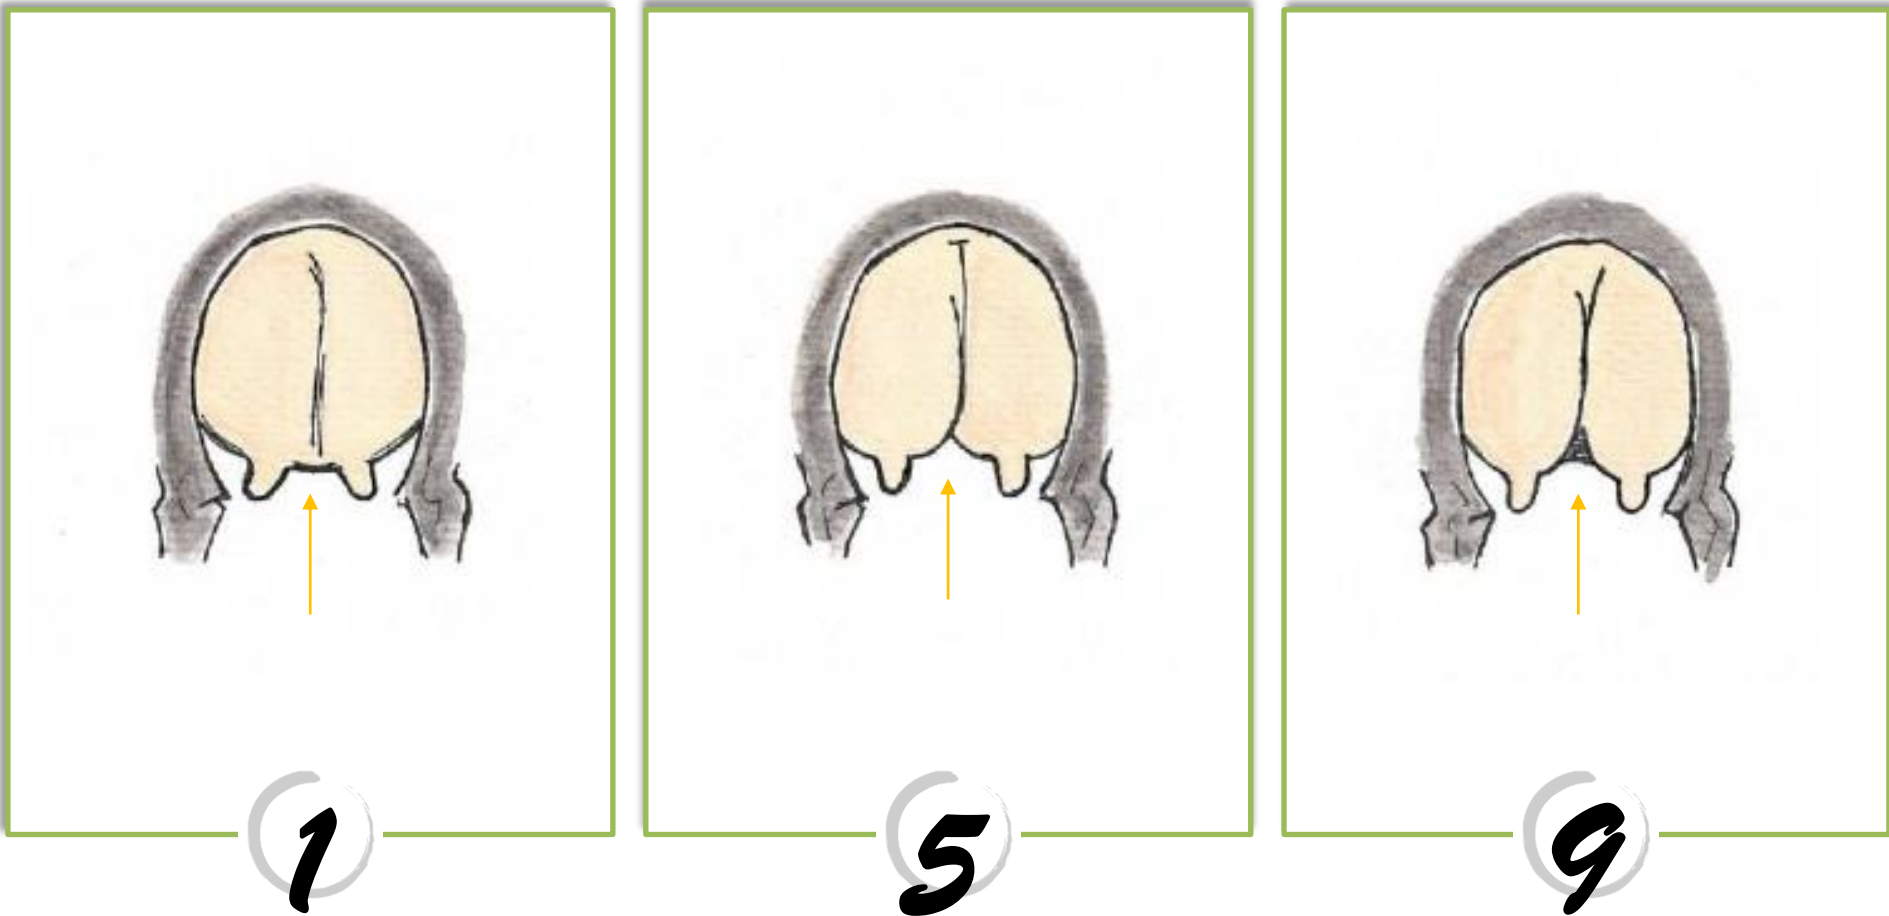

| Measure unit | Score |   |   |   |   |   |   |   |   |
|--------------|-------|---|---|---|---|---|---|---|---|
|              | 1     | 2 | 3 | 4 | 5 | 6 | 7 | 8 | 9 |
| cm           | 1     | 2 | 3 | 4 | 5 | 6 | 7 | 8 | 9 |

The scale translation from LAS scores to traditional zoometric measurements in centimeters, as well as optimal values following the premises described in the breed standard for both phenotype collection methods, are provided below the depictions.



**Figure S11:** Graphical depictions of the scale for udder width in Murciano-Granadina does for dairy purpose-related zoometric assessment.

*Udder width*

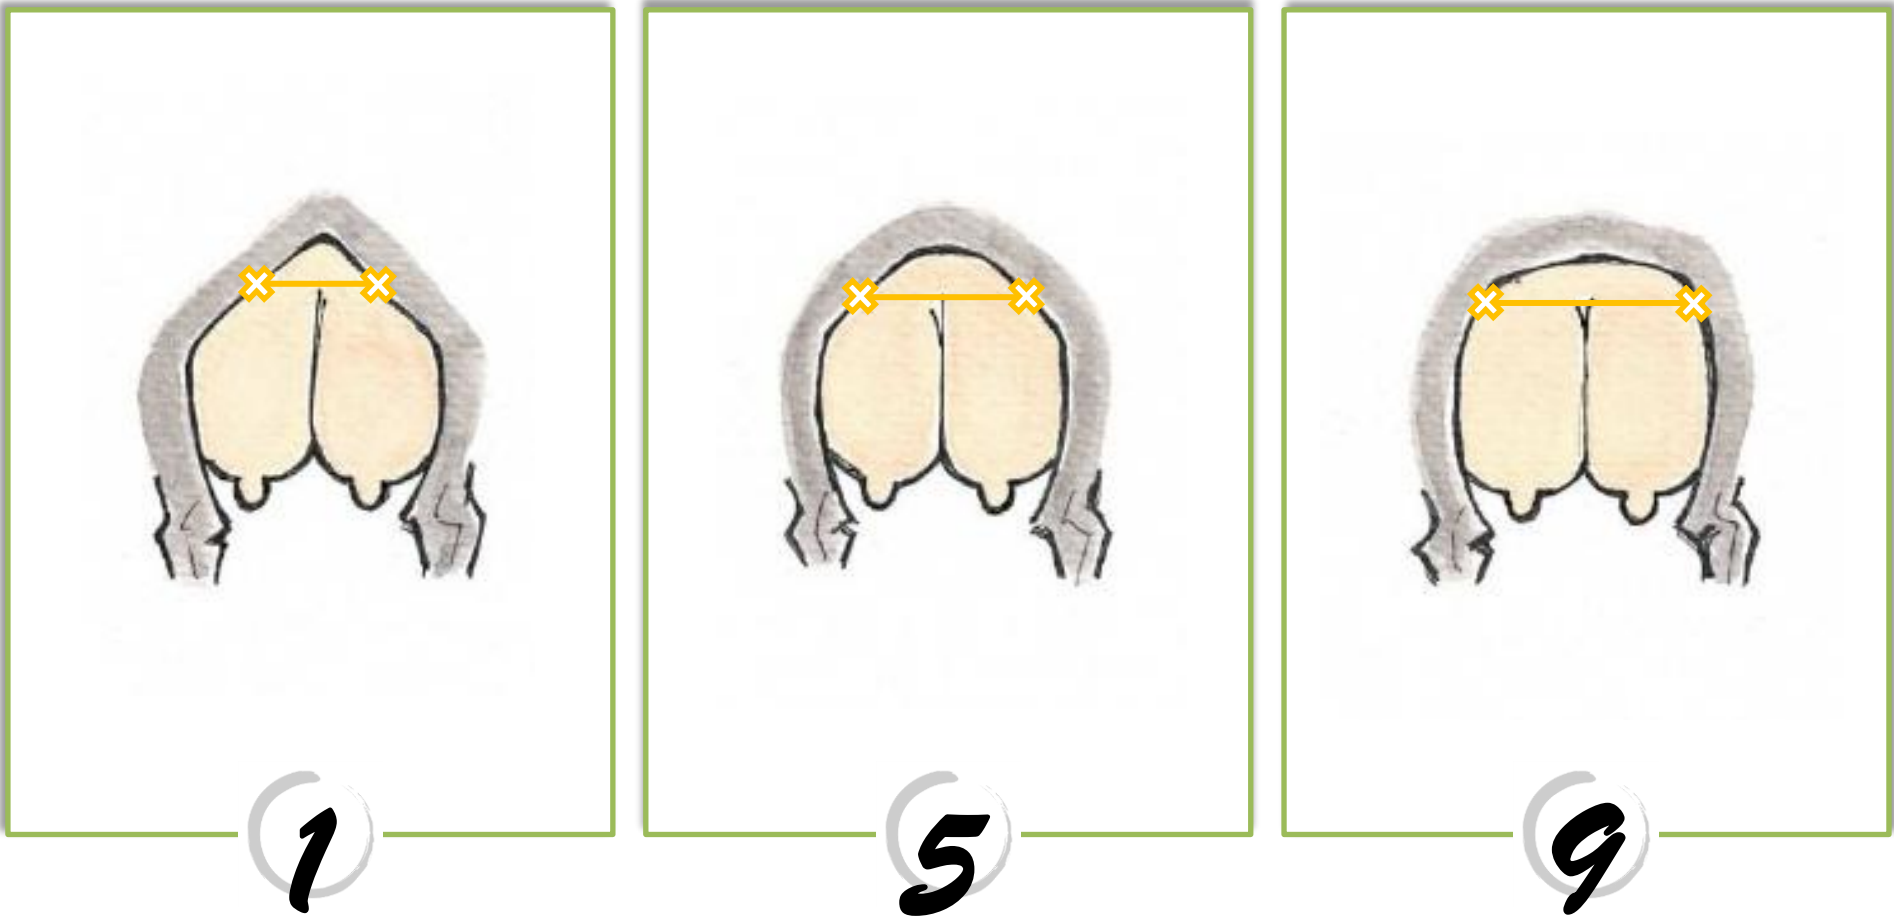

| Measure unit | Score |   |   |   |   |   |   |    |    |
|--------------|-------|---|---|---|---|---|---|----|----|
|              | 1     | 2 | 3 | 4 | 5 | 6 | 7 | 8  | 9  |
| cm           | 3     | 4 | 5 | 6 | 7 | 8 | 9 | 10 | 11 |

The scale translation from LAS scores to traditional zoometric measurements in centimeters, as well as optimal values following the premises described in the breed standard for both phenotype collection methods, are provided below the depictions.



**Figure S12:** Graphical depictions of the scale for udder width in Murciano-Granadina does for dairy purpose-related zoometric assessment.

*Udder depth*

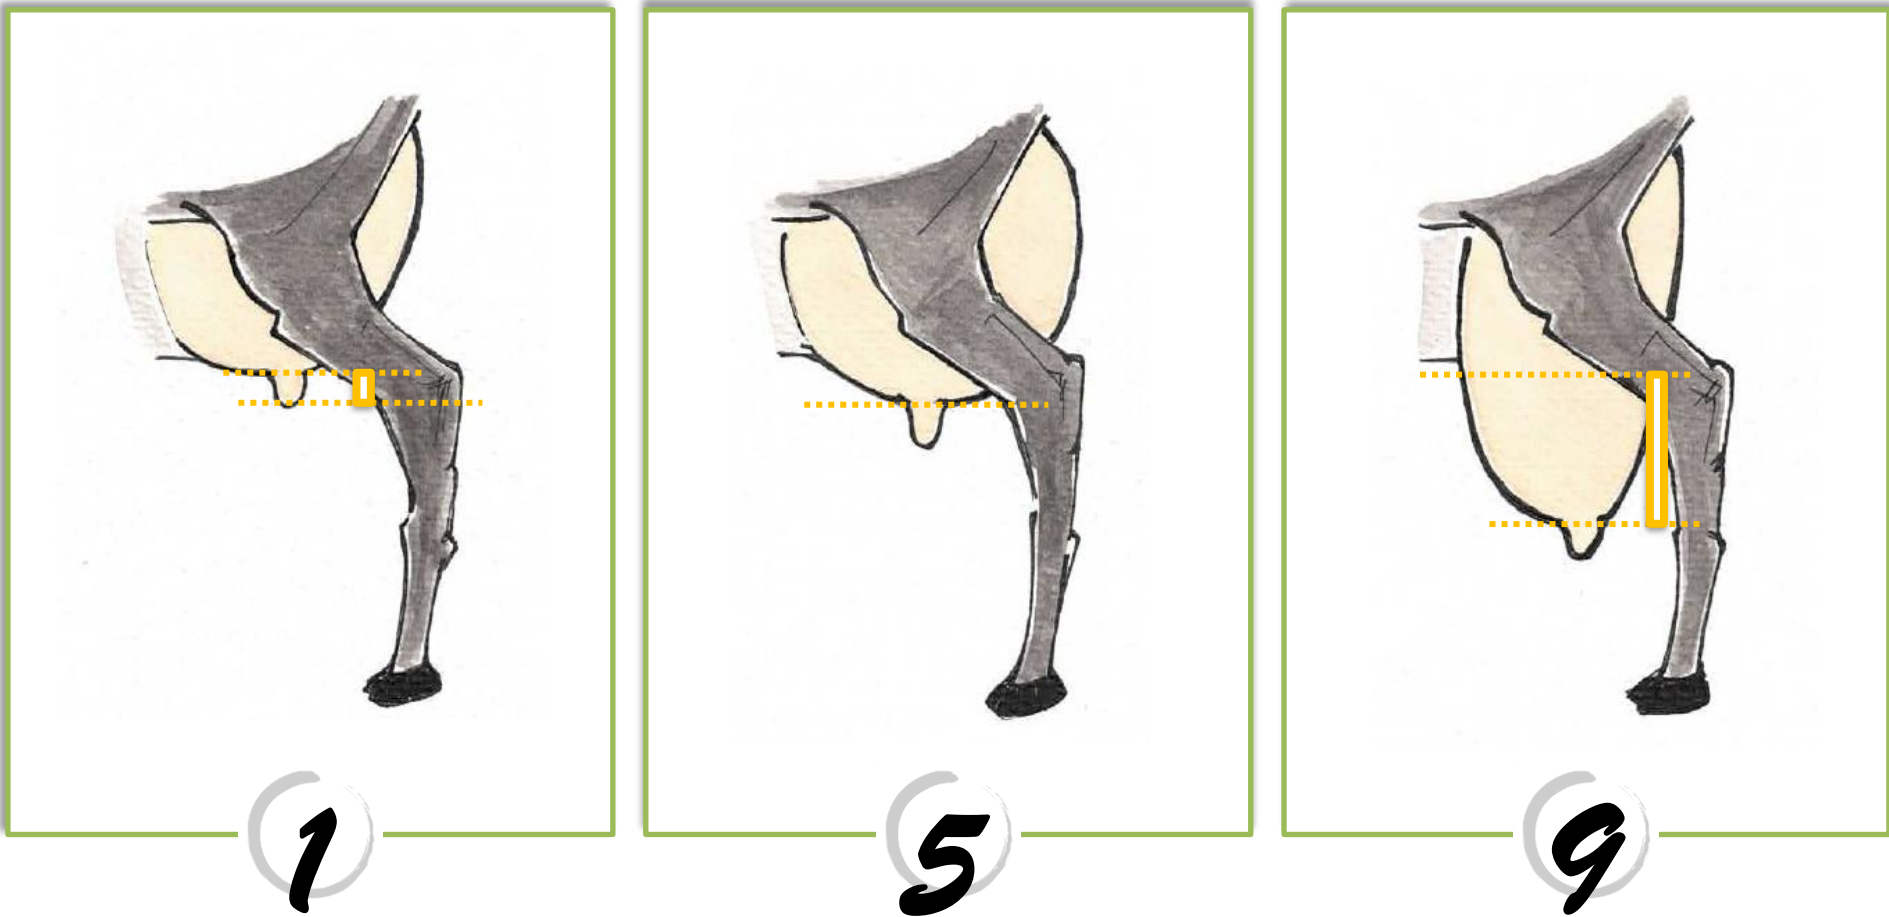

| Measure unit | Score |      |    |      |   |     |   |     |    |
|--------------|-------|------|----|------|---|-----|---|-----|----|
|              | 1     | 2    | 3  | 4    | 5 | 6   | 7 | 8   | 9  |
| cm           | -10   | -7,5 | -5 | -2,5 | 0 | 2,5 | 5 | 7,5 | 10 |

The scale translation from LAS scores to traditional zoometric measurements in centimeters, as well as optimal values following the premises described in the breed standard for both phenotype collection methods, are provided below the depictions.

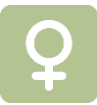

**Figure S13:** Graphical depictions of the scale for nipple placement in Murciano-Granadina does for dairy purpose-related zoometric assessment.

*Nipple placement*

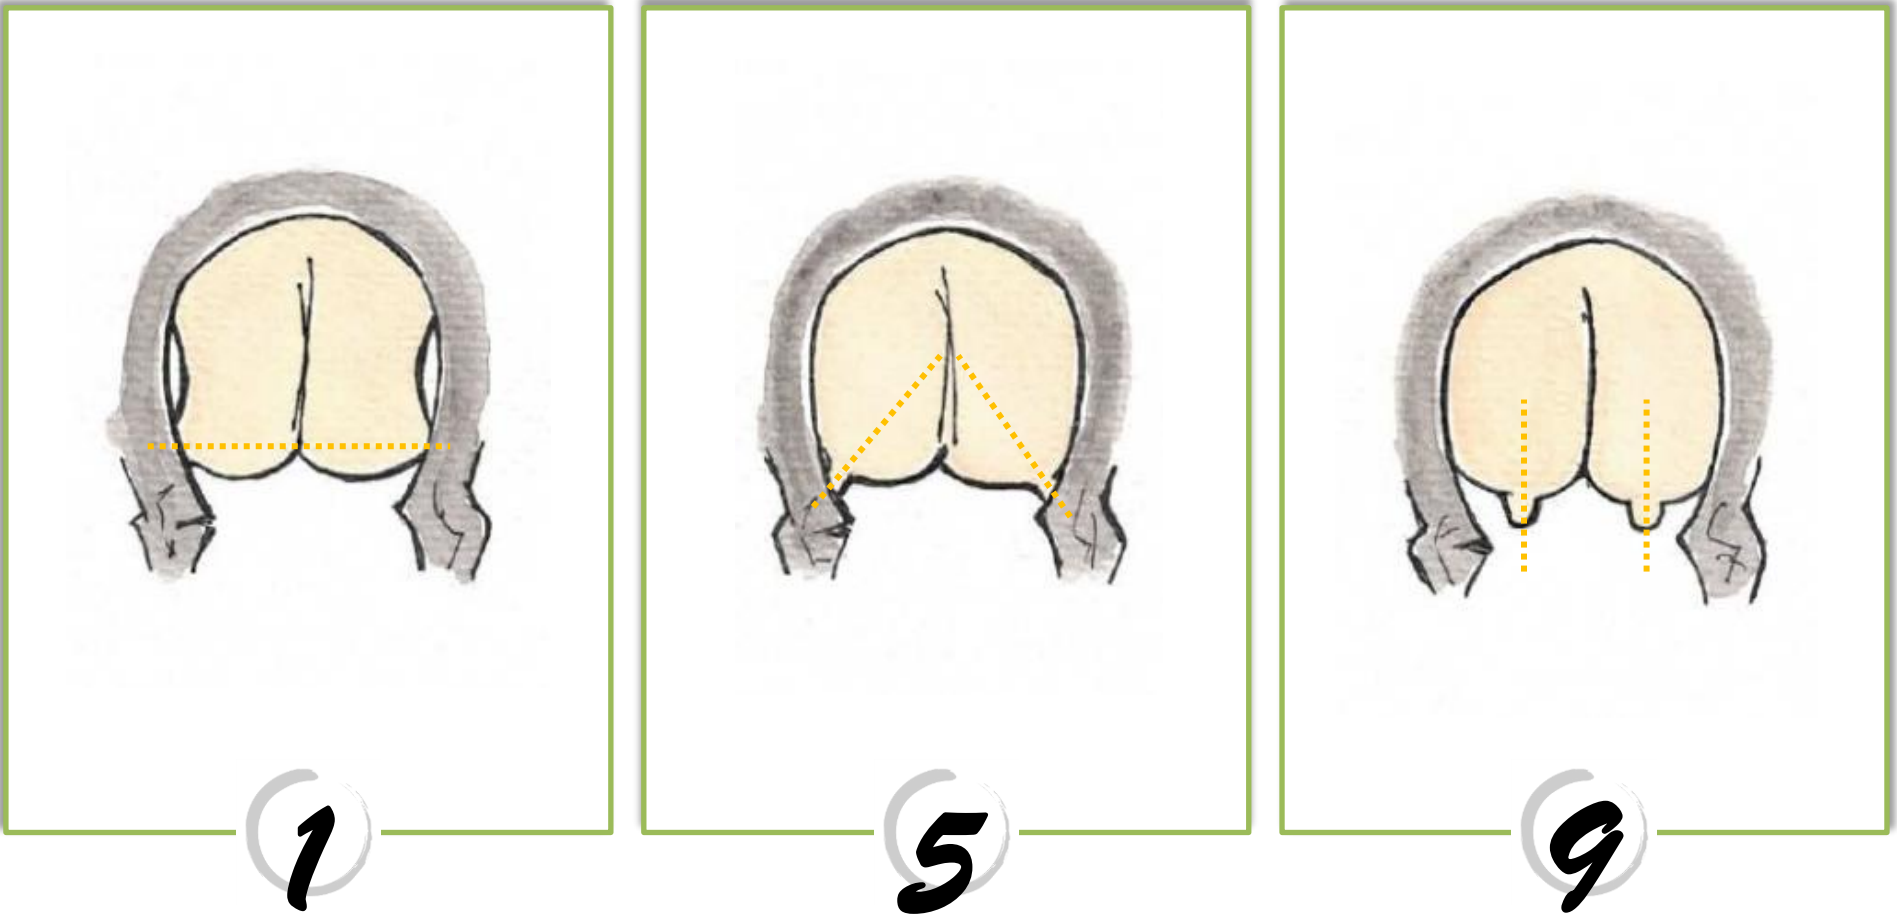

| Score |     |    |
|-------|-----|----|
| 1     | 5   | 9  |
| 90º   | 45º | 0º |

The scale translation from LAS scores to traditional zoometric measurements in centimeters, as well as optimal values following the premises described in the breed standard for both phenotype collection methods, are provided below the depictions.

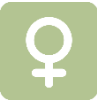

**Figure S14:** Graphical depictions of the scale for nipple diameter in Murciano-Granadina does for dairy purpose-related zoometric assessment.

*Nipple diameter*

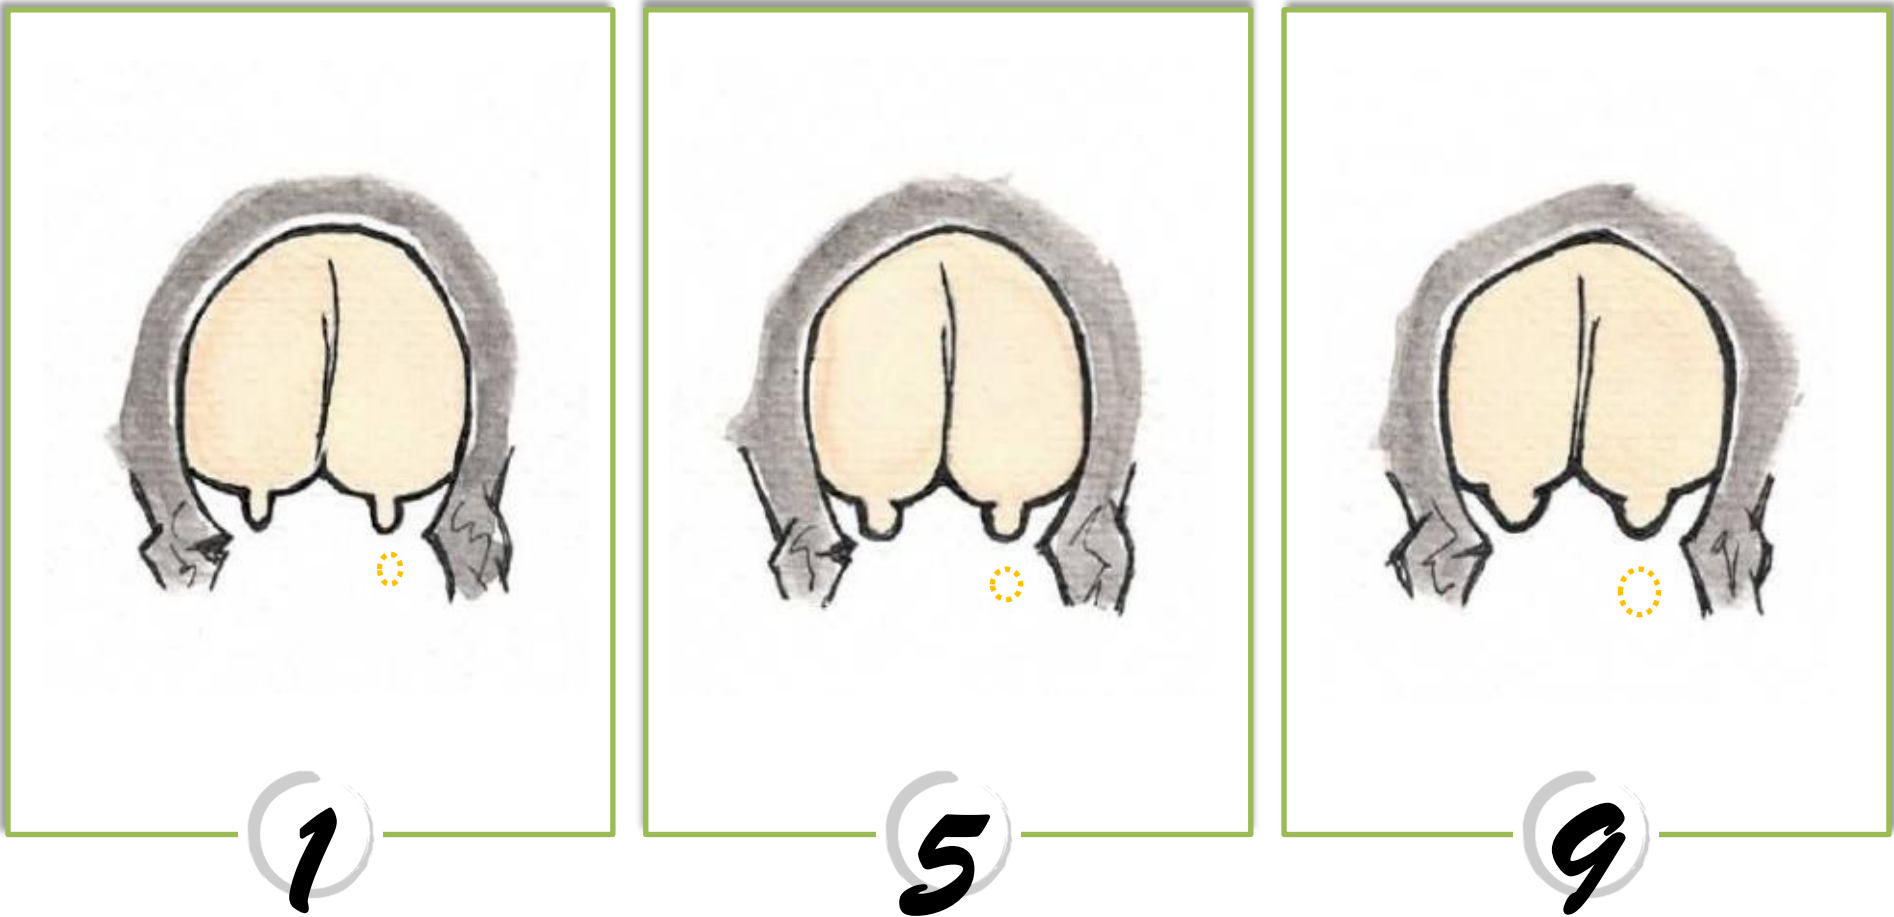

| Measure unit | Score |   |     |   |     |   |     |   |     |
|--------------|-------|---|-----|---|-----|---|-----|---|-----|
|              | 1     | 2 | 3   | 4 | 5   | 6 | 7   | 8 | 9   |
| cm           | 0,5   | 1 | 1,5 | 2 | 2,5 | 3 | 3,5 | 4 | 4,5 |

The scale translation from LAS scores to traditional zoometric measurements in centimeters, as well as optimal values following the premises described in the breed standard for both phenotype collection methods, are provided below the depictions.



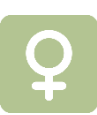

**Figure S15:** Graphical depictions of the scale for rear legs, rear view in Murciano-Granadina does for dairy purpose-related zoometric assessment.

*Rear legs, Rear view*

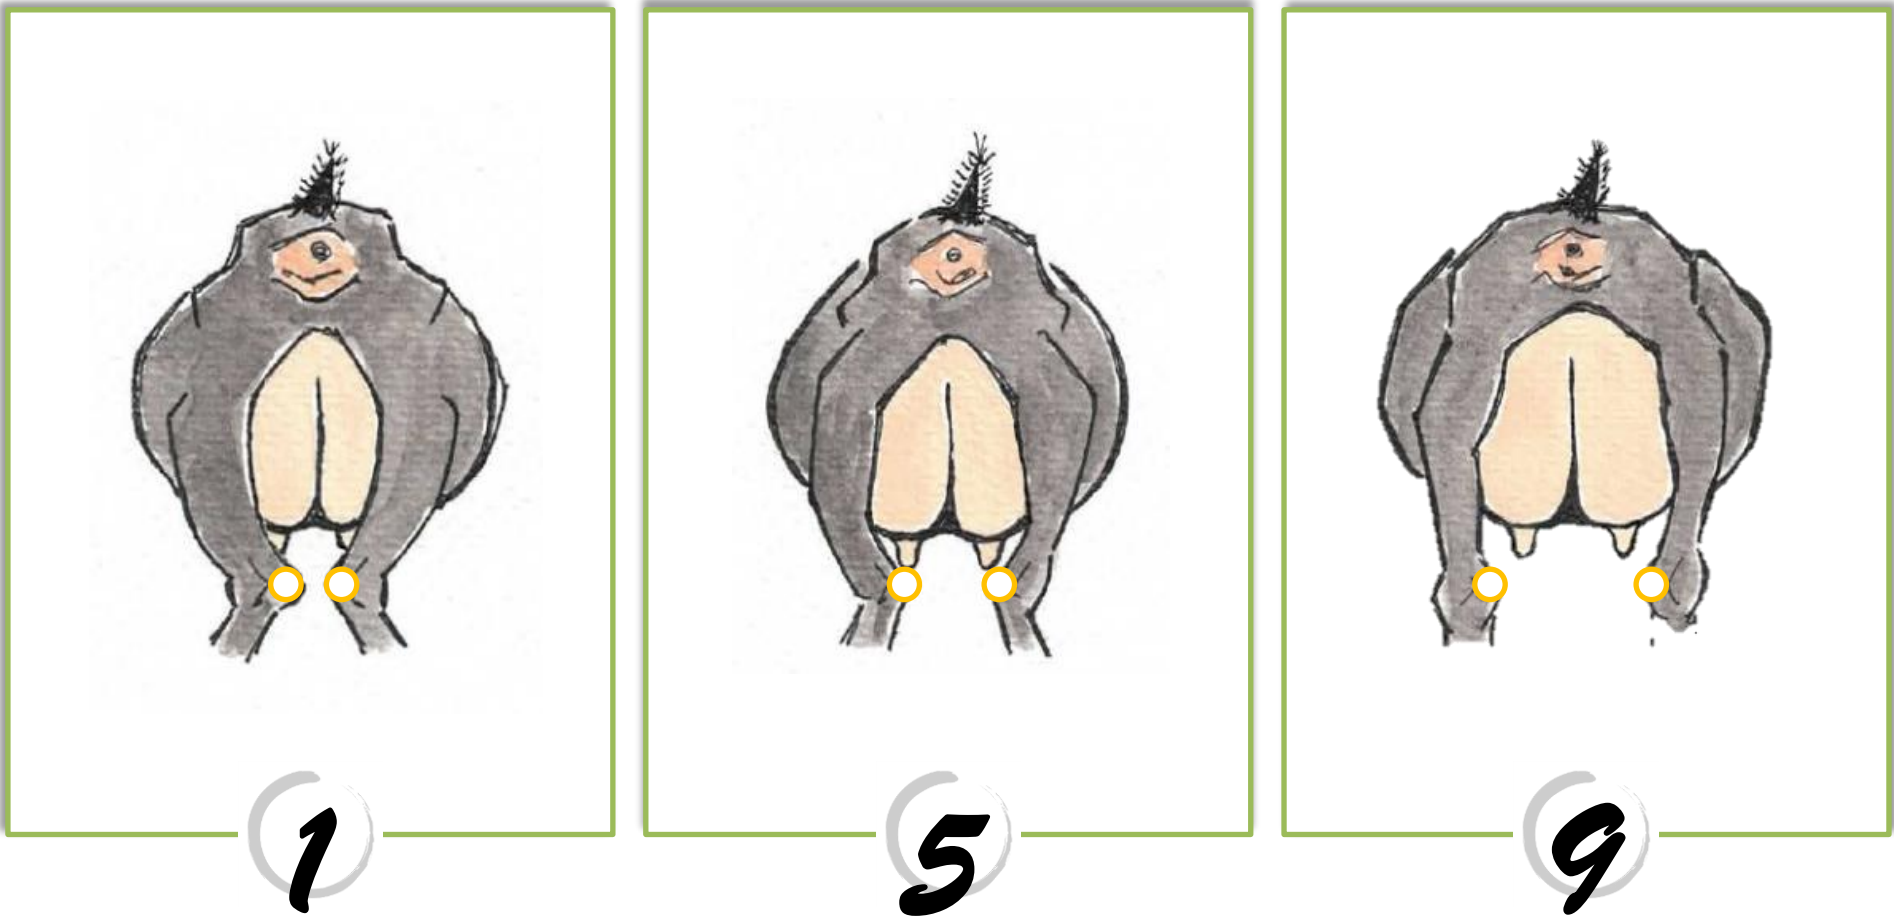

| Score             |                       |                              |
|-------------------|-----------------------|------------------------------|
| 1                 | 5                     | 9                            |
| Very closed hocks | Slightly closed hocks | Parallel and separated hocks |

The scale translation from LAS scores to traditional zoometric measurements in centimeters, as well as optimal values following the premises described in the breed standard for both phenotype collection methods, are provided below the depictions.



**Figure S16:** Graphical depictions of the scale for rear legs, side view in Murciano-Granadina does for dairy purpose-related zoometric assessment.

*Rear legs, Side view*

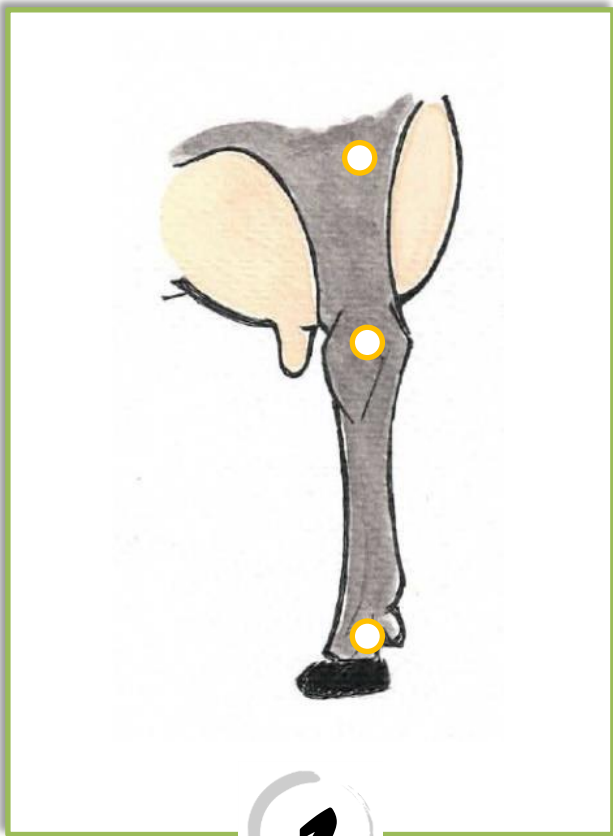

1

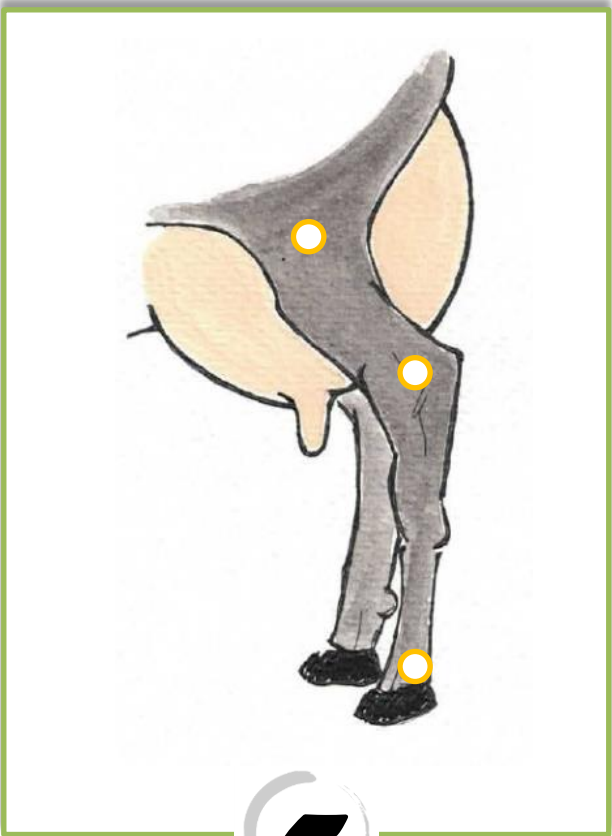

5

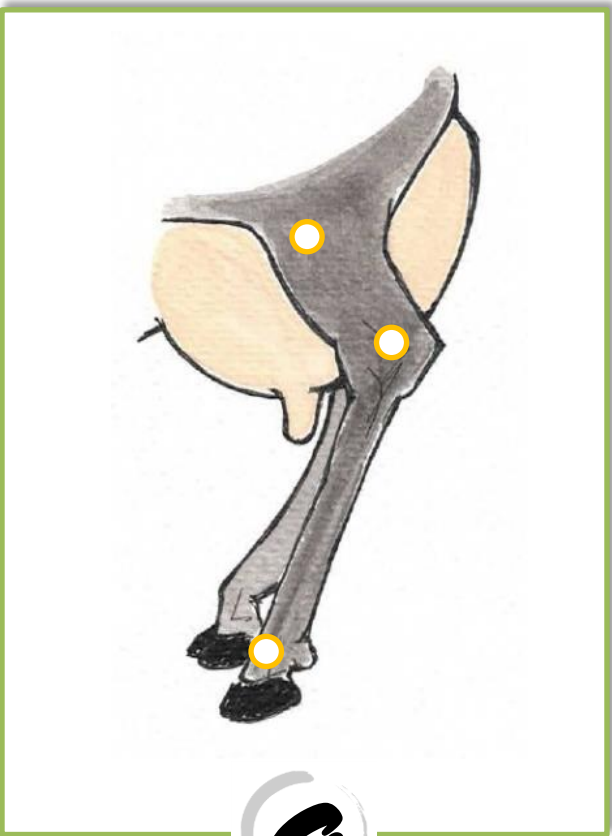

9

| Score    |                     |             |
|----------|---------------------|-------------|
| 1        | 5                   | 9           |
| Straight | Desirable curvature | Very curved |

The scale translation from LAS scores to traditional zoometric measurements in centimeters, as well as optimal values following the premises described in the breed standard for both phenotype collection methods, are provided below the depictions.



**Figure S17:** Graphical depictions of the scale for mobility in Murciano-Granadina does for dairy purpose-related zoometric assessment.

*Mobility*

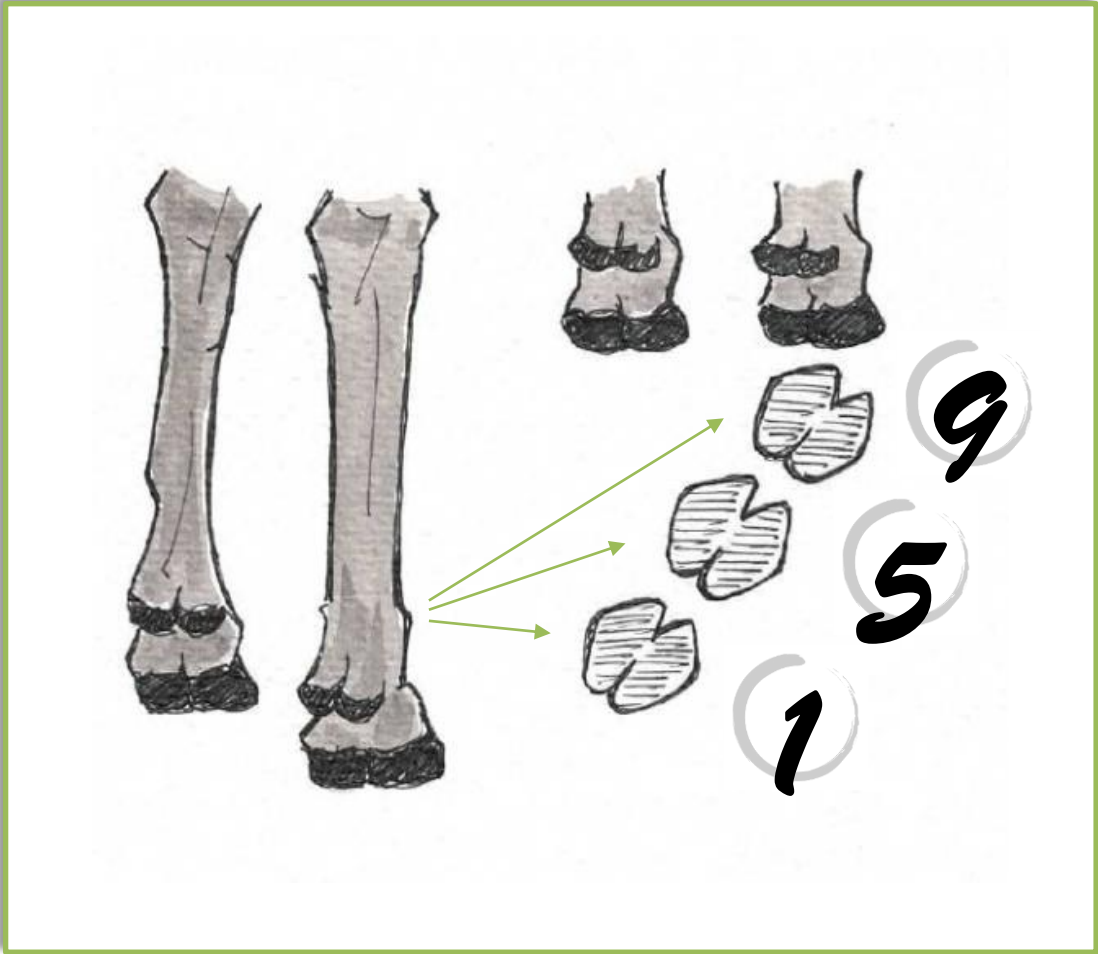

|   |                                                             |
|---|-------------------------------------------------------------|
| 1 | Very bad mobility due to skeleton structure                 |
| 2 | Severe ab/adduction. Unequal step. Short stride             |
| 3 | Ab/adduction. Unequal step                                  |
| 4 | Slight ab/adduction. Uniform step. Short stride             |
| 5 | Very slight ab/adduction. Uniform step. Intermediate stride |
| 6 | Straight and uniform step. Intermediate stride              |
| 7 | Straight and uniform step. Long stride                      |
| 8 | Straight and uniform step. Long and strong stride           |
| 9 | Straight and uniform step. Too long and strong stride       |

The scale translation from LAS scores to traditional zoometric measurements in centimeters, as well as optimal values following the premises described in the breed standard for both phenotype collection methods, are provided below the depictions.

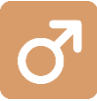

**Figure S18:** Graphical depictions of the scale for stature in Murciano-Granadina bucks for dairy purpose-related zoometric assessment.

*Stature*

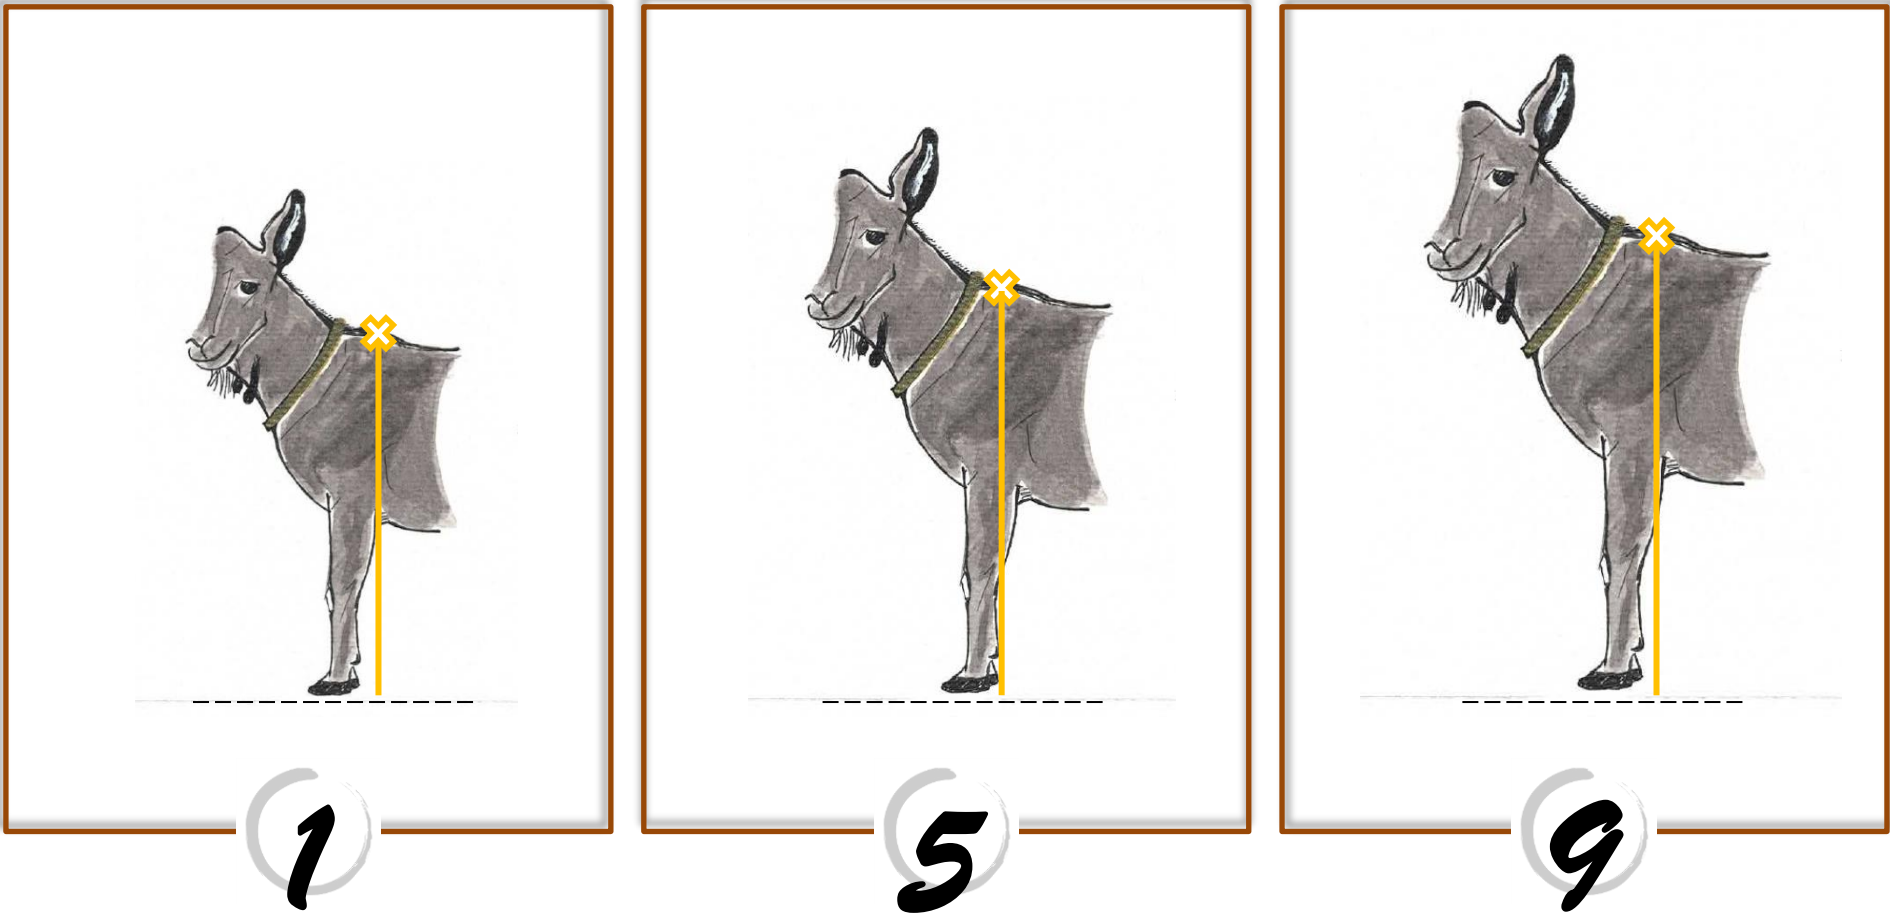

| Measure unit | Score |    |    |    |    |    |    |    |    |
|--------------|-------|----|----|----|----|----|----|----|----|
|              | 1     | 2  | 3  | 4  | 5  | 6  | 7  | 8  | 9  |
| cm           | 68    | 71 | 74 | 77 | 80 | 83 | 86 | 86 | 92 |

The scale translation from LAS scores to traditional zoometric measurements in centimeters, as well as optimal values following the premises described in the breed standard for both phenotype collection methods, are provided below the depictions.

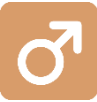

**Figure S19:** Graphical depictions of the scale for chest width in Murciano-Granadina bucks for dairy purpose-related zoometric assessment.

*Chest width*

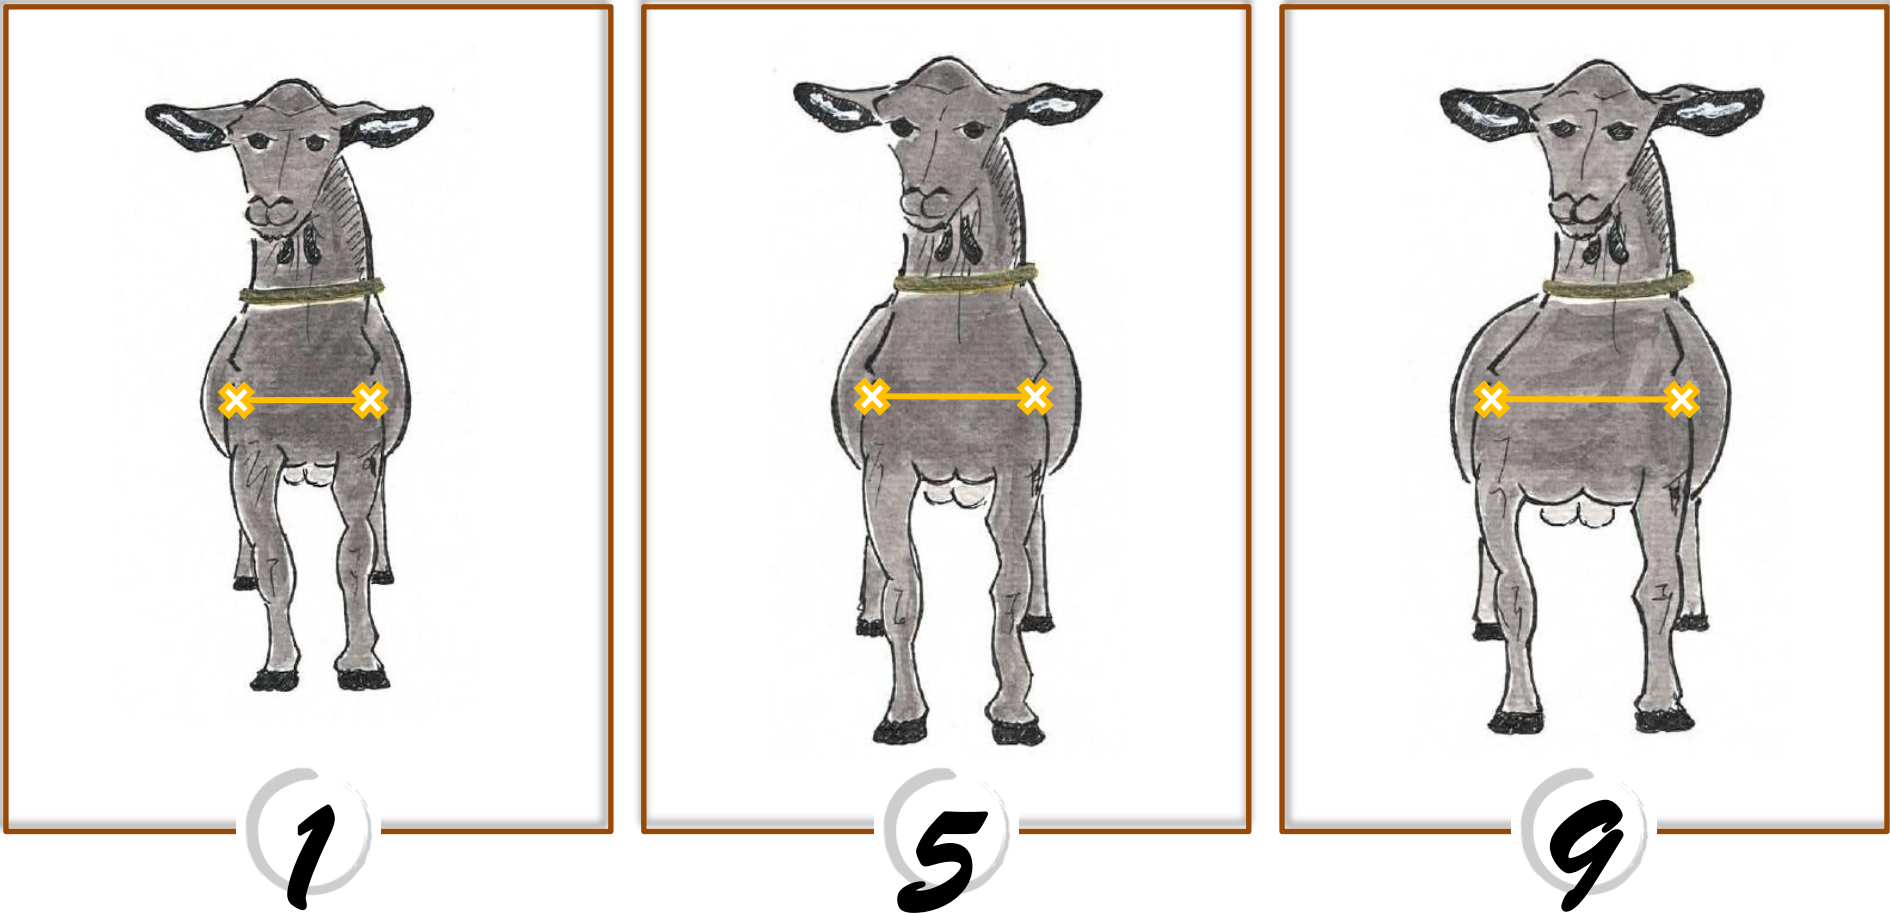

| Measure unit | Score |    |    |    |    |    |    |    |    |
|--------------|-------|----|----|----|----|----|----|----|----|
|              | 1     | 2  | 3  | 4  | 5  | 6  | 7  | 8  | 9  |
| cm           | 15    | 17 | 19 | 21 | 23 | 25 | 27 | 29 | 31 |

The scale translation from LAS scores to traditional zoometric measurements in centimeters, as well as optimal values following the premises described in the breed standard for both phenotype collection methods, are provided below the depictions.



**Figure S20:** Graphical depictions of the scale for body depth in Murciano-Granadina bucks for dairy purpose-related zoometric assessment.

*Body depth*

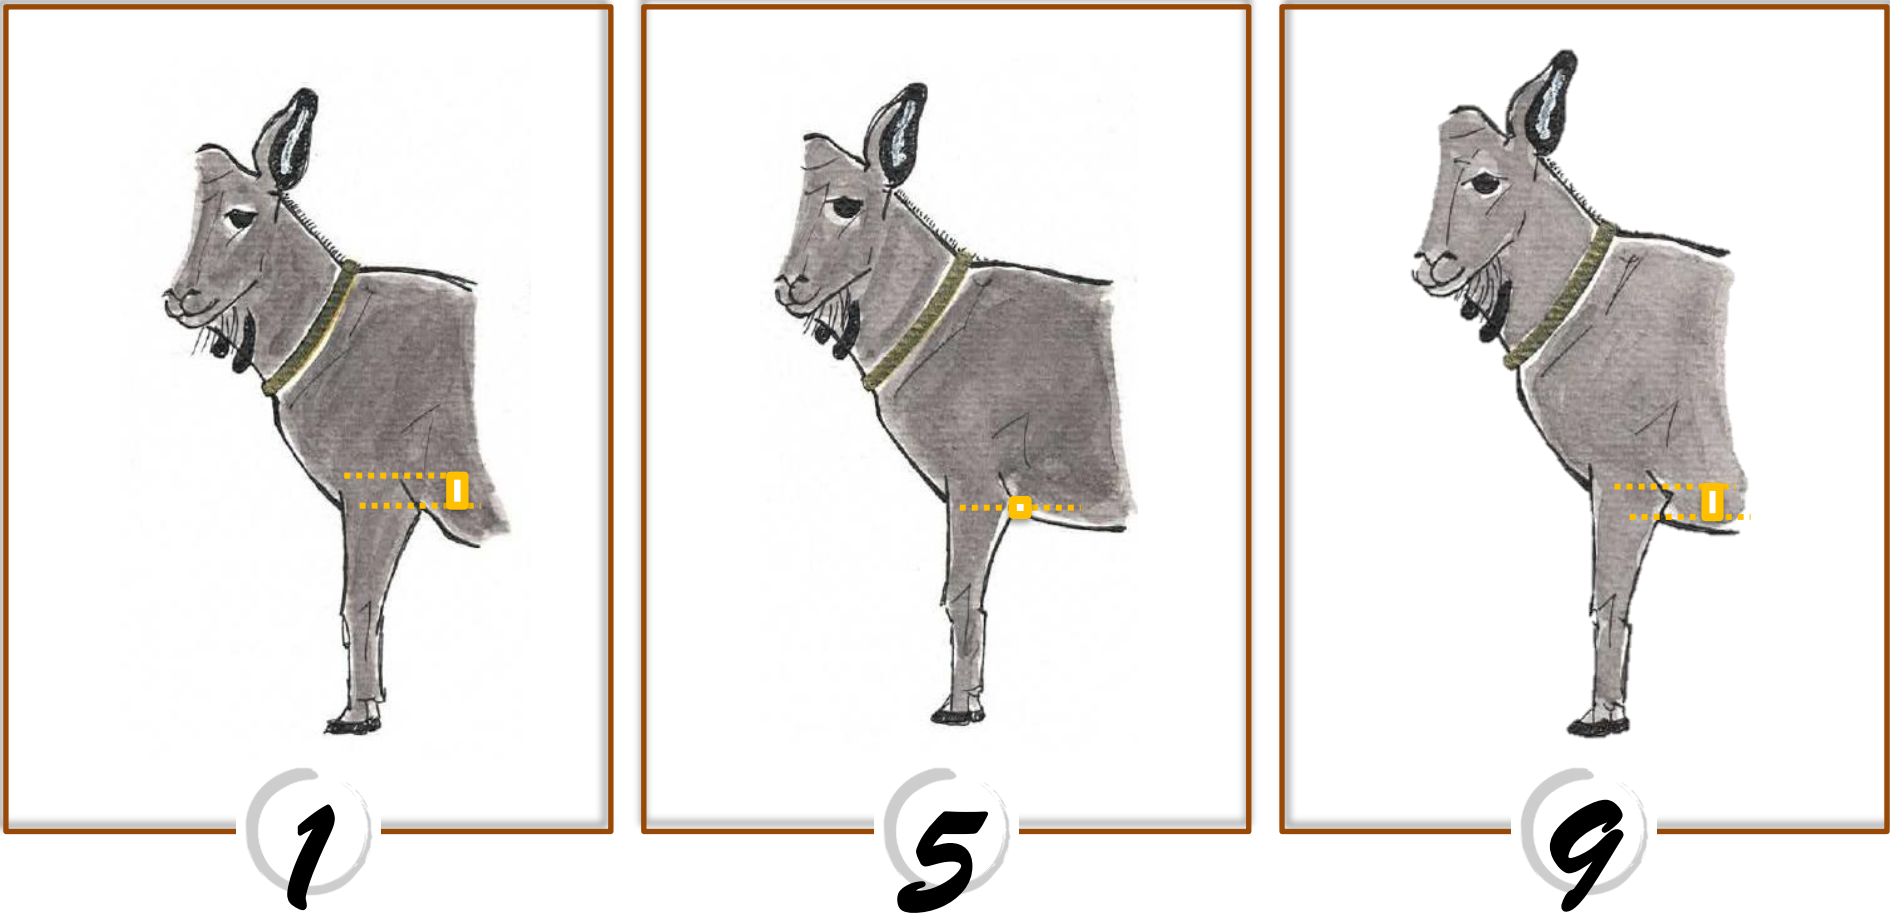

| Score   |              |                |
|---------|--------------|----------------|
| 1       | 5            | 9              |
| Shallow | Intermediate | Extremely deep |

The scale translation from LAS scores to traditional zoometric measurements in centimeters, as well as optimal values following the premises described in the breed standard for both phenotype collection methods, are provided below the depictions.





**Figure S21:** Graphical depictions of the scale for rump width in Murciano-Granadina bucks for dairy purpose-related zoometric assessment.

*Rump width*

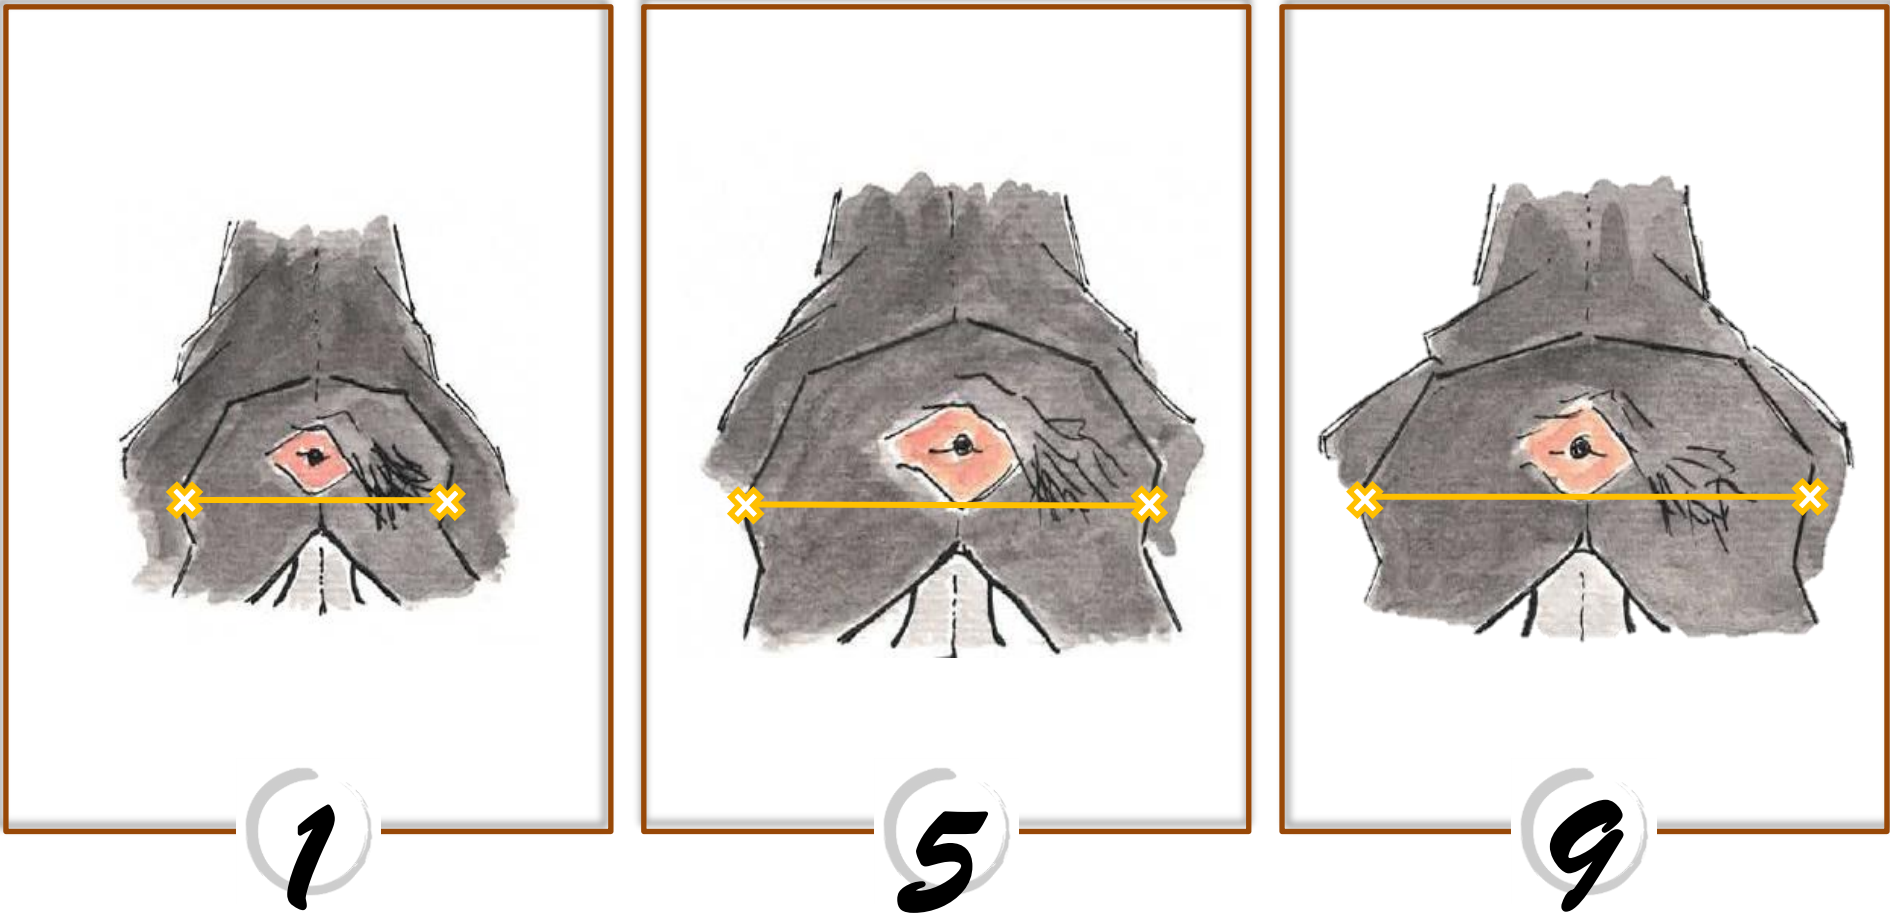

| Measure unit | Score |    |    |    |    |    |    |    |    |
|--------------|-------|----|----|----|----|----|----|----|----|
|              | 1     | 2  | 3  | 4  | 5  | 6  | 7  | 8  | 9  |
| cm           | 14    | 15 | 16 | 17 | 18 | 19 | 20 | 21 | 22 |

The scale translation from LAS scores to traditional zoometric measurements in centimeters, as well as optimal values following the premises described in the breed standard for both phenotype collection methods, are provided below the depictions.



Figure S22: Graphical depictions of the scale for rump angle in Murciano-Granadina bucks for dairy purpose-related zoometric assessment.

Rump angle

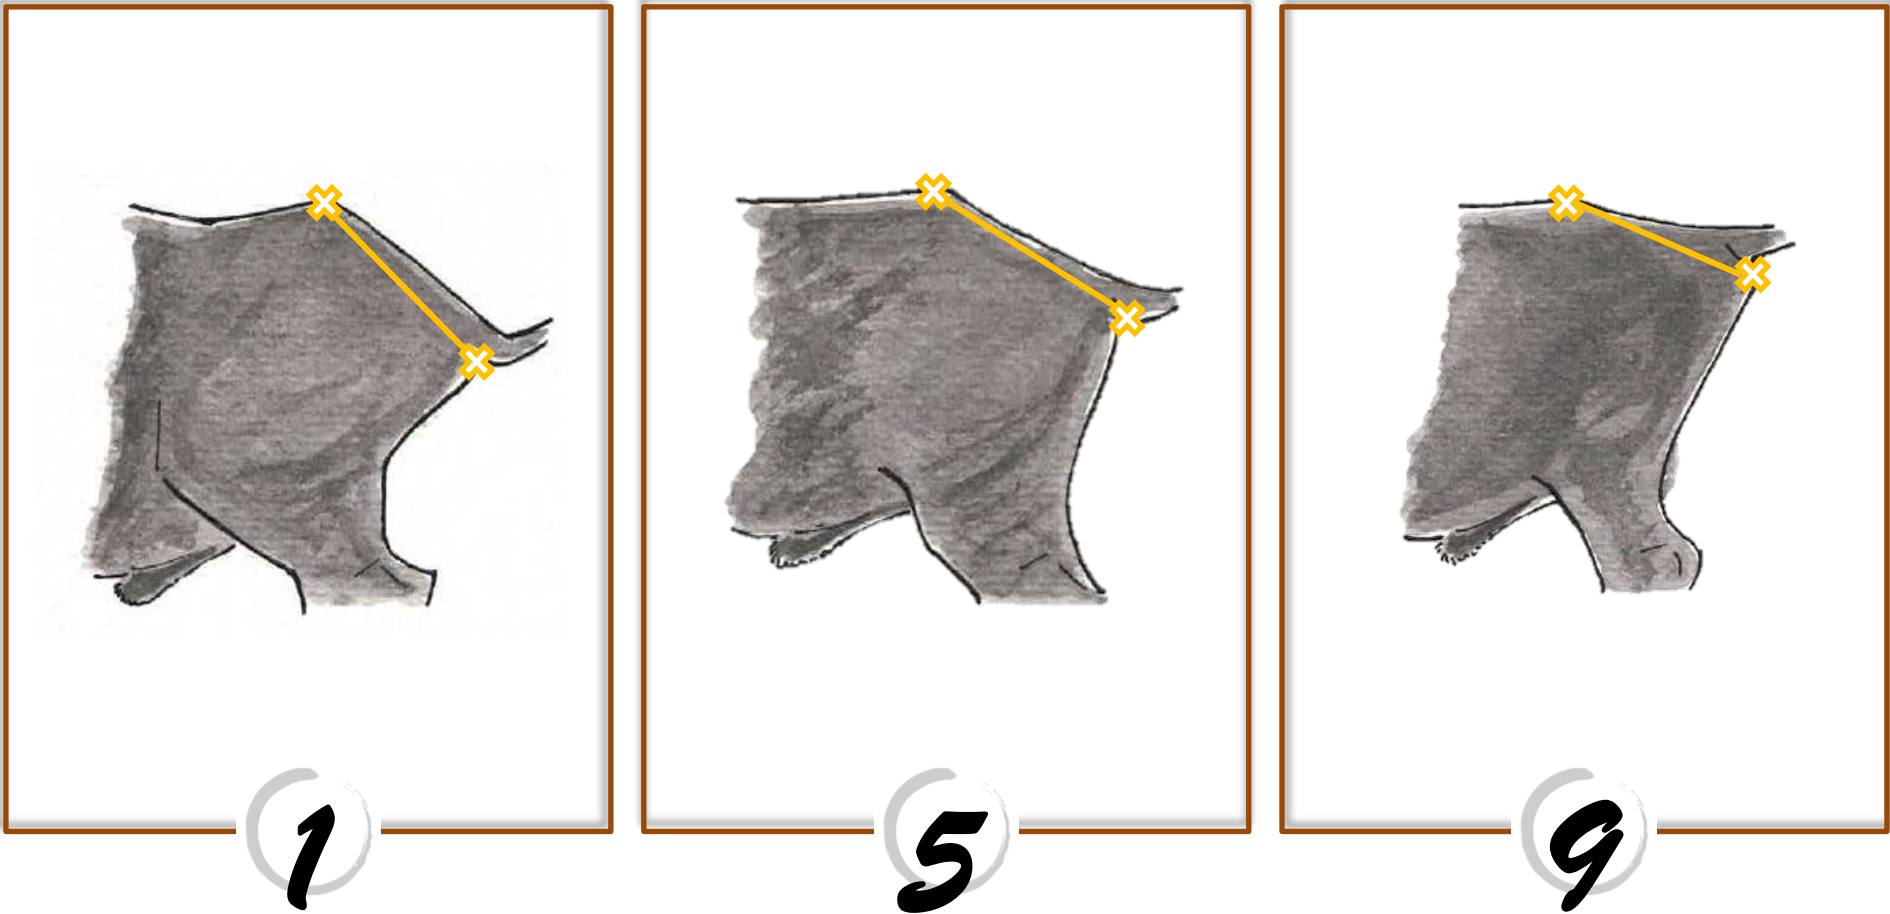

| Measure unit | Score |    |    |    |    |    |    |    |    |
|--------------|-------|----|----|----|----|----|----|----|----|
|              | 1     | 2  | 3  | 4  | 5  | 6  | 7  | 8  | 9  |
| cm           | 55    | 52 | 49 | 46 | 43 | 40 | 37 | 34 | 31 |

The scale translation from LAS scores to traditional zoometric measurements in centimeters, as well as optimal values following the premises described in the breed standard for both phenotype collection methods, are provided below the depictions.



**Figure S23:** Graphical depictions of the scale for angulosity in Murciano-Granadina bucks for dairy purpose-related zoometric assessment.

*Angulosity*

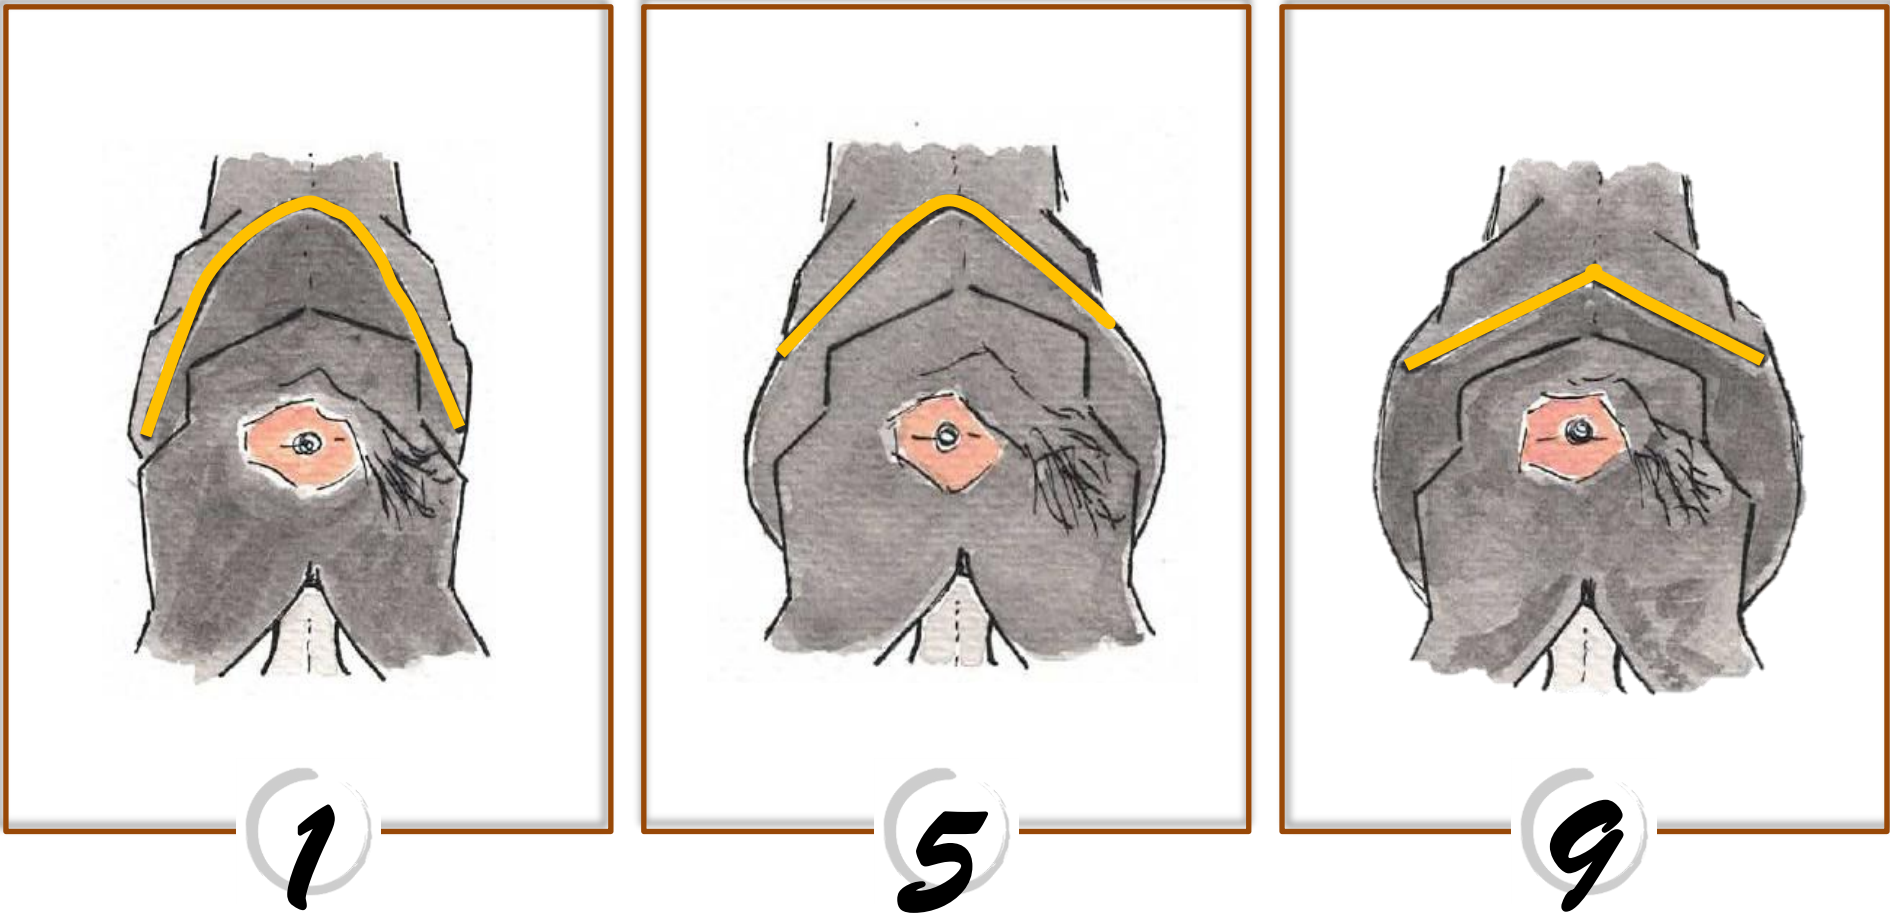

| Score           |              |                    |
|-----------------|--------------|--------------------|
| 1               | 5            | 9                  |
| Rough extremity | Intermediate | Angulous extremity |

The scale translation from LAS scores to traditional zoometric measurements in centimeters, as well as optimal values following the premises described in the breed standard for both phenotype collection methods, are provided below the depictions.



**Figure S24:** Graphical depictions of the scale for bone quality in Murciano-Granadina bucks for dairy purpose-related zoometric assessment.

*Bone quality*

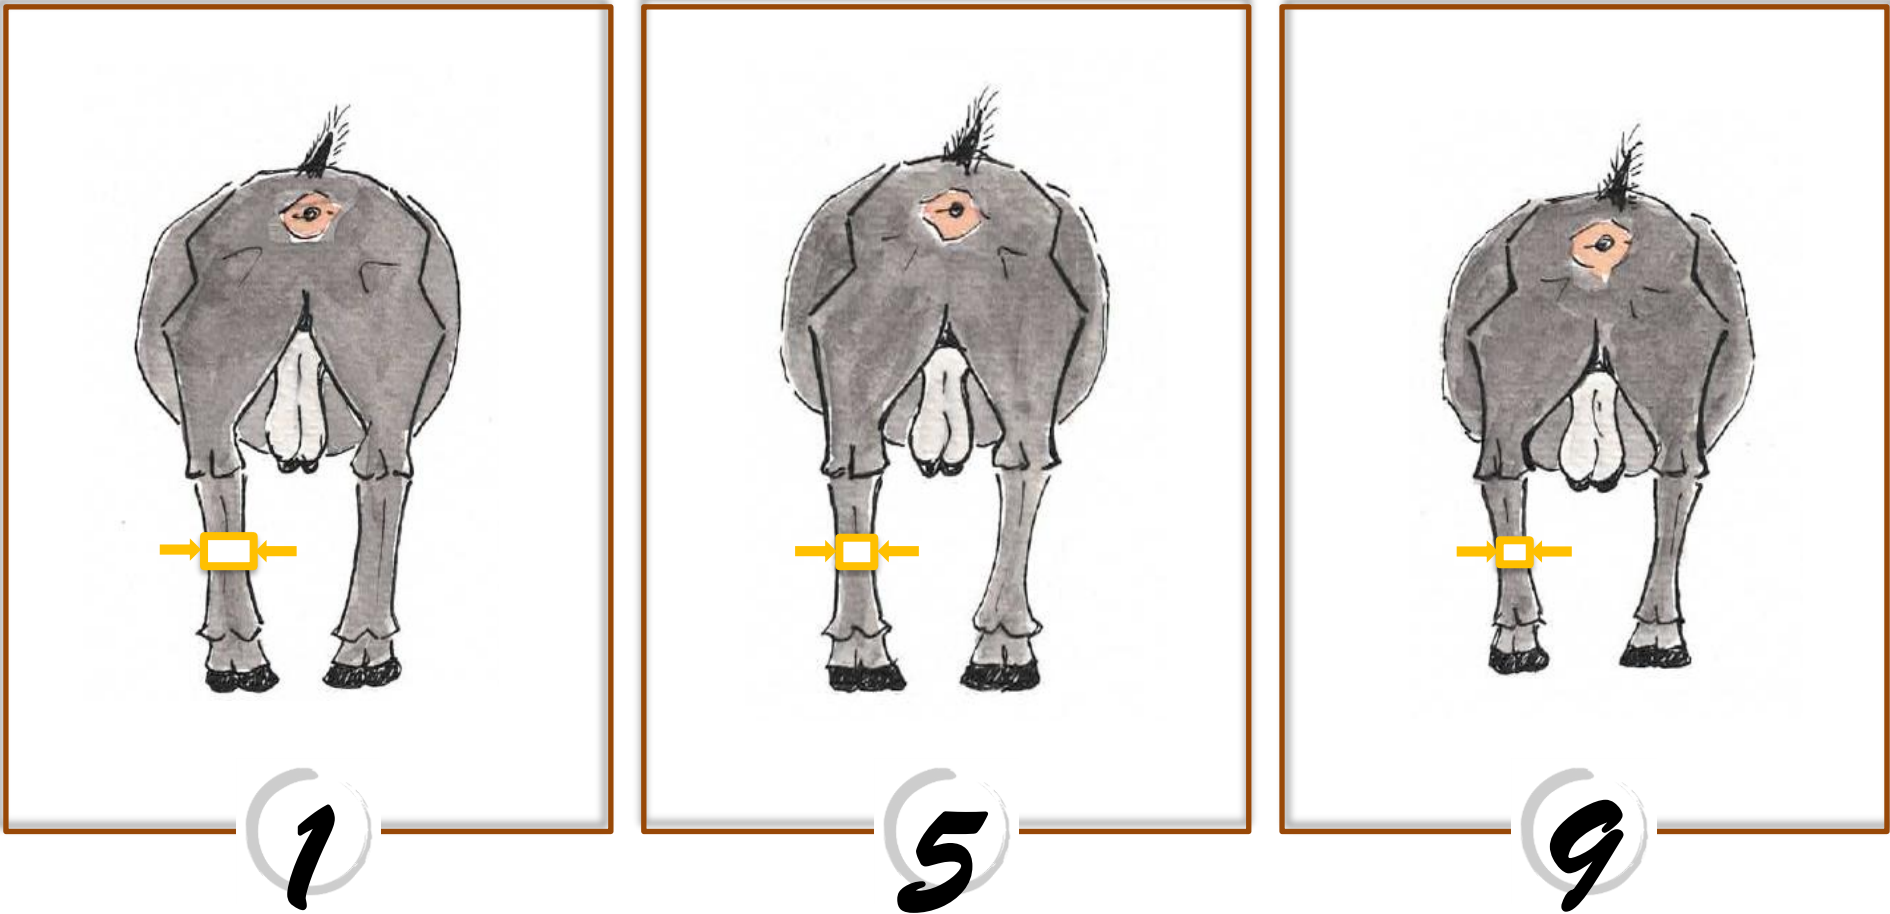

| Score                 |              |                     |
|-----------------------|--------------|---------------------|
| 1                     | 5            | 9                   |
| Round and rough bones | Intermediate | Flat and neat bones |

The scale translation from LAS scores to traditional zoometric measurements in centimeters, as well as optimal values following the premises described in the breed standard for both phenotype collection methods, are provided below the depictions.

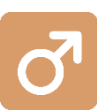

Figure S25: Graphical depictions of the scale for rear legs, rear view in Murciano-Granadina bucks for dairy purpose-related zoometric assessment.

*Rear legs, Rear view*

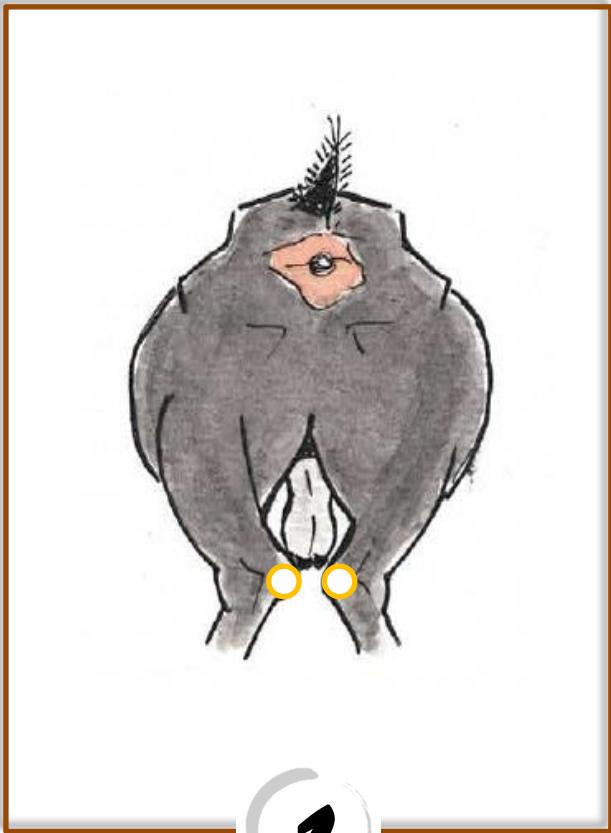

1

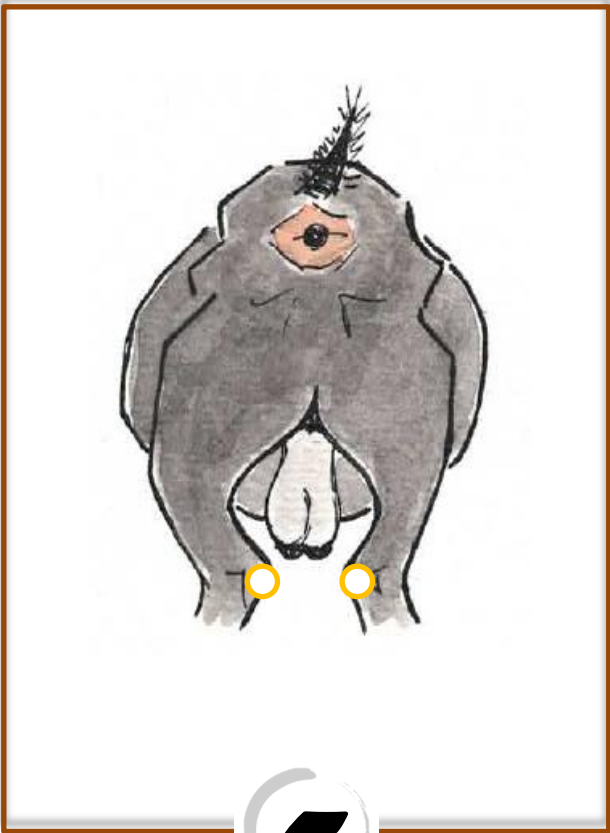

5

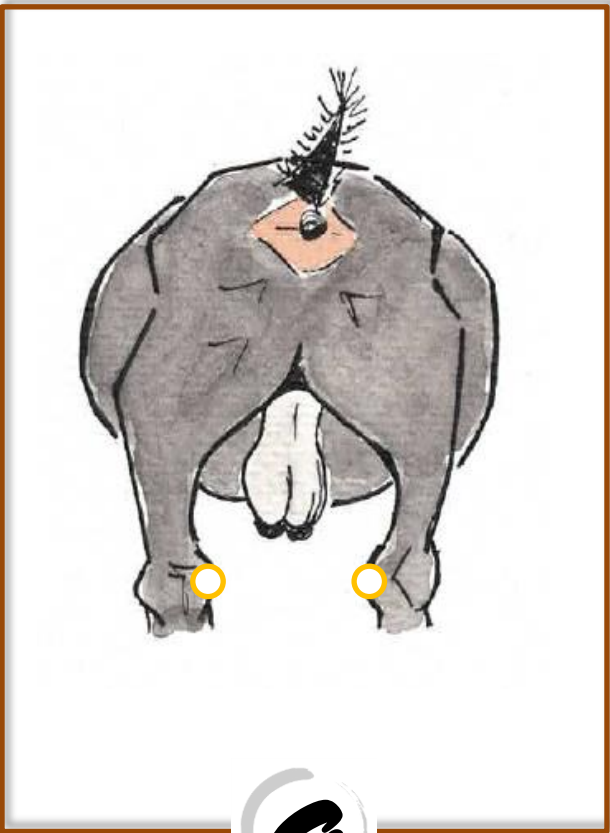

9

| Score             |                       |                              |
|-------------------|-----------------------|------------------------------|
| 1                 | 5                     | 9                            |
| Very closed hocks | Slightly closed hocks | Parallel and separated hocks |

The scale translation from LAS scores to traditional zoometric measurements in centimeters, as well as optimal values following the premises described in the breed standard for both phenotype collection methods, are provided below the depictions.





**Figure S26:** Graphical depictions of the scale for rear legs, side view in Murciano-Granadina bucks for dairy purpose-related zoometric assessment.

*Rear legs, Side view*

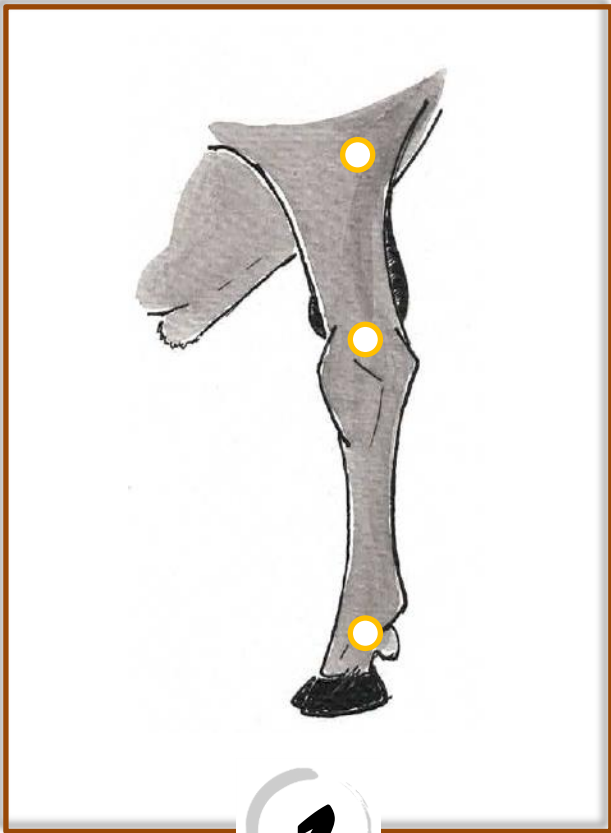

1

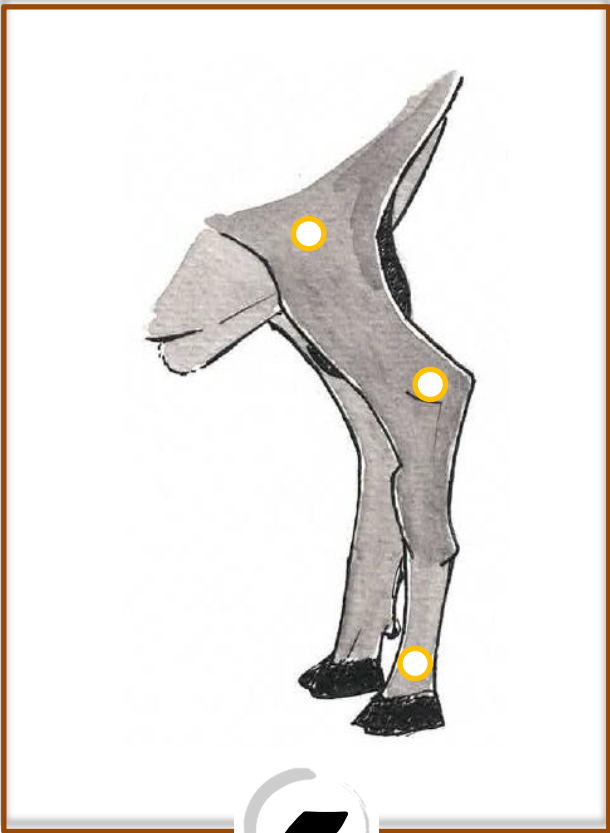

5

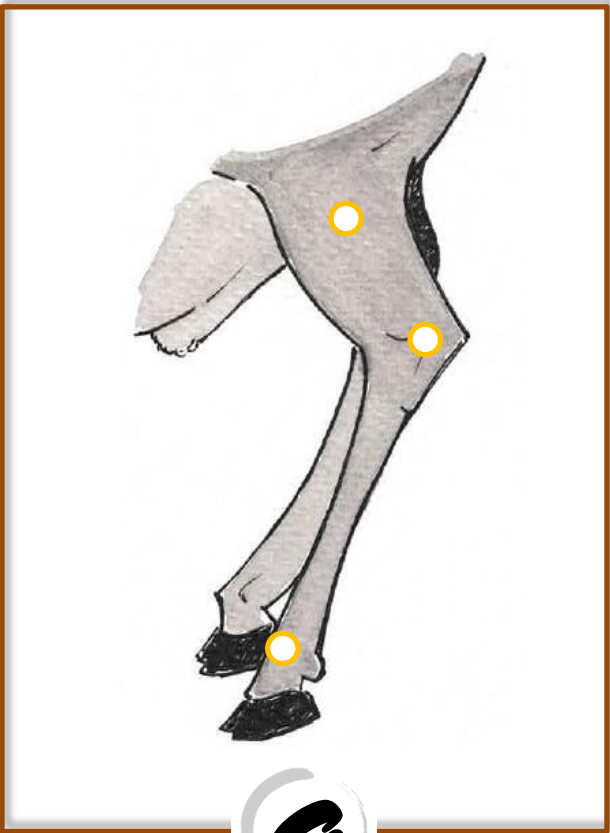

9

| Score    |                     |             |
|----------|---------------------|-------------|
| 1        | 5                   | 9           |
| Straight | Desirable curvature | Very curved |

The scale translation from LAS scores to traditional zoometric measurements in centimeters, as well as optimal values following the premises described in the breed standard for both phenotype collection methods, are provided below the depictions.





**Figure S27:** Graphical depictions of the scale for mobility in Murciano-Granadina bucks for dairy purpose-related zoometric assessment.

*Mobility*

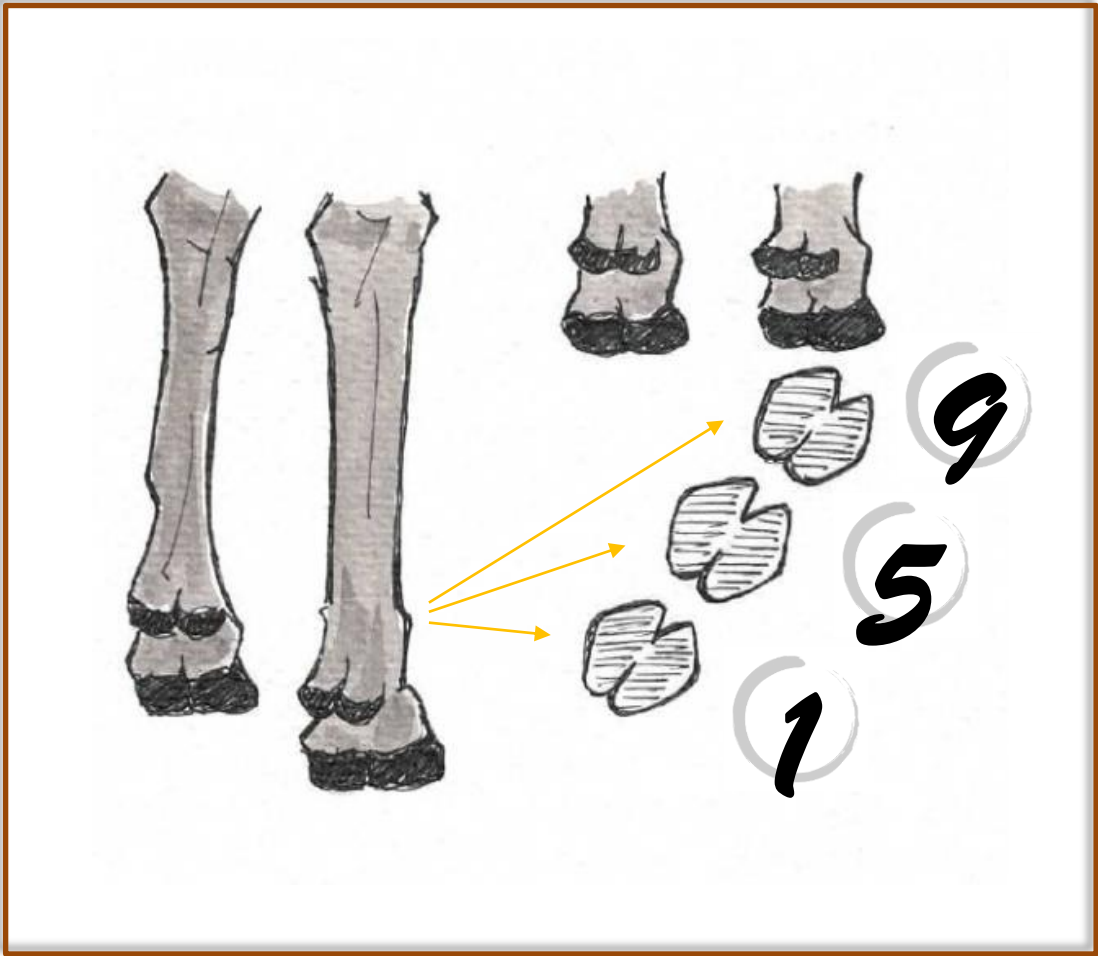

|   |                                                             |
|---|-------------------------------------------------------------|
| 1 | Very bad mobility due to skeleton structure                 |
| 2 | Severe ab/adduction. Unequal step. Short stride             |
| 3 | Ab/adduction. Unequal step                                  |
| 4 | Slight ab/adduction. Uniform step. Short stride             |
| 5 | Very slight ab/adduction. Uniform step. Intermediate stride |
| 6 | Straight and uniform step. Intermediate stride              |
| 7 | Straight and uniform step. Long stride                      |
| 8 | Straight and uniform step. Long and strong stride           |
| 9 | Straight and uniform step. Too long and strong stride       |

The scale translation from LAS scores to traditional zoometric measurements in centimeters, as well as optimal values following the premises described in the breed standard for both phenotype collection methods, are provided below the depictions.
