# Supplementary material for: Analysis of the Genetic Parameters for Dairy Linear Appraisal and Zoometric Traits: A Tool to Enhance the Applicability of Murciano-Granadina Goats Major Areas Evaluation System
Source: Animals (Basel). 2023 Mar 21;13(6):1114. doi: 10.3390/ani13061114 (PMC10044043; doi:10.3390/ani13061114)
Supplement: Supplementary file 1 [file animals-13-01114-s001.zip]

Archive with 6 entries (6 files):
- Figures S1 to S27.pdf
- Table S1.xlsx
- Table S2.xlsx
- Table S3.xlsx
- Table S4.xlsx
- Table S5.docx
