# Supplementary material for: Analysis of the Genetic Parameters for Dairy Linear Appraisal and Zoometric Traits: A Tool to Enhance the Applicability of Murciano-Granadina Goats Major Areas Evaluation System
Source: Animals (Basel). 2023 Mar 21;13(6):1114. doi: 10.3390/ani13061114 (PMC10044043; doi:10.3390/ani13061114)
Supplement: Supplementary file 1 [file animals-13-01114-s001.zip › Table S1.xlsx]

## Sheet: Information
Title	Analysis of the Genetic Parameters for Dairy Linear Appraisal and Zoometric Traits: A Tool to Enhance the Applicability of Murciano-Granadina goats Major Areas Evaluation System
Journal	Animals
Authors	Javier Fernández Álvarez, Francisco Javier Navas González, Jose Manuel León Jurado, Carlos Iglesias Pastrana and Juan Vicente Delgado Bermejo
Table S1.	Multicollinearity Testing Statistics (VIF and Tolerance) for environmental fixed effects and covariates. Candidates for discard on each round in italics.

## Sheet: VIF and Tolerance
Statistic	R²	Tolerance	VIF		Statistic	R²	Tolerance	VIF		Statistic	R²	Tolerance	VIF
Farm/Year/Season Interaction	0.991425	0.00857495	116.619		Kidding year	0.983209	0.0167914	59.5543		Lactation stage	0.694537	0.305463	3.27372
Kidding year	0.990032	0.00996767	100.324		Sex	0.980462	0.0195385	51.1811		Kidding month	0.634208	0.365792	2.7338
Sex	0.988234	0.0117658	84.9921		Farm/Year Interaction	0.97503	0.0249698	40.0484		Kidding season	0.628314	0.371686	2.69044
Farm/Year Interaction	0.985963	0.0140374	71.238		Lactation stage	0.698454	0.301546	3.31624		Sex	0.620679	0.379321	2.63629
Lactation stage	0.700876	0.299124	3.34309		Kidding month	0.642675	0.357325	2.79857		Age (in years)	0.540107	0.459893	2.17442
Kidding season	0.674666	0.325334	3.07376		Kidding season	0.628687	0.371313	2.69315		Farm/Year Interaction	0.249483	0.750517	1.33241
Kidding month	0.655098	0.344902	2.89937		Age (in years)	0.542897	0.457103	2.18769		Days in Milk	0.13985	0.86015	1.16259
Age (in years)	0.542897	0.457103	2.18769		Days in Milk	0.387767	0.612233	1.63337		Farm	0.00533391	0.994666	1.00536
Days in Milk	0.466521	0.533479	1.87449		Farm	0.00583279	0.994167	1.00587
Farm	0.00876559	0.991234	1.00884
