# Supplementary material for: Analysis of the Genetic Parameters for Dairy Linear Appraisal and Zoometric Traits: A Tool to Enhance the Applicability of Murciano-Granadina Goats Major Areas Evaluation System
Source: Animals (Basel). 2023 Mar 21;13(6):1114. doi: 10.3390/ani13061114 (PMC10044043; doi:10.3390/ani13061114)
Supplement: Supplementary file 1 [file animals-13-01114-s001.zip › Table S2.xlsx]

## Sheet: Information
Title	Analysis of the Genetic Parameters for Dairy Linear Appraisal and Zoometric Traits: A Tool to Enhance the Applicability of Murciano-Granadina goats Major Areas Evaluation System
Journal	Animals
Authors	Javier Fernández Álvarez, Francisco Javier Navas González, Jose Manuel León Jurado, Carlos Iglesias Pastrana and Juan Vicente Delgado Bermejo
Table S2.	Starting values for convergence iteration of genetic, phenoypic and environmental variates and covariates for zoometric and LAS traits in Murciano-Granadina goats and bucks.
	LinAp: Linear Appraisal
	ZooMeas: Zoometric measurements and degrees
	Diagonal represents genetic, phenotypic and environmental variates, respectively.
	Genetic, phenotypic and environmental covariates are represented over and below the diagonal.

## Sheet: Genotypic (LinAp)
	Stature (Height to withers)	Chest Width	Body Depth	Rump Width	Rump Angle	Angulosity	Bone Quality	Anterior insertion	Rear Insertion Height	Median Suspensor Ligament	Udder width	Udder Depth	Nipple placement	Nipple Diameter	Rear Legs Rear View	Rear Legs Side View	Mobility
Stature (Height to withers)	1.9208	1.0872	0.2808	0.5192	0.0664	0.4408	-0.4576	-0.1216	-0.4344	0.3912	0.4696	0.4296	-0.1448	0.056	-0.304	0.0928	-0.0808
Chest Width	1.0872	1.7184	0.5304	0.6632	0.172	0.7528	-0.3768	0.0064	-0.4256	0.3712	0.5888	0.6064	-0.0784	0.052	-0.0952	0.0024	-0.0568
Body Depth	0.2808	0.5304	1.1248	0.228	0.1856	0.3904	-0.1488	-0.0104	-0.088	0.2432	0.4616	0.2392	-0.044	-0.0424	0.0384	0.2448	0.0848
Rump Width	0.5192	0.6632	0.228	0.632	0.1072	0.3272	-0.248	0.0168	-0.2344	0.1392	0.264	0.252	-0.032	0.0664	0.0568	-0.0512	-0.0536
Rump Angle	0.0664	0.172	0.1856	0.1072	0.6488	0.1784	0.0024	0.068	-0.1072	0.0568	0.068	-0.0208	0.0144	0.0024	0.1056	0.108	0.068
Angulosity	0.4408	0.7528	0.3904	0.3272	0.1784	1.2208	-0.1832	0.1208	-0.2648	0.188	0.2208	0.1632	0.0232	-0.0192	-0.084	0.0448	0.0072
Bone Quality	-0.4576	-0.3768	-0.1488	-0.248	0.0024	-0.1832	0.6688	0.0376	0.2128	-0.0832	-0.0416	-0.0528	0.052	-0.048	0.1256	-0.0312	0.0576
Anterior insertion	-0.1216	0.0064	-0.0104	0.0168	0.068	0.1208	0.0376	0.5264	0.0304	-0.1488	-0.0912	-0.356	0.072	-0.0696	0.0568	-0.0552	0.044
Rear Insertion Height	-0.4344	-0.4256	-0.088	-0.2344	-0.1072	-0.2648	0.2128	0.0304	0.7512	-0.1352	-0.056	-0.1312	0.068	0.02	0.1056	0.0136	0.044
Median Suspensor Ligament	0.3912	0.3712	0.2432	0.1392	0.0568	0.188	-0.0832	-0.1488	-0.1352	1.2224	0.3432	0.6776	0.0976	0.1976	-0.0456	0.1512	-0.0056
Udder width	0.4696	0.5888	0.4616	0.264	0.068	0.2208	-0.0416	-0.0912	-0.056	0.3432	1.188	0.6088	-0.0232	0.0416	0.0512	0.0984	0.0424
Udder Depth	0.4296	0.6064	0.2392	0.252	-0.0208	0.1632	-0.0528	-0.356	-0.1312	0.6776	0.6088	1.8992	-0.1024	0.2152	-0.0624	-0.0296	-0.1416
Nipple placement	-0.1448	-0.0784	-0.044	-0.032	0.0144	0.0232	0.052	0.072	0.068	0.0976	-0.0232	-0.1024	0.5072	0.2032	0.076	0.0024	0.04
Nipple Diameter	0.056	0.052	-0.0424	0.0664	0.0024	-0.0192	-0.048	-0.0696	0.02	0.1976	0.0416	0.2152	0.2032	1.8632	0.0408	-0.048	-0.032
Rear Legs Rear View	-0.304	-0.0952	0.0384	0.0568	0.1056	-0.084	0.1256	0.0568	0.1056	-0.0456	0.0512	-0.0624	0.076	0.0408	0.6136	-0.004	0.1112
Rear Legs Side View	0.0928	0.0024	0.2448	-0.0512	0.108	0.0448	-0.0312	-0.0552	0.0136	0.1512	0.0984	-0.0296	0.0024	-0.048	-0.004	0.6888	0.128
Mobility	-0.0808	-0.0568	0.0848	-0.0536	0.068	0.0072	0.0576	0.044	0.044	-0.0056	0.0424	-0.1416	0.04	-0.032	0.1112	0.128	0.3496

## Sheet: Phenotypic (LinAp)
	Stature (Height to withers)	Chest Width	Body Depth	Rump Width	Rump Angle	Angulosity	Bone Quality	Anterior insertion	Rear Insertion Height	Median Suspensor Ligament	Udder width	Udder Depth	Nipple placement	Nipple Diameter	Rear Legs Rear View	Rear Legs Side View	Mobility
Stature (Height to withers)	2.401	1.359	0.351	0.649	0.083	0.551	-0.572	-0.152	-0.543	0.489	0.587	0.537	-0.181	0.07	-0.38	0.116	-0.101
Chest Width	1.359	2.148	0.663	0.829	0.215	0.941	-0.471	0.008	-0.532	0.464	0.736	0.758	-0.098	0.065	-0.119	0.003	-0.071
Body Depth	0.351	0.663	1.406	0.285	0.232	0.488	-0.186	-0.013	-0.11	0.304	0.577	0.299	-0.055	-0.053	0.048	0.306	0.106
Rump Width	0.649	0.829	0.285	0.79	0.134	0.409	-0.31	0.021	-0.293	0.174	0.33	0.315	-0.04	0.083	0.071	-0.064	-0.067
Rump Angle	0.083	0.215	0.232	0.134	0.811	0.223	0.003	0.085	-0.134	0.071	0.085	-0.026	0.018	0.003	0.132	0.135	0.085
Angulosity	0.551	0.941	0.488	0.409	0.223	1.526	-0.229	0.151	-0.331	0.235	0.276	0.204	0.029	-0.024	-0.105	0.056	0.009
Bone Quality	-0.572	-0.471	-0.186	-0.31	0.003	-0.229	0.836	0.047	0.266	-0.104	-0.052	-0.066	0.065	-0.06	0.157	-0.039	0.072
Anterior insertion	-0.152	0.008	-0.013	0.021	0.085	0.151	0.047	0.658	0.038	-0.186	-0.114	-0.445	0.09	-0.087	0.071	-0.069	0.055
Rear Insertion Height	-0.543	-0.532	-0.11	-0.293	-0.134	-0.331	0.266	0.038	0.939	-0.169	-0.07	-0.164	0.085	0.025	0.132	0.017	0.055
Median Suspensor Ligament	0.489	0.464	0.304	0.174	0.071	0.235	-0.104	-0.186	-0.169	1.528	0.429	0.847	0.122	0.247	-0.057	0.189	-0.007
Udder width	0.587	0.736	0.577	0.33	0.085	0.276	-0.052	-0.114	-0.07	0.429	1.485	0.761	-0.029	0.052	0.064	0.123	0.053
Udder Depth	0.537	0.758	0.299	0.315	-0.026	0.204	-0.066	-0.445	-0.164	0.847	0.761	2.374	-0.128	0.269	-0.078	-0.037	-0.177
Nipple placement	-0.181	-0.098	-0.055	-0.04	0.018	0.029	0.065	0.09	0.085	0.122	-0.029	-0.128	0.634	0.254	0.095	0.003	0.05
Nipple Diameter	0.07	0.065	-0.053	0.083	0.003	-0.024	-0.06	-0.087	0.025	0.247	0.052	0.269	0.254	2.329	0.051	-0.06	-0.04
Rear Legs Rear View	-0.38	-0.119	0.048	0.071	0.132	-0.105	0.157	0.071	0.132	-0.057	0.064	-0.078	0.095	0.051	0.767	-0.005	0.139
Rear Legs Side View	0.116	0.003	0.306	-0.064	0.135	0.056	-0.039	-0.069	0.017	0.189	0.123	-0.037	0.003	-0.06	-0.005	0.861	0.16
Mobility	-0.101	-0.071	0.106	-0.067	0.085	0.009	0.072	0.055	0.055	-0.007	0.053	-0.177	0.05	-0.04	0.139	0.16	0.437
	Rear Legs Rear View
	Rear Legs Side View
	Mobility

## Sheet: Environmental (LinAp)
	Stature (Height to withers)	Chest Width	Body Depth	Rump Width	Rump Angle	Angulosity	Bone Quality	Anterior insertion	Rear Insertion Height	Median Suspensor Ligament	Udder width	Udder Depth	Nipple placement	Nipple Diameter	Rear Legs Rear View	Rear Legs Side View	Mobility
Stature (Height to withers)	0.4802	0.2718	0.0702	0.1298	0.0166	0.1102	-0.1144	-0.0304	-0.1086	0.0978	0.1174	0.1074	-0.0362	0.014	-0.076	0.0232	-0.0202
Chest Width	0.2718	0.4296	0.1326	0.1658	0.043	0.1882	-0.0942	0.0016	-0.1064	0.0928	0.1472	0.1516	-0.0196	0.013	-0.0238	0.0006	-0.0142
Body Depth	0.0702	0.1326	0.2812	0.057	0.0464	0.0976	-0.0372	-0.0026	-0.022	0.0608	0.1154	0.0598	-0.011	-0.0106	0.0096	0.0612	0.0212
Rump Width	0.1298	0.1658	0.057	0.158	0.0268	0.0818	-0.062	0.0042	-0.0586	0.0348	0.066	0.063	-0.008	0.0166	0.0142	-0.0128	-0.0134
Rump Angle	0.0166	0.043	0.0464	0.0268	0.1622	0.0446	0.0006	0.017	-0.0268	0.0142	0.017	-0.0052	0.0036	0.0006	0.0264	0.027	0.017
Angulosity	0.1102	0.1882	0.0976	0.0818	0.0446	0.3052	-0.0458	0.0302	-0.0662	0.047	0.0552	0.0408	0.0058	-0.0048	-0.021	0.0112	0.0018
Bone Quality	-0.1144	-0.0942	-0.0372	-0.062	0.0006	-0.0458	0.1672	0.0094	0.0532	-0.0208	-0.0104	-0.0132	0.013	-0.012	0.0314	-0.0078	0.0144
Anterior insertion	-0.0304	0.0016	-0.0026	0.0042	0.017	0.0302	0.0094	0.1316	0.0076	-0.0372	-0.0228	-0.089	0.018	-0.0174	0.0142	-0.0138	0.011
Rear Insertion Height	-0.1086	-0.1064	-0.022	-0.0586	-0.0268	-0.0662	0.0532	0.0076	0.1878	-0.0338	-0.014	-0.0328	0.017	0.005	0.0264	0.0034	0.011
Median Suspensor Ligament	0.0978	0.0928	0.0608	0.0348	0.0142	0.047	-0.0208	-0.0372	-0.0338	0.3056	0.0858	0.1694	0.0244	0.0494	-0.0114	0.0378	-0.0014
Udder width	0.1174	0.1472	0.1154	0.066	0.017	0.0552	-0.0104	-0.0228	-0.014	0.0858	0.297	0.1522	-0.0058	0.0104	0.0128	0.0246	0.0106
Udder Depth	0.1074	0.1516	0.0598	0.063	-0.0052	0.0408	-0.0132	-0.089	-0.0328	0.1694	0.1522	0.4748	-0.0256	0.0538	-0.0156	-0.0074	-0.0354
Nipple placement	-0.0362	-0.0196	-0.011	-0.008	0.0036	0.0058	0.013	0.018	0.017	0.0244	-0.0058	-0.0256	0.1268	0.0508	0.019	0.0006	0.01
Nipple Diameter	0.014	0.013	-0.0106	0.0166	0.0006	-0.0048	-0.012	-0.0174	0.005	0.0494	0.0104	0.0538	0.0508	0.4658	0.0102	-0.012	-0.008
Rear Legs Rear View	-0.076	-0.0238	0.0096	0.0142	0.0264	-0.021	0.0314	0.0142	0.0264	-0.0114	0.0128	-0.0156	0.019	0.0102	0.1534	-0.001	0.0278
Rear Legs Side View	0.0232	0.0006	0.0612	-0.0128	0.027	0.0112	-0.0078	-0.0138	0.0034	0.0378	0.0246	-0.0074	0.0006	-0.012	-0.001	0.1722	0.032
Mobility	-0.0202	-0.0142	0.0212	-0.0134	0.017	0.0018	0.0144	0.011	0.011	-0.0014	0.0106	-0.0354	0.01	-0.008	0.0278	0.032	0.0874

## Sheet: Genotypic (ZooMeas)
	Stature (Height to withers)	Chest Width	Body Depth	Rump Width	Rump Angle	Angulosity	Bone Quality	Anterior insertion	Rear Insertion Height	Median Suspensor Ligament	Udder width	Udder Depth	Nipple placement	Nipple Diameter	Rear Legs Rear View	Rear Legs Side View	Mobility
Stature (Height to withers)	14.0008	5.4688	0.2944	1.9008	-0.8344	11.2488	-0.9216	-0.2424	0.9088	0.8624	0.3688	2.148	3.28	0.056	-1.492	0.2256	-0.1512
Chest Width	5.4688	3.4232	0.3736	1.0536	-0.6352	8.88	-0.3816	0.0064	0.4424	0.4072	0.2784	1.5152	0.8776	0.0264	-0.6408	0.032	-0.0488
Body Depth	0.2944	0.3736	1.1248	0.1496	-0.4944	4.6112	-0.1488	-0.0104	0.084	0.2656	0.3232	0.5976	0.4872	-0.0216	0.0384	0.2448	0.0848
Rump Width	1.9008	1.0536	0.1496	0.6736	-0.2552	3.94	-0.2464	0.0168	0.2432	0.1488	0.1376	0.6304	0.3544	0.0328	-0.176	-0.0464	-0.0512
Rump Angle	-0.8344	-0.6352	-0.4944	-0.2552	6.0024	-5.68	-0.0064	-0.2072	-0.3384	-0.1848	-0.1248	0.208	0.5032	-0.0032	-0.0864	-0.3536	-0.2136
Angulosity	11.2488	8.88	4.6112	3.94	-5.68	115.343	-1.7496	0.512	2.9248	3.408	2.6344	10.5152	1.9344	-0.1128	-0.6096	0.724	-0.0632
Bone Quality	-0.9216	-0.3816	-0.1488	-0.2464	-0.0064	-1.7496	0.6688	0.0376	-0.2192	-0.0936	-0.0136	-0.1312	-0.5912	-0.024	0.1256	-0.0312	0.0576
Anterior insertion	-0.2424	0.0064	-0.0104	0.0168	-0.2072	0.512	0.0376	0.5264	-0.0344	-0.168	0.0128	-0.8904	-0.8104	-0.0352	0.0568	-0.0552	0.044
Rear Insertion Height	0.9088	0.4424	0.084	0.2432	-0.3384	2.9248	-0.2192	-0.0344	0.812	0.1576	-0.052	0.3424	0.7704	-0.012	-0.1104	-0.0088	-0.0448
Median Suspensor Ligament	0.8624	0.4072	0.2656	0.1488	-0.1848	3.408	-0.0936	-0.168	0.1576	1.452	0.1024	1.8952	-1.2192	0.104	-0.0544	0.1648	-0.0104
Udder width	0.3688	0.2784	0.3232	0.1376	-0.1248	2.6344	-0.0136	0.0128	-0.052	0.1024	0.916	0.4024	-0.684	0.048	0.1112	0.0352	0.084
Udder Depth	2.148	1.5152	0.5976	0.6304	0.208	10.5152	-0.1312	-0.8904	0.3424	1.8952	0.4024	11.868	2.8784	0.2688	-0.156	-0.0728	-0.3552
Nipple placement	3.28	0.8776	0.4872	0.3544	0.5032	1.9344	-0.5912	-0.8104	0.7704	-1.2192	-0.684	2.8784	65.484	-1.1432	-0.8672	-0.036	-0.4512
Nipple Diameter	0.056	0.0264	-0.0216	0.0328	-0.0032	-0.1128	-0.024	-0.0352	-0.012	0.104	0.048	0.2688	-1.1432	0.4656	0.0208	-0.024	-0.016
Rear Legs Rear View	-1.492	-0.6408	0.0384	-0.176	-0.0864	-0.6096	0.1256	0.0568	-0.1104	-0.0544	0.1112	-0.156	-0.8672	0.0208	0.6136	-0.004	0.1112
Rear Legs Side View	0.2256	0.032	0.2448	-0.0464	-0.3536	0.724	-0.0312	-0.0552	-0.0088	0.1648	0.0352	-0.0728	-0.036	-0.024	-0.004	0.6888	0.128
Mobility	-0.1512	-0.0488	0.0848	-0.0512	-0.2136	-0.0632	0.0576	0.044	-0.0448	-0.0104	0.084	-0.3552	-0.4512	-0.016	0.1112	0.128	0.3496

## Sheet: Phenotypic (ZooMeas)
	Stature (Height to withers)	Chest Width	Body Depth	Rump Width	Rump Angle	Angulosity	Bone Quality	Anterior insertion	Rear Insertion Height	Median Suspensor Ligament	Udder width	Udder Depth	Nipple placement	Nipple Diameter	Rear Legs Rear View	Rear Legs Side View	Mobility
Stature (Height to withers)	17.501	6.836	0.368	2.376	-1.043	14.061	-1.152	-0.303	1.136	1.078	0.461	2.685	4.1	0.07	-1.865	0.282	-0.189
Chest Width	6.836	4.279	0.467	1.317	-0.794	11.1	-0.477	0.008	0.553	0.509	0.348	1.894	1.097	0.033	-0.801	0.04	-0.061
Body Depth	0.368	0.467	1.406	0.187	-0.618	5.764	-0.186	-0.013	0.105	0.332	0.404	0.747	0.609	-0.027	0.048	0.306	0.106
Rump Width	2.376	1.317	0.187	0.842	-0.319	4.925	-0.308	0.021	0.304	0.186	0.172	0.788	0.443	0.041	-0.22	-0.058	-0.064
Rump Angle	-1.043	-0.794	-0.618	-0.319	7.503	-7.1	-0.008	-0.259	-0.423	-0.231	-0.156	0.26	0.629	-0.004	-0.108	-0.442	-0.267
Angulosity	14.061	11.1	5.764	4.925	-7.1	144.179	-2.187	0.64	3.656	4.26	3.293	13.144	2.418	-0.141	-0.762	0.905	-0.079
Bone Quality	-1.152	-0.477	-0.186	-0.308	-0.008	-2.187	0.836	0.047	-0.274	-0.117	-0.017	-0.164	-0.739	-0.03	0.157	-0.039	0.072
Anterior insertion	-0.303	0.008	-0.013	0.021	-0.259	0.64	0.047	0.658	-0.043	-0.21	0.016	-1.113	-1.013	-0.044	0.071	-0.069	0.055
Rear Insertion Height	1.136	0.553	0.105	0.304	-0.423	3.656	-0.274	-0.043	1.015	0.197	-0.065	0.428	0.963	-0.015	-0.138	-0.011	-0.056
Median Suspensor Ligament	1.078	0.509	0.332	0.186	-0.231	4.26	-0.117	-0.21	0.197	1.815	0.128	2.369	-1.524	0.13	-0.068	0.206	-0.013
Udder width	0.461	0.348	0.404	0.172	-0.156	3.293	-0.017	0.016	-0.065	0.128	1.145	0.503	-0.855	0.06	0.139	0.044	0.105
Udder Depth	2.685	1.894	0.747	0.788	0.26	13.144	-0.164	-1.113	0.428	2.369	0.503	14.835	3.598	0.336	-0.195	-0.091	-0.444
Nipple placement	4.1	1.097	0.609	0.443	0.629	2.418	-0.739	-1.013	0.963	-1.524	-0.855	3.598	81.855	-1.429	-1.084	-0.045	-0.564
Nipple Diameter	0.07	0.033	-0.027	0.041	-0.004	-0.141	-0.03	-0.044	-0.015	0.13	0.06	0.336	-1.429	0.582	0.026	-0.03	-0.02
Rear Legs Rear View	-1.865	-0.801	0.048	-0.22	-0.108	-0.762	0.157	0.071	-0.138	-0.068	0.139	-0.195	-1.084	0.026	0.767	-0.005	0.139
Rear Legs Side View	0.282	0.04	0.306	-0.058	-0.442	0.905	-0.039	-0.069	-0.011	0.206	0.044	-0.091	-0.045	-0.03	-0.005	0.861	0.16
Mobility	-0.189	-0.061	0.106	-0.064	-0.267	-0.079	0.072	0.055	-0.056	-0.013	0.105	-0.444	-0.564	-0.02	0.139	0.16	0.437

## Sheet: Environmental (ZooMeas)
	Stature (Height to withers)	Chest Width	Body Depth	Rump Width	Rump Angle	Angulosity	Bone Quality	Anterior insertion	Rear Insertion Height	Median Suspensor Ligament	Udder width	Udder Depth	Nipple placement	Nipple Diameter	Rear Legs Rear View	Rear Legs Side View	Mobility
Stature (Height to withers)	3.5002	1.3672	0.0736	0.4752	-0.2086	2.8122	-0.2304	-0.0606	0.2272	0.2156	0.0922	0.537	0.82	0.014	-0.373	0.0564	-0.0378
Chest Width	1.3672	0.8558	0.0934	0.2634	-0.1588	2.22	-0.0954	0.0016	0.1106	0.1018	0.0696	0.3788	0.2194	0.0066	-0.1602	0.008	-0.0122
Body Depth	0.0736	0.0934	0.2812	0.0374	-0.1236	1.1528	-0.0372	-0.0026	0.021	0.0664	0.0808	0.1494	0.1218	-0.0054	0.0096	0.0612	0.0212
Rump Width	0.4752	0.2634	0.0374	0.1684	-0.0638	0.985	-0.0616	0.0042	0.0608	0.0372	0.0344	0.1576	0.0886	0.0082	-0.044	-0.0116	-0.0128
Rump Angle	-0.2086	-0.1588	-0.1236	-0.0638	1.5006	-1.42	-0.0016	-0.0518	-0.0846	-0.0462	-0.0312	0.052	0.1258	-0.0008	-0.0216	-0.0884	-0.0534
Angulosity	2.8122	2.22	1.1528	0.985	-1.42	28.8358	-0.4374	0.128	0.7312	0.852	0.6586	2.6288	0.4836	-0.0282	-0.1524	0.181	-0.0158
Bone Quality	-0.2304	-0.0954	-0.0372	-0.0616	-0.0016	-0.4374	0.1672	0.0094	-0.0548	-0.0234	-0.0034	-0.0328	-0.1478	-0.006	0.0314	-0.0078	0.0144
Anterior insertion	-0.0606	0.0016	-0.0026	0.0042	-0.0518	0.128	0.0094	0.1316	-0.0086	-0.042	0.0032	-0.2226	-0.2026	-0.0088	0.0142	-0.0138	0.011
Rear Insertion Height	0.2272	0.1106	0.021	0.0608	-0.0846	0.7312	-0.0548	-0.0086	0.203	0.0394	-0.013	0.0856	0.1926	-0.003	-0.0276	-0.0022	-0.0112
Median Suspensor Ligament	0.2156	0.1018	0.0664	0.0372	-0.0462	0.852	-0.0234	-0.042	0.0394	0.363	0.0256	0.4738	-0.3048	0.026	-0.0136	0.0412	-0.0026
Udder width	0.0922	0.0696	0.0808	0.0344	-0.0312	0.6586	-0.0034	0.0032	-0.013	0.0256	0.229	0.1006	-0.171	0.012	0.0278	0.0088	0.021
Udder Depth	0.537	0.3788	0.1494	0.1576	0.052	2.6288	-0.0328	-0.2226	0.0856	0.4738	0.1006	2.967	0.7196	0.0672	-0.039	-0.0182	-0.0888
Nipple placement	0.82	0.2194	0.1218	0.0886	0.1258	0.4836	-0.1478	-0.2026	0.1926	-0.3048	-0.171	0.7196	16.371	-0.2858	-0.2168	-0.009	-0.1128
Nipple Diameter	0.014	0.0066	-0.0054	0.0082	-0.0008	-0.0282	-0.006	-0.0088	-0.003	0.026	0.012	0.0672	-0.2858	0.1164	0.0052	-0.006	-0.004
Rear Legs Rear View	-0.373	-0.1602	0.0096	-0.044	-0.0216	-0.1524	0.0314	0.0142	-0.0276	-0.0136	0.0278	-0.039	-0.2168	0.0052	0.1534	-0.001	0.0278
Rear Legs Side View	0.0564	0.008	0.0612	-0.0116	-0.0884	0.181	-0.0078	-0.0138	-0.0022	0.0412	0.0088	-0.0182	-0.009	-0.006	-0.001	0.1722	0.032
Mobility	-0.0378	-0.0122	0.0212	-0.0128	-0.0534	-0.0158	0.0144	0.011	-0.0112	-0.0026	0.021	-0.0888	-0.1128	-0.004	0.0278	0.032	0.0874
