# Supplementary material for: Analysis of the Genetic Parameters for Dairy Linear Appraisal and Zoometric Traits: A Tool to Enhance the Applicability of Murciano-Granadina Goats Major Areas Evaluation System
Source: Animals (Basel). 2023 Mar 21;13(6):1114. doi: 10.3390/ani13061114 (PMC10044043; doi:10.3390/ani13061114)
Supplement: Supplementary file 1 [file animals-13-01114-s001.zip › Table S3.xlsx]

## Sheet: Information
Title	Analysis of the Genetic Parameters for Dairy Linear Appraisal and Zoometric Traits: A Tool to Enhance the Applicability of Murciano-Granadina goats Major Areas Evaluation System
Journal	Animals
Authors	Javier Fernández Álvarez, Francisco Javier Navas González, Jose Manuel León Jurado, Carlos Iglesias Pastrana and Juan Vicente Delgado Bermejo
Table S3.	Fixed Effects and covariates significance and impact within model.

## Sheet: Stature (Height to withers)
Parameter/Fixed Effect/Covariate	Level	Value	Standard error	t	Pr > |t|	Lower bound (95%)	Upper bound (95%)
Intercept	Intercept	82.2839	1.1176	73.6275	< 0,0001	80.0935	84.4744
Age (in years)	Age (in years)	0.2933	0.0114	25.7416	< 0,0001	0.271	0.3157
Days in Milk	Days in Milk	0.0029	0.0002	13.7633	< 0,0001	0.0025	0.0033
Farm	1	-9.3623	1.0782	-8.683	< 0,0001	-11.4757	-7.249
Farm	2	-11.2587	1.1699	-9.6239	< 0,0001	-13.5516	-8.9657
Farm	3	-13.7493	1.2093	-11.3697	< 0,0001	-16.1196	-11.3791
Farm	4	-6.6859	1.0799	-6.1911	< 0,0001	-8.8026	-4.5693
Farm	5	-14.2215	1.1253	-12.6382	< 0,0001	-16.4271	-12.0159
Farm	6	-18.5251	2.5939	-7.1417	< 0,0001	-23.6093	-13.441
Farm	7	-17.0678	1.2326	-13.8472	< 0,0001	-19.4837	-14.6519
Farm	8	-7.6483	1.0773	-7.0995	< 0,0001	-9.7598	-5.5367
Farm	9	-15.5623	1.0873	-14.3128	< 0,0001	-17.6934	-13.4312
Farm	10	-6.526	1.15	-5.6745	< 0,0001	-8.7801	-4.2719
Farm	11	-18.4181	1.959	-9.4017	< 0,0001	-22.2578	-14.5784
Farm	12	-11.4112	2.564	-4.4506	< 0,0001	-16.4366	-6.3858
Farm	13	-4.0546	1.0993	-3.6882	0.0002	-6.2093	-1.8999
Farm	14	-3.7156	1.9598	-1.8959	0.058	-7.5568	0.1257
Farm	15	0.1808	1.305	0.1386	0.8898	-2.377	2.7387
Farm	16	-13.8753	1.15	-12.0653	< 0,0001	-16.1293	-11.6212
Farm	17	-15.7948	1.9975	-7.9072	< 0,0001	-19.71	-11.8796
Farm	18	-4.9351	1.1545	-4.2747	< 0,0001	-7.1979	-2.6723
Farm	19	-1.436	1.3066	-1.0991	0.2718	-3.9969	1.1249
Farm	20	-15.6451	1.3041	-11.997	< 0,0001	-18.2011	-13.089
Farm	21	-13.3022	1.1643	-11.425	< 0,0001	-15.5843	-11.0201
Farm	22	-2.5205	2.564	-0.983	0.3256	-7.5459	2.505
Farm	23	-18.0301	1.1628	-15.5059	< 0,0001	-20.3092	-15.751
Farm	24	-16.2127	1.1586	-13.9928	< 0,0001	-18.4837	-13.9418
Farm	25	-10.6512	1.248	-8.5349	< 0,0001	-13.0972	-8.2052
Farm	26	-2.6536	1.419	-1.8701	0.0615	-5.4348	0.1276
Farm	27	-13.9398	1.9573	-7.122	< 0,0001	-17.7761	-10.1034
Farm	28	-14.7317	1.4166	-10.3992	< 0,0001	-17.5084	-11.9551
Farm	29	-5.9776	1.1549	-5.1758	< 0,0001	-8.2412	-3.7139
Farm	30	-13.899	1.1534	-12.0501	< 0,0001	-16.1598	-11.6382
Farm	31	-4.8229	1.248	-3.8647	0.0001	-7.2689	-2.3769
Farm	32	-10.4861	1.2093	-8.6713	< 0,0001	-12.8564	-8.1159
Farm	33	-2.0324	1.5715	-1.2933	0.1959	-5.1126	1.0477
Farm	34	-10.03	1.3709	-7.3164	< 0,0001	-12.717	-7.3431
Farm	35	-13.9784	1.959	-7.1354	< 0,0001	-17.8181	-10.1387
Farm	36	-16.6437	1.1487	-14.4896	< 0,0001	-18.8951	-14.3923
Farm	37	-5.8074	2.564	-2.2649	0.0235	-10.833	-0.7818
Farm	38	-13.1297	1.2189	-10.7722	< 0,0001	-15.5187	-10.7408
Farm	39	-5.4136	2.564	-2.1114	0.0347	-10.439	-0.3882
Farm	40	-6.8954	1.1275	-6.1155	< 0,0001	-9.1054	-4.6855
Farm	41	-7.1099	1.0801	-6.5824	< 0,0001	-9.227	-4.9928
Farm	42	-13.7555	1.6165	-8.5096	< 0,0001	-16.9238	-10.5872
Farm	43	-4.2639	1.4806	-2.8798	0.004	-7.1659	-1.3618
Farm	44	-4.5981	1.15	-3.9983	< 0,0001	-6.8521	-2.344
Farm	45	-8.1948	1.0859	-7.5464	< 0,0001	-10.3233	-6.0664
Farm	46	-2.2561	1.959	-1.1517	0.2495	-6.0957	1.5836
Farm	47	-3.9506	1.3362	-2.9565	0.0031	-6.5696	-1.3316
Farm	48	-11.3382	1.282	-8.8443	< 0,0001	-13.8509	-8.8255
Farm	49	-13.2579	1.1461	-11.5679	< 0,0001	-15.5043	-11.0116
Farm	50	-4.9952	1.2086	-4.133	< 0,0001	-7.3641	-2.6263
Farm	51	-11.0143	1.0637	-10.3544	< 0,0001	-13.0992	-8.9293
Farm	52	-6.784	1.3723	-4.9436	< 0,0001	-9.4737	-4.0943
Farm	53	-17.6859	1.284	-13.7742	< 0,0001	-20.2026	-15.1693
Farm	54	-10.4049	1.4796	-7.0325	< 0,0001	-13.3049	-7.505
Farm	55	-15.3875	1.3202	-11.6554	< 0,0001	-17.9752	-12.7999
Farm	56	-9.3654	1.1599	-8.0746	< 0,0001	-11.6388	-7.0921
Farm	57	-8.5719	1.1274	-7.6031	< 0,0001	-10.7817	-6.3621
Farm	58	-8.0921	2.564	-3.1561	0.0016	-13.1175	-3.0667
Farm	59	-10.9641	1.1425	-9.5965	< 0,0001	-13.2034	-8.7247
Farm	60	-2.439	1.7104	-1.426	0.1539	-5.7915	0.9134
Farm	61	-5.5943	1.1275	-4.9619	< 0,0001	-7.8041	-3.3845
Farm	62	-5.1933	1.1594	-4.4793	< 0,0001	-7.4657	-2.9209
Farm	63	-11.4547	1.7093	-6.7014	< 0,0001	-14.805	-8.1044
Farm	64	-10.2187	1.3348	-7.6558	< 0,0001	-12.8349	-7.6025
Farm	65	-11.6836	1.2825	-9.1101	< 0,0001	-14.1973	-9.1699
Farm	66	-15.0544	1.1752	-12.8102	< 0,0001	-17.3578	-12.751
Farm	67	-10.6361	1.9593	-5.4286	< 0,0001	-14.4764	-6.7959
Farm	68	-9.7603	1.1474	-8.5067	< 0,0001	-12.0091	-7.5114
Farm	69	-2.9802	2.5641	-1.1623	0.2451	-8.0059	2.0455
Farm	70	-15.0596	1.7522	-8.5947	< 0,0001	-18.4939	-11.6253
Farm	71	-5.6376	1.37	-4.115	< 0,0001	-8.3229	-2.9524
Farm	72	-3.0038	1.4821	-2.0267	0.0427	-5.9088	-0.0988
Farm	73	-14.7898	1.2323	-12.0023	< 0,0001	-17.205	-12.3746
Farm	74	-3.4228	1.5715	-2.178	0.0294	-6.503	-0.3425
Farm	75	-8.8066	2.564	-3.4346	0.0006	-13.8322	-3.781
Farm	76	-17.2233	1.1084	-15.5384	< 0,0001	-19.3959	-15.0508
Farm	77	-2.3895	2.564	-0.932	0.3514	-7.4149	2.6359
Farm	78	-15.2579	1.996	-7.6442	< 0,0001	-19.1701	-11.3457
Farm	79	-10.8026	1.1431	-9.4504	< 0,0001	-13.0431	-8.5621
Farm	80	-14.6275	1.4241	-10.2711	< 0,0001	-17.4188	-11.8361
Farm	81	-13.1593	1.5715	-8.3735	< 0,0001	-16.2396	-10.0791
Farm	82	-13.7265	2.5934	-5.2928	< 0,0001	-18.8097	-8.6433
Farm	83	-2.2722	1.1302	-2.0103	0.0444	-4.4875	-0.0569
Farm	84	-5.1215	1.0936	-4.6831	< 0,0001	-7.265	-2.978
Farm	85	-8.5374	1.1228	-7.6034	< 0,0001	-10.7381	-6.3366
Farm	86	0	0
Sex	Buck	10.9915	0.3798	28.9366	< 0,0001	10.247	11.736
Sex	Doe	0	0
Lactation Stage/Maturity	Primiparous	-1.1415	0.0378	-30.1703	< 0,0001	-1.2156	-1.0673
Lactation Stage/Maturity	Multiparous	0	0
Lactation Stage/Maturity	Buckling	-6.2701	0.1391	-45.0868	< 0,0001	-6.5427	-5.9976
Lactation Stage/Maturity	Buck	0	0
Kidding Month	January	0.0532	0.0756	0.7037	0.4816	-0.095	0.2014
Kidding Month	February	-0.0558	0.0766	-0.7285	0.4663	-0.2058	0.0943
Kidding Month	March	-0.0119	0.0795	-0.1503	0.8806	-0.1677	0.1438
Kidding Month	April	-0.0623	0.0774	-0.805	0.4208	-0.2141	0.0894
Kidding Month	May	-0.0147	0.0823	-0.1787	0.8582	-0.1761	0.1467
Kidding Month	June	0.0517	0.0858	0.6031	0.5465	-0.1164	0.2198
Kidding Month	July	0.108	0.1009	1.0713	0.284	-0.0896	0.3057
Kidding Month	August	0.2119	0.081	2.6168	0.0089	0.0532	0.3706
Kidding Month	September	0.1301	0.0829	1.5699	0.1164	-0.0323	0.2925
Kidding Month	October	0.1868	0.0789	2.3667	0.018	0.0321	0.3415
Kidding Month	November	0.131	0.0739	1.7715	0.0765	-0.0139	0.2759
Kidding Month	December	0	0
Kidding Season	Winter	0	0
Kidding Season	Spring	0	0
Kidding Season	Summer	0	0
Kidding Season	Autumn	0	0
Farm/Kidding Year Interaction	1	-8.5006	1.1445	-7.4272	< 0,0001	-10.7439	-6.2573
Farm/Kidding Year Interaction	2	-13.58	0.9719	-13.9727	< 0,0001	-15.485	-11.6751
Farm/Kidding Year Interaction	3	-12.4702	0.9126	-13.6645	< 0,0001	-14.2589	-10.6815
Farm/Kidding Year Interaction	4	-6.072	0.539	-11.266	< 0,0001	-7.1284	-5.0156
Farm/Kidding Year Interaction	5	-6.1586	0.8759	-7.0314	< 0,0001	-7.8753	-4.4419
Farm/Kidding Year Interaction	6	-5.4651	1.9952	-2.7391	0.0062	-9.3758	-1.5544
Farm/Kidding Year Interaction	7	-7.1248	2.1688	-3.2851	0.001	-11.3757	-2.8739
Farm/Kidding Year Interaction	8	-4.8723	2.401	-2.0293	0.0424	-9.5783	-0.1662
Farm/Kidding Year Interaction	9	-16.6205	2.9166	-5.6986	< 0,0001	-22.3371	-10.9039
Farm/Kidding Year Interaction	10	-6.5426	0.5151	-12.7004	< 0,0001	-7.5523	-5.5329
Farm/Kidding Year Interaction	11	0	0
Farm/Kidding Year Interaction	12	-6.6641	0.7733	-8.6183	< 0,0001	-8.1797	-5.1485
Farm/Kidding Year Interaction	13	-5.9274	2.3917	-2.4783	0.0132	-10.6152	-1.2395
Farm/Kidding Year Interaction	14	-0.6581	1.1443	-0.5751	0.5652	-2.9009	1.5847
Farm/Kidding Year Interaction	15	-9.2607	2.5908	-3.5744	0.0004	-14.3387	-4.1826
Farm/Kidding Year Interaction	16	0	0
Farm/Kidding Year Interaction	17	-7.6032	2.3864	-3.186	0.0014	-12.2807	-2.9258
Farm/Kidding Year Interaction	18	-10.4275	2.4411	-4.2717	< 0,0001	-15.2121	-5.6429
Farm/Kidding Year Interaction	19	-9.1124	2.555	-3.5665	0.0004	-14.1202	-4.1046
Farm/Kidding Year Interaction	20	-6.7433	0.4738	-14.2327	< 0,0001	-7.6719	-5.8146
Farm/Kidding Year Interaction	21	-7.2698	0.8204	-8.8617	< 0,0001	-8.8777	-5.6619
Farm/Kidding Year Interaction	22	-8.6254	0.4865	-17.7296	< 0,0001	-9.579	-7.6719
Farm/Kidding Year Interaction	23	-7.707	2.3915	-3.2227	0.0013	-12.3943	-3.0196
Farm/Kidding Year Interaction	24	-9.1631	0.7076	-12.9502	< 0,0001	-10.55	-7.7763
Farm/Kidding Year Interaction	25	-9.0197	0.6499	-13.8781	< 0,0001	-10.2936	-7.7459
Farm/Kidding Year Interaction	26	-9.9204	0.7431	-13.3502	< 0,0001	-11.3769	-8.4639
Farm/Kidding Year Interaction	27	0.9539	1.6151	0.5906	0.5548	-2.2117	4.1195
Farm/Kidding Year Interaction	28	-8.7629	1.7789	-4.9262	< 0,0001	-12.2495	-5.2763
Farm/Kidding Year Interaction	29	-8.1176	0.5434	-14.9373	< 0,0001	-9.1828	-7.0524
Farm/Kidding Year Interaction	30	-8.8651	0.6975	-12.7107	< 0,0001	-10.2321	-7.4981
Farm/Kidding Year Interaction	31	-9.6691	0.4772	-20.2623	< 0,0001	-10.6044	-8.7338
Farm/Kidding Year Interaction	32	0	0
Farm/Kidding Year Interaction	33	-10.5754	0.6399	-16.5255	< 0,0001	-11.8297	-9.3211
Farm/Kidding Year Interaction	34	-11.9209	1.7245	-6.9128	< 0,0001	-15.3009	-8.5409
Farm/Kidding Year Interaction	35	-10.8124	0.6178	-17.5015	< 0,0001	-12.0233	-9.6015
Farm/Kidding Year Interaction	36	-10.598	0.6366	-16.6467	< 0,0001	-11.8459	-9.3502
Farm/Kidding Year Interaction	37	-16.4845	1.7577	-9.3787	< 0,0001	-19.9295	-13.0394
Farm/Kidding Year Interaction	38	-9.2023	0.5125	-17.9557	< 0,0001	-10.2068	-8.1978
Farm/Kidding Year Interaction	39	-6.4117	1.7243	-3.7185	0.0002	-9.7913	-3.0321
Farm/Kidding Year Interaction	40	-5.406	0.5889	-9.1798	< 0,0001	-6.5602	-4.2517
Farm/Kidding Year Interaction	41	-5.5928	0.7292	-7.6699	< 0,0001	-7.0221	-4.1636
Farm/Kidding Year Interaction	42	-13.1882	0.8852	-14.8978	< 0,0001	-14.9233	-11.4531
Farm/Kidding Year Interaction	43	-9.554	1.8689	-5.112	< 0,0001	-13.2172	-5.8909
Farm/Kidding Year Interaction	44	-7.4727	3.3101	-2.2576	0.024	-13.9605	-0.9848
Farm/Kidding Year Interaction	45	-9.9312	0.6538	-15.1889	< 0,0001	-11.2128	-8.6497
Farm/Kidding Year Interaction	46	-11.3703	1.7674	-6.4333	< 0,0001	-14.8345	-7.9061
Farm/Kidding Year Interaction	47	0.5398	2.8658	0.1884	0.8506	-5.0772	6.1569
Farm/Kidding Year Interaction	48	-9.4002	0.5735	-16.3901	< 0,0001	-10.5243	-8.2761
Farm/Kidding Year Interaction	49	-9.443	0.8816	-10.7116	< 0,0001	-11.1709	-7.7151
Farm/Kidding Year Interaction	50	-4.8519	0.6741	-7.1973	< 0,0001	-6.1732	-3.5306
Farm/Kidding Year Interaction	51	-5.6849	0.6813	-8.3444	< 0,0001	-7.0203	-4.3496
Farm/Kidding Year Interaction	52	-8.3231	0.5033	-16.5357	< 0,0001	-9.3097	-7.3366
Farm/Kidding Year Interaction	53	1.1613	1.3011	0.8925	0.3721	-1.3889	3.7114
Farm/Kidding Year Interaction	54	-9.9551	0.6744	-14.7607	< 0,0001	-11.277	-8.6332
Farm/Kidding Year Interaction	55	-9.8977	0.7226	-13.6981	< 0,0001	-11.314	-8.4815
Farm/Kidding Year Interaction	56	0	0
Farm/Kidding Year Interaction	57	-7.6823	0.5465	-14.0582	< 0,0001	-8.7534	-6.6112
Farm/Kidding Year Interaction	58	-9.7004	0.6098	-15.9075	< 0,0001	-10.8956	-8.5052
Farm/Kidding Year Interaction	59	-9.5561	0.9364	-10.2056	< 0,0001	-11.3914	-7.7208
Farm/Kidding Year Interaction	60	-2.6466	0.7691	-3.4411	0.0006	-4.1541	-1.1391
Farm/Kidding Year Interaction	61	-3.0871	0.7458	-4.1392	< 0,0001	-4.549	-1.6253
Farm/Kidding Year Interaction	62	-2.1956	1.2766	-1.7198	0.0855	-4.6978	0.3066
Farm/Kidding Year Interaction	63	-9.2095	0.4982	-18.4852	< 0,0001	-10.186	-8.233
Farm/Kidding Year Interaction	64	2.3181	1.0749	2.1566	0.031	0.2113	4.4249
Farm/Kidding Year Interaction	65	2.0514	1.0847	1.8912	0.0586	-0.0747	4.1774
Farm/Kidding Year Interaction	66	-9.4648	0.6627	-14.2832	< 0,0001	-10.7637	-8.166
Farm/Kidding Year Interaction	67	0	0
Farm/Kidding Year Interaction	68	-7.9822	0.5452	-14.641	< 0,0001	-9.0508	-6.9136
Farm/Kidding Year Interaction	69	-7.825	0.5177	-15.1139	< 0,0001	-8.8398	-6.8103
Farm/Kidding Year Interaction	70	-9.8982	1.7305	-5.7199	< 0,0001	-13.29	-6.5064
Farm/Kidding Year Interaction	71	-2.2459	1.2473	-1.8007	0.0718	-4.6906	0.1988
Farm/Kidding Year Interaction	72	-2.1424	1.2589	-1.7018	0.0888	-4.61	0.3251
Farm/Kidding Year Interaction	73	-4.0889	2.0633	-1.9817	0.0475	-8.133	-0.0447
Farm/Kidding Year Interaction	74	-8.5902	0.8309	-10.3378	< 0,0001	-10.2189	-6.9615
Farm/Kidding Year Interaction	75	-10.0358	0.7948	-12.6266	< 0,0001	-11.5937	-8.478
Farm/Kidding Year Interaction	76	-9.7305	1.3056	-7.4529	< 0,0001	-12.2895	-7.1715
Farm/Kidding Year Interaction	77	0	0
Farm/Kidding Year Interaction	78	-8.2033	0.5832	-14.0659	< 0,0001	-9.3464	-7.0602
Farm/Kidding Year Interaction	79	-6.498	0.5023	-12.9367	< 0,0001	-7.4825	-5.5135
Farm/Kidding Year Interaction	80	-12.701	1.4227	-8.9274	< 0,0001	-15.4895	-9.9125
Farm/Kidding Year Interaction	81	-13.5096	1.4146	-9.5498	< 0,0001	-16.2823	-10.7369
Farm/Kidding Year Interaction	82	-11.834	2.732	-4.3317	< 0,0001	-17.1887	-6.4792
Farm/Kidding Year Interaction	83	-14.8461	2.1786	-6.8145	< 0,0001	-19.1162	-10.576
Farm/Kidding Year Interaction	84	-4.4843	0.6756	-6.6374	< 0,0001	-5.8086	-3.1601
Farm/Kidding Year Interaction	85	-8.8078	0.6569	-13.4082	< 0,0001	-10.0954	-7.5203
Farm/Kidding Year Interaction	86	0	0
Farm/Kidding Year Interaction	87	-10.4536	2.397	-4.3612	< 0,0001	-15.1517	-5.7555
Farm/Kidding Year Interaction	88	-9.5787	2.4575	-3.8977	< 0,0001	-14.3955	-4.7619
Farm/Kidding Year Interaction	89	-13.7762	0.8812	-15.6333	< 0,0001	-15.5034	-12.049
Farm/Kidding Year Interaction	90	-8.3141	0.6654	-12.4953	< 0,0001	-9.6182	-7.0099
Farm/Kidding Year Interaction	91	-8.5176	0.6676	-12.7582	< 0,0001	-9.8261	-7.209
Farm/Kidding Year Interaction	92	-5.6172	0.4568	-12.2969	< 0,0001	-6.5125	-4.7218
Farm/Kidding Year Interaction	93	-5.0099	0.4361	-11.4892	< 0,0001	-5.8646	-4.1552
Farm/Kidding Year Interaction	94	-8.6245	2.3864	-3.614	0.0003	-13.302	-3.9471
Farm/Kidding Year Interaction	95	-9.2062	1.7129	-5.3745	< 0,0001	-12.5636	-5.8488
Farm/Kidding Year Interaction	96	-15.5254	2.5921	-5.9894	< 0,0001	-20.6061	-10.4447
Farm/Kidding Year Interaction	97	-2.0665	1.5579	-1.3264	0.1847	-5.12	0.987
Farm/Kidding Year Interaction	98	-3.44	0.8326	-4.1317	< 0,0001	-5.0718	-1.8081
Farm/Kidding Year Interaction	99	-12.4778	0.9224	-13.5279	< 0,0001	-14.2857	-10.6699
Farm/Kidding Year Interaction	100	-12.1391	0.9212	-13.1777	< 0,0001	-13.9447	-10.3336
Farm/Kidding Year Interaction	101	-8.8663	0.6584	-13.4675	< 0,0001	-10.1567	-7.576
Farm/Kidding Year Interaction	102	-11.864	1.2427	-9.5466	< 0,0001	-14.2998	-9.4282
Farm/Kidding Year Interaction	103	-12.3257	1.2728	-9.6837	< 0,0001	-14.8205	-9.8309
Farm/Kidding Year Interaction	104	-13.9787	2.6454	-5.2842	< 0,0001	-19.1637	-8.7937
Farm/Kidding Year Interaction	105	-0.6335	0.5091	-1.2443	0.2134	-1.6315	0.3644
Farm/Kidding Year Interaction	106	-0.5474	0.5005	-1.0938	0.274	-1.5284	0.4335
Farm/Kidding Year Interaction	107	0.1852	2.399	0.0772	0.9385	-4.5168	4.8872
Farm/Kidding Year Interaction	108	-2.4661	1.4384	-1.7145	0.0865	-5.2854	0.3532
Farm/Kidding Year Interaction	109	-10.1755	0.5434	-18.7259	< 0,0001	-11.2405	-9.1104
Farm/Kidding Year Interaction	110	-8.9296	0.4739	-18.8434	< 0,0001	-9.8585	-8.0008
Farm/Kidding Year Interaction	111	-13.3645	1.434	-9.3195	< 0,0001	-16.1753	-10.5538
Farm/Kidding Year Interaction	112	-4.4593	0.6572	-6.7849	< 0,0001	-5.7475	-3.1711
Farm/Kidding Year Interaction	113	-1.114	1.2098	-0.9209	0.3571	-3.4852	1.2571
Farm/Kidding Year Interaction	114	-2.4887	0.585	-4.2543	< 0,0001	-3.6353	-1.3421
Farm/Kidding Year Interaction	115	-2.7435	1.0027	-2.7361	0.0062	-4.7088	-0.7782
Farm/Kidding Year Interaction	116	-7.7947	2.3765	-3.2798	0.001	-12.4528	-3.1366
Farm/Kidding Year Interaction	117	-6.7851	3.3304	-2.0373	0.0416	-13.3128	-0.2574
Farm/Kidding Year Interaction	118	-10.4841	0.7331	-14.3017	< 0,0001	-11.921	-9.0473
Farm/Kidding Year Interaction	119	-10.6002	0.8381	-12.6487	< 0,0001	-12.2428	-8.9576
Farm/Kidding Year Interaction	120	-10.994	1.0662	-10.3113	< 0,0001	-13.0838	-8.9042
Farm/Kidding Year Interaction	121	-14.7355	1.2413	-11.8713	< 0,0001	-17.1684	-12.3026
Farm/Kidding Year Interaction	122	-10.2995	1.049	-9.8189	< 0,0001	-12.3555	-8.2436
Farm/Kidding Year Interaction	123	-11.8482	1.1245	-10.5364	< 0,0001	-14.0523	-9.6442
Farm/Kidding Year Interaction	124	-13.0156	1.2003	-10.844	< 0,0001	-15.3682	-10.6631
Farm/Kidding Year Interaction	125	-11.9692	1.9845	-6.0313	< 0,0001	-15.8589	-8.0795
Farm/Kidding Year Interaction	126	-4.5212	1.0511	-4.3014	< 0,0001	-6.5814	-2.461
Farm/Kidding Year Interaction	127	-13.8067	0.9636	-14.3279	< 0,0001	-15.6954	-11.918
Farm/Kidding Year Interaction	128	-7.7502	2.3797	-3.2567	0.0011	-12.4145	-3.0859
Farm/Kidding Year Interaction	129	-2.1124	0.8632	-2.4473	0.0144	-3.8043	-0.4206
Farm/Kidding Year Interaction	130	-2.2198	1.2782	-1.7366	0.0825	-4.7251	0.2855
Farm/Kidding Year Interaction	131	-3.3838	0.8505	-3.9784	< 0,0001	-5.0509	-1.7167
Farm/Kidding Year Interaction	132	-3.9914	0.6654	-5.9987	< 0,0001	-5.2956	-2.6873
Farm/Kidding Year Interaction	133	-9.4354	0.5239	-18.0107	< 0,0001	-10.4623	-8.4086
Farm/Kidding Year Interaction	134	-8.3553	2.728	-3.0628	0.0022	-13.7023	-3.0083
Farm/Kidding Year Interaction	135	-4.6556	0.6606	-7.0471	< 0,0001	-5.9504	-3.3607
Farm/Kidding Year Interaction	136	-12.7657	1.2954	-9.8543	< 0,0001	-15.3048	-10.2266
Farm/Kidding Year Interaction	137	-3.174	0.7794	-4.0723	< 0,0001	-4.7016	-1.6463
Farm/Kidding Year Interaction	138	-6.3876	0.5776	-11.0594	< 0,0001	-7.5196	-5.2555
Farm/Kidding Year Interaction	139	-2.3044	0.8846	-2.6051	0.0092	-4.0382	-0.5706
Farm/Kidding Year Interaction	140	-6.1226	0.7023	-8.7178	< 0,0001	-7.4991	-4.746
Farm/Kidding Year Interaction	141	-10.8588	2.4067	-4.5118	< 0,0001	-15.5761	-6.1415
Farm/Kidding Year Interaction	142	-7.8327	0.7949	-9.8535	< 0,0001	-9.3907	-6.2746
Farm/Kidding Year Interaction	143	-7.9651	0.7123	-11.1816	< 0,0001	-9.3613	-6.5689
Farm/Kidding Year Interaction	144	-11.234	1.0651	-10.5474	< 0,0001	-13.3216	-9.1464
Farm/Kidding Year Interaction	145	-10.8393	1.4817	-7.3152	< 0,0001	-13.7436	-7.9351
Farm/Kidding Year Interaction	146	-12.039	1.1416	-10.5457	< 0,0001	-14.2766	-9.8015
Farm/Kidding Year Interaction	147	-10.3696	0.7246	-14.3108	< 0,0001	-11.7898	-8.9493
Farm/Kidding Year Interaction	148	-8.1856	0.6425	-12.7407	< 0,0001	-9.4449	-6.9263
Farm/Kidding Year Interaction	149	-9.5921	0.6796	-14.1153	< 0,0001	-10.9241	-8.2602
Farm/Kidding Year Interaction	150	-10.685	0.9422	-11.3401	< 0,0001	-12.5318	-8.8382
Farm/Kidding Year Interaction	151	-5.4113	0.6324	-8.5564	< 0,0001	-6.6509	-4.1718
Farm/Kidding Year Interaction	152	-5.3282	0.7147	-7.4553	< 0,0001	-6.729	-3.9274
Farm/Kidding Year Interaction	153	-7.4406	0.5131	-14.5005	< 0,0001	-8.4464	-6.4349
Farm/Kidding Year Interaction	154	-6.316	1.7239	-3.6637	0.0002	-9.6949	-2.9371
Farm/Kidding Year Interaction	155	-6.0149	0.9985	-6.0237	< 0,0001	-7.972	-4.0577
Farm/Kidding Year Interaction	156	1.0378	0.3702	2.8034	0.0051	0.3122	1.7634
Farm/Kidding Year Interaction	157	-9.2891	1.1446	-8.1154	< 0,0001	-11.5325	-7.0456
Farm/Kidding Year Interaction	158	0.291	0.942	0.3089	0.7574	-1.5554	2.1374
Farm/Kidding Year Interaction	159	-15.4569	1.361	-11.3568	< 0,0001	-18.1245	-12.7892
Farm/Kidding Year Interaction	160	-4.5393	1.1285	-4.0225	< 0,0001	-6.7512	-2.3275
Farm/Kidding Year Interaction	161	-6.2197	1.7541	-3.5458	0.0004	-9.6578	-2.7816
Farm/Kidding Year Interaction	162	-3.6483	0.6247	-5.8403	< 0,0001	-4.8727	-2.4239
Farm/Kidding Year Interaction	163	-5.0216	1.0352	-4.8508	< 0,0001	-7.0507	-2.9926
Farm/Kidding Year Interaction	164	-8.6347	2.4243	-3.5618	0.0004	-13.3863	-3.8831
Farm/Kidding Year Interaction	165	-8.0126	0.6641	-12.0646	< 0,0001	-9.3143	-6.7109
Farm/Kidding Year Interaction	166	-8.6682	0.6625	-13.0834	< 0,0001	-9.9668	-7.3696
Farm/Kidding Year Interaction	167	-8.5083	0.6752	-12.6018	< 0,0001	-9.8316	-7.1849
Farm/Kidding Year Interaction	168	-7.2512	0.9893	-7.3299	< 0,0001	-9.1902	-5.3122
Farm/Kidding Year Interaction	169	-6.0698	0.9917	-6.1207	< 0,0001	-8.0135	-4.1261
Farm/Kidding Year Interaction	170	-7.4132	0.9909	-7.4811	< 0,0001	-9.3555	-5.471
Farm/Kidding Year Interaction	171	-6.4674	1.0376	-6.2329	< 0,0001	-8.5012	-4.4337
Farm/Kidding Year Interaction	172	-3.9973	0.6322	-6.3226	< 0,0001	-5.2365	-2.7582
Farm/Kidding Year Interaction	173	-10.2779	0.684	-15.0271	< 0,0001	-11.6184	-8.9373
Farm/Kidding Year Interaction	174	-6.2594	0.9818	-6.3754	< 0,0001	-8.1837	-4.335
Farm/Kidding Year Interaction	175	-4.9116	0.6373	-7.7073	< 0,0001	-6.1607	-3.6626
Farm/Kidding Year Interaction	176	-10.2468	0.6883	-14.8871	< 0,0001	-11.5958	-8.8977
Farm/Kidding Year Interaction	177	-2.4025	0.7644	-3.1429	0.0017	-3.9007	-0.9042
Farm/Kidding Year Interaction	178	-4.8548	0.6381	-7.6079	< 0,0001	-6.1055	-3.604
Farm/Kidding Year Interaction	179	-9.1011	0.4901	-18.5707	< 0,0001	-10.0617	-8.1405
Farm/Kidding Year Interaction	180	-13.3543	1.3016	-10.2597	< 0,0001	-15.9055	-10.8031
Farm/Kidding Year Interaction	181	-7.7672	2.3914	-3.2479	0.0012	-12.4544	-3.08
Farm/Kidding Year Interaction	182	-13.5807	2.5918	-5.2398	< 0,0001	-18.6608	-8.5006
Farm/Kidding Year Interaction	183	1.5237	1.1049	1.379	0.1679	-0.642	3.6894
Farm/Kidding Year Interaction	184	1.5133	1.5589	0.9708	0.3317	-1.5421	4.5688
Farm/Kidding Year Interaction	185	-6.5561	0.6786	-9.6613	< 0,0001	-7.8862	-5.2261
Farm/Kidding Year Interaction	186	-3.4013	0.9443	-3.6021	0.0003	-5.2521	-1.5505
Farm/Kidding Year Interaction	187	0.7329	0.3381	2.1679	0.0302	0.0703	1.3955
Farm/Kidding Year Interaction	188	0.8503	0.4013	2.1188	0.0341	0.0637	1.6369
Farm/Kidding Year Interaction	189	-10.5147	0.7338	-14.33	< 0,0001	-11.9529	-9.0765
Farm/Kidding Year Interaction	190	-6.6524	0.5163	-12.8853	< 0,0001	-7.6643	-5.6404
Farm/Kidding Year Interaction	191	-10.429	1.1556	-9.0248	< 0,0001	-12.694	-8.164
Farm/Kidding Year Interaction	192	-9.5483	0.6911	-13.8163	< 0,0001	-10.9028	-8.1937
Farm/Kidding Year Interaction	193	-9.4834	0.6515	-14.5557	< 0,0001	-10.7604	-8.2064
Farm/Kidding Year Interaction	194	-9.6824	1.4946	-6.4782	< 0,0001	-12.6119	-6.753
Farm/Kidding Year Interaction	195	-2.5297	0.8518	-2.9699	0.003	-4.1992	-0.8602
Farm/Kidding Year Interaction	196	-2.7354	0.9556	-2.8626	0.0042	-4.6083	-0.8624
Farm/Kidding Year Interaction	197	-8.7347	0.4942	-17.6756	< 0,0001	-9.7033	-7.7661
Farm/Kidding Year Interaction	198	-9.2644	1.0015	-9.2501	< 0,0001	-11.2274	-7.3013
Farm/Kidding Year Interaction	199	-4.562	1.4425	-3.1626	0.0016	-7.3894	-1.7347
Farm/Kidding Year Interaction	200	-8.3712	0.5739	-14.5876	< 0,0001	-9.496	-7.2465
Farm/Kidding Year Interaction	201	-7.6579	0.6829	-11.2134	< 0,0001	-8.9965	-6.3194
Farm/Kidding Year Interaction	202	-9.6447	1.0995	-8.7717	< 0,0001	-11.7998	-7.4896
Farm/Kidding Year Interaction	203	1.7373	0.4852	3.5806	0.0003	0.7863	2.6884
Farm/Kidding Year Interaction	204	-6.9802	0.483	-14.4528	< 0,0001	-7.9268	-6.0335
Farm/Kidding Year Interaction	205	-6.5006	3.3303	-1.9519	0.051	-13.0282	0.027
Farm/Kidding Year Interaction	206	-7.3262	0.5057	-14.486	< 0,0001	-8.3174	-6.3349
Farm/Kidding Year Interaction	207	-9.1633	0.8562	-10.7018	< 0,0001	-10.8416	-7.4851
Farm/Kidding Year Interaction	208	0	0
Farm/Kidding Year Interaction	209	-6.0037	0.5873	-10.223	< 0,0001	-7.1548	-4.8526
Farm/Kidding Year Interaction	210	-8.7455	0.6092	-14.3558	< 0,0001	-9.9395	-7.5514
Farm/Kidding Year Interaction	211	-7.9193	1.1964	-6.6192	< 0,0001	-10.2642	-5.5743
Farm/Kidding Year Interaction	212	-9.2454	0.5052	-18.2987	< 0,0001	-10.2357	-8.2551
Farm/Kidding Year Interaction	213	-7.534	1.4307	-5.2661	< 0,0001	-10.3381	-4.7299
Farm/Kidding Year Interaction	214	-1.6412	0.6628	-2.4761	0.0133	-2.9404	-0.3421
Farm/Kidding Year Interaction	215	-1.2506	1.4988	-0.8344	0.4041	-4.1882	1.687
Farm/Kidding Year Interaction	216	-4.3021	2.44	-1.7631	0.0779	-9.0846	0.4805
Farm/Kidding Year Interaction	217	-2.2966	0.6762	-3.3962	0.0007	-3.622	-0.9712
Farm/Kidding Year Interaction	218	-6.8761	2.4323	-2.827	0.0047	-11.6435	-2.1088
Farm/Kidding Year Interaction	219	-2.7326	0.5981	-4.5687	< 0,0001	-3.9049	-1.5603
Farm/Kidding Year Interaction	220	-2.4245	1.1908	-2.0359	0.0418	-4.7585	-0.0904
Farm/Kidding Year Interaction	221	-1.9402	0.5962	-3.2544	0.0011	-3.1088	-0.7717
Farm/Kidding Year Interaction	222	-3.7236	0.6349	-5.8649	< 0,0001	-4.968	-2.4792
Farm/Kidding Year Interaction	223	-5.8469	0.6584	-8.8801	< 0,0001	-7.1374	-4.5564
Farm/Kidding Year Interaction	224	-9.5717	0.529	-18.0953	< 0,0001	-10.6085	-8.5349
Farm/Kidding Year Interaction	225	-9.6454	0.4928	-19.5725	< 0,0001	-10.6114	-8.6795
Farm/Kidding Year Interaction	226	-4.9876	1.1261	-4.4289	< 0,0001	-7.1949	-2.7803
Farm/Kidding Year Interaction	227	-4.495	1.1428	-3.9332	< 0,0001	-6.735	-2.255
Farm/Kidding Year Interaction	228	-7.6285	1.0036	-7.6011	< 0,0001	-9.5956	-5.6614
Farm/Kidding Year Interaction	229	-9.1332	0.625	-14.6131	< 0,0001	-10.3582	-7.9082
Farm/Kidding Year Interaction	230	-3.0372	0.8726	-3.4808	0.0005	-4.7475	-1.327
Farm/Kidding Year Interaction	231	-8.4029	0.5973	-14.0693	< 0,0001	-9.5736	-7.2323
Farm/Kidding Year Interaction	232	-5.1119	0.6502	-7.8623	< 0,0001	-6.3863	-3.8376
Farm/Kidding Year Interaction	233	-4.1734	0.7707	-5.4155	< 0,0001	-5.6839	-2.6629
Farm/Kidding Year Interaction	234	-7.2117	0.4958	-14.5454	< 0,0001	-8.1835	-6.2399
Farm/Kidding Year Interaction	235	0.8776	1.1758	0.7464	0.4554	-1.427	3.1821
Farm/Kidding Year Interaction	236	-4.2984	0.9426	-4.5603	< 0,0001	-6.1459	-2.451
Farm/Kidding Year Interaction	237	-4.3903	0.856	-5.1289	< 0,0001	-6.0681	-2.7125
Farm/Kidding Year Interaction	238	-9.0834	0.6902	-13.1597	< 0,0001	-10.4363	-7.7305
Farm/Kidding Year Interaction	239	-9.086	0.6726	-13.5087	< 0,0001	-10.4043	-7.7676
Farm/Kidding Year Interaction	240	-7.7908	0.561	-13.8864	< 0,0001	-8.8905	-6.6912
Farm/Kidding Year Interaction	241	-8.7359	0.6583	-13.2703	< 0,0001	-10.0262	-7.4456
Farm/Kidding Year Interaction	242	-4.5839	0.4532	-10.1149	< 0,0001	-5.4722	-3.6957
Farm/Kidding Year Interaction	243	-5.7441	0.4349	-13.2077	< 0,0001	-6.5965	-4.8916
Farm/Kidding Year Interaction	244	-10.6231	0.6715	-15.8209	< 0,0001	-11.9392	-9.307
Farm/Kidding Year Interaction	245	-7.934	0.5248	-15.1189	< 0,0001	-8.9626	-6.9055
Farm/Kidding Year Interaction	246	0	0
Farm/Kidding Year Interaction	247	1.1327	0.464	2.441	0.0147	0.2232	2.0421
Farm/Kidding Year Interaction	248	-5.5601	1.0138	-5.4843	< 0,0001	-7.5472	-3.5729
Farm/Kidding Year Interaction	249	-7.0096	0.6914	-10.1389	< 0,0001	-8.3646	-5.6545
Farm/Kidding Year Interaction	250	-10.5804	0.6255	-16.9152	< 0,0001	-11.8064	-9.3544
Farm/Kidding Year Interaction	251	-5.373	0.6227	-8.6287	< 0,0001	-6.5934	-4.1525
Farm/Kidding Year Interaction	252	-4.2359	0.7867	-5.3843	< 0,0001	-5.7779	-2.6939
Farm/Kidding Year Interaction	253	-1.309	0.902	-1.4513	0.1467	-3.0769	0.4589
Farm/Kidding Year Interaction	254	-7.1599	0.5764	-12.4213	< 0,0001	-8.2897	-6.0301
Farm/Kidding Year Interaction	255	-10.0275	0.6594	-15.2071	< 0,0001	-11.32	-8.7351
Farm/Kidding Year Interaction	256	-10.532	1.0387	-10.1396	< 0,0001	-12.5678	-8.4961
Farm/Kidding Year Interaction	257	-2.3907	0.6139	-3.8941	< 0,0001	-3.5939	-1.1874
Farm/Kidding Year Interaction	258	-2.4597	0.7573	-3.2478	0.0012	-3.9441	-0.9753
Farm/Kidding Year Interaction	259	-4.4049	1.488	-2.9602	0.0031	-7.3214	-1.4883
Farm/Kidding Year Interaction	260	-5.2452	2.4308	-2.1578	0.0309	-10.0097	-0.4808
Farm/Kidding Year Interaction	261	-4.4875	0.5751	-7.8034	< 0,0001	-5.6146	-3.3603
Farm/Kidding Year Interaction	262	-4.0793	0.6516	-6.2601	< 0,0001	-5.3565	-2.8021
Farm/Kidding Year Interaction	263	-5.628	1.202	-4.6823	< 0,0001	-7.9838	-3.2721
Farm/Kidding Year Interaction	264	-2.7719	0.745	-3.7209	0.0002	-4.2321	-1.3118
Farm/Kidding Year Interaction	265	-3.674	1.3844	-2.6538	0.008	-6.3875	-0.9605
Farm/Kidding Year Interaction	266	-7.323	0.6293	-11.6372	< 0,0001	-8.5564	-6.0896
Farm/Kidding Year Interaction	267	-11.3733	0.6977	-16.3007	< 0,0001	-12.7409	-10.0058
Farm/Kidding Year Interaction	268	-3.7192	0.6971	-5.3355	< 0,0001	-5.0855	-2.3529
Farm/Kidding Year Interaction	269	-9.4611	0.6751	-14.0151	< 0,0001	-10.7842	-8.1379
Farm/Kidding Year Interaction	270	-9.857	0.505	-19.5189	< 0,0001	-10.8468	-8.8672
Farm/Kidding Year Interaction	271	-7.1923	0.4863	-14.7886	< 0,0001	-8.1455	-6.239
Farm/Kidding Year Interaction	272	-6.113	0.4425	-13.8139	< 0,0001	-6.9803	-5.2456
Farm/Kidding Year Interaction	273	-6.4192	1.4584	-4.4017	< 0,0001	-9.2776	-3.5608
Farm/Kidding Year Interaction	274	-4.9925	0.6308	-7.9145	< 0,0001	-6.2288	-3.7561
Farm/Kidding Year Interaction	275	-5.9031	0.584	-10.1077	< 0,0001	-7.0478	-4.7584
Farm/Kidding Year Interaction	276	-9.4801	0.6282	-15.0901	< 0,0001	-10.7115	-8.2488
Farm/Kidding Year Interaction	277	-6.1063	1.0013	-6.0984	< 0,0001	-8.0689	-4.1437
Farm/Kidding Year Interaction	278	-0.9785	0.5171	-1.8922	0.0585	-1.992	0.0351
Farm/Kidding Year Interaction	279	-0.998	0.5034	-1.9825	0.0474	-1.9847	-0.0113
Farm/Kidding Year Interaction	280	-0.5099	1.4359	-0.3551	0.7225	-3.3242	2.3045
Farm/Kidding Year Interaction	281	-3.6642	2.3945	-1.5303	0.126	-8.3575	1.029
Farm/Kidding Year Interaction	282	-0.5629	1.131	-0.4977	0.6187	-2.7798	1.6539
Farm/Kidding Year Interaction	283	-11.8527	1.1344	-10.448	< 0,0001	-14.0763	-9.6292
Farm/Kidding Year Interaction	284	-9.403	1.9951	-4.7131	< 0,0001	-13.3134	-5.4925
Farm/Kidding Year Interaction	285	-8.6107	0.521	-16.5257	< 0,0001	-9.632	-7.5895
Farm/Kidding Year Interaction	286	-2.4484	0.7499	-3.2648	0.0011	-3.9183	-0.9785
Farm/Kidding Year Interaction	287	-8.2179	1.0755	-7.6413	< 0,0001	-10.3258	-6.1099
Farm/Kidding Year Interaction	288	-9.9942	1.0198	-9.8	< 0,0001	-11.993	-7.9953
Farm/Kidding Year Interaction	289	-9.4639	0.9954	-9.5078	< 0,0001	-11.4149	-7.5129
Farm/Kidding Year Interaction	290	-8.9147	0.5162	-17.2703	< 0,0001	-9.9264	-7.9029
Farm/Kidding Year Interaction	291	-6.3432	1.1422	-5.5534	< 0,0001	-8.5819	-4.1044
Farm/Kidding Year Interaction	292	-4.1874	0.9307	-4.4993	< 0,0001	-6.0115	-2.3632
Farm/Kidding Year Interaction	293	-9.7777	0.6619	-14.7714	< 0,0001	-11.0751	-8.4803
Farm/Kidding Year Interaction	294	-3.5736	0.5841	-6.1183	< 0,0001	-4.7185	-2.4288
Farm/Kidding Year Interaction	295	-7.7212	0.702	-10.9987	< 0,0001	-9.0972	-6.3453
Farm/Kidding Year Interaction	296	-7.7306	0.6992	-11.057	< 0,0001	-9.1009	-6.3602
Farm/Kidding Year Interaction	297	-11.1656	0.7109	-15.7061	< 0,0001	-12.559	-9.7722
Farm/Kidding Year Interaction	298	-4.343	0.8718	-4.9815	< 0,0001	-6.0517	-2.6342
Farm/Kidding Year Interaction	299	-4.28	0.7528	-5.6855	< 0,0001	-5.7555	-2.8045
Farm/Kidding Year Interaction	300	-8.1539	0.5542	-14.7141	< 0,0001	-9.24	-7.0677
Farm/Kidding Year Interaction	301	-6.1984	0.7051	-8.7909	< 0,0001	-7.5804	-4.8164
Farm/Kidding Year Interaction	302	-9.1588	0.693	-13.2169	< 0,0001	-10.5171	-7.8006
Farm/Kidding Year Interaction	303	-8.5122	0.5833	-14.5935	< 0,0001	-9.6555	-7.3689
Farm/Kidding Year Interaction	304	-9.1822	0.4833	-18.998	< 0,0001	-10.1295	-8.2349
Farm/Kidding Year Interaction	305	-9.6188	0.8234	-11.6821	< 0,0001	-11.2327	-8.005
Farm/Kidding Year Interaction	306	-5.8032	0.4383	-13.2414	< 0,0001	-6.6622	-4.9442
Farm/Kidding Year Interaction	307	-4.6701	0.6345	-7.3603	< 0,0001	-5.9137	-3.4265
Farm/Kidding Year Interaction	308	-10.0353	0.6258	-16.0351	< 0,0001	-11.262	-8.8087
Farm/Kidding Year Interaction	309	-8.3601	0.51	-16.392	< 0,0001	-9.3598	-7.3605
Farm/Kidding Year Interaction	310	-11.1584	0.69	-16.1724	< 0,0001	-12.5107	-9.806
Farm/Kidding Year Interaction	311	1.0108	0.6999	1.4442	0.1487	-0.3611	2.3827
Farm/Kidding Year Interaction	312	-7.8886	0.5446	-14.4863	< 0,0001	-8.9559	-6.8212
Farm/Kidding Year Interaction	313	-3.9666	0.7819	-5.0729	< 0,0001	-5.4991	-2.434
Farm/Kidding Year Interaction	314	-5.693	0.5926	-9.6074	< 0,0001	-6.8544	-4.5315
Farm/Kidding Year Interaction	315	-9.9089	0.6033	-16.4255	< 0,0001	-11.0913	-8.7265
Farm/Kidding Year Interaction	316	-2.6896	0.6691	-4.02	< 0,0001	-4.0009	-1.3782
Farm/Kidding Year Interaction	317	1.8784	0.8585	2.188	0.0287	0.1957	3.5612
Farm/Kidding Year Interaction	318	2.2198	0.8548	2.597	0.0094	0.5445	3.8951
Farm/Kidding Year Interaction	319	0.8176	0.7758	1.054	0.2919	-0.7029	2.3382
Farm/Kidding Year Interaction	320	0.7865	0.7887	0.9973	0.3186	-0.7593	2.3323
Farm/Kidding Year Interaction	321	0.9272	1.2195	0.7603	0.4471	-1.463	3.3173
Farm/Kidding Year Interaction	322	-5.3289	1.0084	-5.2845	< 0,0001	-7.3054	-3.3524
Farm/Kidding Year Interaction	323	-10.1259	0.7044	-14.3749	< 0,0001	-11.5066	-8.7452
Farm/Kidding Year Interaction	324	-8.877	0.7358	-12.0647	< 0,0001	-10.3191	-7.4348
Farm/Kidding Year Interaction	325	-8.4293	0.5023	-16.7824	< 0,0001	-9.4137	-7.4448
Farm/Kidding Year Interaction	326	-7.3381	0.4924	-14.9038	< 0,0001	-8.3032	-6.3731
Farm/Kidding Year Interaction	327	-5.2093	0.6802	-7.6583	< 0,0001	-6.5425	-3.876
Farm/Kidding Year Interaction	328	-4.5787	0.9417	-4.8624	< 0,0001	-6.4244	-2.7331
Farm/Kidding Year Interaction	329	-2.8126	0.6337	-4.4382	< 0,0001	-4.0547	-1.5705
Farm/Kidding Year Interaction	330	-3.541	0.6871	-5.1536	< 0,0001	-4.8877	-2.1943
Farm/Kidding Year Interaction	331	-10.2746	0.5035	-20.4061	< 0,0001	-11.2615	-9.2878
Farm/Kidding Year Interaction	332	-6.3918	1.4539	-4.3962	< 0,0001	-9.2415	-3.5421
Farm/Kidding Year Interaction	333	-9.2118	0.6528	-14.1111	< 0,0001	-10.4913	-7.9323
Farm/Kidding Year Interaction	334	-9.1749	0.4818	-19.0419	< 0,0001	-10.1193	-8.2305
Farm/Kidding Year Interaction	335	1.3375	0.4189	3.1929	0.0014	0.5165	2.1586
Farm/Kidding Year Interaction	336	-8.8867	0.9914	-8.964	< 0,0001	-10.8298	-6.9436
Farm/Kidding Year Interaction	337	-7.999	0.6036	-13.2519	< 0,0001	-9.1821	-6.8159
Farm/Kidding Year Interaction	338	-10.1127	0.603	-16.7712	< 0,0001	-11.2945	-8.9308
Farm/Kidding Year Interaction	339	-3.9154	0.9243	-4.2362	< 0,0001	-5.7269	-2.1038
Farm/Kidding Year Interaction	340	-0.5131	1.1612	-0.4418	0.6586	-2.7891	1.763
Farm/Kidding Year Interaction	341	-7.2323	0.6976	-10.3679	< 0,0001	-8.5996	-5.8651
Farm/Kidding Year Interaction	342	-3.269	0.6074	-5.3822	< 0,0001	-4.4594	-2.0785
Farm/Kidding Year Interaction	343	-3.129	0.761	-4.1116	< 0,0001	-4.6207	-1.6374
Farm/Kidding Year Interaction	344	-2.4723	1.0939	-2.2601	0.0238	-4.6163	-0.3282
Farm/Kidding Year Interaction	345	-2.6087	1.7845	-1.4618	0.1438	-6.1063	0.889
Farm/Kidding Year Interaction	346	-2.6481	1.723	-1.5369	0.1243	-6.0252	0.729
Farm/Kidding Year Interaction	347	-1.3573	0.7647	-1.775	0.0759	-2.8561	0.1415
Farm/Kidding Year Interaction	348	-6.6732	0.9673	-6.8987	< 0,0001	-8.5691	-4.7772
Farm/Kidding Year Interaction	349	-4.0903	0.6623	-6.1757	< 0,0001	-5.3884	-2.7921
Farm/Kidding Year Interaction	350	-3.6581	0.9597	-3.8115	0.0001	-5.5392	-1.7769
Farm/Kidding Year Interaction	351	1.5349	0.8791	1.7459	0.0808	-0.1882	3.258
Farm/Kidding Year Interaction	352	1.0481	1.69	0.6202	0.5351	-2.2643	4.3606
Farm/Kidding Year Interaction	353	-6.1528	1.0563	-5.8248	< 0,0001	-8.2232	-4.0824
Farm/Kidding Year Interaction	354	-11.2847	0.8626	-13.0826	< 0,0001	-12.9754	-9.5941
Farm/Kidding Year Interaction	355	-4.1783	0.9152	-4.5656	< 0,0001	-5.9721	-2.3846
Farm/Kidding Year Interaction	356	-5.5131	0.8882	-6.2073	< 0,0001	-7.2539	-3.7723
Farm/Kidding Year Interaction	357	-3.0093	1.2407	-2.4255	0.0153	-5.4411	-0.5775
Farm/Kidding Year Interaction	358	-9.1606	0.5213	-17.5724	< 0,0001	-10.1824	-8.1388
Farm/Kidding Year Interaction	359	-0.3763	1.6782	-0.2242	0.8226	-3.6657	2.9131
Farm/Kidding Year Interaction	360	0	0
Farm/Kidding Year Interaction	361	-6.0174	0.44	-13.677	< 0,0001	-6.8798	-5.1551
Farm/Kidding Year Interaction	362	-3.6214	0.8769	-4.1295	< 0,0001	-5.3402	-1.9025
Farm/Kidding Year Interaction	363	-3.669	0.95	-3.862	0.0001	-5.531	-1.8069
Farm/Kidding Year Interaction	364	-5.5482	0.6637	-8.359	< 0,0001	-6.8491	-4.2472
Farm/Kidding Year Interaction	365	-9.3691	0.5042	-18.5815	< 0,0001	-10.3573	-8.3808
Farm/Kidding Year Interaction	366	-5.9198	1.4597	-4.0556	< 0,0001	-8.7808	-3.0588
Farm/Kidding Year Interaction	367	-4.9139	0.6391	-7.6892	< 0,0001	-6.1664	-3.6613
Farm/Kidding Year Interaction	368	-3.3711	0.6818	-4.9446	< 0,0001	-4.7074	-2.0348
Farm/Kidding Year Interaction	369	-7.3674	0.4964	-14.842	< 0,0001	-8.3403	-6.3945
Farm/Kidding Year Interaction	370	-5.1735	1.1914	-4.3423	< 0,0001	-7.5087	-2.8383
Farm/Kidding Year Interaction	371	-5.9044	0.6227	-9.4818	< 0,0001	-7.1249	-4.6839
Farm/Kidding Year Interaction	372	-0.0249	1.1682	-0.0213	0.983	-2.3145	2.2647
Farm/Kidding Year Interaction	373	-5.2443	0.6062	-8.6515	< 0,0001	-6.4324	-4.0562
Farm/Kidding Year Interaction	374	-9.6054	0.6552	-14.6594	< 0,0001	-10.8897	-8.3211
Farm/Kidding Year Interaction	375	-3.7489	0.6341	-5.9124	< 0,0001	-4.9918	-2.5061
Farm/Kidding Year Interaction	376	-2.8157	0.754	-3.7345	0.0002	-4.2935	-1.3379
Farm/Kidding Year Interaction	377	-7.9761	0.5986	-13.3236	< 0,0001	-9.1494	-6.8027
Farm/Kidding Year Interaction	378	-3.2531	0.6983	-4.6587	< 0,0001	-4.6218	-1.8844
Farm/Kidding Year Interaction	379	-7.0272	0.9409	-7.4684	< 0,0001	-8.8714	-5.1829
Farm/Kidding Year Interaction	380	0	0
Farm/Kidding Year Interaction	381	-9.8122	0.7744	-12.6704	< 0,0001	-11.3301	-8.2943
Farm/Kidding Year Interaction	382	-4.2432	0.9856	-4.3051	< 0,0001	-6.175	-2.3114
Farm/Kidding Year Interaction	383	0	0
Farm/Kidding Year Interaction	384	-6.8529	0.6639	-10.3224	< 0,0001	-8.1541	-5.5516
Farm/Kidding Year Interaction	385	-7.6694	1.0246	-7.4852	< 0,0001	-9.6777	-5.6611
Farm/Kidding Year Interaction	386	-1.3158	1.6873	-0.7798	0.4355	-4.623	1.9914
Farm/Kidding Year Interaction	387	0	0
Farm/Kidding Year Interaction	388	-6.9587	1.7228	-4.0391	< 0,0001	-10.3355	-3.5819
Farm/Kidding Year Interaction	389	-2.8417	0.6171	-4.6045	< 0,0001	-4.0513	-1.6321
Farm/Kidding Year Interaction	390	-1.3318	0.607	-2.1938	0.0283	-2.5216	-0.1419
Farm/Kidding Year Interaction	391	-0.307	0.5527	-0.5555	0.5785	-1.3902	0.7762
Farm/Kidding Year Interaction	392	-12.0598	2.5921	-4.6525	< 0,0001	-17.1403	-6.9792
Farm/Kidding Year Interaction	393	-5.1297	0.7626	-6.7267	< 0,0001	-6.6245	-3.635
Farm/Kidding Year Interaction	394	-9.9788	0.6396	-15.6019	< 0,0001	-11.2324	-8.7252
Farm/Kidding Year Interaction	395	-2.3769	1.8513	-1.2839	0.1992	-6.0054	1.2516
Farm/Kidding Year Interaction	396	0	0
Farm/Kidding Year Interaction	397	-0.7083	0.7897	-0.897	0.3697	-2.2561	0.8394
Farm/Kidding Year Interaction	398	-0.3265	1.7137	-0.1906	0.8489	-3.6854	3.0323
Farm/Kidding Year Interaction	399	1.609	1.8533	0.8682	0.3853	-2.0235	5.2416
Farm/Kidding Year Interaction	400	-7.8306	0.8644	-9.0591	< 0,0001	-9.5248	-6.1363
Farm/Kidding Year Interaction	401	-7.7978	1.2737	-6.1223	< 0,0001	-10.2942	-5.3014
Farm/Kidding Year Interaction	402	-6.429	0.7093	-9.0645	< 0,0001	-7.8191	-5.0388
Farm/Kidding Year Interaction	403	0	0
Farm/Kidding Year Interaction	404	-11.5508	0.6491	-17.7952	< 0,0001	-12.823	-10.2785
Farm/Kidding Year Interaction	405	0	0
Farm/Kidding Year Interaction	406	0	0
Farm/Kidding Year Interaction	407	0	0
Farm/Kidding Year Interaction	408	0	0
Farm/Kidding Year Interaction	409	0	0
Farm/Kidding Year Interaction	410	0	0
Farm/Kidding Year Interaction	411	0	0
Farm/Kidding Year Interaction	412	0	0
Farm/Kidding Year Interaction	413	0	0
Farm/Kidding Year Interaction	414	0	0
Farm/Kidding Year Interaction	415	0	0
Farm/Kidding Year Interaction	416	0	0
Farm/Kidding Year Interaction	417	0	0
Farm/Kidding Year Interaction	418	0	0
Farm/Kidding Year Interaction	419	0	0
Farm/Kidding Year Interaction	420	0	0
Farm/Kidding Year Interaction	421	0	0
Farm/Kidding Year Interaction	422	0	0
Farm/Kidding Year Interaction	423	0	0
Farm/Kidding Year Interaction	424	0	0
Farm/Kidding Year Interaction	425	0	0
Farm/Kidding Year Interaction	426	0	0
Farm/Kidding Year Interaction	427	0	0
Farm/Kidding Year Interaction	428	0	0
Farm/Kidding Year Interaction	429	0	0
Farm/Kidding Year Interaction	430	0	0
Farm/Kidding Year Interaction	431	0	0
Farm/Kidding Year Interaction	432	0	0
Farm/Kidding Year Interaction	433	0	0
Farm/Kidding Year Interaction	434	0	0
Farm/Kidding Year Interaction	435	0	0
Farm/Kidding Year Interaction	436	0	0
Farm/Kidding Year Interaction	437	0	0
Farm/Kidding Year Interaction	438	0	0
Farm/Kidding Year Interaction	439	0	0
Farm/Kidding Year Interaction	440	0	0
Farm/Kidding Year Interaction	441	0	0
Farm/Kidding Year Interaction	442	0	0
Farm/Kidding Year Interaction	443	0	0
Farm/Kidding Year Interaction	444	0	0
Farm/Kidding Year Interaction	445	0	0
Farm/Kidding Year Interaction	446	0	0
Farm/Kidding Year Interaction	447	0	0
Farm/Kidding Year Interaction	448	0	0
Farm/Kidding Year Interaction	449	0	0
Farm/Kidding Year Interaction	450	0	0
Farm/Kidding Year Interaction	451	0	0
Farm/Kidding Year Interaction	452	0	0
Farm/Kidding Year Interaction	453	0	0
Farm/Kidding Year Interaction	454	0	0
Farm/Kidding Year Interaction	455	0	0
Farm/Kidding Year Interaction	456	0	0
Farm/Kidding Year Interaction	457	0	0
Farm/Kidding Year Interaction	458	0	0
Farm/Kidding Year Interaction	459	0	0
Farm/Kidding Year Interaction	460	0	0
Farm/Kidding Year Interaction	461	0	0
Farm/Kidding Year Interaction	462	0	0
Farm/Kidding Year Interaction	463	0	0
Farm/Kidding Year Interaction	464	0	0
Farm/Kidding Year Interaction	465	0	0
Farm/Kidding Year Interaction	466	0	0
Farm/Kidding Year Interaction	467	0	0
Farm/Kidding Year Interaction	468	0	0
Farm/Kidding Year Interaction	469	0	0
Farm/Kidding Year Interaction	470	0	0
Farm/Kidding Year Interaction	471	0	0
Farm/Kidding Year Interaction	472	0	0
Farm/Kidding Year Interaction	473	0	0
Farm/Kidding Year Interaction	474	0	0
Farm/Kidding Year Interaction	475	0	0
Farm/Kidding Year Interaction	476	0	0

## Sheet: Chest Width
Parameter/Fixed Effect/Covariate	Level	Value	Standard error	t	Pr > |t|	Lower bound (95%)	Upper bound (95%)
Intercept	Intercept	25.8629	0.5445	47.5013	< 0,0001	24.7957	26.9301
Age (in years)	Age (in years)	0.1938	0.0056	34.9046	< 0,0001	0.1829	0.2047
Days in Milk	Days in Milk	0.0041	0.0001	39.9343	< 0,0001	0.0039	0.0043
Farm	1	-4.4347	0.5253	-8.4422	< 0,0001	-5.4644	-3.4051
Farm	2	-6.7394	0.5699	-11.8247	< 0,0001	-7.8565	-5.6223
Farm	3	-7.5207	0.5892	-12.7652	< 0,0001	-8.6754	-6.3659
Farm	4	-2.6884	0.5261	-5.1098	< 0,0001	-3.7196	-1.6572
Farm	5	-6.0659	0.5482	-11.0647	< 0,0001	-7.1405	-4.9914
Farm	6	-9.9593	1.2637	-7.8809	< 0,0001	-12.4363	-7.4824
Farm	7	-7.6823	0.6005	-12.7932	< 0,0001	-8.8593	-6.5053
Farm	8	-3.2289	0.5248	-6.152	< 0,0001	-4.2576	-2.2002
Farm	9	-8.2956	0.5297	-15.6603	< 0,0001	-9.3339	-7.2573
Farm	10	-2.8914	0.5603	-5.1605	< 0,0001	-3.9896	-1.7932
Farm	11	-7.4129	0.9544	-7.767	< 0,0001	-9.2836	-5.5422
Farm	12	-3.7386	1.2491	-2.993	0.0028	-6.187	-1.2903
Farm	13	-2.7576	0.5356	-5.1489	< 0,0001	-3.8074	-1.7079
Farm	14	-2.6003	0.9548	-2.7234	0.0065	-4.4717	-0.7289
Farm	15	-0.2847	0.6358	-0.4478	0.6543	-1.5308	0.9615
Farm	16	-7.7449	0.5603	-13.8233	< 0,0001	-8.843	-6.6467
Farm	17	-8.0164	0.9732	-8.2374	< 0,0001	-9.9238	-6.109
Farm	18	-3.1146	0.5624	-5.5376	< 0,0001	-4.217	-2.0122
Farm	19	-1.2135	0.6365	-1.9064	0.0566	-2.4612	0.0341
Farm	20	-6.4549	0.6353	-10.1599	< 0,0001	-7.7002	-5.2097
Farm	21	-6.9917	0.5672	-12.3259	< 0,0001	-8.1035	-5.8799
Farm	22	-1.8108	1.2491	-1.4497	0.1472	-4.2592	0.6375
Farm	23	-7.5449	0.5665	-13.3185	< 0,0001	-8.6553	-6.4346
Farm	24	-7.4137	0.5645	-13.1336	< 0,0001	-8.5201	-6.3073
Farm	25	-7.0669	0.608	-11.6233	< 0,0001	-8.2585	-5.8752
Farm	26	-1.5685	0.6913	-2.2689	0.0233	-2.9234	-0.2135
Farm	27	-5.9815	0.9536	-6.2727	< 0,0001	-7.8505	-4.1125
Farm	28	-6.1774	0.6902	-8.9506	< 0,0001	-7.5301	-4.8247
Farm	29	-2.9107	0.5627	-5.1731	< 0,0001	-4.0135	-1.8079
Farm	30	-6.6431	0.5619	-11.8217	< 0,0001	-7.7445	-5.5417
Farm	31	-1.847	0.608	-3.0378	0.0024	-3.0387	-0.6553
Farm	32	-5.8361	0.5892	-9.9059	< 0,0001	-6.9908	-4.6813
Farm	33	-1.4884	0.7656	-1.9441	0.0519	-2.989	0.0122
Farm	34	-6.5036	0.6679	-9.7376	< 0,0001	-7.8127	-5.1945
Farm	35	-8.4527	0.9544	-8.8565	< 0,0001	-10.3234	-6.5821
Farm	36	-8.0589	0.5596	-14.4008	< 0,0001	-9.1558	-6.9621
Farm	37	-2.0004	1.2492	-1.6014	0.1093	-4.4488	0.448
Farm	38	-7.4425	0.5938	-12.5334	< 0,0001	-8.6064	-6.2786
Farm	39	-1.7402	1.2491	-1.3931	0.1636	-4.1886	0.7081
Farm	40	-3.591	0.5493	-6.5372	< 0,0001	-4.6677	-2.5143
Farm	41	-3.3066	0.5262	-6.2836	< 0,0001	-4.338	-2.2752
Farm	42	-7.5467	0.7875	-9.5829	< 0,0001	-9.0903	-6.0031
Farm	43	-3.5952	0.7213	-4.984	< 0,0001	-5.009	-2.1813
Farm	44	-3.3474	0.5603	-5.9745	< 0,0001	-4.4455	-2.2492
Farm	45	-3.5208	0.5291	-6.6549	< 0,0001	-4.5577	-2.4838
Farm	46	-1.6362	0.9544	-1.7143	0.0865	-3.5068	0.2345
Farm	47	-1.7646	0.651	-2.7107	0.0067	-3.0406	-0.4887
Farm	48	-6.8248	0.6246	-10.9273	< 0,0001	-8.049	-5.6007
Farm	49	-7.3089	0.5584	-13.0897	< 0,0001	-8.4033	-6.2145
Farm	50	-0.6321	0.5888	-1.0735	0.283	-1.7862	0.522
Farm	51	-5.4417	0.5182	-10.5005	< 0,0001	-6.4575	-4.426
Farm	52	-4.3702	0.6686	-6.5367	< 0,0001	-5.6806	-3.0598
Farm	53	-6.922	0.6255	-11.0655	< 0,0001	-8.148	-5.6959
Farm	54	-4.5354	0.7208	-6.292	< 0,0001	-5.9482	-3.1226
Farm	55	-5.6592	0.6432	-8.7986	< 0,0001	-6.9199	-4.3985
Farm	56	-5.4069	0.5651	-9.5684	< 0,0001	-6.5144	-4.2993
Farm	57	-5.8117	0.5493	-10.5807	< 0,0001	-6.8883	-4.7351
Farm	58	-1.5278	1.2491	-1.2231	0.2213	-3.9762	0.9205
Farm	59	-5.8708	0.5566	-10.5474	< 0,0001	-6.9618	-4.7799
Farm	60	-1.757	0.8333	-2.1085	0.035	-3.3903	-0.1237
Farm	61	-3.6481	0.5493	-6.6415	< 0,0001	-4.7247	-2.5715
Farm	62	-2.1422	0.5648	-3.7925	0.0001	-3.2493	-1.0351
Farm	63	-7.5486	0.8328	-9.0647	< 0,0001	-9.1809	-5.9164
Farm	64	-4.8072	0.6503	-7.3924	< 0,0001	-6.0817	-3.5326
Farm	65	-5.8344	0.6248	-9.3378	< 0,0001	-7.0591	-4.6098
Farm	66	-6.8097	0.5725	-11.8939	< 0,0001	-7.9319	-5.6875
Farm	67	-6.2175	0.9545	-6.5136	< 0,0001	-8.0884	-4.3466
Farm	68	-5.0322	0.559	-9.0024	< 0,0001	-6.1278	-3.9366
Farm	69	-2.1145	1.2492	-1.6927	0.0905	-4.563	0.334
Farm	70	-8.8886	0.8536	-10.4125	< 0,0001	-10.5618	-7.2154
Farm	71	-3.5088	0.6675	-5.2569	< 0,0001	-4.817	-2.2005
Farm	72	-2.1301	0.7221	-2.95	0.0032	-3.5454	-0.7148
Farm	73	-7.7786	0.6003	-12.957	< 0,0001	-8.9553	-6.6019
Farm	74	-3.9114	0.7656	-5.1087	< 0,0001	-5.4121	-2.4108
Farm	75	-1.9998	1.2492	-1.6009	0.1094	-4.4483	0.4486
Farm	76	-7.3811	0.54	-13.6683	< 0,0001	-8.4396	-6.3227
Farm	77	-1.7243	1.2491	-1.3804	0.1675	-4.1726	0.724
Farm	78	-6.8466	0.9724	-7.0407	< 0,0001	-8.7525	-4.9406
Farm	79	-5.5987	0.5569	-10.0533	< 0,0001	-6.6902	-4.5071
Farm	80	-7.0466	0.6938	-10.1561	< 0,0001	-8.4065	-5.6867
Farm	81	-5.4025	0.7656	-7.0563	< 0,0001	-6.9032	-3.9019
Farm	82	-8.1187	1.2635	-6.4256	< 0,0001	-10.5952	-5.6423
Farm	83	-2.129	0.5506	-3.8663	0.0001	-3.2082	-1.0497
Farm	84	-2.8641	0.5328	-5.3757	< 0,0001	-3.9084	-1.8198
Farm	85	-4.5115	0.547	-8.2473	< 0,0001	-5.5837	-3.4393
Farm	86	0	0
Sex	Buck	6.2866	0.1851	33.9713	< 0,0001	5.9239	6.6493
Sex	Doe	0	0
Lactation Stage/Maturity	Primiparous	-0.6164	0.0184	-33.4422	< 0,0001	-0.6526	-0.5803
Lactation Stage/Maturity	Multiparous	0	0
Lactation Stage/Maturity	Buckling	-3.0699	0.0678	-45.3106	< 0,0001	-3.2027	-2.9371
Lactation Stage/Maturity	Buck	0	0
Kidding Month	January	-0.1261	0.0368	-3.4217	0.0006	-0.1983	-0.0539
Kidding Month	February	-0.1956	0.0373	-5.2432	< 0,0001	-0.2687	-0.1225
Kidding Month	March	-0.178	0.0387	-4.5991	< 0,0001	-0.2539	-0.1022
Kidding Month	April	-0.0526	0.0377	-1.3944	0.1632	-0.1265	0.0213
Kidding Month	May	-0.0463	0.0401	-1.1538	0.2486	-0.1249	0.0323
Kidding Month	June	0.0326	0.0418	0.7805	0.4351	-0.0493	0.1145
Kidding Month	July	0.1925	0.0491	3.9174	< 0,0001	0.0962	0.2888
Kidding Month	August	0.1908	0.0394	4.8362	< 0,0001	0.1135	0.2681
Kidding Month	September	0.1103	0.0404	2.7319	0.0063	0.0312	0.1894
Kidding Month	October	0.0997	0.0385	2.5923	0.0095	0.0243	0.175
Kidding Month	November	0.0016	0.036	0.044	0.9649	-0.069	0.0722
Kidding Month	December	0	0
Kidding Season	Winter	0	0
Kidding Season	Spring	0	0
Kidding Season	Summer	0	0
Kidding Season	Autumn	0	0
Farm/Kidding Year Interaction	1	-5.3952	0.5576	-9.6758	< 0,0001	-6.4881	-4.3023
Farm/Kidding Year Interaction	2	-8.3651	0.4735	-17.6666	< 0,0001	-9.2932	-7.437
Farm/Kidding Year Interaction	3	-7.6665	0.4446	-17.2434	< 0,0001	-8.538	-6.7951
Farm/Kidding Year Interaction	4	-3.7155	0.2626	-14.15	< 0,0001	-4.2302	-3.2009
Farm/Kidding Year Interaction	5	-4.4991	0.4267	-10.5435	< 0,0001	-5.3354	-3.6627
Farm/Kidding Year Interaction	6	-5.2639	0.9721	-5.4152	< 0,0001	-7.1692	-3.3587
Farm/Kidding Year Interaction	7	-4.7153	1.0566	-4.4626	< 0,0001	-6.7863	-2.6442
Farm/Kidding Year Interaction	8	-6.7941	1.1698	-5.8082	< 0,0001	-9.0869	-4.5014
Farm/Kidding Year Interaction	9	-12.678	1.4209	-8.9224	< 0,0001	-15.4631	-9.893
Farm/Kidding Year Interaction	10	-3.3051	0.251	-13.1691	< 0,0001	-3.797	-2.8132
Farm/Kidding Year Interaction	11	0	0
Farm/Kidding Year Interaction	12	-3.5326	0.3767	-9.3772	< 0,0001	-4.271	-2.7942
Farm/Kidding Year Interaction	13	-5.2637	1.1652	-4.5173	< 0,0001	-7.5476	-2.9798
Farm/Kidding Year Interaction	14	-2.0424	0.5575	-3.6636	0.0002	-3.135	-0.9497
Farm/Kidding Year Interaction	15	-4.6138	1.2622	-3.6553	0.0003	-7.0877	-2.1398
Farm/Kidding Year Interaction	16	0	0
Farm/Kidding Year Interaction	17	-5.1191	1.1626	-4.403	< 0,0001	-7.3979	-2.8403
Farm/Kidding Year Interaction	18	-5.5656	1.1893	-4.6799	< 0,0001	-7.8966	-3.2346
Farm/Kidding Year Interaction	19	-5.795	1.2448	-4.6555	< 0,0001	-8.2348	-3.3553
Farm/Kidding Year Interaction	20	-2.6158	0.2308	-11.3325	< 0,0001	-3.0683	-2.1634
Farm/Kidding Year Interaction	21	-3.4235	0.3997	-8.5657	< 0,0001	-4.2068	-2.6401
Farm/Kidding Year Interaction	22	-4.6524	0.237	-19.6292	< 0,0001	-5.117	-4.1879
Farm/Kidding Year Interaction	23	-6.0978	1.1651	-5.2337	< 0,0001	-8.3814	-3.8142
Farm/Kidding Year Interaction	24	-4.6033	0.3447	-13.3537	< 0,0001	-5.2789	-3.9276
Farm/Kidding Year Interaction	25	-5.0305	0.3166	-15.8873	< 0,0001	-5.6511	-4.4099
Farm/Kidding Year Interaction	26	-5.2252	0.362	-14.4332	< 0,0001	-5.9348	-4.5156
Farm/Kidding Year Interaction	27	1.1668	0.7868	1.4829	0.1381	-0.3754	2.709
Farm/Kidding Year Interaction	28	-6.7509	0.8666	-7.7898	< 0,0001	-8.4496	-5.0523
Farm/Kidding Year Interaction	29	-3.8195	0.2648	-14.4263	< 0,0001	-4.3384	-3.3006
Farm/Kidding Year Interaction	30	-4.4008	0.3398	-12.9515	< 0,0001	-5.0668	-3.7348
Farm/Kidding Year Interaction	31	-4.7926	0.2325	-20.6147	< 0,0001	-5.2482	-4.3369
Farm/Kidding Year Interaction	32	0	0
Farm/Kidding Year Interaction	33	-6.2753	0.3118	-20.1279	< 0,0001	-6.8864	-5.6643
Farm/Kidding Year Interaction	34	-7.154	0.8401	-8.5152	< 0,0001	-8.8007	-5.5073
Farm/Kidding Year Interaction	35	-5.2013	0.301	-17.281	< 0,0001	-5.7913	-4.6114
Farm/Kidding Year Interaction	36	-5.0115	0.3102	-16.1575	< 0,0001	-5.6195	-4.4036
Farm/Kidding Year Interaction	37	-10.4144	0.8563	-12.1619	< 0,0001	-12.0928	-8.736
Farm/Kidding Year Interaction	38	-3.9073	0.2497	-15.6492	< 0,0001	-4.3967	-3.418
Farm/Kidding Year Interaction	39	-4.0635	0.84	-4.8372	< 0,0001	-5.71	-2.417
Farm/Kidding Year Interaction	40	-2.9362	0.2869	-10.2341	< 0,0001	-3.4985	-2.3739
Farm/Kidding Year Interaction	41	-3.4612	0.3553	-9.7429	< 0,0001	-4.1575	-2.7649
Farm/Kidding Year Interaction	42	-6.8612	0.4313	-15.9089	< 0,0001	-7.7066	-6.0159
Farm/Kidding Year Interaction	43	-8.4972	0.9105	-9.3322	< 0,0001	-10.2819	-6.7126
Farm/Kidding Year Interaction	44	-3.9124	1.6126	-2.4261	0.0153	-7.0732	-0.7516
Farm/Kidding Year Interaction	45	-4.4374	0.3185	-13.93	< 0,0001	-5.0617	-3.813
Farm/Kidding Year Interaction	46	-6.2446	0.8611	-7.2522	< 0,0001	-7.9324	-4.5569
Farm/Kidding Year Interaction	47	0.2429	1.3962	0.174	0.8619	-2.4937	2.9795
Farm/Kidding Year Interaction	48	-3.3365	0.2794	-11.9409	< 0,0001	-3.8842	-2.7888
Farm/Kidding Year Interaction	49	-4.1889	0.4295	-9.7532	< 0,0001	-5.0307	-3.3471
Farm/Kidding Year Interaction	50	-1.8811	0.3284	-5.7276	< 0,0001	-2.5248	-1.2374
Farm/Kidding Year Interaction	51	-1.9691	0.3319	-5.9325	< 0,0001	-2.6196	-1.3185
Farm/Kidding Year Interaction	52	-4.1482	0.2452	-16.9159	< 0,0001	-4.6288	-3.6675
Farm/Kidding Year Interaction	53	-0.1126	0.6339	-0.1777	0.859	-1.3551	1.1298
Farm/Kidding Year Interaction	54	-4.939	0.3286	-15.0316	< 0,0001	-5.5831	-4.295
Farm/Kidding Year Interaction	55	-4.3872	0.352	-12.4628	< 0,0001	-5.0772	-3.6973
Farm/Kidding Year Interaction	56	0	0
Farm/Kidding Year Interaction	57	-3.9234	0.2662	-14.7369	< 0,0001	-4.4453	-3.4016
Farm/Kidding Year Interaction	58	-3.8466	0.2971	-12.9478	< 0,0001	-4.4289	-3.2643
Farm/Kidding Year Interaction	59	-4.2622	0.4562	-9.3431	< 0,0001	-5.1563	-3.368
Farm/Kidding Year Interaction	60	-1.3876	0.3747	-3.7033	0.0002	-2.1221	-0.6532
Farm/Kidding Year Interaction	61	-1.1899	0.3634	-3.2747	0.0011	-1.9021	-0.4777
Farm/Kidding Year Interaction	62	-2.3008	0.622	-3.6993	0.0002	-3.5198	-1.0817
Farm/Kidding Year Interaction	63	-4.904	0.2427	-20.2042	< 0,0001	-5.3798	-4.4283
Farm/Kidding Year Interaction	64	-1.8897	0.5237	-3.6085	0.0003	-2.9161	-0.8632
Farm/Kidding Year Interaction	65	-0.5091	0.5284	-0.9634	0.3353	-1.5449	0.5267
Farm/Kidding Year Interaction	66	-5.0995	0.3228	-15.7957	< 0,0001	-5.7322	-4.4667
Farm/Kidding Year Interaction	67	0	0
Farm/Kidding Year Interaction	68	-3.5343	0.2656	-13.3061	< 0,0001	-4.0549	-3.0137
Farm/Kidding Year Interaction	69	-3.427	0.2522	-13.5866	< 0,0001	-3.9214	-2.9326
Farm/Kidding Year Interaction	70	-4.2756	0.8431	-5.0715	< 0,0001	-5.9281	-2.6232
Farm/Kidding Year Interaction	71	-1.7576	0.6077	-2.8924	0.0038	-2.9487	-0.5666
Farm/Kidding Year Interaction	72	-2.069	0.6133	-3.3733	0.0007	-3.2712	-0.8668
Farm/Kidding Year Interaction	73	-4.1148	1.0052	-4.0934	< 0,0001	-6.0851	-2.1446
Farm/Kidding Year Interaction	74	-5.356	0.4048	-13.2302	< 0,0001	-6.1494	-4.5625
Farm/Kidding Year Interaction	75	-5.707	0.3872	-14.7382	< 0,0001	-6.466	-4.948
Farm/Kidding Year Interaction	76	-6.5833	0.6361	-10.3499	< 0,0001	-7.83	-5.3366
Farm/Kidding Year Interaction	77	0	0
Farm/Kidding Year Interaction	78	-3.2323	0.2841	-11.376	< 0,0001	-3.7892	-2.6754
Farm/Kidding Year Interaction	79	-2.857	0.2447	-11.6751	< 0,0001	-3.3367	-2.3774
Farm/Kidding Year Interaction	80	-6.9736	0.6931	-10.0612	< 0,0001	-8.3321	-5.6151
Farm/Kidding Year Interaction	81	-6.8978	0.6892	-10.0085	< 0,0001	-8.2487	-5.547
Farm/Kidding Year Interaction	82	-7.3973	1.331	-5.5578	< 0,0001	-10.0061	-4.7885
Farm/Kidding Year Interaction	83	-10.7224	1.0614	-10.1022	< 0,0001	-12.8028	-8.6421
Farm/Kidding Year Interaction	84	-2.3425	0.3292	-7.1169	< 0,0001	-2.9877	-1.6974
Farm/Kidding Year Interaction	85	-4.6099	0.32	-14.4045	< 0,0001	-5.2372	-3.9827
Farm/Kidding Year Interaction	86	0	0
Farm/Kidding Year Interaction	87	-6.157	1.1678	-5.2724	< 0,0001	-8.4458	-3.8681
Farm/Kidding Year Interaction	88	-6.1617	1.1973	-5.1464	< 0,0001	-8.5084	-3.815
Farm/Kidding Year Interaction	89	-6.6392	0.4293	-15.4646	< 0,0001	-7.4807	-5.7977
Farm/Kidding Year Interaction	90	-3.9494	0.3242	-12.1833	< 0,0001	-4.5848	-3.314
Farm/Kidding Year Interaction	91	-3.6495	0.3253	-11.2202	< 0,0001	-4.287	-3.0119
Farm/Kidding Year Interaction	92	-1.938	0.2225	-8.7081	< 0,0001	-2.3742	-1.5018
Farm/Kidding Year Interaction	93	-1.9689	0.2124	-9.268	< 0,0001	-2.3853	-1.5525
Farm/Kidding Year Interaction	94	-5.1622	1.1626	-4.44	< 0,0001	-7.441	-2.8834
Farm/Kidding Year Interaction	95	-2.8803	0.8345	-3.4514	0.0006	-4.516	-1.2446
Farm/Kidding Year Interaction	96	-9.5221	1.2629	-7.5401	< 0,0001	-11.9973	-7.0469
Farm/Kidding Year Interaction	97	0.4047	0.759	0.5332	0.5939	-1.0829	1.8924
Farm/Kidding Year Interaction	98	0.367	0.4056	0.9048	0.3656	-0.428	1.162
Farm/Kidding Year Interaction	99	-6.7554	0.4494	-15.0329	< 0,0001	-7.6361	-5.8746
Farm/Kidding Year Interaction	100	-6.6365	0.4488	-14.7873	< 0,0001	-7.5161	-5.7568
Farm/Kidding Year Interaction	101	-3.5264	0.3207	-10.9946	< 0,0001	-4.1551	-2.8978
Farm/Kidding Year Interaction	102	-3.188	0.6055	-5.2655	< 0,0001	-4.3747	-2.0013
Farm/Kidding Year Interaction	103	-2.8683	0.6201	-4.6255	< 0,0001	-4.0838	-1.6529
Farm/Kidding Year Interaction	104	-3.2392	1.2888	-2.5133	0.012	-5.7653	-0.7131
Farm/Kidding Year Interaction	105	1.2445	0.248	5.0172	< 0,0001	0.7583	1.7307
Farm/Kidding Year Interaction	106	0.9384	0.2438	3.8488	0.0001	0.4605	1.4163
Farm/Kidding Year Interaction	107	-0.56	1.1687	-0.4792	0.6318	-2.8508	1.7308
Farm/Kidding Year Interaction	108	0.2922	0.7008	0.417	0.6767	-1.0813	1.6658
Farm/Kidding Year Interaction	109	-5.3178	0.2647	-20.0872	< 0,0001	-5.8366	-4.7989
Farm/Kidding Year Interaction	110	-4.254	0.2309	-18.4258	< 0,0001	-4.7065	-3.8015
Farm/Kidding Year Interaction	111	-7.9116	0.6986	-11.3242	< 0,0001	-9.281	-6.5423
Farm/Kidding Year Interaction	112	-1.1633	0.3202	-3.633	0.0003	-1.7909	-0.5357
Farm/Kidding Year Interaction	113	-1.0754	0.5894	-1.8246	0.0681	-2.2306	0.0798
Farm/Kidding Year Interaction	114	-1.5341	0.285	-5.3829	< 0,0001	-2.0927	-0.9755
Farm/Kidding Year Interaction	115	-2.0057	0.4885	-4.1057	< 0,0001	-2.9632	-1.0482
Farm/Kidding Year Interaction	116	-5.7233	1.1578	-4.9431	< 0,0001	-7.9926	-3.4539
Farm/Kidding Year Interaction	117	-4.9101	1.6225	-3.0262	0.0025	-8.0903	-1.7298
Farm/Kidding Year Interaction	118	-6.3158	0.3571	-17.684	< 0,0001	-7.0158	-5.6157
Farm/Kidding Year Interaction	119	-6.6736	0.4083	-16.3453	< 0,0001	-7.4739	-5.8734
Farm/Kidding Year Interaction	120	-5.2178	0.5194	-10.045	< 0,0001	-6.2359	-4.1997
Farm/Kidding Year Interaction	121	-10.3625	0.6047	-17.1355	< 0,0001	-11.5478	-9.1772
Farm/Kidding Year Interaction	122	-5.0016	0.511	-9.787	< 0,0001	-6.0032	-3.9999
Farm/Kidding Year Interaction	123	-7.1447	0.5478	-13.0414	< 0,0001	-8.2185	-6.0709
Farm/Kidding Year Interaction	124	-8.6759	0.5848	-14.8368	< 0,0001	-9.8221	-7.5298
Farm/Kidding Year Interaction	125	-9.7832	0.9668	-10.1188	< 0,0001	-11.6782	-7.8881
Farm/Kidding Year Interaction	126	-2.3528	0.5121	-4.5945	< 0,0001	-3.3565	-1.3491
Farm/Kidding Year Interaction	127	-6.4733	0.4695	-13.7886	< 0,0001	-7.3934	-5.5531
Farm/Kidding Year Interaction	128	-6.1965	1.1594	-5.3447	< 0,0001	-8.4689	-3.9241
Farm/Kidding Year Interaction	129	-1.469	0.4205	-3.4933	0.0005	-2.2933	-0.6448
Farm/Kidding Year Interaction	130	-2.6924	0.6227	-4.3236	< 0,0001	-3.913	-1.4719
Farm/Kidding Year Interaction	131	0.1295	0.4144	0.3124	0.7547	-0.6827	0.9416
Farm/Kidding Year Interaction	132	-1.2981	0.3242	-4.0045	< 0,0001	-1.9335	-0.6628
Farm/Kidding Year Interaction	133	-4.8778	0.2552	-19.1116	< 0,0001	-5.3781	-4.3776
Farm/Kidding Year Interaction	134	-6.1257	1.3291	-4.609	< 0,0001	-8.7307	-3.5207
Farm/Kidding Year Interaction	135	-2.9571	0.3219	-9.1878	< 0,0001	-3.588	-2.3263
Farm/Kidding Year Interaction	136	-4.0589	0.6311	-6.4312	< 0,0001	-5.2959	-2.8219
Farm/Kidding Year Interaction	137	-1.545	0.3797	-4.0687	< 0,0001	-2.2892	-0.8007
Farm/Kidding Year Interaction	138	-2.6053	0.2814	-9.2588	< 0,0001	-3.1568	-2.0538
Farm/Kidding Year Interaction	139	-1.9997	0.431	-4.6402	< 0,0001	-2.8444	-1.155
Farm/Kidding Year Interaction	140	-1.9579	0.3422	-5.7222	< 0,0001	-2.6285	-1.2872
Farm/Kidding Year Interaction	141	-7.1711	1.1725	-6.1159	< 0,0001	-9.4693	-4.8729
Farm/Kidding Year Interaction	142	-2.691	0.3873	-6.9486	< 0,0001	-3.4501	-1.9319
Farm/Kidding Year Interaction	143	-4.3008	0.347	-12.3926	< 0,0001	-4.981	-3.6206
Farm/Kidding Year Interaction	144	-4.9499	0.5189	-9.5391	< 0,0001	-5.9669	-3.9328
Farm/Kidding Year Interaction	145	-6.0805	0.7219	-8.423	< 0,0001	-7.4954	-4.6656
Farm/Kidding Year Interaction	146	-6.8541	0.5562	-12.3235	< 0,0001	-7.9442	-5.764
Farm/Kidding Year Interaction	147	-3.9037	0.353	-11.058	< 0,0001	-4.5956	-3.2117
Farm/Kidding Year Interaction	148	-3.1605	0.313	-10.0972	< 0,0001	-3.774	-2.547
Farm/Kidding Year Interaction	149	-3.2703	0.3311	-9.8779	< 0,0001	-3.9192	-2.6214
Farm/Kidding Year Interaction	150	-4.5633	0.459	-9.9409	< 0,0001	-5.4631	-3.6636
Farm/Kidding Year Interaction	151	-1.7319	0.3081	-5.6209	< 0,0001	-2.3358	-1.128
Farm/Kidding Year Interaction	152	-1.9637	0.3482	-5.6397	< 0,0001	-2.6462	-1.2812
Farm/Kidding Year Interaction	153	-2.9303	0.25	-11.7216	< 0,0001	-3.4203	-2.4403
Farm/Kidding Year Interaction	154	-2.0164	0.8399	-2.4009	0.0164	-3.6626	-0.3703
Farm/Kidding Year Interaction	155	-1.9433	0.4865	-3.9948	< 0,0001	-2.8968	-0.9898
Farm/Kidding Year Interaction	156	0.3949	0.1804	2.1896	0.0286	0.0414	0.7484
Farm/Kidding Year Interaction	157	-3.9575	0.5576	-7.0967	< 0,0001	-5.0504	-2.8645
Farm/Kidding Year Interaction	158	-0.1159	0.4589	-0.2525	0.8007	-1.0154	0.7837
Farm/Kidding Year Interaction	159	-7.037	0.6631	-10.6126	< 0,0001	-8.3366	-5.7373
Farm/Kidding Year Interaction	160	-2.6107	0.5498	-4.7487	< 0,0001	-3.6883	-1.5331
Farm/Kidding Year Interaction	161	-3.2916	0.8546	-3.8516	0.0001	-4.9666	-1.6166
Farm/Kidding Year Interaction	162	-1.7871	0.3043	-5.8723	< 0,0001	-2.3836	-1.1906
Farm/Kidding Year Interaction	163	-2.6892	0.5043	-5.332	< 0,0001	-3.6777	-1.7007
Farm/Kidding Year Interaction	164	-4.1453	1.1811	-3.5098	0.0004	-6.4602	-1.8303
Farm/Kidding Year Interaction	165	-4.6431	0.3236	-14.3501	< 0,0001	-5.2773	-4.0089
Farm/Kidding Year Interaction	166	-4.0805	0.3228	-12.6416	< 0,0001	-4.7131	-3.4478
Farm/Kidding Year Interaction	167	-3.7297	0.3289	-11.3389	< 0,0001	-4.3744	-3.085
Farm/Kidding Year Interaction	168	0.0883	0.482	0.1832	0.8546	-0.8563	1.033
Farm/Kidding Year Interaction	169	-0.0714	0.4831	-0.1479	0.8825	-1.0184	0.8755
Farm/Kidding Year Interaction	170	-3.0145	0.4828	-6.2441	< 0,0001	-3.9607	-2.0682
Farm/Kidding Year Interaction	171	-3.0792	0.5055	-6.0912	< 0,0001	-4.07	-2.0884
Farm/Kidding Year Interaction	172	-1.4565	0.308	-4.7287	< 0,0001	-2.0602	-0.8528
Farm/Kidding Year Interaction	173	-4.1463	0.3332	-12.4431	< 0,0001	-4.7994	-3.4931
Farm/Kidding Year Interaction	174	-2.1637	0.4783	-4.5236	< 0,0001	-3.1012	-1.2262
Farm/Kidding Year Interaction	175	-2.6325	0.3105	-8.4792	< 0,0001	-3.2411	-2.024
Farm/Kidding Year Interaction	176	-4.1542	0.3353	-12.3883	< 0,0001	-4.8114	-3.4969
Farm/Kidding Year Interaction	177	-0.9731	0.3724	-2.6131	0.009	-1.7031	-0.2432
Farm/Kidding Year Interaction	178	-1.1137	0.3109	-3.5824	0.0003	-1.7231	-0.5044
Farm/Kidding Year Interaction	179	-4.0366	0.2388	-16.9065	< 0,0001	-4.5046	-3.5686
Farm/Kidding Year Interaction	180	-6.8583	0.6341	-10.8152	< 0,0001	-8.1012	-5.6154
Farm/Kidding Year Interaction	181	-6.2612	1.1651	-5.3741	< 0,0001	-8.5447	-3.9776
Farm/Kidding Year Interaction	182	-5.76	1.2627	-4.5616	< 0,0001	-8.235	-3.2851
Farm/Kidding Year Interaction	183	-0.66	0.5383	-1.2261	0.2202	-1.7152	0.3951
Farm/Kidding Year Interaction	184	-1.7436	0.7595	-2.2958	0.0217	-3.2322	-0.255
Farm/Kidding Year Interaction	185	-2.6695	0.3306	-8.0746	< 0,0001	-3.3175	-2.0215
Farm/Kidding Year Interaction	186	-1.55	0.46	-3.3693	0.0008	-2.4516	-0.6483
Farm/Kidding Year Interaction	187	0.7515	0.1647	4.5627	< 0,0001	0.4287	1.0743
Farm/Kidding Year Interaction	188	0.9241	0.1955	4.7265	< 0,0001	0.5409	1.3073
Farm/Kidding Year Interaction	189	-3.7829	0.3575	-10.5821	< 0,0001	-4.4835	-3.0822
Farm/Kidding Year Interaction	190	-2.8694	0.2515	-11.4081	< 0,0001	-3.3624	-2.3764
Farm/Kidding Year Interaction	191	-4.1313	0.563	-7.338	< 0,0001	-5.2347	-3.0278
Farm/Kidding Year Interaction	192	-4.4183	0.3367	-13.1229	< 0,0001	-5.0783	-3.7584
Farm/Kidding Year Interaction	193	-4.3666	0.3174	-13.7568	< 0,0001	-4.9888	-3.7445
Farm/Kidding Year Interaction	194	-5.8961	0.7282	-8.0973	< 0,0001	-7.3233	-4.4689
Farm/Kidding Year Interaction	195	-0.1355	0.415	-0.3265	0.744	-0.9489	0.6779
Farm/Kidding Year Interaction	196	-0.4878	0.4655	-1.0477	0.2948	-1.4002	0.4247
Farm/Kidding Year Interaction	197	-4.013	0.2408	-16.6685	< 0,0001	-4.4849	-3.5411
Farm/Kidding Year Interaction	198	-4.2593	0.4879	-8.7292	< 0,0001	-5.2157	-3.3029
Farm/Kidding Year Interaction	199	-2.8376	0.7028	-4.0377	< 0,0001	-4.215	-1.4601
Farm/Kidding Year Interaction	200	-2.9678	0.2796	-10.6152	< 0,0001	-3.5157	-2.4198
Farm/Kidding Year Interaction	201	-3.0343	0.3327	-9.1198	< 0,0001	-3.6864	-2.3822
Farm/Kidding Year Interaction	202	-3.743	0.5357	-6.9874	< 0,0001	-4.7929	-2.693
Farm/Kidding Year Interaction	203	0.9236	0.2364	3.907	< 0,0001	0.4602	1.3869
Farm/Kidding Year Interaction	204	-0.8518	0.2353	-3.6203	0.0003	-1.313	-0.3907
Farm/Kidding Year Interaction	205	-5.1372	1.6225	-3.1662	0.0015	-8.3174	-1.9571
Farm/Kidding Year Interaction	206	-2.6744	0.2464	-10.8541	< 0,0001	-3.1573	-2.1914
Farm/Kidding Year Interaction	207	-3.0369	0.4172	-7.2801	< 0,0001	-3.8546	-2.2193
Farm/Kidding Year Interaction	208	0	0
Farm/Kidding Year Interaction	209	-1.8998	0.2861	-6.6401	< 0,0001	-2.4606	-1.339
Farm/Kidding Year Interaction	210	-2.6191	0.2968	-8.8248	< 0,0001	-3.2008	-2.0374
Farm/Kidding Year Interaction	211	-3.2305	0.5829	-5.5424	< 0,0001	-4.373	-2.0881
Farm/Kidding Year Interaction	212	-4.2859	0.2462	-17.4118	< 0,0001	-4.7684	-3.8035
Farm/Kidding Year Interaction	213	-4.0646	0.697	-5.8316	< 0,0001	-5.4307	-2.6985
Farm/Kidding Year Interaction	214	0.4596	0.3229	1.4232	0.1547	-0.1733	1.0925
Farm/Kidding Year Interaction	215	1.2945	0.7302	1.7729	0.0763	-0.1367	2.7257
Farm/Kidding Year Interaction	216	-2.2343	1.1888	-1.8795	0.0602	-4.5643	0.0957
Farm/Kidding Year Interaction	217	0.0084	0.3294	0.0255	0.9797	-0.6373	0.6541
Farm/Kidding Year Interaction	218	-3.2551	1.185	-2.747	0.006	-5.5777	-0.9325
Farm/Kidding Year Interaction	219	-2.1492	0.2914	-7.3758	< 0,0001	-2.7203	-1.5781
Farm/Kidding Year Interaction	220	-3.8449	0.5802	-6.6272	< 0,0001	-4.982	-2.7077
Farm/Kidding Year Interaction	221	-2.0527	0.2905	-7.0671	< 0,0001	-2.622	-1.4834
Farm/Kidding Year Interaction	222	-1.6287	0.3093	-5.2654	< 0,0001	-2.2349	-1.0224
Farm/Kidding Year Interaction	223	-2.6982	0.3208	-8.4114	< 0,0001	-3.3269	-2.0695
Farm/Kidding Year Interaction	224	-4.3673	0.2577	-16.9471	< 0,0001	-4.8724	-3.8622
Farm/Kidding Year Interaction	225	-4.5857	0.2401	-19.1	< 0,0001	-5.0563	-4.1152
Farm/Kidding Year Interaction	226	-2.6458	0.5486	-4.8224	< 0,0001	-3.7211	-1.5704
Farm/Kidding Year Interaction	227	-2.2861	0.5568	-4.1059	< 0,0001	-3.3773	-1.1948
Farm/Kidding Year Interaction	228	-3.8796	0.4889	-7.9346	< 0,0001	-4.8379	-2.9213
Farm/Kidding Year Interaction	229	-3.7885	0.3045	-12.4419	< 0,0001	-4.3853	-3.1917
Farm/Kidding Year Interaction	230	-1.7275	0.4251	-4.0638	< 0,0001	-2.5607	-0.8943
Farm/Kidding Year Interaction	231	-3.4596	0.291	-11.8895	< 0,0001	-4.0299	-2.8892
Farm/Kidding Year Interaction	232	-1.6054	0.3168	-5.0683	< 0,0001	-2.2263	-0.9846
Farm/Kidding Year Interaction	233	-1.6874	0.3755	-4.4943	< 0,0001	-2.4233	-0.9515
Farm/Kidding Year Interaction	234	-2.8268	0.2416	-11.7028	< 0,0001	-3.3003	-2.3534
Farm/Kidding Year Interaction	235	-0.4307	0.5728	-0.7519	0.4521	-1.5534	0.692
Farm/Kidding Year Interaction	236	-0.0146	0.4592	-0.0317	0.9747	-0.9146	0.8855
Farm/Kidding Year Interaction	237	-0.3053	0.417	-0.732	0.4641	-1.1227	0.5121
Farm/Kidding Year Interaction	238	-4.9692	0.3363	-14.7769	< 0,0001	-5.6283	-4.31
Farm/Kidding Year Interaction	239	-4.3213	0.3277	-13.1875	< 0,0001	-4.9636	-3.6791
Farm/Kidding Year Interaction	240	-3.4772	0.2733	-12.7215	< 0,0001	-4.013	-2.9415
Farm/Kidding Year Interaction	241	-4.5995	0.3207	-14.3412	< 0,0001	-5.2281	-3.9709
Farm/Kidding Year Interaction	242	-2.0983	0.2208	-9.5036	< 0,0001	-2.531	-1.6655
Farm/Kidding Year Interaction	243	-2.5126	0.2119	-11.8586	< 0,0001	-2.9279	-2.0973
Farm/Kidding Year Interaction	244	-4.4605	0.3271	-13.6353	< 0,0001	-5.1016	-3.8193
Farm/Kidding Year Interaction	245	-4.1912	0.2557	-16.3932	< 0,0001	-4.6923	-3.6901
Farm/Kidding Year Interaction	246	0	0
Farm/Kidding Year Interaction	247	0.602	0.2261	2.663	0.0077	0.1589	1.0451
Farm/Kidding Year Interaction	248	-0.9683	0.4939	-1.9604	0.05	-1.9364	-0.0002
Farm/Kidding Year Interaction	249	-3.1917	0.3368	-9.4759	< 0,0001	-3.8519	-2.5315
Farm/Kidding Year Interaction	250	-4.367	0.3047	-14.3306	< 0,0001	-4.9643	-3.7698
Farm/Kidding Year Interaction	251	-2.1345	0.3034	-7.0362	< 0,0001	-2.7291	-1.5399
Farm/Kidding Year Interaction	252	-2.0291	0.3833	-5.2941	< 0,0001	-2.7803	-1.2779
Farm/Kidding Year Interaction	253	-0.2365	0.4394	-0.5383	0.5904	-1.0978	0.6248
Farm/Kidding Year Interaction	254	-3.3131	0.2808	-11.7978	< 0,0001	-3.8635	-2.7627
Farm/Kidding Year Interaction	255	-3.5359	0.3213	-11.0066	< 0,0001	-4.1656	-2.9062
Farm/Kidding Year Interaction	256	-3.7665	0.506	-7.443	< 0,0001	-4.7583	-2.7746
Farm/Kidding Year Interaction	257	0.3477	0.2991	1.1626	0.245	-0.2385	0.934
Farm/Kidding Year Interaction	258	-0.3351	0.369	-0.9083	0.3637	-1.0583	0.388
Farm/Kidding Year Interaction	259	-2.2029	0.7249	-3.0387	0.0024	-3.6238	-0.782
Farm/Kidding Year Interaction	260	-4.2689	1.1843	-3.6047	0.0003	-6.5901	-1.9477
Farm/Kidding Year Interaction	261	-0.9998	0.2802	-3.5687	0.0004	-1.549	-0.4507
Farm/Kidding Year Interaction	262	-1.6255	0.3175	-5.1202	< 0,0001	-2.2478	-1.0033
Farm/Kidding Year Interaction	263	-2.6331	0.5856	-4.4966	< 0,0001	-3.7809	-1.4854
Farm/Kidding Year Interaction	264	0.2723	0.3629	0.7502	0.4531	-0.4391	0.9836
Farm/Kidding Year Interaction	265	-0.379	0.6745	-0.5619	0.5742	-1.701	0.943
Farm/Kidding Year Interaction	266	-2.9978	0.3066	-9.7783	< 0,0001	-3.5987	-2.3969
Farm/Kidding Year Interaction	267	-4.5198	0.3399	-13.2966	< 0,0001	-5.1861	-3.8535
Farm/Kidding Year Interaction	268	-0.1812	0.3396	-0.5336	0.5937	-0.8468	0.4844
Farm/Kidding Year Interaction	269	-4.5	0.3289	-13.6828	< 0,0001	-5.1446	-3.8554
Farm/Kidding Year Interaction	270	-4.444	0.246	-18.0629	< 0,0001	-4.9263	-3.9618
Farm/Kidding Year Interaction	271	-2.6512	0.2369	-11.1895	< 0,0001	-3.1156	-2.1868
Farm/Kidding Year Interaction	272	-2.1548	0.2156	-9.9947	< 0,0001	-2.5773	-1.7322
Farm/Kidding Year Interaction	273	-0.3513	0.7105	-0.4944	0.621	-1.7438	1.0413
Farm/Kidding Year Interaction	274	-2.0152	0.3073	-6.5574	< 0,0001	-2.6175	-1.4128
Farm/Kidding Year Interaction	275	-1.2205	0.2845	-4.2895	< 0,0001	-1.7782	-0.6628
Farm/Kidding Year Interaction	276	-3.8194	0.3061	-12.479	< 0,0001	-4.4193	-3.2195
Farm/Kidding Year Interaction	277	-0.8995	0.4878	-1.844	0.0652	-1.8557	0.0566
Farm/Kidding Year Interaction	278	0.873	0.2519	3.4652	0.0005	0.3792	1.3668
Farm/Kidding Year Interaction	279	0.7499	0.2453	3.0576	0.0022	0.2692	1.2306
Farm/Kidding Year Interaction	280	0.3244	0.6995	0.4637	0.6429	-1.0468	1.6955
Farm/Kidding Year Interaction	281	-2.7643	1.1666	-2.3696	0.0178	-5.0508	-0.4778
Farm/Kidding Year Interaction	282	-0.9044	0.551	-1.6414	0.1007	-1.9845	0.1756
Farm/Kidding Year Interaction	283	-4.2858	0.5527	-7.7545	< 0,0001	-5.3691	-3.2025
Farm/Kidding Year Interaction	284	-4.6816	0.972	-4.8165	< 0,0001	-6.5867	-2.7765
Farm/Kidding Year Interaction	285	-3.6886	0.2538	-14.5305	< 0,0001	-4.1861	-3.191
Farm/Kidding Year Interaction	286	0.5245	0.3654	1.4357	0.1511	-0.1916	1.2406
Farm/Kidding Year Interaction	287	-3.8878	0.524	-7.4202	< 0,0001	-4.9148	-2.8609
Farm/Kidding Year Interaction	288	-2.9307	0.4968	-5.8987	< 0,0001	-3.9046	-1.9569
Farm/Kidding Year Interaction	289	-2.8296	0.4849	-5.8349	< 0,0001	-3.7801	-1.8791
Farm/Kidding Year Interaction	290	-4.2722	0.2515	-16.9882	< 0,0001	-4.7651	-3.7793
Farm/Kidding Year Interaction	291	-2.5491	0.5565	-4.5807	< 0,0001	-3.6398	-1.4584
Farm/Kidding Year Interaction	292	-1.6791	0.4534	-3.7032	0.0002	-2.5678	-0.7904
Farm/Kidding Year Interaction	293	-4.241	0.3225	-13.151	< 0,0001	-4.8731	-3.609
Farm/Kidding Year Interaction	294	-2.0799	0.2846	-7.3092	< 0,0001	-2.6377	-1.5222
Farm/Kidding Year Interaction	295	-2.3331	0.342	-6.8218	< 0,0001	-3.0035	-1.6628
Farm/Kidding Year Interaction	296	-2.206	0.3406	-6.4764	< 0,0001	-2.8736	-1.5384
Farm/Kidding Year Interaction	297	-4.1479	0.3463	-11.9763	< 0,0001	-4.8268	-3.4691
Farm/Kidding Year Interaction	298	-0.1317	0.4247	-0.31	0.7566	-0.9642	0.7008
Farm/Kidding Year Interaction	299	-1.7908	0.3668	-4.8829	< 0,0001	-2.5097	-1.072
Farm/Kidding Year Interaction	300	-2.8775	0.27	-10.6582	< 0,0001	-3.4067	-2.3483
Farm/Kidding Year Interaction	301	-1.6639	0.3435	-4.8436	< 0,0001	-2.3371	-0.9906
Farm/Kidding Year Interaction	302	-4.5149	0.3376	-13.3733	< 0,0001	-5.1766	-3.8532
Farm/Kidding Year Interaction	303	-3.1797	0.2842	-11.1894	< 0,0001	-3.7367	-2.6227
Farm/Kidding Year Interaction	304	-3.9401	0.2355	-16.7327	< 0,0001	-4.4016	-3.4785
Farm/Kidding Year Interaction	305	-4.8144	0.4011	-12.0017	< 0,0001	-5.6006	-4.0281
Farm/Kidding Year Interaction	306	-2.2878	0.2135	-10.7148	< 0,0001	-2.7063	-1.8693
Farm/Kidding Year Interaction	307	-2.0777	0.3091	-6.7215	< 0,0001	-2.6836	-1.4719
Farm/Kidding Year Interaction	308	-3.708	0.3049	-12.1613	< 0,0001	-4.3056	-3.1104
Farm/Kidding Year Interaction	309	-4.5058	0.2485	-18.1339	< 0,0001	-4.9928	-4.0188
Farm/Kidding Year Interaction	310	-4.956	0.3361	-14.7437	< 0,0001	-5.6148	-4.2971
Farm/Kidding Year Interaction	311	0.7333	0.341	2.1505	0.0315	0.065	1.4017
Farm/Kidding Year Interaction	312	-3.1602	0.2653	-11.9119	< 0,0001	-3.6802	-2.6402
Farm/Kidding Year Interaction	313	-1.7459	0.3809	-4.5832	< 0,0001	-2.4925	-0.9993
Farm/Kidding Year Interaction	314	-1.2407	0.2887	-4.2975	< 0,0001	-1.8065	-0.6748
Farm/Kidding Year Interaction	315	-4.115	0.2939	-14.0013	< 0,0001	-4.6911	-3.539
Farm/Kidding Year Interaction	316	-0.2314	0.326	-0.71	0.4777	-0.8703	0.4074
Farm/Kidding Year Interaction	317	0.2771	0.4183	0.6624	0.5077	-0.5428	1.0969
Farm/Kidding Year Interaction	318	0.4417	0.4164	1.0606	0.2889	-0.3745	1.2579
Farm/Kidding Year Interaction	319	0.6375	0.3779	1.6866	0.0917	-0.1033	1.3782
Farm/Kidding Year Interaction	320	0.5203	0.3842	1.3541	0.1757	-0.2328	1.2734
Farm/Kidding Year Interaction	321	-0.4869	0.5941	-0.8196	0.4125	-1.6514	0.6775
Farm/Kidding Year Interaction	322	-0.5107	0.4913	-1.0395	0.2986	-1.4736	0.4522
Farm/Kidding Year Interaction	323	-4.3398	0.3432	-12.6457	< 0,0001	-5.0124	-3.6671
Farm/Kidding Year Interaction	324	-4.3447	0.3585	-12.1202	< 0,0001	-5.0473	-3.6421
Farm/Kidding Year Interaction	325	-3.7534	0.2447	-15.339	< 0,0001	-4.2331	-3.2738
Farm/Kidding Year Interaction	326	-3.008	0.2399	-12.5401	< 0,0001	-3.4782	-2.5379
Farm/Kidding Year Interaction	327	-2.0505	0.3314	-6.1874	< 0,0001	-2.7	-1.4009
Farm/Kidding Year Interaction	328	-0.9082	0.4588	-1.9796	0.0478	-1.8074	-0.009
Farm/Kidding Year Interaction	329	-0.2576	0.3087	-0.8344	0.4041	-0.8628	0.3475
Farm/Kidding Year Interaction	330	0.2953	0.3347	0.8823	0.3776	-0.3608	0.9514
Farm/Kidding Year Interaction	331	-4.7801	0.2453	-19.4863	< 0,0001	-5.2609	-4.2993
Farm/Kidding Year Interaction	332	-0.8009	0.7083	-1.1307	0.2582	-2.1893	0.5874
Farm/Kidding Year Interaction	333	-3.9235	0.318	-12.3364	< 0,0001	-4.5468	-3.3001
Farm/Kidding Year Interaction	334	-4.3846	0.2347	-18.6784	< 0,0001	-4.8447	-3.9245
Farm/Kidding Year Interaction	335	0.4663	0.2041	2.2848	0.0223	0.0663	0.8663
Farm/Kidding Year Interaction	336	-3.3626	0.483	-6.9622	< 0,0001	-4.3093	-2.416
Farm/Kidding Year Interaction	337	-3.3836	0.2941	-11.506	< 0,0001	-3.96	-2.8072
Farm/Kidding Year Interaction	338	-3.91	0.2938	-13.3099	< 0,0001	-4.4858	-3.3342
Farm/Kidding Year Interaction	339	-1.8473	0.4503	-4.1025	< 0,0001	-2.7299	-0.9647
Farm/Kidding Year Interaction	340	-0.9374	0.5657	-1.6569	0.0975	-2.0462	0.1715
Farm/Kidding Year Interaction	341	-2.4359	0.3398	-7.1675	< 0,0001	-3.102	-1.7698
Farm/Kidding Year Interaction	342	-2.057	0.2959	-6.9516	< 0,0001	-2.637	-1.477
Farm/Kidding Year Interaction	343	-0.2129	0.3708	-0.5743	0.5658	-0.9396	0.5138
Farm/Kidding Year Interaction	344	-0.4646	0.5329	-0.8718	0.3833	-1.5092	0.5799
Farm/Kidding Year Interaction	345	0.5715	0.8694	0.6574	0.5109	-1.1325	2.2756
Farm/Kidding Year Interaction	346	0.4374	0.8394	0.5211	0.6023	-1.2079	2.0827
Farm/Kidding Year Interaction	347	0.8392	0.3725	2.2526	0.0243	0.109	1.5694
Farm/Kidding Year Interaction	348	-3.3829	0.4713	-7.1784	< 0,0001	-4.3066	-2.4592
Farm/Kidding Year Interaction	349	-0.367	0.3227	-1.1372	0.2554	-0.9994	0.2655
Farm/Kidding Year Interaction	350	-0.9205	0.4676	-1.9687	0.049	-1.837	-0.0041
Farm/Kidding Year Interaction	351	0.2761	0.4283	0.6445	0.5192	-0.5634	1.1156
Farm/Kidding Year Interaction	352	1.5803	0.8234	1.9193	0.0549	-0.0335	3.1941
Farm/Kidding Year Interaction	353	-0.6904	0.5146	-1.3415	0.1798	-1.6991	0.3183
Farm/Kidding Year Interaction	354	-4.8179	0.4202	-11.4647	< 0,0001	-5.6416	-3.9942
Farm/Kidding Year Interaction	355	-0.3265	0.4459	-0.7324	0.4639	-1.2004	0.5473
Farm/Kidding Year Interaction	356	-0.5612	0.4327	-1.2971	0.1946	-1.4093	0.2869
Farm/Kidding Year Interaction	357	-1.549	0.6044	-2.5627	0.0104	-2.7338	-0.3643
Farm/Kidding Year Interaction	358	-4.2673	0.254	-16.802	< 0,0001	-4.7651	-3.7695
Farm/Kidding Year Interaction	359	1.1039	0.8176	1.3502	0.177	-0.4986	2.7065
Farm/Kidding Year Interaction	360	0	0
Farm/Kidding Year Interaction	361	-1.7528	0.2143	-8.1774	< 0,0001	-2.1729	-1.3327
Farm/Kidding Year Interaction	362	-0.4812	0.4272	-1.1264	0.26	-1.3186	0.3562
Farm/Kidding Year Interaction	363	-0.5166	0.4628	-1.1161	0.2644	-1.4238	0.3906
Farm/Kidding Year Interaction	364	-1.8689	0.3234	-5.7795	< 0,0001	-2.5027	-1.2351
Farm/Kidding Year Interaction	365	-4.4724	0.2456	-18.2066	< 0,0001	-4.9539	-3.9909
Farm/Kidding Year Interaction	366	-0.3125	0.7111	-0.4395	0.6603	-1.7064	1.0813
Farm/Kidding Year Interaction	367	-1.9386	0.3113	-6.2265	< 0,0001	-2.5488	-1.3283
Farm/Kidding Year Interaction	368	-0.3346	0.3321	-1.0074	0.3137	-0.9856	0.3164
Farm/Kidding Year Interaction	369	-2.83	0.2418	-11.7023	< 0,0001	-3.304	-2.356
Farm/Kidding Year Interaction	370	-4.2093	0.5804	-7.2518	< 0,0001	-5.347	-3.0716
Farm/Kidding Year Interaction	371	-2.4273	0.3034	-8.001	< 0,0001	-3.0219	-1.8327
Farm/Kidding Year Interaction	372	-0.001	0.5691	-0.0017	0.9986	-1.1165	1.1145
Farm/Kidding Year Interaction	373	-0.9246	0.2953	-3.1308	0.0017	-1.5034	-0.3457
Farm/Kidding Year Interaction	374	-3.823	0.3192	-11.9759	< 0,0001	-4.4487	-3.1973
Farm/Kidding Year Interaction	375	-0.0894	0.3089	-0.2894	0.7723	-0.6949	0.5161
Farm/Kidding Year Interaction	376	0.2028	0.3673	0.552	0.581	-0.5172	0.9227
Farm/Kidding Year Interaction	377	-3.3512	0.2917	-11.4905	< 0,0001	-3.9229	-2.7796
Farm/Kidding Year Interaction	378	0.0699	0.3402	0.2056	0.8371	-0.5969	0.7367
Farm/Kidding Year Interaction	379	-3.0453	0.4584	-6.6432	< 0,0001	-3.9437	-2.1468
Farm/Kidding Year Interaction	380	0	0
Farm/Kidding Year Interaction	381	-5.0204	0.3773	-13.3065	< 0,0001	-5.7599	-4.2809
Farm/Kidding Year Interaction	382	-1.6191	0.4802	-3.3718	0.0007	-2.5603	-0.6779
Farm/Kidding Year Interaction	383	0	0
Farm/Kidding Year Interaction	384	-2.1774	0.3234	-6.732	< 0,0001	-2.8113	-1.5434
Farm/Kidding Year Interaction	385	-2.0893	0.4992	-4.1855	< 0,0001	-3.0677	-1.1109
Farm/Kidding Year Interaction	386	0.1466	0.822	0.1783	0.8585	-1.4646	1.7578
Farm/Kidding Year Interaction	387	0	0
Farm/Kidding Year Interaction	388	-2.5324	0.8393	-3.0171	0.0026	-4.1775	-0.8872
Farm/Kidding Year Interaction	389	-1.7712	0.3007	-5.8909	< 0,0001	-2.3605	-1.1819
Farm/Kidding Year Interaction	390	0.4792	0.2957	1.6202	0.1052	-0.1005	1.0588
Farm/Kidding Year Interaction	391	0.8088	0.2692	3.0041	0.0027	0.2811	1.3366
Farm/Kidding Year Interaction	392	-5.2301	1.2628	-4.1415	< 0,0001	-7.7053	-2.7549
Farm/Kidding Year Interaction	393	-1.5501	0.3715	-4.1722	< 0,0001	-2.2783	-0.8219
Farm/Kidding Year Interaction	394	-3.7673	0.3116	-12.0902	< 0,0001	-4.378	-3.1566
Farm/Kidding Year Interaction	395	0.3609	0.9019	0.4002	0.689	-1.4068	2.1287
Farm/Kidding Year Interaction	396	0	0
Farm/Kidding Year Interaction	397	1.2762	0.3847	3.3173	0.0009	0.5222	2.0303
Farm/Kidding Year Interaction	398	-0.539	0.8349	-0.6456	0.5185	-2.1755	1.0974
Farm/Kidding Year Interaction	399	-0.0541	0.9029	-0.0599	0.9523	-1.8238	1.7157
Farm/Kidding Year Interaction	400	-3.0059	0.4211	-7.1378	< 0,0001	-3.8313	-2.1805
Farm/Kidding Year Interaction	401	-3.3835	0.6205	-5.4527	< 0,0001	-4.5997	-2.1673
Farm/Kidding Year Interaction	402	-2.1916	0.3455	-6.3424	< 0,0001	-2.8688	-1.5143
Farm/Kidding Year Interaction	403	0	0
Farm/Kidding Year Interaction	404	-5.049	0.3162	-15.9662	< 0,0001	-5.6688	-4.4292
Farm/Kidding Year Interaction	405	0	0
Farm/Kidding Year Interaction	406	0	0
Farm/Kidding Year Interaction	407	0	0
Farm/Kidding Year Interaction	408	0	0
Farm/Kidding Year Interaction	409	0	0
Farm/Kidding Year Interaction	410	0	0
Farm/Kidding Year Interaction	411	0	0
Farm/Kidding Year Interaction	412	0	0
Farm/Kidding Year Interaction	413	0	0
Farm/Kidding Year Interaction	414	0	0
Farm/Kidding Year Interaction	415	0	0
Farm/Kidding Year Interaction	416	0	0
Farm/Kidding Year Interaction	417	0	0
Farm/Kidding Year Interaction	418	0	0
Farm/Kidding Year Interaction	419	0	0
Farm/Kidding Year Interaction	420	0	0
Farm/Kidding Year Interaction	421	0	0
Farm/Kidding Year Interaction	422	0	0
Farm/Kidding Year Interaction	423	0	0
Farm/Kidding Year Interaction	424	0	0
Farm/Kidding Year Interaction	425	0	0
Farm/Kidding Year Interaction	426	0	0
Farm/Kidding Year Interaction	427	0	0
Farm/Kidding Year Interaction	428	0	0
Farm/Kidding Year Interaction	429	0	0
Farm/Kidding Year Interaction	430	0	0
Farm/Kidding Year Interaction	431	0	0
Farm/Kidding Year Interaction	432	0	0
Farm/Kidding Year Interaction	433	0	0
Farm/Kidding Year Interaction	434	0	0
Farm/Kidding Year Interaction	435	0	0
Farm/Kidding Year Interaction	436	0	0
Farm/Kidding Year Interaction	437	0	0
Farm/Kidding Year Interaction	438	0	0
Farm/Kidding Year Interaction	439	0	0
Farm/Kidding Year Interaction	440	0	0
Farm/Kidding Year Interaction	441	0	0
Farm/Kidding Year Interaction	442	0	0
Farm/Kidding Year Interaction	443	0	0
Farm/Kidding Year Interaction	444	0	0
Farm/Kidding Year Interaction	445	0	0
Farm/Kidding Year Interaction	446	0	0
Farm/Kidding Year Interaction	447	0	0
Farm/Kidding Year Interaction	448	0	0
Farm/Kidding Year Interaction	449	0	0
Farm/Kidding Year Interaction	450	0	0
Farm/Kidding Year Interaction	451	0	0
Farm/Kidding Year Interaction	452	0	0
Farm/Kidding Year Interaction	453	0	0
Farm/Kidding Year Interaction	454	0	0
Farm/Kidding Year Interaction	455	0	0
Farm/Kidding Year Interaction	456	0	0
Farm/Kidding Year Interaction	457	0	0
Farm/Kidding Year Interaction	458	0	0
Farm/Kidding Year Interaction	459	0	0
Farm/Kidding Year Interaction	460	0	0
Farm/Kidding Year Interaction	461	0	0
Farm/Kidding Year Interaction	462	0	0
Farm/Kidding Year Interaction	463	0	0
Farm/Kidding Year Interaction	464	0	0
Farm/Kidding Year Interaction	465	0	0
Farm/Kidding Year Interaction	466	0	0
Farm/Kidding Year Interaction	467	0	0
Farm/Kidding Year Interaction	468	0	0
Farm/Kidding Year Interaction	469	0	0
Farm/Kidding Year Interaction	470	0	0
Farm/Kidding Year Interaction	471	0	0
Farm/Kidding Year Interaction	472	0	0
Farm/Kidding Year Interaction	473	0	0
Farm/Kidding Year Interaction	474	0	0
Farm/Kidding Year Interaction	475	0	0
Farm/Kidding Year Interaction	476	0	0

## Sheet: Body Depth
Parameter/Fixed Effect/Covariate	Level	Value	Standard error	t	Pr > |t|	Lower bound (95%)	Upper bound (95%)
Intercept	Intercept	6.2184	0.399	15.5845	< 0,0001	5.4363	7.0004
Age (in years)	Age (in years)	0.046	0.0041	11.3123	< 0,0001	0.0381	0.054
Days in Milk	Days in Milk	0.001	0.0001	13.722	< 0,0001	0.0009	0.0012
Farm	1	-0.8407	0.385	-2.1838	0.029	-1.5953	-0.0862
Farm	2	-1.8454	0.4177	-4.4183	< 0,0001	-2.6641	-1.0268
Farm	3	-1.5056	0.4318	-3.4872	0.0005	-2.3519	-0.6594
Farm	4	-0.2949	0.3856	-0.7649	0.4444	-1.0506	0.4608
Farm	5	-0.6975	0.4018	-1.7362	0.0825	-1.485	0.0899
Farm	6	-2.6789	0.9261	-2.8926	0.0038	-4.4941	-0.8637
Farm	7	-0.5372	0.4401	-1.2207	0.2222	-1.3997	0.3254
Farm	8	-0.5404	0.3846	-1.405	0.16	-1.2943	0.2135
Farm	9	-0.8072	0.3882	-2.0794	0.0376	-1.5681	-0.0463
Farm	10	0.0289	0.4106	0.0704	0.9439	-0.7759	0.8337
Farm	11	-1.4948	0.6994	-2.1371	0.0326	-2.8657	-0.1239
Farm	12	-0.0721	0.9154	-0.0788	0.9372	-1.8664	1.7221
Farm	13	0.0894	0.3925	0.2278	0.8198	-0.6799	0.8587
Farm	14	1.2232	0.6997	1.7481	0.0804	-0.1483	2.5947
Farm	15	-0.4783	0.4659	-1.0266	0.3046	-1.3916	0.4349
Farm	16	-1.1182	0.4106	-2.7233	0.0065	-1.923	-0.3134
Farm	17	-2.2808	0.7132	-3.1981	0.0014	-3.6786	-0.8829
Farm	18	-0.4061	0.4122	-0.9851	0.3246	-1.214	0.4018
Farm	19	0.0459	0.4665	0.0985	0.9215	-0.8684	0.9603
Farm	20	-1.9343	0.4656	-4.1544	< 0,0001	-2.8469	-1.0217
Farm	21	-0.7985	0.4157	-1.9209	0.0547	-1.6133	0.0162
Farm	22	0.9107	0.9154	0.9948	0.3198	-0.8835	2.705
Farm	23	-2.1047	0.4152	-5.0696	< 0,0001	-2.9184	-1.2909
Farm	24	-1.8803	0.4137	-4.5453	< 0,0001	-2.6911	-1.0695
Farm	25	-0.448	0.4456	-1.0055	0.3147	-1.3213	0.4253
Farm	26	0.3016	0.5066	0.5953	0.5516	-0.6914	1.2946
Farm	27	-1.6846	0.6988	-2.4107	0.0159	-3.0543	-0.3149
Farm	28	-0.9853	0.5058	-1.9481	0.0514	-1.9767	0.006
Farm	29	-0.7154	0.4123	-1.735	0.0827	-1.5236	0.0928
Farm	30	-1.6584	0.4118	-4.0271	< 0,0001	-2.4656	-0.8512
Farm	31	0.9417	0.4456	2.1135	0.0346	0.0684	1.815
Farm	32	-0.7666	0.4318	-1.7755	0.0758	-1.6128	0.0797
Farm	33	0.4873	0.5611	0.8685	0.3851	-0.6124	1.587
Farm	34	-0.7242	0.4895	-1.4796	0.139	-1.6835	0.2352
Farm	35	-1.0042	0.6994	-1.4358	0.1511	-2.3751	0.3667
Farm	36	-3.4545	0.4101	-8.4233	< 0,0001	-4.2584	-2.6507
Farm	37	-0.1343	0.9155	-0.1467	0.8834	-1.9286	1.66
Farm	38	-1.1584	0.4352	-2.662	0.0078	-2.0114	-0.3055
Farm	39	-0.0725	0.9154	-0.0792	0.9369	-1.8668	1.7217
Farm	40	-0.9579	0.4026	-2.3794	0.0173	-1.7469	-0.1688
Farm	41	-0.6884	0.3856	-1.7851	0.0742	-1.4443	0.0674
Farm	42	-0.9548	0.5771	-1.6544	0.0981	-2.086	0.1764
Farm	43	-0.355	0.5286	-0.6715	0.5019	-1.3911	0.6811
Farm	44	-0.2234	0.4106	-0.544	0.5864	-1.0282	0.5814
Farm	45	-0.5165	0.3877	-1.3321	0.1828	-1.2764	0.2434
Farm	46	-0.5478	0.6994	-0.7832	0.4335	-1.9187	0.8231
Farm	47	0.4217	0.4771	0.8839	0.3768	-0.5134	1.3568
Farm	48	-2.1255	0.4577	-4.6438	< 0,0001	-3.0226	-1.2284
Farm	49	-2.0381	0.4092	-4.9807	< 0,0001	-2.8401	-1.2361
Farm	50	1.0374	0.4315	2.4042	0.0162	0.1917	1.8832
Farm	51	-0.8299	0.3798	-2.1851	0.0289	-1.5743	-0.0855
Farm	52	-1.1614	0.49	-2.3705	0.0178	-2.1217	-0.2011
Farm	53	-0.6682	0.4584	-1.4576	0.145	-1.5667	0.2303
Farm	54	-0.2322	0.5282	-0.4395	0.6603	-1.2675	0.8032
Farm	55	-0.3548	0.4714	-0.7528	0.4516	-1.2787	0.569
Farm	56	-1.2005	0.4141	-2.899	0.0037	-2.0122	-0.3889
Farm	57	-0.2924	0.4025	-0.7263	0.4677	-1.0813	0.4966
Farm	58	-0.0221	0.9154	-0.0241	0.9808	-1.8163	1.7722
Farm	59	-0.5664	0.4079	-1.3884	0.165	-1.3659	0.2332
Farm	60	0.2568	0.6107	0.4205	0.6741	-0.9401	1.4538
Farm	61	-0.3136	0.4025	-0.7791	0.4359	-1.1026	0.4754
Farm	62	-0.327	0.4139	-0.79	0.4295	-1.1383	0.4843
Farm	63	-1.6283	0.6103	-2.6682	0.0076	-2.8245	-0.4322
Farm	64	-1.1918	0.4766	-2.5009	0.0124	-2.1259	-0.2577
Farm	65	-0.2995	0.4579	-0.6541	0.513	-1.197	0.598
Farm	66	-1.9376	0.4196	-4.6179	< 0,0001	-2.76	-1.1152
Farm	67	0.8141	0.6995	1.1638	0.2445	-0.557	2.1852
Farm	68	-0.619	0.4096	-1.5111	0.1308	-1.4219	0.1839
Farm	69	0.8386	0.9155	0.916	0.3597	-0.9558	2.6329
Farm	70	0.0144	0.6256	0.023	0.9816	-1.2118	1.2406
Farm	71	0.2283	0.4891	0.4668	0.6407	-0.7304	1.1871
Farm	72	-0.3651	0.5292	-0.69	0.4902	-1.4023	0.6721
Farm	73	-1.0774	0.44	-2.449	0.0143	-1.9398	-0.2151
Farm	74	0.8868	0.5611	1.5805	0.114	-0.2129	1.9866
Farm	75	-1.1342	0.9155	-1.2389	0.2154	-2.9285	0.6601
Farm	76	-1.9018	0.3957	-4.8055	< 0,0001	-2.6774	-1.1261
Farm	77	-4.0687	0.9154	-4.4447	< 0,0001	-5.863	-2.2745
Farm	78	-0.5197	0.7126	-0.7292	0.4659	-1.9165	0.8771
Farm	79	-1.6072	0.4081	-3.9382	< 0,0001	-2.4072	-0.8073
Farm	80	-0.6666	0.5085	-1.311	0.1898	-1.6632	0.33
Farm	81	-0.1111	0.5611	-0.198	0.8431	-1.2108	0.9887
Farm	82	-0.5992	0.9259	-0.6472	0.5175	-2.4141	1.2156
Farm	83	-0.2982	0.4035	-0.739	0.4599	-1.0891	0.4927
Farm	84	-0.0185	0.3905	-0.0474	0.9622	-0.7838	0.7468
Farm	85	-0.6161	0.4009	-1.537	0.1243	-1.4019	0.1696
Farm	86	0	0
Sex	Buck	-1.2053	0.1356	-8.8873	< 0,0001	-1.4711	-0.9395
Sex	Doe	0	0
Lactation Stage/Maturity	Primiparous	-0.2382	0.0135	-17.6299	< 0,0001	-0.2646	-0.2117
Lactation Stage/Maturity	Multiparous	0	0
Lactation Stage/Maturity	Buckling	-0.6695	0.0497	-13.4831	< 0,0001	-0.7668	-0.5721
Lactation Stage/Maturity	Buck	0	0
Kidding Month	January	-0.1108	0.027	-4.1042	< 0,0001	-0.1637	-0.0579
Kidding Month	February	-0.2051	0.0273	-7.5051	< 0,0001	-0.2587	-0.1516
Kidding Month	March	-0.3297	0.0284	-11.6226	< 0,0001	-0.3853	-0.2741
Kidding Month	April	-0.308	0.0276	-11.1405	< 0,0001	-0.3622	-0.2538
Kidding Month	May	-0.3165	0.0294	-10.7674	< 0,0001	-0.3742	-0.2589
Kidding Month	June	-0.4513	0.0306	-14.7377	< 0,0001	-0.5113	-0.3913
Kidding Month	July	-0.3257	0.036	-9.0444	< 0,0001	-0.3962	-0.2551
Kidding Month	August	-0.2689	0.0289	-9.3022	< 0,0001	-0.3256	-0.2122
Kidding Month	September	-0.4874	0.0296	-16.4723	< 0,0001	-0.5454	-0.4294
Kidding Month	October	-0.123	0.0282	-4.3658	< 0,0001	-0.1783	-0.0678
Kidding Month	November	-0.0964	0.0264	-3.6521	0.0003	-0.1482	-0.0447
Kidding Month	December	0	0
Kidding Season	Winter	0	0
Kidding Season	Spring	0	0
Kidding Season	Summer	0	0
Kidding Season	Autumn	0	0
Farm/Kidding Year Interaction	1	-1.6838	0.4086	-4.1207	< 0,0001	-2.4848	-0.8829
Farm/Kidding Year Interaction	2	-1.584	0.347	-4.5648	< 0,0001	-2.2641	-0.9039
Farm/Kidding Year Interaction	3	-1.2322	0.3258	-3.7819	0.0002	-1.8709	-0.5936
Farm/Kidding Year Interaction	4	-0.4746	0.1924	-2.4665	0.0136	-0.8518	-0.0975
Farm/Kidding Year Interaction	5	-0.6467	0.3127	-2.0679	0.0387	-1.2596	-0.0338
Farm/Kidding Year Interaction	6	-0.6357	0.7124	-0.8924	0.3722	-2.032	0.7605
Farm/Kidding Year Interaction	7	-1.5773	0.7743	-2.037	0.0417	-3.095	-0.0596
Farm/Kidding Year Interaction	8	-1.0641	0.8572	-1.2413	0.2145	-2.7443	0.6161
Farm/Kidding Year Interaction	9	-3.505	1.0413	-3.3659	0.0008	-5.546	-1.464
Farm/Kidding Year Interaction	10	-0.1964	0.1839	-1.068	0.2855	-0.5569	0.1641
Farm/Kidding Year Interaction	11	0	0
Farm/Kidding Year Interaction	12	0.1221	0.2761	0.4421	0.6584	-0.4191	0.6632
Farm/Kidding Year Interaction	13	-0.5245	0.8539	-0.6142	0.5391	-2.1982	1.1493
Farm/Kidding Year Interaction	14	0.2632	0.4085	0.6443	0.5194	-0.5375	1.064
Farm/Kidding Year Interaction	15	-1.0276	0.925	-1.1109	0.2666	-2.8406	0.7854
Farm/Kidding Year Interaction	16	0	0
Farm/Kidding Year Interaction	17	0.2414	0.852	0.2833	0.777	-1.4287	1.9114
Farm/Kidding Year Interaction	18	-1.817	0.8715	-2.0848	0.0371	-3.5253	-0.1088
Farm/Kidding Year Interaction	19	-0.9726	0.9122	-1.0662	0.2863	-2.7606	0.8153
Farm/Kidding Year Interaction	20	0.0893	0.1692	0.5279	0.5976	-0.2423	0.4209
Farm/Kidding Year Interaction	21	-0.7806	0.2929	-2.665	0.0077	-1.3546	-0.2065
Farm/Kidding Year Interaction	22	-0.7128	0.1737	-4.1035	< 0,0001	-1.0532	-0.3723
Farm/Kidding Year Interaction	23	0.0653	0.8538	0.0765	0.939	-1.6082	1.7388
Farm/Kidding Year Interaction	24	-1.2414	0.2526	-4.9139	< 0,0001	-1.7365	-0.7462
Farm/Kidding Year Interaction	25	-0.1507	0.232	-0.6496	0.5159	-0.6056	0.3041
Farm/Kidding Year Interaction	26	-1.2685	0.2653	-4.7812	< 0,0001	-1.7885	-0.7485
Farm/Kidding Year Interaction	27	-0.8303	0.5766	-1.4398	0.1499	-1.9605	0.2999
Farm/Kidding Year Interaction	28	0.2029	0.6351	0.3194	0.7494	-1.042	1.4477
Farm/Kidding Year Interaction	29	-1.1938	0.194	-6.1526	< 0,0001	-1.5741	-0.8135
Farm/Kidding Year Interaction	30	-1.8726	0.249	-7.52	< 0,0001	-2.3607	-1.3845
Farm/Kidding Year Interaction	31	-1.5144	0.1704	-8.8888	< 0,0001	-1.8484	-1.1805
Farm/Kidding Year Interaction	32	0	0
Farm/Kidding Year Interaction	33	-3.0103	0.2285	-13.1751	< 0,0001	-3.4581	-2.5624
Farm/Kidding Year Interaction	34	-3.7008	0.6157	-6.0109	< 0,0001	-4.9076	-2.4941
Farm/Kidding Year Interaction	35	-2.114	0.2206	-9.5841	< 0,0001	-2.5464	-1.6817
Farm/Kidding Year Interaction	36	-1.9397	0.2273	-8.5337	< 0,0001	-2.3853	-1.4942
Farm/Kidding Year Interaction	37	-2.9259	0.6275	-4.6625	< 0,0001	-4.1559	-1.6959
Farm/Kidding Year Interaction	38	-2.1918	0.183	-11.9786	< 0,0001	-2.5505	-1.8332
Farm/Kidding Year Interaction	39	-4.179	0.6156	-6.7882	< 0,0001	-5.3856	-2.9724
Farm/Kidding Year Interaction	40	-1.5071	0.2103	-7.1681	< 0,0001	-1.9192	-1.095
Farm/Kidding Year Interaction	41	-2.0831	0.2603	-8.0013	< 0,0001	-2.5934	-1.5728
Farm/Kidding Year Interaction	42	-1.3732	0.3161	-4.3447	< 0,0001	-1.9927	-0.7537
Farm/Kidding Year Interaction	43	-3.4182	0.6673	-5.1225	< 0,0001	-4.726	-2.1103
Farm/Kidding Year Interaction	44	1.5122	1.1818	1.2796	0.2007	-0.8042	3.8285
Farm/Kidding Year Interaction	45	0.0588	0.2334	0.252	0.801	-0.3987	0.5164
Farm/Kidding Year Interaction	46	-0.1315	0.631	-0.2084	0.8349	-1.3684	1.1053
Farm/Kidding Year Interaction	47	1.4932	1.0232	1.4593	0.1445	-0.5123	3.4987
Farm/Kidding Year Interaction	48	0.3021	0.2048	1.4751	0.1402	-0.0993	0.7034
Farm/Kidding Year Interaction	49	-0.266	0.3147	-0.8451	0.3981	-0.8829	0.3509
Farm/Kidding Year Interaction	50	0.9032	0.2407	3.7525	0.0002	0.4314	1.3749
Farm/Kidding Year Interaction	51	0.9646	0.2432	3.9657	< 0,0001	0.4879	1.4414
Farm/Kidding Year Interaction	52	0.6506	0.1797	3.6204	0.0003	0.2984	1.0029
Farm/Kidding Year Interaction	53	0.9657	0.4645	2.0788	0.0376	0.0552	1.8762
Farm/Kidding Year Interaction	54	-0.3524	0.2408	-1.4634	0.1434	-0.8243	0.1196
Farm/Kidding Year Interaction	55	-0.1235	0.258	-0.4786	0.6322	-0.6291	0.3822
Farm/Kidding Year Interaction	56	0	0
Farm/Kidding Year Interaction	57	0.2858	0.1951	1.4648	0.143	-0.0966	0.6682
Farm/Kidding Year Interaction	58	0.7175	0.2177	3.2953	0.001	0.2907	1.1442
Farm/Kidding Year Interaction	59	0.3939	0.3343	1.1784	0.2386	-0.2613	1.0492
Farm/Kidding Year Interaction	60	0.6334	0.2746	2.3065	0.0211	0.0952	1.1716
Farm/Kidding Year Interaction	61	0.5051	0.2663	1.8967	0.0579	-0.0169	1.027
Farm/Kidding Year Interaction	62	0.3872	0.4558	0.8495	0.3956	-0.5062	1.2806
Farm/Kidding Year Interaction	63	0.5068	0.1779	2.849	0.0044	0.1581	0.8554
Farm/Kidding Year Interaction	64	1.5025	0.3838	3.915	< 0,0001	0.7503	2.2547
Farm/Kidding Year Interaction	65	1.5445	0.3873	3.9882	< 0,0001	0.7855	2.3036
Farm/Kidding Year Interaction	66	0.3596	0.2366	1.5198	0.1286	-0.1042	0.8233
Farm/Kidding Year Interaction	67	0	0
Farm/Kidding Year Interaction	68	-0.1339	0.1947	-0.6879	0.4915	-0.5154	0.2476
Farm/Kidding Year Interaction	69	0.1741	0.1848	0.9419	0.3463	-0.1882	0.5364
Farm/Kidding Year Interaction	70	-0.2909	0.6178	-0.4708	0.6378	-1.5019	0.9201
Farm/Kidding Year Interaction	71	-0.4843	0.4453	-1.0876	0.2768	-1.3572	0.3885
Farm/Kidding Year Interaction	72	-0.5931	0.4495	-1.3196	0.187	-1.4741	0.2879
Farm/Kidding Year Interaction	73	-1.0585	0.7367	-1.4368	0.1508	-2.5024	0.3854
Farm/Kidding Year Interaction	74	-1.7075	0.2967	-5.7555	< 0,0001	-2.289	-1.126
Farm/Kidding Year Interaction	75	-1.7468	0.2838	-6.1554	< 0,0001	-2.303	-1.1905
Farm/Kidding Year Interaction	76	-2.0951	0.4661	-4.4945	< 0,0001	-3.0087	-1.1814
Farm/Kidding Year Interaction	77	0	0
Farm/Kidding Year Interaction	78	0.3325	0.2082	1.5971	0.1103	-0.0756	0.7407
Farm/Kidding Year Interaction	79	0.6619	0.1793	3.6911	0.0002	0.3104	1.0134
Farm/Kidding Year Interaction	80	-1.2804	0.5079	-2.5207	0.0117	-2.276	-0.2848
Farm/Kidding Year Interaction	81	-0.8277	0.5051	-1.6387	0.1013	-1.8176	0.1623
Farm/Kidding Year Interaction	82	-2.4624	0.9754	-2.5245	0.0116	-4.3742	-0.5506
Farm/Kidding Year Interaction	83	-1.6363	0.7778	-2.1036	0.0354	-3.1608	-0.1117
Farm/Kidding Year Interaction	84	0.5297	0.2412	2.1961	0.0281	0.0569	1.0025
Farm/Kidding Year Interaction	85	-0.6967	0.2345	-2.9707	0.003	-1.1564	-0.237
Farm/Kidding Year Interaction	86	0	0
Farm/Kidding Year Interaction	87	-0.2433	0.8558	-0.2843	0.7762	-1.9207	1.4341
Farm/Kidding Year Interaction	88	-0.8327	0.8774	-0.949	0.3426	-2.5524	0.8871
Farm/Kidding Year Interaction	89	-0.1244	0.3146	-0.3954	0.6926	-0.7411	0.4923
Farm/Kidding Year Interaction	90	-0.1716	0.2376	-0.7223	0.4701	-0.6372	0.294
Farm/Kidding Year Interaction	91	-0.1754	0.2384	-0.7357	0.4619	-0.6426	0.2918
Farm/Kidding Year Interaction	92	0.7676	0.1631	4.7067	< 0,0001	0.448	1.0873
Farm/Kidding Year Interaction	93	0.8187	0.1557	5.2585	< 0,0001	0.5135	1.1238
Farm/Kidding Year Interaction	94	0.703	0.852	0.8251	0.4093	-0.967	2.373
Farm/Kidding Year Interaction	95	1.3397	0.6116	2.1906	0.0285	0.141	2.5384
Farm/Kidding Year Interaction	96	-0.7417	0.9255	-0.8015	0.4229	-2.5557	1.0722
Farm/Kidding Year Interaction	97	0.7563	0.5562	1.3598	0.1739	-0.3339	1.8465
Farm/Kidding Year Interaction	98	0.4324	0.2973	1.4546	0.1458	-0.1502	1.015
Farm/Kidding Year Interaction	99	-0.3652	0.3293	-1.1091	0.2674	-1.0107	0.2802
Farm/Kidding Year Interaction	100	-0.3461	0.3289	-1.0524	0.2926	-0.9908	0.2985
Farm/Kidding Year Interaction	101	0.379	0.2351	1.6124	0.1069	-0.0817	0.8397
Farm/Kidding Year Interaction	102	-1.4209	0.4437	-3.2023	0.0014	-2.2905	-0.5512
Farm/Kidding Year Interaction	103	-1.5391	0.4544	-3.3867	0.0007	-2.4298	-0.6484
Farm/Kidding Year Interaction	104	-0.8245	0.9445	-0.873	0.3827	-2.6757	1.0267
Farm/Kidding Year Interaction	105	0.4549	0.1818	2.5027	0.0123	0.0986	0.8112
Farm/Kidding Year Interaction	106	0.3441	0.1787	1.9255	0.0542	-0.0062	0.6943
Farm/Kidding Year Interaction	107	-0.6099	0.8565	-0.7121	0.4764	-2.2887	1.0689
Farm/Kidding Year Interaction	108	-0.097	0.5136	-0.189	0.8501	-1.1036	0.9095
Farm/Kidding Year Interaction	109	0.4829	0.194	2.4892	0.0128	0.1027	0.8632
Farm/Kidding Year Interaction	110	0.6388	0.1692	3.7756	0.0002	0.3072	0.9704
Farm/Kidding Year Interaction	111	0.4442	0.512	0.8675	0.3857	-0.5594	1.4477
Farm/Kidding Year Interaction	112	0.9042	0.2347	3.8535	0.0001	0.4443	1.3642
Farm/Kidding Year Interaction	113	1.0133	0.4319	2.3461	0.019	0.1668	1.8599
Farm/Kidding Year Interaction	114	1.2059	0.2089	5.7736	< 0,0001	0.7965	1.6152
Farm/Kidding Year Interaction	115	1.4388	0.358	4.0191	< 0,0001	0.7372	2.1405
Farm/Kidding Year Interaction	116	0.3563	0.8485	0.42	0.6745	-1.3068	2.0194
Farm/Kidding Year Interaction	117	-0.3168	1.1891	-0.2664	0.7899	-2.6474	2.0138
Farm/Kidding Year Interaction	118	-0.8875	0.2617	-3.391	0.0007	-1.4005	-0.3745
Farm/Kidding Year Interaction	119	-1.175	0.2992	-3.9269	< 0,0001	-1.7614	-0.5885
Farm/Kidding Year Interaction	120	-0.3156	0.3807	-0.8291	0.407	-1.0618	0.4305
Farm/Kidding Year Interaction	121	-1.581	0.4432	-3.5675	0.0004	-2.4497	-0.7124
Farm/Kidding Year Interaction	122	-0.2768	0.3745	-0.7392	0.4598	-1.0109	0.4572
Farm/Kidding Year Interaction	123	-0.6228	0.4015	-1.5512	0.1209	-1.4097	0.1641
Farm/Kidding Year Interaction	124	-0.9167	0.4285	-2.1391	0.0324	-1.7566	-0.0767
Farm/Kidding Year Interaction	125	-0.3267	0.7085	-0.4611	0.6447	-1.7155	1.062
Farm/Kidding Year Interaction	126	-0.1103	0.3753	-0.294	0.7688	-0.8459	0.6252
Farm/Kidding Year Interaction	127	0.1866	0.344	0.5425	0.5875	-0.4877	0.861
Farm/Kidding Year Interaction	128	-0.3903	0.8496	-0.4593	0.646	-2.0556	1.275
Farm/Kidding Year Interaction	129	0.1573	0.3082	0.5103	0.6099	-0.4468	0.7613
Farm/Kidding Year Interaction	130	0.12	0.4564	0.263	0.7926	-0.7745	1.0145
Farm/Kidding Year Interaction	131	0.2312	0.3037	0.7614	0.4464	-0.364	0.8264
Farm/Kidding Year Interaction	132	0.1407	0.2376	0.5923	0.5537	-0.3249	0.6063
Farm/Kidding Year Interaction	133	0.1931	0.187	1.0323	0.3019	-0.1735	0.5597
Farm/Kidding Year Interaction	134	0.8667	0.974	0.8898	0.3736	-1.0423	2.7758
Farm/Kidding Year Interaction	135	0.281	0.2359	1.1914	0.2335	-0.1813	0.7433
Farm/Kidding Year Interaction	136	-1.0158	0.4625	-2.1963	0.0281	-1.9223	-0.1093
Farm/Kidding Year Interaction	137	0.4922	0.2783	1.7689	0.0769	-0.0532	1.0376
Farm/Kidding Year Interaction	138	1.2164	0.2062	5.8988	< 0,0001	0.8122	1.6206
Farm/Kidding Year Interaction	139	-0.0739	0.3158	-0.2339	0.815	-0.6929	0.5451
Farm/Kidding Year Interaction	140	1.4824	0.2507	5.912	< 0,0001	0.9909	1.9739
Farm/Kidding Year Interaction	141	-0.0094	0.8593	-0.0109	0.9913	-1.6936	1.6748
Farm/Kidding Year Interaction	142	-0.5603	0.2838	-1.9743	0.0483	-1.1166	-0.0041
Farm/Kidding Year Interaction	143	-0.6145	0.2543	-2.4162	0.0157	-1.113	-0.116
Farm/Kidding Year Interaction	144	-0.4141	0.3803	-1.0889	0.2762	-1.1594	0.3313
Farm/Kidding Year Interaction	145	-0.9197	0.529	-1.7385	0.0821	-1.9566	0.1172
Farm/Kidding Year Interaction	146	0.0998	0.4076	0.2449	0.8065	-0.6991	0.8987
Farm/Kidding Year Interaction	147	0.1861	0.2587	0.7194	0.4719	-0.3209	0.6932
Farm/Kidding Year Interaction	148	0.1164	0.2294	0.5073	0.6119	-0.3332	0.566
Farm/Kidding Year Interaction	149	0.2743	0.2426	1.1305	0.2583	-0.2013	0.7498
Farm/Kidding Year Interaction	150	-1.4144	0.3364	-4.2043	< 0,0001	-2.0737	-0.755
Farm/Kidding Year Interaction	151	0.8011	0.2258	3.5477	0.0004	0.3585	1.2437
Farm/Kidding Year Interaction	152	0.5948	0.2552	2.3309	0.0198	0.0946	1.0949
Farm/Kidding Year Interaction	153	-0.1077	0.1832	-0.5877	0.5568	-0.4667	0.2514
Farm/Kidding Year Interaction	154	-0.6427	0.6155	-1.0442	0.2964	-1.8491	0.5637
Farm/Kidding Year Interaction	155	0.7054	0.3565	1.9786	0.0479	0.0066	1.4041
Farm/Kidding Year Interaction	156	1.2316	0.1322	9.3179	< 0,0001	0.9725	1.4906
Farm/Kidding Year Interaction	157	-0.6452	0.4087	-1.5788	0.1144	-1.4462	0.1558
Farm/Kidding Year Interaction	158	0.8666	0.3363	2.5767	0.01	0.2074	1.5259
Farm/Kidding Year Interaction	159	-0.5003	0.4859	-1.0295	0.3032	-1.4527	0.4522
Farm/Kidding Year Interaction	160	-0.4484	0.4029	-1.113	0.2657	-1.2381	0.3413
Farm/Kidding Year Interaction	161	-0.6053	0.6263	-0.9665	0.3338	-1.8328	0.6222
Farm/Kidding Year Interaction	162	0.0831	0.223	0.3728	0.7093	-0.354	0.5203
Farm/Kidding Year Interaction	163	0.2889	0.3696	0.7817	0.4344	-0.4355	1.0134
Farm/Kidding Year Interaction	164	-0.5725	0.8655	-0.6615	0.5083	-2.269	1.1239
Farm/Kidding Year Interaction	165	-0.0942	0.2371	-0.3974	0.6911	-0.559	0.3705
Farm/Kidding Year Interaction	166	-0.1383	0.2365	-0.5847	0.5588	-0.6019	0.3253
Farm/Kidding Year Interaction	167	-0.4076	0.2411	-1.6909	0.0909	-0.8801	0.0649
Farm/Kidding Year Interaction	168	-0.023	0.3532	-0.065	0.9481	-0.7153	0.6693
Farm/Kidding Year Interaction	169	0.2477	0.3541	0.6995	0.4843	-0.4463	0.9416
Farm/Kidding Year Interaction	170	-0.7795	0.3538	-2.2033	0.0276	-1.473	-0.0861
Farm/Kidding Year Interaction	171	-0.9395	0.3705	-2.536	0.0112	-1.6656	-0.2134
Farm/Kidding Year Interaction	172	-0.044	0.2257	-0.1951	0.8453	-0.4865	0.3984
Farm/Kidding Year Interaction	173	-0.8992	0.2442	-3.6824	0.0002	-1.3779	-0.4206
Farm/Kidding Year Interaction	174	0.6709	0.3505	1.914	0.0556	-0.0161	1.358
Farm/Kidding Year Interaction	175	0.3886	0.2275	1.7078	0.0877	-0.0574	0.8345
Farm/Kidding Year Interaction	176	-0.3477	0.2457	-1.415	0.1571	-0.8294	0.1339
Farm/Kidding Year Interaction	177	-0.4115	0.2729	-1.5078	0.1316	-0.9464	0.1234
Farm/Kidding Year Interaction	178	-0.1297	0.2278	-0.5693	0.5692	-0.5763	0.3169
Farm/Kidding Year Interaction	179	-0.0177	0.175	-0.1012	0.9194	-0.3607	0.3253
Farm/Kidding Year Interaction	180	-1.7017	0.4647	-3.6618	0.0003	-2.6126	-0.7908
Farm/Kidding Year Interaction	181	-0.4689	0.8538	-0.5492	0.5829	-2.1424	1.2046
Farm/Kidding Year Interaction	182	0.644	0.9254	0.6959	0.4865	-1.1698	2.4578
Farm/Kidding Year Interaction	183	0.6467	0.3945	1.6393	0.1012	-0.1265	1.4199
Farm/Kidding Year Interaction	184	0.1424	0.5566	0.2559	0.798	-0.9485	1.2333
Farm/Kidding Year Interaction	185	0.8582	0.2423	3.5421	0.0004	0.3833	1.3331
Farm/Kidding Year Interaction	186	-0.1897	0.3371	-0.5627	0.5736	-0.8505	0.4711
Farm/Kidding Year Interaction	187	3.0494	0.1207	25.2648	< 0,0001	2.8128	3.286
Farm/Kidding Year Interaction	188	2.9074	0.1433	20.2914	< 0,0001	2.6265	3.1882
Farm/Kidding Year Interaction	189	-0.1827	0.262	-0.6975	0.4855	-0.6962	0.3307
Farm/Kidding Year Interaction	190	-0.7685	0.1843	-4.1691	< 0,0001	-1.1298	-0.4072
Farm/Kidding Year Interaction	191	-0.2352	0.4126	-0.5701	0.5686	-1.0439	0.5734
Farm/Kidding Year Interaction	192	0.1741	0.2467	0.7056	0.4804	-0.3095	0.6577
Farm/Kidding Year Interaction	193	0.0539	0.2326	0.2318	0.8167	-0.402	0.5098
Farm/Kidding Year Interaction	194	-0.7142	0.5336	-1.3385	0.1807	-1.7602	0.3317
Farm/Kidding Year Interaction	195	1.536	0.3041	5.0508	< 0,0001	0.94	2.1321
Farm/Kidding Year Interaction	196	1.4398	0.3412	4.2203	< 0,0001	0.7711	2.1085
Farm/Kidding Year Interaction	197	-0.4603	0.1764	-2.6088	0.0091	-0.8061	-0.1145
Farm/Kidding Year Interaction	198	-0.2058	0.3576	-0.5756	0.5649	-0.9067	0.4951
Farm/Kidding Year Interaction	199	0.7158	0.515	1.3898	0.1646	-0.2937	1.7253
Farm/Kidding Year Interaction	200	0.0882	0.2049	0.4303	0.667	-0.3134	0.4897
Farm/Kidding Year Interaction	201	0.1567	0.2438	0.6425	0.5206	-0.3213	0.6346
Farm/Kidding Year Interaction	202	-0.7612	0.3926	-1.9391	0.0525	-1.5307	0.0082
Farm/Kidding Year Interaction	203	1.3779	0.1732	7.9537	< 0,0001	1.0383	1.7174
Farm/Kidding Year Interaction	204	0.5596	0.1724	3.2454	0.0012	0.2216	0.8976
Farm/Kidding Year Interaction	205	-0.3272	1.189	-0.2752	0.7832	-2.6578	2.0034
Farm/Kidding Year Interaction	206	-0.3045	0.1806	-1.6864	0.0917	-0.6584	0.0494
Farm/Kidding Year Interaction	207	-1.4407	0.3057	-4.7127	< 0,0001	-2.0399	-0.8415
Farm/Kidding Year Interaction	208	0	0
Farm/Kidding Year Interaction	209	-0.3844	0.2097	-1.8334	0.0668	-0.7954	0.0266
Farm/Kidding Year Interaction	210	-0.048	0.2175	-0.2206	0.8254	-0.4743	0.3783
Farm/Kidding Year Interaction	211	-0.069	0.4272	-0.1615	0.8717	-0.9062	0.7682
Farm/Kidding Year Interaction	212	-0.0559	0.1804	-0.31	0.7566	-0.4095	0.2976
Farm/Kidding Year Interaction	213	0.3384	0.5108	0.6625	0.5077	-0.6628	1.3395
Farm/Kidding Year Interaction	214	0.0591	0.2367	0.2497	0.8028	-0.4047	0.523
Farm/Kidding Year Interaction	215	0.4533	0.5351	0.847	0.397	-0.5956	1.5021
Farm/Kidding Year Interaction	216	0.4513	0.8712	0.5181	0.6044	-1.2562	2.1589
Farm/Kidding Year Interaction	217	-0.2551	0.2414	-1.0565	0.2908	-0.7283	0.2182
Farm/Kidding Year Interaction	218	-0.3637	0.8684	-0.4188	0.6754	-2.0657	1.3384
Farm/Kidding Year Interaction	219	-0.5111	0.2135	-2.3933	0.0167	-0.9296	-0.0925
Farm/Kidding Year Interaction	220	-0.0645	0.4252	-0.1517	0.8794	-0.8979	0.7688
Farm/Kidding Year Interaction	221	-0.1356	0.2129	-0.6372	0.524	-0.5528	0.2816
Farm/Kidding Year Interaction	222	-0.9366	0.2267	-4.132	< 0,0001	-1.3809	-0.4923
Farm/Kidding Year Interaction	223	0.334	0.2351	1.421	0.1553	-0.1267	0.7948
Farm/Kidding Year Interaction	224	-0.5171	0.1889	-2.7382	0.0062	-0.8873	-0.147
Farm/Kidding Year Interaction	225	-1.1753	0.1759	-6.68	< 0,0001	-1.5202	-0.8305
Farm/Kidding Year Interaction	226	-0.9511	0.4021	-2.3656	0.018	-1.7392	-0.1631
Farm/Kidding Year Interaction	227	-0.4844	0.408	-1.1871	0.2352	-1.2841	0.3154
Farm/Kidding Year Interaction	228	-2.7195	0.3583	-7.5895	< 0,0001	-3.4218	-2.0172
Farm/Kidding Year Interaction	229	-0.3409	0.2231	-1.5279	0.1265	-0.7783	0.0964
Farm/Kidding Year Interaction	230	-0.8544	0.3115	-2.7425	0.0061	-1.465	-0.2438
Farm/Kidding Year Interaction	231	-1.108	0.2132	-5.196	< 0,0001	-1.5259	-0.69
Farm/Kidding Year Interaction	232	-0.3256	0.2321	-1.4025	0.1608	-0.7806	0.1294
Farm/Kidding Year Interaction	233	-1.5725	0.2751	-5.7153	< 0,0001	-2.1118	-1.0332
Farm/Kidding Year Interaction	234	-0.1798	0.177	-1.0156	0.3098	-0.5267	0.1672
Farm/Kidding Year Interaction	235	0.3962	0.4198	0.9437	0.3453	-0.4266	1.2189
Farm/Kidding Year Interaction	236	-0.397	0.3365	-1.1797	0.2381	-1.0566	0.2626
Farm/Kidding Year Interaction	237	-0.3913	0.3056	-1.2802	0.2005	-0.9903	0.2078
Farm/Kidding Year Interaction	238	-2.1194	0.2464	-8.6003	< 0,0001	-2.6025	-1.6364
Farm/Kidding Year Interaction	239	-0.5411	0.2401	-2.2534	0.0242	-1.0118	-0.0704
Farm/Kidding Year Interaction	240	-0.2295	0.2003	-1.1458	0.2519	-0.6221	0.1631
Farm/Kidding Year Interaction	241	-0.3744	0.235	-1.5928	0.1112	-0.8351	0.0863
Farm/Kidding Year Interaction	242	-0.426	0.1618	-2.633	0.0085	-0.7432	-0.1089
Farm/Kidding Year Interaction	243	-1.2416	0.1553	-7.9959	< 0,0001	-1.5459	-0.9372
Farm/Kidding Year Interaction	244	-0.7105	0.2397	-2.9638	0.003	-1.1804	-0.2406
Farm/Kidding Year Interaction	245	-1.5724	0.1874	-8.3924	< 0,0001	-1.9397	-1.2052
Farm/Kidding Year Interaction	246	0	0
Farm/Kidding Year Interaction	247	-0.1976	0.1657	-1.1928	0.2329	-0.5223	0.1271
Farm/Kidding Year Interaction	248	-1.3171	0.362	-3.6388	0.0003	-2.0266	-0.6077
Farm/Kidding Year Interaction	249	-2.2068	0.2468	-8.9401	< 0,0001	-2.6906	-1.7229
Farm/Kidding Year Interaction	250	-2.1251	0.2233	-9.516	< 0,0001	-2.5629	-1.6874
Farm/Kidding Year Interaction	251	-0.9847	0.2223	-4.429	< 0,0001	-1.4204	-0.5489
Farm/Kidding Year Interaction	252	-1.3767	0.2809	-4.9014	< 0,0001	-1.9272	-0.8262
Farm/Kidding Year Interaction	253	-0.9019	0.322	-2.8008	0.0051	-1.5331	-0.2707
Farm/Kidding Year Interaction	254	-2.036	0.2058	-9.8932	< 0,0001	-2.4394	-1.6327
Farm/Kidding Year Interaction	255	-1.0438	0.2354	-4.4336	< 0,0001	-1.5052	-0.5823
Farm/Kidding Year Interaction	256	-2.0719	0.3708	-5.587	< 0,0001	-2.7988	-1.3451
Farm/Kidding Year Interaction	257	0.2267	0.2192	1.0341	0.3011	-0.203	0.6563
Farm/Kidding Year Interaction	258	-0.6563	0.2704	-2.4271	0.0152	-1.1863	-0.1263
Farm/Kidding Year Interaction	259	-1.2202	0.5313	-2.2968	0.0216	-2.2615	-0.1789
Farm/Kidding Year Interaction	260	-1.3664	0.8679	-1.5744	0.1154	-3.0675	0.3347
Farm/Kidding Year Interaction	261	-0.8543	0.2053	-4.1609	< 0,0001	-1.2567	-0.4519
Farm/Kidding Year Interaction	262	-1.0251	0.2327	-4.4062	< 0,0001	-1.4811	-0.5691
Farm/Kidding Year Interaction	263	-1.1216	0.4291	-2.6136	0.009	-1.9627	-0.2805
Farm/Kidding Year Interaction	264	0.0585	0.266	0.2201	0.8258	-0.4628	0.5799
Farm/Kidding Year Interaction	265	-0.5352	0.4943	-1.0827	0.2789	-1.504	0.4336
Farm/Kidding Year Interaction	266	0.4329	0.2247	1.9269	0.054	-0.0074	0.8733
Farm/Kidding Year Interaction	267	-1.4314	0.2491	-5.7462	< 0,0001	-1.9197	-0.9432
Farm/Kidding Year Interaction	268	-0.2426	0.2489	-0.9747	0.3297	-0.7304	0.2452
Farm/Kidding Year Interaction	269	-0.7553	0.241	-3.1339	0.0017	-1.2277	-0.2829
Farm/Kidding Year Interaction	270	-0.5833	0.1803	-3.235	0.0012	-0.9367	-0.2299
Farm/Kidding Year Interaction	271	-0.2879	0.1736	-1.6578	0.0974	-0.6282	0.0525
Farm/Kidding Year Interaction	272	-0.3347	0.158	-2.1181	0.0342	-0.6443	-0.025
Farm/Kidding Year Interaction	273	0.7887	0.5207	1.5148	0.1298	-0.2318	1.8093
Farm/Kidding Year Interaction	274	-0.6732	0.2252	-2.9892	0.0028	-1.1146	-0.2318
Farm/Kidding Year Interaction	275	-0.7217	0.2085	-3.4614	0.0005	-1.1304	-0.3131
Farm/Kidding Year Interaction	276	-0.7854	0.2243	-3.5015	0.0005	-1.225	-0.3458
Farm/Kidding Year Interaction	277	-0.1245	0.3575	-0.3483	0.7276	-0.8252	0.5762
Farm/Kidding Year Interaction	278	-0.0932	0.1846	-0.5047	0.6138	-0.455	0.2687
Farm/Kidding Year Interaction	279	-0.3699	0.1797	-2.0579	0.0396	-0.7222	-0.0176
Farm/Kidding Year Interaction	280	0.3613	0.5127	0.7047	0.481	-0.6435	1.3661
Farm/Kidding Year Interaction	281	-0.5513	0.8549	-0.6449	0.519	-2.227	1.1243
Farm/Kidding Year Interaction	282	-0.0322	0.4038	-0.0797	0.9364	-0.8237	0.7593
Farm/Kidding Year Interaction	283	-0.5117	0.405	-1.2635	0.2064	-1.3056	0.2821
Farm/Kidding Year Interaction	284	-0.7571	0.7123	-1.0629	0.2878	-2.1532	0.6391
Farm/Kidding Year Interaction	285	-0.6569	0.186	-3.5309	0.0004	-1.0215	-0.2922
Farm/Kidding Year Interaction	286	-0.067	0.2677	-0.2501	0.8025	-0.5917	0.4578
Farm/Kidding Year Interaction	287	-1.5409	0.384	-4.013	< 0,0001	-2.2935	-0.7883
Farm/Kidding Year Interaction	288	0.4581	0.3641	1.2582	0.2083	-0.2556	1.1718
Farm/Kidding Year Interaction	289	0.6201	0.3554	1.7448	0.081	-0.0765	1.3166
Farm/Kidding Year Interaction	290	-1.0847	0.1843	-5.8859	< 0,0001	-1.446	-0.7235
Farm/Kidding Year Interaction	291	-0.679	0.4078	-1.665	0.0959	-1.4783	0.1203
Farm/Kidding Year Interaction	292	-0.7294	0.3323	-2.1952	0.0282	-1.3807	-0.0782
Farm/Kidding Year Interaction	293	-1.0731	0.2363	-4.5407	< 0,0001	-1.5363	-0.6099
Farm/Kidding Year Interaction	294	-0.5934	0.2085	-2.8455	0.0044	-1.0021	-0.1847
Farm/Kidding Year Interaction	295	-0.2763	0.2506	-1.1024	0.2703	-0.7676	0.215
Farm/Kidding Year Interaction	296	0.2361	0.2496	0.9459	0.3442	-0.2531	0.7254
Farm/Kidding Year Interaction	297	-0.4956	0.2538	-1.9526	0.0509	-0.9931	0.0019
Farm/Kidding Year Interaction	298	-0.765	0.3113	-2.4576	0.014	-1.3751	-0.1549
Farm/Kidding Year Interaction	299	-0.5244	0.2688	-1.951	0.0511	-1.0512	0.0024
Farm/Kidding Year Interaction	300	-0.6192	0.1979	-3.1297	0.0018	-1.007	-0.2314
Farm/Kidding Year Interaction	301	-0.6927	0.2517	-2.7518	0.0059	-1.1862	-0.1993
Farm/Kidding Year Interaction	302	-1.0594	0.2474	-4.2821	< 0,0001	-1.5444	-0.5745
Farm/Kidding Year Interaction	303	-0.6615	0.2083	-3.1764	0.0015	-1.0697	-0.2533
Farm/Kidding Year Interaction	304	-1.0372	0.1726	-6.0107	< 0,0001	-1.3755	-0.699
Farm/Kidding Year Interaction	305	-0.9251	0.294	-3.1469	0.0017	-1.5013	-0.3489
Farm/Kidding Year Interaction	306	-0.8626	0.1565	-5.5124	< 0,0001	-1.1692	-0.5559
Farm/Kidding Year Interaction	307	-1.2026	0.2265	-5.3085	< 0,0001	-1.6466	-0.7585
Farm/Kidding Year Interaction	308	-0.7884	0.2234	-3.5285	0.0004	-1.2264	-0.3505
Farm/Kidding Year Interaction	309	-1.4717	0.1821	-8.0821	< 0,0001	-1.8286	-1.1148
Farm/Kidding Year Interaction	310	-1.8203	0.2463	-7.3893	< 0,0001	-2.3031	-1.3374
Farm/Kidding Year Interaction	311	0.9376	0.2499	3.7521	0.0002	0.4478	1.4275
Farm/Kidding Year Interaction	312	-1.0868	0.1944	-5.59	< 0,0001	-1.4679	-0.7057
Farm/Kidding Year Interaction	313	-0.832	0.2792	-2.9802	0.0029	-1.3791	-0.2848
Farm/Kidding Year Interaction	314	-1.4686	0.2116	-6.9418	< 0,0001	-1.8833	-1.054
Farm/Kidding Year Interaction	315	-1.5564	0.2154	-7.2264	< 0,0001	-1.9786	-1.1343
Farm/Kidding Year Interaction	316	-0.8977	0.2389	-3.7581	0.0002	-1.3659	-0.4295
Farm/Kidding Year Interaction	317	-0.6424	0.3065	-2.0959	0.0361	-1.2432	-0.0417
Farm/Kidding Year Interaction	318	-0.415	0.3052	-1.3598	0.1739	-1.0131	0.1832
Farm/Kidding Year Interaction	319	-0.9436	0.277	-3.4068	0.0007	-1.4865	-0.4007
Farm/Kidding Year Interaction	320	-1.196	0.2816	-4.2476	< 0,0001	-1.7479	-0.6441
Farm/Kidding Year Interaction	321	-1.3554	0.4354	-3.113	0.0019	-2.2087	-0.502
Farm/Kidding Year Interaction	322	-0.8307	0.36	-2.3073	0.021	-1.5364	-0.125
Farm/Kidding Year Interaction	323	-1.538	0.2515	-6.1153	< 0,0001	-2.0309	-1.045
Farm/Kidding Year Interaction	324	-0.6431	0.2627	-2.4479	0.0144	-1.158	-0.1282
Farm/Kidding Year Interaction	325	-0.9808	0.1793	-5.4694	< 0,0001	-1.3323	-0.6293
Farm/Kidding Year Interaction	326	-0.6683	0.1758	-3.8017	0.0001	-1.0129	-0.3237
Farm/Kidding Year Interaction	327	-1.2859	0.2429	-5.295	< 0,0001	-1.7619	-0.8099
Farm/Kidding Year Interaction	328	-0.9872	0.3362	-2.9363	0.0033	-1.6461	-0.3282
Farm/Kidding Year Interaction	329	-0.6966	0.2263	-3.0789	0.0021	-1.1401	-0.2532
Farm/Kidding Year Interaction	330	-0.4126	0.2453	-1.6818	0.0926	-0.8934	0.0683
Farm/Kidding Year Interaction	331	-0.9642	0.1798	-5.3636	< 0,0001	-1.3166	-0.6119
Farm/Kidding Year Interaction	332	-0.1555	0.5191	-0.2996	0.7645	-1.1729	0.8619
Farm/Kidding Year Interaction	333	-0.9626	0.2331	-4.1299	< 0,0001	-1.4194	-0.5057
Farm/Kidding Year Interaction	334	-1.2064	0.172	-7.0127	< 0,0001	-1.5436	-0.8692
Farm/Kidding Year Interaction	335	0.3336	0.1496	2.2303	0.0257	0.0404	0.6267
Farm/Kidding Year Interaction	336	-0.3902	0.354	-1.1024	0.2703	-1.0839	0.3036
Farm/Kidding Year Interaction	337	-1.1139	0.2155	-5.1686	< 0,0001	-1.5363	-0.6915
Farm/Kidding Year Interaction	338	-0.9651	0.2153	-4.4829	< 0,0001	-1.3871	-0.5431
Farm/Kidding Year Interaction	339	-1.0597	0.33	-3.2112	0.0013	-1.7065	-0.4129
Farm/Kidding Year Interaction	340	-0.4836	0.4146	-1.1663	0.2435	-1.2962	0.3291
Farm/Kidding Year Interaction	341	-0.2215	0.2491	-0.8894	0.3738	-0.7097	0.2666
Farm/Kidding Year Interaction	342	-0.8389	0.2168	-3.8685	0.0001	-1.2639	-0.4139
Farm/Kidding Year Interaction	343	-0.2365	0.2717	-0.8703	0.3842	-0.769	0.2961
Farm/Kidding Year Interaction	344	-0.7499	0.3905	-1.9201	0.0549	-1.5154	0.0156
Farm/Kidding Year Interaction	345	-0.7092	0.6371	-1.1131	0.2657	-1.958	0.5396
Farm/Kidding Year Interaction	346	-0.9078	0.6152	-1.4757	0.14	-2.1135	0.298
Farm/Kidding Year Interaction	347	-0.5936	0.273	-2.1744	0.0297	-1.1288	-0.0585
Farm/Kidding Year Interaction	348	-0.6264	0.3454	-1.8137	0.0697	-1.3033	0.0505
Farm/Kidding Year Interaction	349	-0.064	0.2365	-0.2707	0.7866	-0.5275	0.3995
Farm/Kidding Year Interaction	350	0.0544	0.3427	0.1589	0.8738	-0.6172	0.7261
Farm/Kidding Year Interaction	351	0.4162	0.3139	1.3259	0.1849	-0.199	1.0314
Farm/Kidding Year Interaction	352	0.6584	0.6034	1.0912	0.2752	-0.5242	1.8411
Farm/Kidding Year Interaction	353	-0.9996	0.3771	-2.6504	0.008	-1.7388	-0.2604
Farm/Kidding Year Interaction	354	-2.1209	0.308	-6.8868	< 0,0001	-2.7246	-1.5173
Farm/Kidding Year Interaction	355	-1.4897	0.3267	-4.5593	< 0,0001	-2.1302	-0.8493
Farm/Kidding Year Interaction	356	-1.4302	0.3171	-4.5103	< 0,0001	-2.0518	-0.8087
Farm/Kidding Year Interaction	357	-1.4098	0.443	-3.1825	0.0015	-2.278	-0.5415
Farm/Kidding Year Interaction	358	-1.6426	0.1861	-8.8251	< 0,0001	-2.0074	-1.2777
Farm/Kidding Year Interaction	359	0.4367	0.5992	0.7287	0.4662	-0.7378	1.6111
Farm/Kidding Year Interaction	360	0	0
Farm/Kidding Year Interaction	361	-1.1267	0.1571	-7.1729	< 0,0001	-1.4346	-0.8189
Farm/Kidding Year Interaction	362	0.0153	0.3131	0.0489	0.961	-0.5984	0.629
Farm/Kidding Year Interaction	363	0.0513	0.3392	0.1513	0.8797	-0.6135	0.7161
Farm/Kidding Year Interaction	364	-1.482	0.237	-6.2537	< 0,0001	-1.9465	-1.0175
Farm/Kidding Year Interaction	365	-1.3766	0.18	-7.6467	< 0,0001	-1.7294	-1.0237
Farm/Kidding Year Interaction	366	-0.2517	0.5212	-0.483	0.6291	-1.2732	0.7697
Farm/Kidding Year Interaction	367	-1.3871	0.2282	-6.0794	< 0,0001	-1.8343	-0.9399
Farm/Kidding Year Interaction	368	-1.2727	0.2434	-5.2286	< 0,0001	-1.7498	-0.7956
Farm/Kidding Year Interaction	369	-0.8425	0.1772	-4.7538	< 0,0001	-1.1899	-0.4951
Farm/Kidding Year Interaction	370	-1.0421	0.4254	-2.4498	0.0143	-1.8758	-0.2083
Farm/Kidding Year Interaction	371	-0.5874	0.2223	-2.6419	0.0082	-1.0231	-0.1516
Farm/Kidding Year Interaction	372	-0.8305	0.4171	-1.9913	0.0465	-1.648	-0.0131
Farm/Kidding Year Interaction	373	-1.6002	0.2164	-7.3937	< 0,0001	-2.0244	-1.176
Farm/Kidding Year Interaction	374	-1.3389	0.2339	-5.7233	< 0,0001	-1.7974	-0.8804
Farm/Kidding Year Interaction	375	-0.9603	0.2264	-4.2417	< 0,0001	-1.404	-0.5165
Farm/Kidding Year Interaction	376	-0.313	0.2692	-1.1627	0.2449	-0.8406	0.2146
Farm/Kidding Year Interaction	377	-1.2031	0.2137	-5.629	< 0,0001	-1.622	-0.7842
Farm/Kidding Year Interaction	378	-0.1181	0.2493	-0.4737	0.6357	-0.6068	0.3706
Farm/Kidding Year Interaction	379	-0.8075	0.3359	-2.4038	0.0162	-1.466	-0.1491
Farm/Kidding Year Interaction	380	0	0
Farm/Kidding Year Interaction	381	-2.1483	0.2765	-7.7696	< 0,0001	-2.6902	-1.6063
Farm/Kidding Year Interaction	382	-1.5661	0.3519	-4.4505	< 0,0001	-2.2558	-0.8764
Farm/Kidding Year Interaction	383	0	0
Farm/Kidding Year Interaction	384	-1.3563	0.237	-5.722	< 0,0001	-1.8209	-0.8917
Farm/Kidding Year Interaction	385	-0.4621	0.3658	-1.2632	0.2065	-1.1791	0.2549
Farm/Kidding Year Interaction	386	-0.5642	0.6024	-0.9365	0.349	-1.745	0.6166
Farm/Kidding Year Interaction	387	0	0
Farm/Kidding Year Interaction	388	-1.5738	0.6151	-2.5585	0.0105	-2.7794	-0.3681
Farm/Kidding Year Interaction	389	-1.0479	0.2203	-4.7558	< 0,0001	-1.4798	-0.616
Farm/Kidding Year Interaction	390	-1.2335	0.2167	-5.6914	< 0,0001	-1.6583	-0.8087
Farm/Kidding Year Interaction	391	-1.1908	0.1973	-6.035	< 0,0001	-1.5776	-0.8041
Farm/Kidding Year Interaction	392	-2.1295	0.9255	-2.301	0.0214	-3.9434	-0.3155
Farm/Kidding Year Interaction	393	-1.016	0.2723	-3.7317	0.0002	-1.5497	-0.4824
Farm/Kidding Year Interaction	394	-1.3074	0.2284	-5.7253	< 0,0001	-1.755	-0.8598
Farm/Kidding Year Interaction	395	-1.1767	0.661	-1.7802	0.075	-2.4722	0.1188
Farm/Kidding Year Interaction	396	0	0
Farm/Kidding Year Interaction	397	-0.822	0.2819	-2.9155	0.0036	-1.3746	-0.2694
Farm/Kidding Year Interaction	398	-0.0715	0.6118	-0.1168	0.907	-1.2707	1.1278
Farm/Kidding Year Interaction	399	-0.6013	0.6617	-0.9087	0.3635	-1.8982	0.6957
Farm/Kidding Year Interaction	400	-1.5383	0.3086	-4.9844	< 0,0001	-2.1432	-0.9334
Farm/Kidding Year Interaction	401	-1.4102	0.4547	-3.1012	0.0019	-2.3015	-0.5189
Farm/Kidding Year Interaction	402	-0.8058	0.2532	-3.1822	0.0015	-1.3022	-0.3095
Farm/Kidding Year Interaction	403	0	0
Farm/Kidding Year Interaction	404	-1.3805	0.2317	-5.9568	< 0,0001	-1.8347	-0.9262
Farm/Kidding Year Interaction	405	0	0
Farm/Kidding Year Interaction	406	0	0
Farm/Kidding Year Interaction	407	0	0
Farm/Kidding Year Interaction	408	0	0
Farm/Kidding Year Interaction	409	0	0
Farm/Kidding Year Interaction	410	0	0
Farm/Kidding Year Interaction	411	0	0
Farm/Kidding Year Interaction	412	0	0
Farm/Kidding Year Interaction	413	0	0
Farm/Kidding Year Interaction	414	0	0
Farm/Kidding Year Interaction	415	0	0
Farm/Kidding Year Interaction	416	0	0
Farm/Kidding Year Interaction	417	0	0
Farm/Kidding Year Interaction	418	0	0
Farm/Kidding Year Interaction	419	0	0
Farm/Kidding Year Interaction	420	0	0
Farm/Kidding Year Interaction	421	0	0
Farm/Kidding Year Interaction	422	0	0
Farm/Kidding Year Interaction	423	0	0
Farm/Kidding Year Interaction	424	0	0
Farm/Kidding Year Interaction	425	0	0
Farm/Kidding Year Interaction	426	0	0
Farm/Kidding Year Interaction	427	0	0
Farm/Kidding Year Interaction	428	0	0
Farm/Kidding Year Interaction	429	0	0
Farm/Kidding Year Interaction	430	0	0
Farm/Kidding Year Interaction	431	0	0
Farm/Kidding Year Interaction	432	0	0
Farm/Kidding Year Interaction	433	0	0
Farm/Kidding Year Interaction	434	0	0
Farm/Kidding Year Interaction	435	0	0
Farm/Kidding Year Interaction	436	0	0
Farm/Kidding Year Interaction	437	0	0
Farm/Kidding Year Interaction	438	0	0
Farm/Kidding Year Interaction	439	0	0
Farm/Kidding Year Interaction	440	0	0
Farm/Kidding Year Interaction	441	0	0
Farm/Kidding Year Interaction	442	0	0
Farm/Kidding Year Interaction	443	0	0
Farm/Kidding Year Interaction	444	0	0
Farm/Kidding Year Interaction	445	0	0
Farm/Kidding Year Interaction	446	0	0
Farm/Kidding Year Interaction	447	0	0
Farm/Kidding Year Interaction	448	0	0
Farm/Kidding Year Interaction	449	0	0
Farm/Kidding Year Interaction	450	0	0
Farm/Kidding Year Interaction	451	0	0
Farm/Kidding Year Interaction	452	0	0
Farm/Kidding Year Interaction	453	0	0
Farm/Kidding Year Interaction	454	0	0
Farm/Kidding Year Interaction	455	0	0
Farm/Kidding Year Interaction	456	0	0
Farm/Kidding Year Interaction	457	0	0
Farm/Kidding Year Interaction	458	0	0
Farm/Kidding Year Interaction	459	0	0
Farm/Kidding Year Interaction	460	0	0
Farm/Kidding Year Interaction	461	0	0
Farm/Kidding Year Interaction	462	0	0
Farm/Kidding Year Interaction	463	0	0
Farm/Kidding Year Interaction	464	0	0
Farm/Kidding Year Interaction	465	0	0
Farm/Kidding Year Interaction	466	0	0
Farm/Kidding Year Interaction	467	0	0
Farm/Kidding Year Interaction	468	0	0
Farm/Kidding Year Interaction	469	0	0
Farm/Kidding Year Interaction	470	0	0
Farm/Kidding Year Interaction	471	0	0
Farm/Kidding Year Interaction	472	0	0
Farm/Kidding Year Interaction	473	0	0
Farm/Kidding Year Interaction	474	0	0
Farm/Kidding Year Interaction	475	0	0
Farm/Kidding Year Interaction	476	0	0

## Sheet: Rump Width
Parameter/Fixed Effect/Covariate	Level	Value	Standard error	t	Pr > |t|	Lower bound (95%)	Upper bound (95%)
Intercept	Intercept	17.5571	0.3212	54.6672	< 0,0001	16.9276	18.1866
Age (in years)	Age (in years)	0.07	0.0033	21.372	< 0,0001	0.0636	0.0764
Days in Milk	Days in Milk	0.0026	0.0001	42.8912	< 0,0001	0.0025	0.0027
Farm	1	0.1864	0.3099	0.6016	0.5474	-0.4209	0.7938
Farm	2	-0.4135	0.3362	-1.23	0.2187	-1.0725	0.2454
Farm	3	-0.4472	0.3475	-1.2869	0.1981	-1.1284	0.2339
Farm	4	0.4339	0.3103	1.3982	0.1621	-0.1744	1.0422
Farm	5	-0.3926	0.3234	-1.2139	0.2248	-1.0264	0.2413
Farm	6	-1.7	0.7454	-2.2805	0.0226	-3.1611	-0.2389
Farm	7	-0.4262	0.3542	-1.2032	0.2289	-1.1205	0.2681
Farm	8	-0.1587	0.3096	-0.5127	0.6082	-0.7655	0.4481
Farm	9	-0.7728	0.3125	-2.4732	0.0134	-1.3852	-0.1603
Farm	10	0.0469	0.3305	0.142	0.8871	-0.6009	0.6947
Farm	11	-0.774	0.563	-1.3749	0.1692	-1.8775	0.3294
Farm	12	-0.3917	0.7368	-0.5315	0.595	-1.8358	1.0525
Farm	13	0.6812	0.3159	2.1561	0.0311	0.062	1.3004
Farm	14	0.7971	0.5632	1.4153	0.157	-0.3068	1.901
Farm	15	0.0798	0.375	0.2129	0.8314	-0.6552	0.8149
Farm	16	-0.6446	0.3305	-1.9503	0.0511	-1.2923	0.0032
Farm	17	-1.5079	0.574	-2.6269	0.0086	-2.6331	-0.3828
Farm	18	0.3334	0.3318	1.0049	0.3149	-0.3169	0.9837
Farm	19	0.209	0.3755	0.5565	0.5778	-0.527	0.9449
Farm	20	-0.0052	0.3748	-0.0138	0.989	-0.7397	0.7294
Farm	21	-0.4386	0.3346	-1.3109	0.1899	-1.0944	0.2172
Farm	22	0.5823	0.7368	0.7902	0.4294	-0.8619	2.0265
Farm	23	-0.8207	0.3342	-2.4559	0.0141	-1.4756	-0.1657
Farm	24	-0.5201	0.333	-1.5621	0.1183	-1.1728	0.1325
Farm	25	0.087	0.3586	0.2427	0.8082	-0.6159	0.79
Farm	26	0.3365	0.4078	0.8251	0.4093	-0.4628	1.1357
Farm	27	0.0923	0.5625	0.1642	0.8696	-1.0101	1.1948
Farm	28	0.142	0.4071	0.3488	0.7273	-0.656	0.9399
Farm	29	0.8219	0.3319	2.4762	0.0133	0.1713	1.4724
Farm	30	-0.0091	0.3315	-0.0276	0.978	-0.6588	0.6405
Farm	31	0.3794	0.3586	1.0579	0.2901	-0.3235	1.0823
Farm	32	-0.0946	0.3475	-0.2721	0.7855	-0.7757	0.5866
Farm	33	0.1987	0.4516	0.44	0.6599	-0.6864	1.0839
Farm	34	-0.2785	0.394	-0.7068	0.4797	-1.0506	0.4937
Farm	35	-1.2884	0.563	-2.2885	0.0221	-2.3918	-0.185
Farm	36	-0.4732	0.3301	-1.4334	0.1518	-1.1202	0.1739
Farm	37	-0.4862	0.7368	-0.6598	0.5094	-1.9304	0.958
Farm	38	-0.5821	0.3503	-1.6617	0.0966	-1.2686	0.1045
Farm	39	-0.3922	0.7368	-0.5323	0.5945	-1.8364	1.052
Farm	40	0.3153	0.324	0.973	0.3306	-0.3198	0.9504
Farm	41	-0.0764	0.3104	-0.2463	0.8055	-0.6848	0.532
Farm	42	-0.7462	0.4645	-1.6064	0.1082	-1.6567	0.1643
Farm	43	0.3444	0.4255	0.8094	0.4183	-0.4896	1.1784
Farm	44	0.206	0.3305	0.6232	0.5331	-0.4418	0.8537
Farm	45	-0.0726	0.3121	-0.2326	0.8161	-0.6843	0.5391
Farm	46	-0.8546	0.563	-1.5181	0.129	-1.9581	0.2488
Farm	47	0.3489	0.384	0.9087	0.3635	-0.4037	1.1016
Farm	48	-0.3798	0.3684	-1.0308	0.3026	-1.1019	0.3423
Farm	49	-0.7019	0.3294	-2.1311	0.0331	-1.3475	-0.0563
Farm	50	-0.1591	0.3473	-0.4581	0.6469	-0.8399	0.5217
Farm	51	-0.3992	0.3057	-1.3059	0.1916	-0.9984	0.2
Farm	52	0.1184	0.3944	0.3002	0.764	-0.6546	0.8913
Farm	53	-0.4856	0.369	-1.3161	0.1881	-1.2089	0.2376
Farm	54	-0.0489	0.4252	-0.115	0.9084	-0.8823	0.7845
Farm	55	-0.8634	0.3794	-2.2757	0.0229	-1.607	-0.1198
Farm	56	-0.3641	0.3333	-1.0922	0.2748	-1.0174	0.2893
Farm	57	0.1068	0.324	0.3298	0.7416	-0.5282	0.7419
Farm	58	0.6845	0.7368	0.929	0.3529	-0.7597	2.1287
Farm	59	-0.544	0.3283	-1.6569	0.0975	-1.1875	0.0995
Farm	60	0.6017	0.4915	1.2241	0.2209	-0.3617	1.5651
Farm	61	0.3726	0.324	1.15	0.2502	-0.2625	1.0076
Farm	62	0.431	0.3332	1.2935	0.1959	-0.2221	1.084
Farm	63	-0.0871	0.4912	-0.1772	0.8593	-1.0499	0.8757
Farm	64	0.1714	0.3836	0.4469	0.6549	-0.5804	0.9233
Farm	65	0.1727	0.3686	0.4686	0.6394	-0.5497	0.8951
Farm	66	-0.0063	0.3377	-0.0188	0.985	-0.6683	0.6556
Farm	67	-0.0646	0.5631	-0.1148	0.9086	-1.1682	1.039
Farm	68	0.2535	0.3297	0.7688	0.442	-0.3928	0.8998
Farm	69	1.4726	0.7369	1.9984	0.0457	0.0283	2.9169
Farm	70	-1.2359	0.5035	-2.4545	0.0141	-2.2229	-0.249
Farm	71	0.5464	0.3937	1.3879	0.1652	-0.2252	1.3181
Farm	72	1.2669	0.4259	2.9745	0.0029	0.4321	2.1018
Farm	73	-1.9867	0.3541	-5.6102	< 0,0001	-2.6808	-1.2926
Farm	74	1.0459	0.4516	2.3159	0.0206	0.1607	1.9311
Farm	75	-0.486	0.7368	-0.6596	0.5095	-1.9302	0.9582
Farm	76	-0.4034	0.3185	-1.2664	0.2054	-1.0277	0.221
Farm	77	-1.3865	0.7368	-1.8817	0.0599	-2.8307	0.0577
Farm	78	-0.6033	0.5736	-1.0518	0.2929	-1.7276	0.5209
Farm	79	-0.5619	0.3285	-1.7107	0.0871	-1.2058	0.0819
Farm	80	-2.4998	0.4093	-6.1079	< 0,0001	-3.3019	-1.6976
Farm	81	0.0491	0.4516	0.1088	0.9134	-0.8361	0.9343
Farm	82	-2.2554	0.7453	-3.0262	0.0025	-3.7162	-0.7946
Farm	83	0.3017	0.3248	0.929	0.3529	-0.3349	0.9384
Farm	84	0.5417	0.3143	1.7236	0.0848	-0.0743	1.1577
Farm	85	-0.0534	0.3227	-0.1655	0.8686	-0.6858	0.5791
Farm	86	0	0
Sex	Buck	1.7994	0.1092	16.4843	< 0,0001	1.5855	2.0134
Sex	Doe	0	0
Lactation Stage/Maturity	Primiparous	-0.4221	0.0109	-38.8196	< 0,0001	-0.4434	-0.4008
Lactation Stage/Maturity	Multiparous	0	0
Lactation Stage/Maturity	Buckling	-0.8075	0.04	-20.2052	< 0,0001	-0.8858	-0.7292
Lactation Stage/Maturity	Buck	0	0
Kidding Month	January	-0.2232	0.0217	-10.2687	< 0,0001	-0.2658	-0.1806
Kidding Month	February	-0.2588	0.022	-11.7648	< 0,0001	-0.302	-0.2157
Kidding Month	March	-0.2774	0.0228	-12.1498	< 0,0001	-0.3222	-0.2327
Kidding Month	April	-0.1917	0.0223	-8.6132	< 0,0001	-0.2353	-0.148
Kidding Month	May	-0.1976	0.0237	-8.3523	< 0,0001	-0.244	-0.1513
Kidding Month	June	-0.1345	0.0246	-5.4551	< 0,0001	-0.1828	-0.0861
Kidding Month	July	-0.054	0.029	-1.8642	0.0623	-0.1108	0.0028
Kidding Month	August	-0.0112	0.0233	-0.4798	0.6314	-0.0568	0.0344
Kidding Month	September	-0.0611	0.0238	-2.5655	0.0103	-0.1078	-0.0144
Kidding Month	October	-0.0631	0.0227	-2.7799	0.0054	-0.1075	-0.0186
Kidding Month	November	-0.0591	0.0213	-2.7801	0.0054	-0.1007	-0.0174
Kidding Month	December	0	0
Kidding Season	Winter	0	0
Kidding Season	Spring	0	0
Kidding Season	Summer	0	0
Kidding Season	Autumn	0	0
Farm/Kidding Year Interaction	1	-1.8208	0.3289	-5.5357	< 0,0001	-2.4654	-1.1761
Farm/Kidding Year Interaction	2	-1.4166	0.2793	-5.0719	< 0,0001	-1.964	-0.8691
Farm/Kidding Year Interaction	3	-1.0379	0.2623	-3.9574	< 0,0001	-1.5519	-0.5238
Farm/Kidding Year Interaction	4	-1.5644	0.1549	-10.1003	< 0,0001	-1.868	-1.2608
Farm/Kidding Year Interaction	5	-2.286	0.2517	-9.0821	< 0,0001	-2.7793	-1.7926
Farm/Kidding Year Interaction	6	-0.2797	0.5734	-0.4879	0.6256	-1.4036	0.8441
Farm/Kidding Year Interaction	7	-1.2291	0.6233	-1.972	0.0486	-2.4507	-0.0074
Farm/Kidding Year Interaction	8	-3.1991	0.69	-4.6363	< 0,0001	-4.5515	-1.8467
Farm/Kidding Year Interaction	9	-7.7232	0.8382	-9.2145	< 0,0001	-9.366	-6.0804
Farm/Kidding Year Interaction	10	-1.7296	0.148	-11.6832	< 0,0001	-2.0198	-1.4394
Farm/Kidding Year Interaction	11	0	0
Farm/Kidding Year Interaction	12	-2.4941	0.2222	-11.2238	< 0,0001	-2.9296	-2.0586
Farm/Kidding Year Interaction	13	-4.5226	0.6873	-6.58	< 0,0001	-5.8698	-3.1755
Farm/Kidding Year Interaction	14	-0.8427	0.3288	-2.5627	0.0104	-1.4872	-0.1982
Farm/Kidding Year Interaction	15	-3.1143	0.7445	-4.1829	< 0,0001	-4.5737	-1.655
Farm/Kidding Year Interaction	16	0	0
Farm/Kidding Year Interaction	17	-3.0595	0.6858	-4.4611	< 0,0001	-4.4037	-1.7153
Farm/Kidding Year Interaction	18	-3.055	0.7015	-4.3549	< 0,0001	-4.43	-1.68
Farm/Kidding Year Interaction	19	-0.8571	0.7342	-1.1673	0.2431	-2.2962	0.582
Farm/Kidding Year Interaction	20	-1.1499	0.1362	-8.4454	< 0,0001	-1.4168	-0.883
Farm/Kidding Year Interaction	21	-1.6766	0.2358	-7.1117	< 0,0001	-2.1387	-1.2145
Farm/Kidding Year Interaction	22	-0.85	0.1398	-6.0796	< 0,0001	-1.124	-0.576
Farm/Kidding Year Interaction	23	-0.3314	0.6873	-0.4822	0.6297	-1.6784	1.0157
Farm/Kidding Year Interaction	24	-1.3182	0.2033	-6.483	< 0,0001	-1.7168	-0.9197
Farm/Kidding Year Interaction	25	-1.0962	0.1868	-5.8692	< 0,0001	-1.4623	-0.7301
Farm/Kidding Year Interaction	26	-1.5824	0.2135	-7.4102	< 0,0001	-2.001	-1.1639
Farm/Kidding Year Interaction	27	0.5092	0.4641	1.0971	0.2726	-0.4005	1.4189
Farm/Kidding Year Interaction	28	-2.2477	0.5112	-4.397	< 0,0001	-3.2497	-1.2458
Farm/Kidding Year Interaction	29	-0.6951	0.1562	-4.4509	< 0,0001	-1.0012	-0.389
Farm/Kidding Year Interaction	30	-1.0142	0.2004	-5.0599	< 0,0001	-1.407	-0.6213
Farm/Kidding Year Interaction	31	-1.1864	0.1371	-8.6511	< 0,0001	-1.4551	-0.9176
Farm/Kidding Year Interaction	32	0	0
Farm/Kidding Year Interaction	33	-2.0553	0.1839	-11.1758	< 0,0001	-2.4157	-1.6948
Farm/Kidding Year Interaction	34	-2.839	0.4956	-5.7287	< 0,0001	-3.8103	-1.8677
Farm/Kidding Year Interaction	35	-0.8174	0.1775	-4.6042	< 0,0001	-1.1654	-0.4694
Farm/Kidding Year Interaction	36	-0.4734	0.183	-2.5875	0.0097	-0.832	-0.1148
Farm/Kidding Year Interaction	37	-2.8506	0.5051	-5.6435	< 0,0001	-3.8406	-1.8606
Farm/Kidding Year Interaction	38	-0.9156	0.1473	-6.2169	< 0,0001	-1.2043	-0.627
Farm/Kidding Year Interaction	39	-1.5668	0.4955	-3.1619	0.0016	-2.538	-0.5956
Farm/Kidding Year Interaction	40	-0.5727	0.1692	-3.3838	0.0007	-0.9044	-0.241
Farm/Kidding Year Interaction	41	-0.8801	0.2096	-4.1997	< 0,0001	-1.2908	-0.4693
Farm/Kidding Year Interaction	42	-0.8123	0.2544	-3.1931	0.0014	-1.3109	-0.3137
Farm/Kidding Year Interaction	43	-1.4175	0.5371	-2.6393	0.0083	-2.4702	-0.3648
Farm/Kidding Year Interaction	44	-1.1913	0.9512	-1.2523	0.2105	-3.0557	0.6732
Farm/Kidding Year Interaction	45	-0.8455	0.1879	-4.4996	< 0,0001	-1.2138	-0.4772
Farm/Kidding Year Interaction	46	-2.025	0.5079	-3.9868	< 0,0001	-3.0205	-1.0294
Farm/Kidding Year Interaction	47	0.5617	0.8236	0.682	0.4952	-1.0525	2.1759
Farm/Kidding Year Interaction	48	-1.2755	0.1648	-7.7389	< 0,0001	-1.5986	-0.9525
Farm/Kidding Year Interaction	49	-1.9199	0.2533	-7.5781	< 0,0001	-2.4164	-1.4233
Farm/Kidding Year Interaction	50	-0.3403	0.1937	-1.7568	0.079	-0.72	0.0394
Farm/Kidding Year Interaction	51	-0.1667	0.1958	-0.8514	0.3946	-0.5504	0.2171
Farm/Kidding Year Interaction	52	-0.8168	0.1446	-5.6468	< 0,0001	-1.1003	-0.5333
Farm/Kidding Year Interaction	53	0.1897	0.3739	0.5073	0.612	-0.5432	0.9225
Farm/Kidding Year Interaction	54	-1.1172	0.1938	-5.7643	< 0,0001	-1.4971	-0.7373
Farm/Kidding Year Interaction	55	-0.8996	0.2076	-4.3324	< 0,0001	-1.3066	-0.4926
Farm/Kidding Year Interaction	56	0	0
Farm/Kidding Year Interaction	57	-0.5591	0.157	-3.5599	0.0004	-0.8669	-0.2513
Farm/Kidding Year Interaction	58	-0.8372	0.1752	-4.7775	< 0,0001	-1.1807	-0.4937
Farm/Kidding Year Interaction	59	-1.2769	0.2691	-4.7451	< 0,0001	-1.8043	-0.7494
Farm/Kidding Year Interaction	60	-0.2918	0.221	-1.3204	0.1867	-0.7251	0.1414
Farm/Kidding Year Interaction	61	-0.6533	0.2143	-3.0482	0.0023	-1.0735	-0.2332
Farm/Kidding Year Interaction	62	-1.1405	0.3669	-3.1087	0.0019	-1.8596	-0.4214
Farm/Kidding Year Interaction	63	-0.9188	0.1432	-6.4173	< 0,0001	-1.1994	-0.6382
Farm/Kidding Year Interaction	64	-0.9613	0.3089	-3.1119	0.0019	-1.5667	-0.3558
Farm/Kidding Year Interaction	65	-0.2913	0.3117	-0.9346	0.35	-0.9023	0.3196
Farm/Kidding Year Interaction	66	-0.9227	0.1904	-4.8455	< 0,0001	-1.296	-0.5495
Farm/Kidding Year Interaction	67	0	0
Farm/Kidding Year Interaction	68	-1.1132	0.1567	-7.1049	< 0,0001	-1.4203	-0.8061
Farm/Kidding Year Interaction	69	-0.7825	0.1488	-5.2594	< 0,0001	-1.0741	-0.4909
Farm/Kidding Year Interaction	70	-1.5813	0.4973	-3.1797	0.0015	-2.556	-0.6066
Farm/Kidding Year Interaction	71	-0.9707	0.3584	-2.7081	0.0068	-1.6733	-0.2682
Farm/Kidding Year Interaction	72	-1.336	0.3618	-3.6928	0.0002	-2.0452	-0.6269
Farm/Kidding Year Interaction	73	-1.7571	0.593	-2.9633	0.003	-2.9193	-0.5949
Farm/Kidding Year Interaction	74	-1.3548	0.2388	-5.6733	< 0,0001	-1.8228	-0.8867
Farm/Kidding Year Interaction	75	-1.4166	0.2284	-6.2018	< 0,0001	-1.8643	-0.9689
Farm/Kidding Year Interaction	76	-2.6348	0.3752	-7.0224	< 0,0001	-3.3702	-1.8994
Farm/Kidding Year Interaction	77	0	0
Farm/Kidding Year Interaction	78	-1.1057	0.1676	-6.5971	< 0,0001	-1.4342	-0.7772
Farm/Kidding Year Interaction	79	-1.0125	0.1443	-7.0142	< 0,0001	-1.2954	-0.7296
Farm/Kidding Year Interaction	80	-1.8295	0.4088	-4.4747	< 0,0001	-2.6308	-1.0281
Farm/Kidding Year Interaction	81	-1.6411	0.4065	-4.0367	< 0,0001	-2.4379	-0.8442
Farm/Kidding Year Interaction	82	-2.4604	0.7851	-3.1339	0.0017	-3.9993	-0.9216
Farm/Kidding Year Interaction	83	-4.7633	0.6261	-7.6082	< 0,0001	-5.9905	-3.5362
Farm/Kidding Year Interaction	84	-0.3096	0.1942	-1.5944	0.1109	-0.6901	0.071
Farm/Kidding Year Interaction	85	-1.156	0.1888	-6.1236	< 0,0001	-1.526	-0.786
Farm/Kidding Year Interaction	86	0	0
Farm/Kidding Year Interaction	87	-0.1562	0.6888	-0.2268	0.8206	-1.5063	1.1939
Farm/Kidding Year Interaction	88	-0.0801	0.7062	-0.1134	0.9097	-1.4643	1.3042
Farm/Kidding Year Interaction	89	-0.9624	0.2532	-3.8003	0.0001	-1.4587	-0.466
Farm/Kidding Year Interaction	90	-1.1598	0.1912	-6.0657	< 0,0001	-1.5346	-0.7851
Farm/Kidding Year Interaction	91	-1.2936	0.1919	-6.7425	< 0,0001	-1.6696	-0.9176
Farm/Kidding Year Interaction	92	-0.743	0.1313	-5.66	< 0,0001	-1.0003	-0.4857
Farm/Kidding Year Interaction	93	-0.6342	0.1253	-5.0607	< 0,0001	-0.8798	-0.3885
Farm/Kidding Year Interaction	94	-3.2448	0.6858	-4.7313	< 0,0001	-4.589	-1.9006
Farm/Kidding Year Interaction	95	-1.7214	0.4923	-3.497	0.0005	-2.6863	-0.7566
Farm/Kidding Year Interaction	96	-1.0839	0.7449	-1.4551	0.1457	-2.544	0.3761
Farm/Kidding Year Interaction	97	-0.6818	0.4477	-1.5228	0.1278	-1.5593	0.1958
Farm/Kidding Year Interaction	98	-0.4787	0.2393	-2.0006	0.0454	-0.9476	-0.0097
Farm/Kidding Year Interaction	99	-0.8075	0.2651	-3.0465	0.0023	-1.3271	-0.288
Farm/Kidding Year Interaction	100	-0.8197	0.2647	-3.0964	0.002	-1.3386	-0.3008
Farm/Kidding Year Interaction	101	-0.4901	0.1892	-2.5905	0.0096	-0.8609	-0.1193
Farm/Kidding Year Interaction	102	-1.9061	0.3571	-5.3372	< 0,0001	-2.6061	-1.2061
Farm/Kidding Year Interaction	103	-2.0169	0.3658	-5.5139	< 0,0001	-2.7338	-1.3
Farm/Kidding Year Interaction	104	-2.4023	0.7602	-3.16	0.0016	-3.8924	-0.9123
Farm/Kidding Year Interaction	105	-0.3278	0.1463	-2.2405	0.0251	-0.6146	-0.041
Farm/Kidding Year Interaction	106	-0.0247	0.1438	-0.1715	0.8639	-0.3066	0.2572
Farm/Kidding Year Interaction	107	-2.1258	0.6894	-3.0835	0.002	-3.477	-0.7745
Farm/Kidding Year Interaction	108	-0.5987	0.4134	-1.4484	0.1475	-1.4089	0.2115
Farm/Kidding Year Interaction	109	-1.5641	0.1562	-10.0164	< 0,0001	-1.8702	-1.2581
Farm/Kidding Year Interaction	110	-0.9104	0.1362	-6.685	< 0,0001	-1.1773	-0.6435
Farm/Kidding Year Interaction	111	-2.645	0.4121	-6.4183	< 0,0001	-3.4528	-1.8373
Farm/Kidding Year Interaction	112	-0.2315	0.1889	-1.2258	0.2203	-0.6017	0.1387
Farm/Kidding Year Interaction	113	0.1516	0.3477	0.4362	0.6627	-0.5298	0.833
Farm/Kidding Year Interaction	114	-0.5914	0.1681	-3.5177	0.0004	-0.9209	-0.2619
Farm/Kidding Year Interaction	115	-0.9744	0.2882	-3.3814	0.0007	-1.5392	-0.4096
Farm/Kidding Year Interaction	116	-1.7149	0.683	-2.511	0.012	-3.0536	-0.3763
Farm/Kidding Year Interaction	117	-2.4989	0.9571	-2.6109	0.009	-4.3748	-0.623
Farm/Kidding Year Interaction	118	-0.5585	0.2107	-2.6511	0.008	-0.9714	-0.1456
Farm/Kidding Year Interaction	119	-1.0592	0.2408	-4.3979	< 0,0001	-1.5312	-0.5871
Farm/Kidding Year Interaction	120	-0.7264	0.3064	-2.3706	0.0178	-1.3269	-0.1258
Farm/Kidding Year Interaction	121	-3.9191	0.3567	-10.9866	< 0,0001	-4.6182	-3.2199
Farm/Kidding Year Interaction	122	-0.6176	0.3014	-2.0487	0.0405	-1.2084	-0.0267
Farm/Kidding Year Interaction	123	-1.8504	0.3232	-5.7261	< 0,0001	-2.4838	-1.217
Farm/Kidding Year Interaction	124	-3.0945	0.3449	-8.9715	< 0,0001	-3.7706	-2.4185
Farm/Kidding Year Interaction	125	-3.8163	0.5703	-6.6916	< 0,0001	-4.9341	-2.6985
Farm/Kidding Year Interaction	126	-0.844	0.3021	-2.7941	0.0052	-1.4361	-0.2519
Farm/Kidding Year Interaction	127	-0.7411	0.2769	-2.6761	0.0075	-1.2838	-0.1983
Farm/Kidding Year Interaction	128	-1.5351	0.6839	-2.2447	0.0248	-2.8755	-0.1947
Farm/Kidding Year Interaction	129	-0.6244	0.2481	-2.517	0.0118	-1.1106	-0.1382
Farm/Kidding Year Interaction	130	-1.2102	0.3673	-3.2946	0.001	-1.9302	-0.4902
Farm/Kidding Year Interaction	131	-0.409	0.2444	-1.6732	0.0943	-0.8881	0.0701
Farm/Kidding Year Interaction	132	-0.0204	0.1912	-0.1069	0.9149	-0.3952	0.3543
Farm/Kidding Year Interaction	133	-0.6824	0.1506	-4.5328	< 0,0001	-0.9775	-0.3873
Farm/Kidding Year Interaction	134	-1.0204	0.784	-1.3016	0.1931	-2.557	0.5162
Farm/Kidding Year Interaction	135	-0.4868	0.1899	-2.564	0.0104	-0.8589	-0.1147
Farm/Kidding Year Interaction	136	-1.8811	0.3723	-5.053	< 0,0001	-2.6108	-1.1515
Farm/Kidding Year Interaction	137	-0.1462	0.224	-0.6528	0.5139	-0.5852	0.2928
Farm/Kidding Year Interaction	138	-0.6876	0.166	-4.1428	< 0,0001	-1.0129	-0.3623
Farm/Kidding Year Interaction	139	-0.7826	0.2542	-3.0788	0.0021	-1.2809	-0.2844
Farm/Kidding Year Interaction	140	-0.0909	0.2018	-0.4506	0.6523	-0.4865	0.3046
Farm/Kidding Year Interaction	141	-0.2393	0.6916	-0.3459	0.7294	-1.5949	1.1164
Farm/Kidding Year Interaction	142	-0.4347	0.2284	-1.903	0.057	-0.8825	0.013
Farm/Kidding Year Interaction	143	-0.6674	0.2047	-3.2601	0.0011	-1.0686	-0.2661
Farm/Kidding Year Interaction	144	-0.4924	0.3061	-1.6088	0.1077	-1.0924	0.1075
Farm/Kidding Year Interaction	145	-0.3404	0.4258	-0.7995	0.424	-1.175	0.4942
Farm/Kidding Year Interaction	146	-0.0965	0.3281	-0.2942	0.7686	-0.7396	0.5465
Farm/Kidding Year Interaction	147	-0.4936	0.2082	-2.3706	0.0178	-0.9018	-0.0855
Farm/Kidding Year Interaction	148	-0.3919	0.1846	-2.1225	0.0338	-0.7538	-0.03
Farm/Kidding Year Interaction	149	-0.435	0.1953	-2.2277	0.0259	-0.8178	-0.0523
Farm/Kidding Year Interaction	150	-0.5756	0.2708	-2.1258	0.0335	-1.1063	-0.0449
Farm/Kidding Year Interaction	151	-0.275	0.1817	-1.5128	0.1303	-0.6312	0.0813
Farm/Kidding Year Interaction	152	-0.4193	0.2054	-2.0416	0.0412	-0.8219	-0.0168
Farm/Kidding Year Interaction	153	-0.4368	0.1475	-2.962	0.0031	-0.7258	-0.1477
Farm/Kidding Year Interaction	154	-0.6132	0.4954	-1.2377	0.2158	-1.5842	0.3578
Farm/Kidding Year Interaction	155	-0.2123	0.287	-0.7399	0.4594	-0.7747	0.3501
Farm/Kidding Year Interaction	156	-0.2161	0.1064	-2.0312	0.0422	-0.4246	-0.0076
Farm/Kidding Year Interaction	157	-0.8157	0.3289	-2.4799	0.0131	-1.4604	-0.171
Farm/Kidding Year Interaction	158	-1.0517	0.2707	-3.885	0.0001	-1.5823	-0.5211
Farm/Kidding Year Interaction	159	-0.7435	0.3911	-1.9009	0.0573	-1.5101	0.0231
Farm/Kidding Year Interaction	160	-0.6778	0.3243	-2.09	0.0366	-1.3134	-0.0422
Farm/Kidding Year Interaction	161	-0.6507	0.5041	-1.2908	0.1968	-1.6387	0.3373
Farm/Kidding Year Interaction	162	-0.5993	0.1795	-3.3383	0.0008	-0.9511	-0.2474
Farm/Kidding Year Interaction	163	-1.1206	0.2975	-3.7668	0.0002	-1.7037	-0.5375
Farm/Kidding Year Interaction	164	-2.1702	0.6967	-3.1151	0.0018	-3.5357	-0.8047
Farm/Kidding Year Interaction	165	-0.7757	0.1909	-4.0642	< 0,0001	-1.1498	-0.4016
Farm/Kidding Year Interaction	166	-0.4852	0.1904	-2.5484	0.0108	-0.8584	-0.112
Farm/Kidding Year Interaction	167	-0.5731	0.194	-2.9538	0.0031	-0.9534	-0.1928
Farm/Kidding Year Interaction	168	0.1616	0.2843	0.5684	0.5698	-0.3956	0.7188
Farm/Kidding Year Interaction	169	-0.0379	0.285	-0.1329	0.8943	-0.5965	0.5207
Farm/Kidding Year Interaction	170	-0.8112	0.2848	-2.8486	0.0044	-1.3694	-0.253
Farm/Kidding Year Interaction	171	-0.7081	0.2982	-2.3745	0.0176	-1.2925	-0.1236
Farm/Kidding Year Interaction	172	-0.3636	0.1817	-2.0011	0.0454	-0.7197	-0.0075
Farm/Kidding Year Interaction	173	-0.6242	0.1966	-3.1758	0.0015	-1.0095	-0.239
Farm/Kidding Year Interaction	174	0.0001	0.2821	0.0002	0.9998	-0.553	0.5531
Farm/Kidding Year Interaction	175	-0.0105	0.1831	-0.0572	0.9544	-0.3694	0.3485
Farm/Kidding Year Interaction	176	-0.5595	0.1978	-2.8284	0.0047	-0.9471	-0.1718
Farm/Kidding Year Interaction	177	-0.0514	0.2197	-0.2342	0.8148	-0.482	0.3791
Farm/Kidding Year Interaction	178	0.2126	0.1834	1.1596	0.2462	-0.1468	0.5721
Farm/Kidding Year Interaction	179	-0.4706	0.1408	-3.3412	0.0008	-0.7466	-0.1945
Farm/Kidding Year Interaction	180	-0.8926	0.3741	-2.3862	0.017	-1.6257	-0.1594
Farm/Kidding Year Interaction	181	-1.3391	0.6872	-1.9486	0.0514	-2.6861	0.0079
Farm/Kidding Year Interaction	182	-0.8066	0.7448	-1.083	0.2788	-2.2665	0.6533
Farm/Kidding Year Interaction	183	-0.1562	0.3175	-0.4919	0.6228	-0.7786	0.4662
Farm/Kidding Year Interaction	184	-0.7028	0.448	-1.5687	0.1167	-1.5808	0.1753
Farm/Kidding Year Interaction	185	-0.1354	0.195	-0.6945	0.4874	-0.5177	0.2468
Farm/Kidding Year Interaction	186	-0.5337	0.2714	-1.9669	0.0492	-1.0656	-0.0019
Farm/Kidding Year Interaction	187	-0.0077	0.0971	-0.0791	0.937	-0.1981	0.1827
Farm/Kidding Year Interaction	188	0.0249	0.1153	0.2158	0.8291	-0.2012	0.2509
Farm/Kidding Year Interaction	189	-0.806	0.2109	-3.8223	0.0001	-1.2193	-0.3927
Farm/Kidding Year Interaction	190	-0.315	0.1484	-2.1233	0.0337	-0.6058	-0.0242
Farm/Kidding Year Interaction	191	-0.5338	0.3321	-1.6073	0.108	-1.1847	0.1171
Farm/Kidding Year Interaction	192	-1.8739	0.1986	-9.4355	< 0,0001	-2.2632	-1.4846
Farm/Kidding Year Interaction	193	-1.3563	0.1872	-7.2437	< 0,0001	-1.7232	-0.9893
Farm/Kidding Year Interaction	194	-2.8238	0.4295	-6.5744	< 0,0001	-3.6657	-1.9819
Farm/Kidding Year Interaction	195	0.1294	0.2448	0.5287	0.597	-0.3504	0.6092
Farm/Kidding Year Interaction	196	-0.3586	0.2746	-1.3059	0.1916	-0.8968	0.1796
Farm/Kidding Year Interaction	197	-0.7145	0.142	-5.031	< 0,0001	-0.9928	-0.4361
Farm/Kidding Year Interaction	198	-0.6242	0.2878	-2.1688	0.0301	-1.1884	-0.0601
Farm/Kidding Year Interaction	199	-1.3974	0.4145	-3.3709	0.0007	-2.2099	-0.5849
Farm/Kidding Year Interaction	200	-0.9376	0.1649	-5.6854	< 0,0001	-1.2608	-0.6144
Farm/Kidding Year Interaction	201	-0.9404	0.1963	-4.7916	< 0,0001	-1.3251	-0.5557
Farm/Kidding Year Interaction	202	-0.067	0.316	-0.212	0.8321	-0.6863	0.5523
Farm/Kidding Year Interaction	203	0.6176	0.1394	4.4289	< 0,0001	0.3443	0.8909
Farm/Kidding Year Interaction	204	-0.5611	0.1388	-4.0428	< 0,0001	-0.8331	-0.2891
Farm/Kidding Year Interaction	205	0.1281	0.9571	0.1339	0.8935	-1.7477	2.004
Farm/Kidding Year Interaction	206	-0.518	0.1453	-3.5643	0.0004	-0.8029	-0.2332
Farm/Kidding Year Interaction	207	-1.0796	0.2461	-4.3875	< 0,0001	-1.5619	-0.5973
Farm/Kidding Year Interaction	208	0	0
Farm/Kidding Year Interaction	209	0.068	0.1688	0.4027	0.6872	-0.2628	0.3987
Farm/Kidding Year Interaction	210	0.1493	0.1751	0.8531	0.3936	-0.1938	0.4925
Farm/Kidding Year Interaction	211	-0.1434	0.3438	-0.417	0.6767	-0.8173	0.5305
Farm/Kidding Year Interaction	212	-0.7971	0.1452	-5.4896	< 0,0001	-1.0817	-0.5125
Farm/Kidding Year Interaction	213	-1.0994	0.4111	-2.6741	0.0075	-1.9053	-0.2936
Farm/Kidding Year Interaction	214	0.0877	0.1905	0.4605	0.6451	-0.2856	0.4611
Farm/Kidding Year Interaction	215	0.6191	0.4307	1.4373	0.1506	-0.2251	1.4633
Farm/Kidding Year Interaction	216	-1.7278	0.7012	-2.464	0.0137	-3.1022	-0.3534
Farm/Kidding Year Interaction	217	0.0902	0.1943	0.4643	0.6424	-0.2907	0.4711
Farm/Kidding Year Interaction	218	-2.5411	0.699	-3.6354	0.0003	-3.9111	-1.1711
Farm/Kidding Year Interaction	219	-0.8759	0.1719	-5.0962	< 0,0001	-1.2128	-0.5391
Farm/Kidding Year Interaction	220	-1.585	0.3422	-4.6315	< 0,0001	-2.2558	-0.9142
Farm/Kidding Year Interaction	221	-0.5251	0.1713	-3.0648	0.0022	-0.8609	-0.1893
Farm/Kidding Year Interaction	222	-0.3144	0.1825	-1.723	0.0849	-0.672	0.0433
Farm/Kidding Year Interaction	223	0.1208	0.1892	0.6386	0.5231	-0.25	0.4917
Farm/Kidding Year Interaction	224	-0.8134	0.152	-5.3508	< 0,0001	-1.1113	-0.5154
Farm/Kidding Year Interaction	225	-0.6454	0.1416	-4.5574	< 0,0001	-0.923	-0.3678
Farm/Kidding Year Interaction	226	-0.2785	0.3236	-0.8605	0.3895	-0.9128	0.3558
Farm/Kidding Year Interaction	227	-0.445	0.3284	-1.355	0.1754	-1.0887	0.1987
Farm/Kidding Year Interaction	228	-0.9079	0.2884	-3.1481	0.0016	-1.4732	-0.3426
Farm/Kidding Year Interaction	229	-0.3516	0.1796	-1.9574	0.0503	-0.7036	0.0005
Farm/Kidding Year Interaction	230	-0.4199	0.2508	-1.6745	0.094	-0.9114	0.0716
Farm/Kidding Year Interaction	231	-0.9806	0.1716	-5.7134	< 0,0001	-1.317	-0.6442
Farm/Kidding Year Interaction	232	0.0417	0.1868	0.2232	0.8233	-0.3245	0.4079
Farm/Kidding Year Interaction	233	-0.3535	0.2215	-1.5962	0.1105	-0.7876	0.0806
Farm/Kidding Year Interaction	234	-0.6866	0.1425	-4.8189	< 0,0001	-0.9659	-0.4073
Farm/Kidding Year Interaction	235	-0.118	0.3379	-0.3491	0.727	-0.7802	0.5443
Farm/Kidding Year Interaction	236	-0.1084	0.2709	-0.4002	0.689	-0.6393	0.4225
Farm/Kidding Year Interaction	237	-0.3746	0.246	-1.5227	0.1278	-0.8567	0.1076
Farm/Kidding Year Interaction	238	-0.57	0.1984	-2.8734	0.0041	-0.9588	-0.1812
Farm/Kidding Year Interaction	239	-1.1645	0.1933	-6.0249	< 0,0001	-1.5434	-0.7857
Farm/Kidding Year Interaction	240	-0.4798	0.1612	-2.9759	0.0029	-0.7958	-0.1638
Farm/Kidding Year Interaction	241	-0.391	0.1892	-2.0668	0.0388	-0.7618	-0.0202
Farm/Kidding Year Interaction	242	-0.5361	0.1302	-4.116	< 0,0001	-0.7913	-0.2808
Farm/Kidding Year Interaction	243	-0.4911	0.125	-3.929	< 0,0001	-0.736	-0.2461
Farm/Kidding Year Interaction	244	-0.7558	0.193	-3.9167	< 0,0001	-1.134	-0.3776
Farm/Kidding Year Interaction	245	-0.3527	0.1508	-2.3388	0.0193	-0.6483	-0.0571
Farm/Kidding Year Interaction	246	0	0
Farm/Kidding Year Interaction	247	0.5064	0.1333	3.7976	0.0001	0.245	0.7678
Farm/Kidding Year Interaction	248	0.0283	0.2913	0.097	0.9227	-0.5428	0.5993
Farm/Kidding Year Interaction	249	-0.3754	0.1987	-1.8895	0.0588	-0.7648	0.014
Farm/Kidding Year Interaction	250	-0.1685	0.1798	-0.9376	0.3485	-0.5209	0.1838
Farm/Kidding Year Interaction	251	-0.2122	0.1789	-1.1861	0.2356	-0.563	0.1385
Farm/Kidding Year Interaction	252	-0.1951	0.2261	-0.8629	0.3882	-0.6382	0.248
Farm/Kidding Year Interaction	253	0.115	0.2592	0.4436	0.6573	-0.3931	0.623
Farm/Kidding Year Interaction	254	-0.355	0.1656	-2.1433	0.0321	-0.6797	-0.0304
Farm/Kidding Year Interaction	255	-0.286	0.1895	-1.5092	0.1313	-0.6574	0.0854
Farm/Kidding Year Interaction	256	-0.7621	0.2985	-2.5531	0.0107	-1.3472	-0.177
Farm/Kidding Year Interaction	257	0.2971	0.1764	1.6842	0.0922	-0.0487	0.6429
Farm/Kidding Year Interaction	258	-0.1461	0.2176	-0.6713	0.502	-0.5727	0.2805
Farm/Kidding Year Interaction	259	-1.3528	0.4276	-3.1636	0.0016	-2.1909	-0.5147
Farm/Kidding Year Interaction	260	-2.0394	0.6986	-2.9194	0.0035	-3.4086	-0.6702
Farm/Kidding Year Interaction	261	0.0167	0.1653	0.1012	0.9194	-0.3072	0.3406
Farm/Kidding Year Interaction	262	-0.3114	0.1873	-1.6627	0.0964	-0.6784	0.0557
Farm/Kidding Year Interaction	263	-1.1182	0.3454	-3.2371	0.0012	-1.7952	-0.4411
Farm/Kidding Year Interaction	264	0.0122	0.2141	0.057	0.9546	-0.4074	0.4318
Farm/Kidding Year Interaction	265	-0.6183	0.3979	-1.554	0.1202	-1.3981	0.1615
Farm/Kidding Year Interaction	266	-0.0082	0.1808	-0.0455	0.9637	-0.3627	0.3462
Farm/Kidding Year Interaction	267	-0.834	0.2005	-4.1594	< 0,0001	-1.227	-0.441
Farm/Kidding Year Interaction	268	-0.0513	0.2003	-0.2559	0.7981	-0.4439	0.3414
Farm/Kidding Year Interaction	269	-0.3251	0.194	-1.6757	0.0938	-0.7053	0.0551
Farm/Kidding Year Interaction	270	-0.5147	0.1451	-3.5467	0.0004	-0.7992	-0.2303
Farm/Kidding Year Interaction	271	-0.6695	0.1398	-4.7904	< 0,0001	-0.9435	-0.3956
Farm/Kidding Year Interaction	272	-0.384	0.1272	-3.0198	0.0025	-0.6333	-0.1348
Farm/Kidding Year Interaction	273	-0.9063	0.4191	-2.1626	0.0306	-1.7278	-0.0849
Farm/Kidding Year Interaction	274	-0.4354	0.1813	-2.4018	0.0163	-0.7907	-0.0801
Farm/Kidding Year Interaction	275	-0.3233	0.1678	-1.9265	0.054	-0.6523	0.0056
Farm/Kidding Year Interaction	276	-0.3924	0.1805	-2.1737	0.0297	-0.7463	-0.0386
Farm/Kidding Year Interaction	277	0.0087	0.2878	0.0301	0.976	-0.5553	0.5727
Farm/Kidding Year Interaction	278	0.2754	0.1486	1.8534	0.0638	-0.0158	0.5667
Farm/Kidding Year Interaction	279	0.2392	0.1447	1.6532	0.0983	-0.0444	0.5227
Farm/Kidding Year Interaction	280	-0.5617	0.4126	-1.3613	0.1734	-1.3705	0.2471
Farm/Kidding Year Interaction	281	-1.5622	0.6881	-2.2702	0.0232	-2.911	-0.2135
Farm/Kidding Year Interaction	282	-0.0953	0.325	-0.2931	0.7695	-0.7323	0.5418
Farm/Kidding Year Interaction	283	-0.3792	0.326	-1.1633	0.2447	-1.0182	0.2598
Farm/Kidding Year Interaction	284	-0.9607	0.5733	-1.6756	0.0938	-2.0845	0.1631
Farm/Kidding Year Interaction	285	-0.5512	0.1497	-3.6809	0.0002	-0.8447	-0.2577
Farm/Kidding Year Interaction	286	0.1086	0.2155	0.5039	0.6143	-0.3138	0.531
Farm/Kidding Year Interaction	287	-0.8405	0.3091	-2.7197	0.0065	-1.4463	-0.2348
Farm/Kidding Year Interaction	288	-0.561	0.2931	-1.9143	0.0556	-1.1355	0.0134
Farm/Kidding Year Interaction	289	-0.2535	0.2861	-0.8861	0.3756	-0.8141	0.3072
Farm/Kidding Year Interaction	290	-0.5101	0.1483	-3.4388	0.0006	-0.8009	-0.2194
Farm/Kidding Year Interaction	291	-0.3501	0.3282	-1.0665	0.2862	-0.9935	0.2933
Farm/Kidding Year Interaction	292	-0.5175	0.2675	-1.935	0.053	-1.0417	0.0067
Farm/Kidding Year Interaction	293	-1.2046	0.1902	-6.3323	< 0,0001	-1.5774	-0.8317
Farm/Kidding Year Interaction	294	-0.4946	0.1679	-2.9469	0.0032	-0.8236	-0.1656
Farm/Kidding Year Interaction	295	-0.1707	0.2017	-0.8463	0.3974	-0.5661	0.2247
Farm/Kidding Year Interaction	296	-0.63	0.2009	-3.1357	0.0017	-1.0238	-0.2362
Farm/Kidding Year Interaction	297	-0.613	0.2043	-3.0005	0.0027	-1.0134	-0.2126
Farm/Kidding Year Interaction	298	-0.2959	0.2505	-1.1809	0.2377	-0.7869	0.1952
Farm/Kidding Year Interaction	299	-0.3424	0.2163	-1.5829	0.1135	-0.7665	0.0816
Farm/Kidding Year Interaction	300	0.1059	0.1593	0.6653	0.5059	-0.2062	0.4181
Farm/Kidding Year Interaction	301	-0.3383	0.2026	-1.6696	0.095	-0.7355	0.0588
Farm/Kidding Year Interaction	302	-0.5713	0.1991	-2.8686	0.0041	-0.9616	-0.1809
Farm/Kidding Year Interaction	303	-0.667	0.1676	-3.9792	< 0,0001	-0.9956	-0.3385
Farm/Kidding Year Interaction	304	-0.2942	0.1389	-2.1184	0.0341	-0.5665	-0.022
Farm/Kidding Year Interaction	305	-0.67	0.2366	-2.8317	0.0046	-1.1338	-0.2063
Farm/Kidding Year Interaction	306	-0.3743	0.1259	-2.9722	0.003	-0.6212	-0.1275
Farm/Kidding Year Interaction	307	-0.4653	0.1823	-2.552	0.0107	-0.8227	-0.1079
Farm/Kidding Year Interaction	308	0.2499	0.1799	1.3897	0.1646	-0.1026	0.6024
Farm/Kidding Year Interaction	309	-0.6244	0.1466	-4.2605	< 0,0001	-0.9117	-0.3372
Farm/Kidding Year Interaction	310	-0.9916	0.1983	-5.001	< 0,0001	-1.3802	-0.603
Farm/Kidding Year Interaction	311	0.5019	0.2011	2.4953	0.0126	0.1077	0.8962
Farm/Kidding Year Interaction	312	-0.1288	0.1565	-0.8229	0.4105	-0.4355	0.1779
Farm/Kidding Year Interaction	313	-0.2171	0.2247	-0.9662	0.3339	-0.6575	0.2233
Farm/Kidding Year Interaction	314	-0.3672	0.1703	-2.1563	0.0311	-0.701	-0.0334
Farm/Kidding Year Interaction	315	-0.7016	0.1734	-4.047	< 0,0001	-1.0414	-0.3618
Farm/Kidding Year Interaction	316	-0.101	0.1923	-0.5255	0.5992	-0.4779	0.2758
Farm/Kidding Year Interaction	317	-0.0153	0.2467	-0.0619	0.9506	-0.4989	0.4683
Farm/Kidding Year Interaction	318	0.1	0.2456	0.4069	0.6841	-0.3815	0.5814
Farm/Kidding Year Interaction	319	-0.0123	0.2229	-0.055	0.9562	-0.4492	0.4247
Farm/Kidding Year Interaction	320	-0.0915	0.2266	-0.4038	0.6864	-0.5357	0.3527
Farm/Kidding Year Interaction	321	-0.8089	0.3504	-2.3082	0.021	-1.4958	-0.122
Farm/Kidding Year Interaction	322	0.2351	0.2898	0.8114	0.4171	-0.3329	0.8031
Farm/Kidding Year Interaction	323	-0.6912	0.2024	-3.4144	0.0006	-1.088	-0.2944
Farm/Kidding Year Interaction	324	0.1233	0.2114	0.5834	0.5597	-0.2911	0.5378
Farm/Kidding Year Interaction	325	-0.5949	0.1443	-4.1215	< 0,0001	-0.8778	-0.312
Farm/Kidding Year Interaction	326	-0.8697	0.1415	-6.1465	< 0,0001	-1.147	-0.5924
Farm/Kidding Year Interaction	327	-0.1662	0.1955	-0.8505	0.3951	-0.5494	0.2169
Farm/Kidding Year Interaction	328	-0.7591	0.2706	-2.8051	0.005	-1.2895	-0.2287
Farm/Kidding Year Interaction	329	-0.2541	0.1821	-1.3952	0.163	-0.611	0.1029
Farm/Kidding Year Interaction	330	0.2059	0.1975	1.043	0.297	-0.1811	0.593
Farm/Kidding Year Interaction	331	-0.6275	0.1447	-4.3364	< 0,0001	-0.9111	-0.3439
Farm/Kidding Year Interaction	332	-0.8848	0.4178	-2.1176	0.0342	-1.7037	-0.0659
Farm/Kidding Year Interaction	333	-1.227	0.1876	-6.5403	< 0,0001	-1.5947	-0.8593
Farm/Kidding Year Interaction	334	-0.3892	0.1385	-2.8107	0.0049	-0.6606	-0.1178
Farm/Kidding Year Interaction	335	0.3222	0.1204	2.6764	0.0074	0.0862	0.5581
Farm/Kidding Year Interaction	336	-0.7392	0.2849	-2.5947	0.0095	-1.2976	-0.1808
Farm/Kidding Year Interaction	337	-0.6988	0.1735	-4.0285	< 0,0001	-1.0388	-0.3588
Farm/Kidding Year Interaction	338	0.1682	0.1733	0.9706	0.3318	-0.1715	0.5078
Farm/Kidding Year Interaction	339	-0.8202	0.2656	-3.0881	0.002	-1.3409	-0.2996
Farm/Kidding Year Interaction	340	-0.4424	0.3337	-1.3257	0.1849	-1.0965	0.2117
Farm/Kidding Year Interaction	341	0.0156	0.2005	0.0778	0.938	-0.3773	0.4085
Farm/Kidding Year Interaction	342	-0.5743	0.1745	-3.2901	0.001	-0.9164	-0.2322
Farm/Kidding Year Interaction	343	-0.5587	0.2187	-2.5546	0.0106	-0.9874	-0.13
Farm/Kidding Year Interaction	344	-0.7951	0.3144	-2.5293	0.0114	-1.4112	-0.1789
Farm/Kidding Year Interaction	345	0.3996	0.5128	0.7792	0.4359	-0.6056	1.4047
Farm/Kidding Year Interaction	346	0.5836	0.4951	1.1787	0.2385	-0.3869	1.5541
Farm/Kidding Year Interaction	347	0.4035	0.2198	1.8361	0.0664	-0.0272	0.8342
Farm/Kidding Year Interaction	348	-0.9478	0.278	-3.4097	0.0007	-1.4927	-0.403
Farm/Kidding Year Interaction	349	0.0291	0.1903	0.153	0.8784	-0.3439	0.4022
Farm/Kidding Year Interaction	350	-0.1124	0.2758	-0.4076	0.6836	-0.653	0.4282
Farm/Kidding Year Interaction	351	0.1898	0.2526	0.7513	0.4525	-0.3054	0.685
Farm/Kidding Year Interaction	352	1.1918	0.4857	2.454	0.0141	0.2399	2.1437
Farm/Kidding Year Interaction	353	0.1294	0.3036	0.4261	0.67	-0.4656	0.7243
Farm/Kidding Year Interaction	354	-1.0476	0.2479	-4.2262	< 0,0001	-1.5335	-0.5618
Farm/Kidding Year Interaction	355	0.0656	0.263	0.2493	0.8031	-0.4499	0.581
Farm/Kidding Year Interaction	356	-0.3949	0.2552	-1.5471	0.1219	-0.8951	0.1054
Farm/Kidding Year Interaction	357	-0.4021	0.3565	-1.1278	0.2594	-1.1009	0.2967
Farm/Kidding Year Interaction	358	-0.2938	0.1498	-1.9613	0.0498	-0.5875	-0.0002
Farm/Kidding Year Interaction	359	1.1534	0.4823	2.3914	0.0168	0.2081	2.0986
Farm/Kidding Year Interaction	360	0	0
Farm/Kidding Year Interaction	361	-0.043	0.1264	-0.3402	0.7337	-0.2908	0.2048
Farm/Kidding Year Interaction	362	0.0124	0.252	0.049	0.9609	-0.4816	0.5063
Farm/Kidding Year Interaction	363	-0.251	0.273	-0.9193	0.3579	-0.7861	0.2841
Farm/Kidding Year Interaction	364	-0.0154	0.1907	-0.081	0.9355	-0.3893	0.3584
Farm/Kidding Year Interaction	365	-0.3602	0.1449	-2.4857	0.0129	-0.6442	-0.0762
Farm/Kidding Year Interaction	366	-0.5401	0.4195	-1.2875	0.1979	-1.3623	0.2821
Farm/Kidding Year Interaction	367	-0.2809	0.1837	-1.5293	0.1262	-0.6408	0.0791
Farm/Kidding Year Interaction	368	0.1341	0.1959	0.6847	0.4936	-0.2499	0.5182
Farm/Kidding Year Interaction	369	-0.4301	0.1427	-3.0151	0.0026	-0.7097	-0.1505
Farm/Kidding Year Interaction	370	-0.5807	0.3424	-1.696	0.0899	-1.2518	0.0904
Farm/Kidding Year Interaction	371	0.4437	0.179	2.4792	0.0132	0.0929	0.7944
Farm/Kidding Year Interaction	372	-0.1736	0.3357	-0.5171	0.6051	-0.8316	0.4844
Farm/Kidding Year Interaction	373	0.1398	0.1742	0.8027	0.4222	-0.2016	0.4813
Farm/Kidding Year Interaction	374	-0.7733	0.1883	-4.1067	< 0,0001	-1.1424	-0.4042
Farm/Kidding Year Interaction	375	0.0386	0.1822	0.2119	0.8322	-0.3186	0.3958
Farm/Kidding Year Interaction	376	0.0428	0.2167	0.1975	0.8434	-0.3819	0.4675
Farm/Kidding Year Interaction	377	-0.4794	0.172	-2.7865	0.0053	-0.8166	-0.1422
Farm/Kidding Year Interaction	378	0.373	0.2007	1.8587	0.0631	-0.0203	0.7663
Farm/Kidding Year Interaction	379	-0.8029	0.2704	-2.9693	0.003	-1.3329	-0.2729
Farm/Kidding Year Interaction	380	0	0
Farm/Kidding Year Interaction	381	-0.7724	0.2225	-3.4708	0.0005	-1.2086	-0.3362
Farm/Kidding Year Interaction	382	-1.0242	0.2832	-3.616	0.0003	-1.5794	-0.4691
Farm/Kidding Year Interaction	383	0	0
Farm/Kidding Year Interaction	384	0.5429	0.1908	2.8459	0.0044	0.169	0.9169
Farm/Kidding Year Interaction	385	-0.2526	0.2945	-0.8578	0.391	-0.8297	0.3246
Farm/Kidding Year Interaction	386	0.1034	0.4849	0.2132	0.8311	-0.847	1.0538
Farm/Kidding Year Interaction	387	0	0
Farm/Kidding Year Interaction	388	-0.6262	0.4951	-1.2648	0.206	-1.5966	0.3442
Farm/Kidding Year Interaction	389	-0.2502	0.1774	-1.411	0.1583	-0.5979	0.0974
Farm/Kidding Year Interaction	390	0.2582	0.1745	1.4799	0.1389	-0.0837	0.6001
Farm/Kidding Year Interaction	391	0.3293	0.1588	2.0737	0.0381	0.0181	0.6406
Farm/Kidding Year Interaction	392	0.3328	0.7449	0.4468	0.655	-1.1272	1.7929
Farm/Kidding Year Interaction	393	-0.0787	0.2192	-0.359	0.7196	-0.5082	0.3509
Farm/Kidding Year Interaction	394	-0.4055	0.1838	-2.206	0.0274	-0.7657	-0.0452
Farm/Kidding Year Interaction	395	1.071	0.532	2.0132	0.0441	0.0283	2.1138
Farm/Kidding Year Interaction	396	0	0
Farm/Kidding Year Interaction	397	0.633	0.2269	2.7893	0.0053	0.1882	1.0778
Farm/Kidding Year Interaction	398	-0.0448	0.4925	-0.0909	0.9276	-1.01	0.9205
Farm/Kidding Year Interaction	399	0.1633	0.5326	0.3066	0.7592	-0.8806	1.2072
Farm/Kidding Year Interaction	400	0.1241	0.2484	0.4997	0.6173	-0.3628	0.611
Farm/Kidding Year Interaction	401	-0.0219	0.366	-0.06	0.9522	-0.7394	0.6955
Farm/Kidding Year Interaction	402	0.3849	0.2038	1.8884	0.059	-0.0146	0.7844
Farm/Kidding Year Interaction	403	0	0
Farm/Kidding Year Interaction	404	-0.0555	0.1865	-0.2974	0.7661	-0.4211	0.3101
Farm/Kidding Year Interaction	405	0	0
Farm/Kidding Year Interaction	406	0	0
Farm/Kidding Year Interaction	407	0	0
Farm/Kidding Year Interaction	408	0	0
Farm/Kidding Year Interaction	409	0	0
Farm/Kidding Year Interaction	410	0	0
Farm/Kidding Year Interaction	411	0	0
Farm/Kidding Year Interaction	412	0	0
Farm/Kidding Year Interaction	413	0	0
Farm/Kidding Year Interaction	414	0	0
Farm/Kidding Year Interaction	415	0	0
Farm/Kidding Year Interaction	416	0	0
Farm/Kidding Year Interaction	417	0	0
Farm/Kidding Year Interaction	418	0	0
Farm/Kidding Year Interaction	419	0	0
Farm/Kidding Year Interaction	420	0	0
Farm/Kidding Year Interaction	421	0	0
Farm/Kidding Year Interaction	422	0	0
Farm/Kidding Year Interaction	423	0	0
Farm/Kidding Year Interaction	424	0	0
Farm/Kidding Year Interaction	425	0	0
Farm/Kidding Year Interaction	426	0	0
Farm/Kidding Year Interaction	427	0	0
Farm/Kidding Year Interaction	428	0	0
Farm/Kidding Year Interaction	429	0	0
Farm/Kidding Year Interaction	430	0	0
Farm/Kidding Year Interaction	431	0	0
Farm/Kidding Year Interaction	432	0	0
Farm/Kidding Year Interaction	433	0	0
Farm/Kidding Year Interaction	434	0	0
Farm/Kidding Year Interaction	435	0	0
Farm/Kidding Year Interaction	436	0	0
Farm/Kidding Year Interaction	437	0	0
Farm/Kidding Year Interaction	438	0	0
Farm/Kidding Year Interaction	439	0	0
Farm/Kidding Year Interaction	440	0	0
Farm/Kidding Year Interaction	441	0	0
Farm/Kidding Year Interaction	442	0	0
Farm/Kidding Year Interaction	443	0	0
Farm/Kidding Year Interaction	444	0	0
Farm/Kidding Year Interaction	445	0	0
Farm/Kidding Year Interaction	446	0	0
Farm/Kidding Year Interaction	447	0	0
Farm/Kidding Year Interaction	448	0	0
Farm/Kidding Year Interaction	449	0	0
Farm/Kidding Year Interaction	450	0	0
Farm/Kidding Year Interaction	451	0	0
Farm/Kidding Year Interaction	452	0	0
Farm/Kidding Year Interaction	453	0	0
Farm/Kidding Year Interaction	454	0	0
Farm/Kidding Year Interaction	455	0	0
Farm/Kidding Year Interaction	456	0	0
Farm/Kidding Year Interaction	457	0	0
Farm/Kidding Year Interaction	458	0	0
Farm/Kidding Year Interaction	459	0	0
Farm/Kidding Year Interaction	460	0	0
Farm/Kidding Year Interaction	461	0	0
Farm/Kidding Year Interaction	462	0	0
Farm/Kidding Year Interaction	463	0	0
Farm/Kidding Year Interaction	464	0	0
Farm/Kidding Year Interaction	465	0	0
Farm/Kidding Year Interaction	466	0	0
Farm/Kidding Year Interaction	467	0	0
Farm/Kidding Year Interaction	468	0	0
Farm/Kidding Year Interaction	469	0	0
Farm/Kidding Year Interaction	470	0	0
Farm/Kidding Year Interaction	471	0	0
Farm/Kidding Year Interaction	472	0	0
Farm/Kidding Year Interaction	473	0	0
Farm/Kidding Year Interaction	474	0	0
Farm/Kidding Year Interaction	475	0	0
Farm/Kidding Year Interaction	476	0	0

## Sheet: Rump Angle
Parameter/Fixed Effect/Covariate	Level	Value	Standard error	t	Pr > |t|	Lower bound (95%)	Upper bound (95%)
Intercept	Intercept	39.7057	1.1687	33.9731	< 0,0001	37.4149	41.9965
Age (in years)	Age (in years)	0.1304	0.0119	10.9441	< 0,0001	0.1071	0.1538
Days in Milk	Days in Milk	-0.0034	0.0002	-15.5268	< 0,0001	-0.0039	-0.003
Farm	1	-1.0187	1.1276	-0.9034	0.3663	-3.2289	1.1914
Farm	2	-0.0362	1.2234	-0.0296	0.9764	-2.4342	2.3617
Farm	3	0.1583	1.2647	0.1252	0.9004	-2.3204	2.6371
Farm	4	-0.3196	1.1294	-0.283	0.7772	-2.5332	1.894
Farm	5	0.8437	1.1768	0.717	0.4734	-1.4628	3.1503
Farm	6	-0.4943	2.7127	-0.1822	0.8554	-5.8112	4.8227
Farm	7	1.0154	1.289	0.7877	0.4309	-1.5111	3.5419
Farm	8	0.2706	1.1266	0.2402	0.8102	-1.9376	2.4788
Farm	9	1.7801	1.1371	1.5655	0.1175	-0.4486	4.0088
Farm	10	-0.1416	1.2027	-0.1177	0.9063	-2.4989	2.2157
Farm	11	-0.1821	2.0487	-0.0889	0.9292	-4.1976	3.8335
Farm	12	-3.4013	2.6814	-1.2685	0.2046	-8.6568	1.8542
Farm	13	-1.1053	1.1497	-0.9614	0.3363	-3.3587	1.1481
Farm	14	-3.9812	2.0495	-1.9425	0.0521	-7.9984	0.0359
Farm	15	2.5134	1.3648	1.8417	0.0655	-0.1615	5.1884
Farm	16	1.4025	1.2027	1.1662	0.2436	-0.9548	3.7598
Farm	17	3.0869	2.089	1.4777	0.1395	-1.0075	7.1814
Farm	18	-1.8271	1.2073	-1.5133	0.1302	-4.1935	0.5393
Farm	19	-1.3512	1.3664	-0.9889	0.3227	-4.0294	1.3269
Farm	20	2.9284	1.3638	2.1473	0.0318	0.2554	5.6015
Farm	21	-0.3469	1.2176	-0.2849	0.7757	-2.7335	2.0396
Farm	22	-0.4499	2.6814	-0.1678	0.8668	-5.7054	4.8057
Farm	23	1.9803	1.216	1.6285	0.1034	-0.4031	4.3638
Farm	24	2.2094	1.2117	1.8234	0.0683	-0.1656	4.5844
Farm	25	1.2143	1.3051	0.9304	0.3521	-1.3437	3.7723
Farm	26	1.7132	1.4839	1.1545	0.2483	-1.1953	4.6218
Farm	27	2.4163	2.0469	1.1804	0.2378	-1.5957	6.4282
Farm	28	2.0088	1.4815	1.3559	0.1751	-0.895	4.9125
Farm	29	0.6798	1.2078	0.5628	0.5735	-1.6875	3.0471
Farm	30	2.8925	1.2063	2.3979	0.0165	0.5282	5.2568
Farm	31	-2.112	1.3051	-1.6183	0.1056	-4.6701	0.446
Farm	32	0.8259	1.2647	0.6531	0.5137	-1.6529	3.3047
Farm	33	-0.2329	1.6434	-0.1417	0.8873	-3.4541	2.9883
Farm	34	-1.1904	1.4337	-0.8303	0.4064	-4.0004	1.6196
Farm	35	2.7911	2.0487	1.3624	0.1731	-1.2244	6.8067
Farm	36	0.8645	1.2013	0.7196	0.4718	-1.49	3.219
Farm	37	-0.5775	2.6814	-0.2154	0.8295	-5.8331	4.6782
Farm	38	0.1334	1.2747	0.1047	0.9166	-2.3649	2.6318
Farm	39	2.5976	2.6814	0.9688	0.3327	-2.6579	7.8532
Farm	40	1.635	1.1792	1.3866	0.1656	-0.6761	3.9462
Farm	41	-0.8521	1.1296	-0.7543	0.4507	-3.0661	1.3619
Farm	42	-0.8436	1.6905	-0.499	0.6178	-4.157	2.4698
Farm	43	0.0185	1.5484	0.0119	0.9905	-3.0165	3.0534
Farm	44	0.1973	1.2027	0.164	0.8697	-2.16	2.5545
Farm	45	1.3982	1.1357	1.2312	0.2183	-0.8277	3.6241
Farm	46	-3.3323	2.0487	-1.6266	0.1038	-7.3478	0.6831
Farm	47	-2.6688	1.3974	-1.9098	0.0562	-5.4077	0.0701
Farm	48	0.7293	1.3407	0.544	0.5865	-1.8985	3.3571
Farm	49	0.5836	1.1986	0.4869	0.6263	-1.7656	2.9328
Farm	50	-2.5666	1.264	-2.0306	0.0423	-5.044	-0.0892
Farm	51	-0.3344	1.1124	-0.3006	0.7637	-2.5148	1.846
Farm	52	2.322	1.4351	1.618	0.1057	-0.4909	5.1348
Farm	53	0.2099	1.3428	0.1563	0.8758	-2.4219	2.8418
Farm	54	-1.2911	1.5473	-0.8344	0.404	-4.3239	1.7416
Farm	55	1.5848	1.3807	1.1479	0.251	-1.1213	4.2909
Farm	56	1.476	1.213	1.2168	0.2237	-0.9015	3.8534
Farm	57	1.5275	1.179	1.2955	0.1951	-0.7835	3.8384
Farm	58	-0.2594	2.6814	-0.0968	0.9229	-5.5149	4.9961
Farm	59	-0.16	1.1948	-0.134	0.8934	-2.5019	2.1818
Farm	60	-3.4137	1.7887	-1.9084	0.0563	-6.9197	0.0923
Farm	61	1.2121	1.1791	1.028	0.304	-1.0989	3.5231
Farm	62	-0.5064	1.2125	-0.4177	0.6762	-2.8829	1.87
Farm	63	0.2399	1.7876	0.1342	0.8932	-3.2638	3.7436
Farm	64	1.0531	1.3959	0.7544	0.4506	-1.6829	3.789
Farm	65	-0.173	1.3412	-0.129	0.8974	-2.8018	2.4558
Farm	66	2.3036	1.229	1.8744	0.0609	-0.1052	4.7125
Farm	67	0.7764	2.049	0.3789	0.7048	-3.2397	4.7925
Farm	68	-0.7715	1.1999	-0.643	0.5203	-3.1233	1.5803
Farm	69	-0.6543	2.6815	-0.244	0.8072	-5.9101	4.6015
Farm	70	3.6327	1.8324	1.9825	0.0474	0.0411	7.2243
Farm	71	0.2097	1.4328	0.1463	0.8836	-2.5986	3.0179
Farm	72	-0.6648	1.55	-0.4289	0.668	-3.7028	2.3732
Farm	73	3.2043	1.2887	2.4865	0.0129	0.6785	5.7301
Farm	74	0.2324	1.6435	0.1414	0.8875	-2.9889	3.4537
Farm	75	5.4229	2.6814	2.0224	0.0431	0.1672	10.6786
Farm	76	3.1783	1.1592	2.7419	0.0061	0.9063	5.4504
Farm	77	5.6084	2.6814	2.0916	0.0365	0.3528	10.8639
Farm	78	-1.3263	2.0874	-0.6354	0.5252	-5.4176	2.7651
Farm	79	-0.6412	1.1954	-0.5364	0.5917	-2.9843	1.7018
Farm	80	5.4422	1.4894	3.6541	0.0003	2.523	8.3614
Farm	81	0.9884	1.6435	0.6014	0.5476	-2.2329	4.2097
Farm	82	-0.9162	2.7122	-0.3378	0.7355	-6.2321	4.3997
Farm	83	0.9541	1.182	0.8072	0.4195	-1.3626	3.2709
Farm	84	0.3642	1.1437	0.3185	0.7501	-1.8774	2.6058
Farm	85	0.4691	1.1742	0.3995	0.6895	-1.8324	2.7707
Farm	86	0	0
Sex	Buck	0.3018	0.3972	0.7598	0.4474	-0.4768	1.0804
Sex	Doe	0	0
Lactation Stage/Maturity	Primiparous	0.1044	0.0396	2.6377	0.0084	0.0268	0.1819
Lactation Stage/Maturity	Multiparous	0	0
Lactation Stage/Maturity	Buckling	0.664	0.1454	4.5655	< 0,0001	0.3789	0.949
Lactation Stage/Maturity	Buck	0	0
Kidding Month	January	-0.0876	0.0791	-1.1073	0.2682	-0.2426	0.0674
Kidding Month	February	-0.0422	0.0801	-0.5276	0.5978	-0.1992	0.1147
Kidding Month	March	-0.0998	0.0831	-1.2009	0.2298	-0.2626	0.0631
Kidding Month	April	-0.0174	0.081	-0.2151	0.8297	-0.1761	0.1413
Kidding Month	May	-0.0569	0.0861	-0.661	0.5086	-0.2257	0.1119
Kidding Month	June	-0.0988	0.0897	-1.1016	0.2706	-0.2746	0.077
Kidding Month	July	-0.2204	0.1055	-2.0897	0.0367	-0.4271	-0.0137
Kidding Month	August	-0.2059	0.0847	-2.4313	0.015	-0.3718	-0.0399
Kidding Month	September	-0.1852	0.0867	-2.1373	0.0326	-0.3551	-0.0154
Kidding Month	October	0.0952	0.0825	1.1538	0.2486	-0.0665	0.257
Kidding Month	November	-0.0215	0.0773	-0.2775	0.7814	-0.173	0.1301
Kidding Month	December	0	0
Kidding Season	Winter	0	0
Kidding Season	Spring	0	0
Kidding Season	Summer	0	0
Kidding Season	Autumn	0	0
Farm/Kidding Year Interaction	1	3.4166	1.1969	2.8545	0.0043	1.0706	5.7626
Farm/Kidding Year Interaction	2	-0.6006	1.0164	-0.591	0.5546	-2.5928	1.3915
Farm/Kidding Year Interaction	3	-0.1884	0.9544	-0.1974	0.8435	-2.059	1.6822
Farm/Kidding Year Interaction	4	2.7524	0.5637	4.8832	< 0,0001	1.6476	3.8572
Farm/Kidding Year Interaction	5	2.7749	0.916	3.0295	0.0025	0.9796	4.5702
Farm/Kidding Year Interaction	6	3.1013	2.0866	1.4863	0.1372	-0.9884	7.1911
Farm/Kidding Year Interaction	7	9.5119	2.2681	4.1937	< 0,0001	5.0663	13.9575
Farm/Kidding Year Interaction	8	3.9662	2.511	1.5796	0.1142	-0.9553	8.8878
Farm/Kidding Year Interaction	9	15.9935	3.0501	5.2436	< 0,0001	10.0152	21.9718
Farm/Kidding Year Interaction	10	2.6355	0.5387	4.892	< 0,0001	1.5796	3.6914
Farm/Kidding Year Interaction	11	0	0
Farm/Kidding Year Interaction	12	3.1675	0.8087	3.917	< 0,0001	1.5825	4.7525
Farm/Kidding Year Interaction	13	0.2184	2.5013	0.0873	0.9304	-4.6841	5.1209
Farm/Kidding Year Interaction	14	4.374	1.1967	3.6552	0.0003	2.0285	6.7195
Farm/Kidding Year Interaction	15	4.9091	2.7095	1.8119	0.07	-0.4015	10.2197
Farm/Kidding Year Interaction	16	0	0
Farm/Kidding Year Interaction	17	8.5658	2.4957	3.4322	0.0006	3.6741	13.4574
Farm/Kidding Year Interaction	18	3.2139	2.5529	1.2589	0.2081	-1.7898	8.2175
Farm/Kidding Year Interaction	19	-6.265	2.672	-2.3447	0.019	-11.5021	-1.0279
Farm/Kidding Year Interaction	20	1.9399	0.4955	3.9152	< 0,0001	0.9688	2.9111
Farm/Kidding Year Interaction	21	0.0482	0.8579	0.0562	0.9552	-1.6333	1.7298
Farm/Kidding Year Interaction	22	1.5651	0.5088	3.0763	0.0021	0.5679	2.5624
Farm/Kidding Year Interaction	23	-4.8066	2.501	-1.9219	0.0546	-9.7085	0.0954
Farm/Kidding Year Interaction	24	-0.5198	0.74	-0.7024	0.4824	-1.9701	0.9306
Farm/Kidding Year Interaction	25	-2.2295	0.6797	-3.2802	0.001	-3.5617	-0.8973
Farm/Kidding Year Interaction	26	-4.028	0.7771	-5.1833	< 0,0001	-5.5511	-2.5048
Farm/Kidding Year Interaction	27	-3.0741	1.689	-1.8201	0.0688	-6.3846	0.2364
Farm/Kidding Year Interaction	28	-0.1082	1.8603	-0.0582	0.9536	-3.7545	3.538
Farm/Kidding Year Interaction	29	0.5693	0.5683	1.0016	0.3165	-0.5447	1.6832
Farm/Kidding Year Interaction	30	0.0619	0.7294	0.0848	0.9324	-1.3677	1.4915
Farm/Kidding Year Interaction	31	0.7746	0.499	1.5523	0.1206	-0.2035	1.7528
Farm/Kidding Year Interaction	32	0	0
Farm/Kidding Year Interaction	33	1.8406	0.6692	2.7503	0.006	0.5289	3.1524
Farm/Kidding Year Interaction	34	3.8095	1.8034	2.1124	0.0347	0.2748	7.3443
Farm/Kidding Year Interaction	35	2.3966	0.6461	3.7094	0.0002	1.1303	3.6629
Farm/Kidding Year Interaction	36	2.6808	0.6658	4.0265	< 0,0001	1.3759	3.9858
Farm/Kidding Year Interaction	37	5.639	1.8381	3.0678	0.0022	2.0363	9.2418
Farm/Kidding Year Interaction	38	1.4537	0.536	2.7124	0.0067	0.4032	2.5042
Farm/Kidding Year Interaction	39	4.3235	1.8032	2.3977	0.0165	0.7891	7.8578
Farm/Kidding Year Interaction	40	2.0669	0.6159	3.3561	0.0008	0.8598	3.274
Farm/Kidding Year Interaction	41	1.4394	0.7626	1.8876	0.0591	-0.0552	2.9341
Farm/Kidding Year Interaction	42	3.3172	0.9258	3.5831	0.0003	1.5026	5.1317
Farm/Kidding Year Interaction	43	2.5872	1.9545	1.3237	0.1856	-1.2438	6.4181
Farm/Kidding Year Interaction	44	13.0513	3.4616	3.7703	0.0002	6.2665	19.8362
Farm/Kidding Year Interaction	45	2.169	0.6838	3.1721	0.0015	0.8288	3.5093
Farm/Kidding Year Interaction	46	7.6159	1.8484	4.1204	< 0,0001	3.9931	11.2387
Farm/Kidding Year Interaction	47	3.4813	2.997	1.1616	0.2454	-2.393	9.3555
Farm/Kidding Year Interaction	48	1.4847	0.5998	2.4754	0.0133	0.3091	2.6603
Farm/Kidding Year Interaction	49	1.8578	0.9219	2.0151	0.0439	0.0508	3.6648
Farm/Kidding Year Interaction	50	0.3523	0.705	0.4997	0.6173	-1.0295	1.7341
Farm/Kidding Year Interaction	51	-0.1188	0.7125	-0.1667	0.8676	-1.5152	1.2777
Farm/Kidding Year Interaction	52	0.7764	0.5264	1.475	0.1402	-0.2553	1.8082
Farm/Kidding Year Interaction	53	3.1663	1.3607	2.327	0.02	0.4993	5.8332
Farm/Kidding Year Interaction	54	1.5514	0.7053	2.1996	0.0278	0.169	2.9339
Farm/Kidding Year Interaction	55	1.3436	0.7556	1.7781	0.0754	-0.1374	2.8247
Farm/Kidding Year Interaction	56	0	0
Farm/Kidding Year Interaction	57	0.958	0.5715	1.6764	0.0937	-0.1621	2.0782
Farm/Kidding Year Interaction	58	-1.382	0.6377	-2.1671	0.0302	-2.632	-0.1321
Farm/Kidding Year Interaction	59	0.3688	0.9792	0.3766	0.7064	-1.5505	2.2881
Farm/Kidding Year Interaction	60	-0.0632	0.8043	-0.0786	0.9374	-1.6397	1.5133
Farm/Kidding Year Interaction	61	-0.2308	0.78	-0.296	0.7673	-1.7596	1.2979
Farm/Kidding Year Interaction	62	0.6821	1.3351	0.5109	0.6094	-1.9347	3.2988
Farm/Kidding Year Interaction	63	0.6239	0.521	1.1975	0.2311	-0.3973	1.6451
Farm/Kidding Year Interaction	64	-0.6276	1.1241	-0.5583	0.5767	-2.8308	1.5757
Farm/Kidding Year Interaction	65	-1.139	1.1344	-1.0041	0.3153	-3.3624	1.0844
Farm/Kidding Year Interaction	66	-0.6377	0.693	-0.9203	0.3574	-1.996	0.7205
Farm/Kidding Year Interaction	67	0	0
Farm/Kidding Year Interaction	68	-1.9803	0.5702	-3.4732	0.0005	-3.0978	-0.8628
Farm/Kidding Year Interaction	69	-1.272	0.5414	-2.3493	0.0188	-2.3332	-0.2108
Farm/Kidding Year Interaction	70	-4.9317	1.8097	-2.7251	0.0064	-8.4788	-1.3846
Farm/Kidding Year Interaction	71	-2.2719	1.3044	-1.7417	0.0816	-4.8285	0.2848
Farm/Kidding Year Interaction	72	-3.8549	1.3166	-2.9279	0.0034	-6.4354	-1.2743
Farm/Kidding Year Interaction	73	-2.3167	2.1578	-1.0736	0.283	-6.546	1.9127
Farm/Kidding Year Interaction	74	0.9034	0.869	1.0396	0.2985	-0.7998	2.6067
Farm/Kidding Year Interaction	75	1.2881	0.8312	1.5497	0.1212	-0.3411	2.9173
Farm/Kidding Year Interaction	76	5.0994	1.3654	3.7348	0.0002	2.4232	7.7755
Farm/Kidding Year Interaction	77	0	0
Farm/Kidding Year Interaction	78	1.1762	0.6099	1.9285	0.0538	-0.0192	2.3716
Farm/Kidding Year Interaction	79	2.4592	0.5253	4.6815	< 0,0001	1.4296	3.4888
Farm/Kidding Year Interaction	80	2.0749	1.4878	1.3946	0.1631	-0.8413	4.9911
Farm/Kidding Year Interaction	81	3.9025	1.4794	2.6378	0.0083	1.0028	6.8021
Farm/Kidding Year Interaction	82	-0.0336	2.8571	-0.0118	0.9906	-5.6335	5.5663
Farm/Kidding Year Interaction	83	5.2486	2.2784	2.3037	0.0212	0.783	9.7142
Farm/Kidding Year Interaction	84	1.076	0.7065	1.5228	0.1278	-0.3089	2.4608
Farm/Kidding Year Interaction	85	0.6888	0.687	1.0026	0.3161	-0.6577	2.0352
Farm/Kidding Year Interaction	86	0	0
Farm/Kidding Year Interaction	87	-1.0035	2.5067	-0.4003	0.6889	-5.9167	3.9097
Farm/Kidding Year Interaction	88	-2.0758	2.5701	-0.8077	0.4193	-7.1132	2.9615
Farm/Kidding Year Interaction	89	0.39	0.9216	0.4232	0.6722	-1.4163	2.1963
Farm/Kidding Year Interaction	90	0.4982	0.6958	0.7159	0.4741	-0.8657	1.862
Farm/Kidding Year Interaction	91	-0.0317	0.6982	-0.0454	0.9638	-1.4001	1.3368
Farm/Kidding Year Interaction	92	0.7366	0.4777	1.5419	0.1231	-0.1998	1.6729
Farm/Kidding Year Interaction	93	-0.0988	0.456	-0.2167	0.8284	-0.9926	0.795
Farm/Kidding Year Interaction	94	6.1921	2.4957	2.4811	0.0131	1.3004	11.0837
Farm/Kidding Year Interaction	95	2.0361	1.7914	1.1366	0.2557	-1.475	5.5473
Farm/Kidding Year Interaction	96	3.1977	2.7108	1.1796	0.2382	-2.1156	8.511
Farm/Kidding Year Interaction	97	-2.6127	1.6292	-1.6037	0.1088	-5.8061	0.5806
Farm/Kidding Year Interaction	98	-1.2897	0.8707	-1.4812	0.1386	-2.9963	0.4169
Farm/Kidding Year Interaction	99	-1.7523	0.9646	-1.8166	0.0693	-3.643	0.1383
Farm/Kidding Year Interaction	100	-0.8458	0.9634	-0.8779	0.38	-2.734	1.0425
Farm/Kidding Year Interaction	101	2.8249	0.6885	4.103	< 0,0001	1.4754	4.1744
Farm/Kidding Year Interaction	102	1.169	1.2996	0.8995	0.3684	-1.3784	3.7163
Farm/Kidding Year Interaction	103	1.8994	1.3311	1.4269	0.1536	-0.7096	4.5084
Farm/Kidding Year Interaction	104	1.5885	2.7665	0.5742	0.5658	-3.8339	7.0109
Farm/Kidding Year Interaction	105	0.7766	0.5325	1.4584	0.1447	-0.2671	1.8202
Farm/Kidding Year Interaction	106	0.5272	0.5234	1.0073	0.3138	-0.4987	1.553
Farm/Kidding Year Interaction	107	4.9337	2.5088	1.9666	0.0492	0.0164	9.851
Farm/Kidding Year Interaction	108	0.9896	1.5043	0.6579	0.5106	-1.9588	3.938
Farm/Kidding Year Interaction	109	2.1694	0.5683	3.8176	0.0001	1.0556	3.2832
Farm/Kidding Year Interaction	110	1.3235	0.4956	2.6706	0.0076	0.3521	2.2949
Farm/Kidding Year Interaction	111	7.847	1.4997	5.2324	< 0,0001	4.9075	10.7864
Farm/Kidding Year Interaction	112	1.1007	0.6873	1.6014	0.1093	-0.2465	2.4479
Farm/Kidding Year Interaction	113	1.6879	1.2652	1.3342	0.1822	-0.7918	4.1677
Farm/Kidding Year Interaction	114	-0.3	0.6118	-0.4905	0.6238	-1.4991	0.899
Farm/Kidding Year Interaction	115	0.324	1.0486	0.309	0.7573	-1.7313	2.3793
Farm/Kidding Year Interaction	116	1.1079	2.4854	0.4458	0.6558	-3.7635	5.9792
Farm/Kidding Year Interaction	117	1.4504	3.4829	0.4164	0.6771	-5.3761	8.277
Farm/Kidding Year Interaction	118	2.558	0.7666	3.3366	0.0008	1.0554	4.0606
Farm/Kidding Year Interaction	119	3.8073	0.8764	4.3441	< 0,0001	2.0894	5.5251
Farm/Kidding Year Interaction	120	-2.2795	1.115	-2.0444	0.0409	-4.465	-0.094
Farm/Kidding Year Interaction	121	2.3335	1.2981	1.7976	0.0722	-0.2108	4.8778
Farm/Kidding Year Interaction	122	-2.4246	1.097	-2.2102	0.0271	-4.5747	-0.2745
Farm/Kidding Year Interaction	123	-1.3682	1.176	-1.1635	0.2446	-3.6732	0.9367
Farm/Kidding Year Interaction	124	-0.6992	1.2552	-0.5571	0.5775	-3.1595	1.761
Farm/Kidding Year Interaction	125	-1.8046	2.0754	-0.8695	0.3846	-5.8724	2.2632
Farm/Kidding Year Interaction	126	1.5585	1.0992	1.4178	0.1563	-0.5961	3.713
Farm/Kidding Year Interaction	127	1.9495	1.0077	1.9345	0.0531	-0.0257	3.9247
Farm/Kidding Year Interaction	128	1.2619	2.4887	0.507	0.6121	-3.616	6.1397
Farm/Kidding Year Interaction	129	0.233	0.9027	0.2581	0.7963	-1.5363	2.0023
Farm/Kidding Year Interaction	130	2.4467	1.3367	1.8303	0.0672	-0.1733	5.0667
Farm/Kidding Year Interaction	131	0.0002	0.8895	0.0002	0.9998	-1.7432	1.7436
Farm/Kidding Year Interaction	132	0.8895	0.6958	1.2783	0.2011	-0.4744	2.2534
Farm/Kidding Year Interaction	133	1.6184	0.5479	2.954	0.0031	0.5445	2.6922
Farm/Kidding Year Interaction	134	-1.8887	2.8529	-0.662	0.508	-7.4805	3.7031
Farm/Kidding Year Interaction	135	0.8248	0.6909	1.1939	0.2325	-0.5293	2.179
Farm/Kidding Year Interaction	136	1.9597	1.3548	1.4465	0.148	-0.6956	4.615
Farm/Kidding Year Interaction	137	0.5249	0.8151	0.644	0.5196	-1.0726	2.1225
Farm/Kidding Year Interaction	138	2.438	0.604	4.0364	< 0,0001	1.2542	3.6219
Farm/Kidding Year Interaction	139	1.5625	0.9251	1.689	0.0912	-0.2507	3.3756
Farm/Kidding Year Interaction	140	-0.3144	0.7345	-0.4281	0.6686	-1.754	1.1252
Farm/Kidding Year Interaction	141	-0.5515	2.5169	-0.2191	0.8266	-5.4848	4.3817
Farm/Kidding Year Interaction	142	3.5109	0.8313	4.2233	< 0,0001	1.8815	5.1402
Farm/Kidding Year Interaction	143	1.6778	0.745	2.2522	0.0243	0.2177	3.138
Farm/Kidding Year Interaction	144	-0.7912	1.1139	-0.7104	0.4775	-2.9744	1.3919
Farm/Kidding Year Interaction	145	2.855	1.5496	1.8424	0.0654	-0.1822	5.8923
Farm/Kidding Year Interaction	146	-1.0171	1.1939	-0.8519	0.3943	-3.3571	1.323
Farm/Kidding Year Interaction	147	1.5057	0.7578	1.987	0.0469	0.0205	2.991
Farm/Kidding Year Interaction	148	0.9177	0.6719	1.3659	0.172	-0.3992	2.2347
Farm/Kidding Year Interaction	149	1.2101	0.7107	1.7028	0.0886	-0.1828	2.6031
Farm/Kidding Year Interaction	150	1.8931	0.9854	1.9212	0.0547	-0.0382	3.8245
Farm/Kidding Year Interaction	151	2.5667	0.6614	3.8808	0.0001	1.2704	3.8631
Farm/Kidding Year Interaction	152	2.808	0.7474	3.7569	0.0002	1.343	4.2729
Farm/Kidding Year Interaction	153	-0.5231	0.5366	-0.9749	0.3296	-1.5749	0.5286
Farm/Kidding Year Interaction	154	-1.8141	1.8029	-1.0062	0.3143	-5.3477	1.7196
Farm/Kidding Year Interaction	155	-0.2936	1.0442	-0.2811	0.7786	-2.3403	1.7532
Farm/Kidding Year Interaction	156	-0.5889	0.3871	-1.5212	0.1282	-1.3478	0.1699
Farm/Kidding Year Interaction	157	1.2121	1.197	1.0126	0.3113	-1.1341	3.5583
Farm/Kidding Year Interaction	158	0.3918	0.9852	0.3977	0.6908	-1.5391	2.3227
Farm/Kidding Year Interaction	159	0.4526	1.4233	0.318	0.7505	-2.3371	3.2424
Farm/Kidding Year Interaction	160	2.3187	1.1801	1.9648	0.0494	0.0056	4.6318
Farm/Kidding Year Interaction	161	3.9028	1.8344	2.1275	0.0334	0.3072	7.4983
Farm/Kidding Year Interaction	162	0.2708	0.6533	0.4145	0.6785	-1.0097	1.5512
Farm/Kidding Year Interaction	163	-0.2244	1.0826	-0.2072	0.8358	-2.3463	1.8976
Farm/Kidding Year Interaction	164	2.9499	2.5353	1.1636	0.2446	-2.0192	7.9191
Farm/Kidding Year Interaction	165	0.2819	0.6945	0.4059	0.6848	-1.0794	1.6432
Farm/Kidding Year Interaction	166	0.7201	0.6929	1.0393	0.2987	-0.638	2.0781
Farm/Kidding Year Interaction	167	-0.0104	0.7061	-0.0147	0.9882	-1.3943	1.3735
Farm/Kidding Year Interaction	168	1.8481	1.0346	1.7864	0.074	-0.1796	3.8759
Farm/Kidding Year Interaction	169	1.8753	1.0371	1.8083	0.0706	-0.1574	3.908
Farm/Kidding Year Interaction	170	1.0627	1.0363	1.0254	0.3052	-0.9685	3.0938
Farm/Kidding Year Interaction	171	1.6781	1.0851	1.5465	0.122	-0.4488	3.805
Farm/Kidding Year Interaction	172	1.4445	0.6612	2.1847	0.0289	0.1486	2.7404
Farm/Kidding Year Interaction	173	2.0532	0.7153	2.8705	0.0041	0.6513	3.4552
Farm/Kidding Year Interaction	174	0.0728	1.0267	0.0709	0.9435	-1.9396	2.0853
Farm/Kidding Year Interaction	175	0.8373	0.6664	1.2564	0.209	-0.4689	2.1436
Farm/Kidding Year Interaction	176	1.278	0.7198	1.7754	0.0758	-0.1329	2.6888
Farm/Kidding Year Interaction	177	0.9404	0.7994	1.1764	0.2394	-0.6264	2.5073
Farm/Kidding Year Interaction	178	0.7523	0.6673	1.1274	0.2596	-0.5557	2.0603
Farm/Kidding Year Interaction	179	2.2034	0.5125	4.2992	< 0,0001	1.1988	3.2079
Farm/Kidding Year Interaction	180	2.6757	1.3612	1.9657	0.0493	0.0077	5.3438
Farm/Kidding Year Interaction	181	1.8088	2.5009	0.7233	0.4695	-3.093	6.7107
Farm/Kidding Year Interaction	182	6.2641	2.7105	2.311	0.0208	0.9514	11.5768
Farm/Kidding Year Interaction	183	0.7537	1.1555	0.6522	0.5143	-1.5112	3.0186
Farm/Kidding Year Interaction	184	1.6248	1.6303	0.9967	0.3189	-1.5705	4.8202
Farm/Kidding Year Interaction	185	-0.99	0.7097	-1.395	0.163	-2.3809	0.401
Farm/Kidding Year Interaction	186	1.8043	0.9875	1.8272	0.0677	-0.1312	3.7398
Farm/Kidding Year Interaction	187	-0.3003	0.3535	-0.8494	0.3957	-0.9932	0.3926
Farm/Kidding Year Interaction	188	0.4134	0.4197	0.985	0.3246	-0.4092	1.236
Farm/Kidding Year Interaction	189	0.5021	0.7673	0.6543	0.5129	-1.0019	2.0061
Farm/Kidding Year Interaction	190	1.7008	0.5399	3.15	0.0016	0.6425	2.759
Farm/Kidding Year Interaction	191	1.4626	1.2085	1.2103	0.2262	-0.9061	3.8313
Farm/Kidding Year Interaction	192	2.4214	0.7227	3.3503	0.0008	1.0048	3.8379
Farm/Kidding Year Interaction	193	2.0852	0.6814	3.0603	0.0022	0.7497	3.4206
Farm/Kidding Year Interaction	194	2.5304	1.563	1.6189	0.1055	-0.5333	5.594
Farm/Kidding Year Interaction	195	1.8276	0.8908	2.0517	0.0402	0.0816	3.5735
Farm/Kidding Year Interaction	196	2.0219	0.9993	2.0233	0.043	0.0632	3.9806
Farm/Kidding Year Interaction	197	1.6564	0.5168	3.2051	0.0014	0.6434	2.6693
Farm/Kidding Year Interaction	198	2.5486	1.0474	2.4332	0.015	0.4956	4.6015
Farm/Kidding Year Interaction	199	4.2216	1.5086	2.7984	0.0051	1.2647	7.1784
Farm/Kidding Year Interaction	200	1.4351	0.6001	2.3913	0.0168	0.2588	2.6114
Farm/Kidding Year Interaction	201	1.017	0.7142	1.4239	0.1545	-0.3829	2.4168
Farm/Kidding Year Interaction	202	-1.2951	1.1499	-1.1263	0.2601	-3.5488	0.9587
Farm/Kidding Year Interaction	203	-0.3308	0.5074	-0.6519	0.5145	-1.3254	0.6638
Farm/Kidding Year Interaction	204	3.4982	0.5051	6.9261	< 0,0001	2.5082	4.4882
Farm/Kidding Year Interaction	205	-5.7461	3.4828	-1.6498	0.099	-12.5726	1.0803
Farm/Kidding Year Interaction	206	0.627	0.5289	1.1854	0.2359	-0.4097	1.6636
Farm/Kidding Year Interaction	207	3.9307	0.8954	4.3897	< 0,0001	2.1756	5.6858
Farm/Kidding Year Interaction	208	0	0
Farm/Kidding Year Interaction	209	3.9831	0.6142	6.4855	< 0,0001	2.7794	5.1869
Farm/Kidding Year Interaction	210	2.7483	0.6371	4.3138	< 0,0001	1.4996	3.997
Farm/Kidding Year Interaction	211	4.0784	1.2512	3.2596	0.0011	1.6261	6.5307
Farm/Kidding Year Interaction	212	1.5165	0.5284	2.87	0.0041	0.4808	2.5521
Farm/Kidding Year Interaction	213	2.0549	1.4962	1.3735	0.1696	-0.8775	4.9874
Farm/Kidding Year Interaction	214	1.8998	0.6932	2.7407	0.0061	0.5411	3.2585
Farm/Kidding Year Interaction	215	-1.3948	1.5674	-0.8899	0.3735	-4.4669	1.6773
Farm/Kidding Year Interaction	216	7.5459	2.5518	2.9571	0.0031	2.5444	12.5474
Farm/Kidding Year Interaction	217	2.2061	0.7072	3.1196	0.0018	0.82	3.5922
Farm/Kidding Year Interaction	218	5.8561	2.5436	2.3023	0.0213	0.8705	10.8417
Farm/Kidding Year Interaction	219	1.7964	0.6255	2.8721	0.0041	0.5705	3.0224
Farm/Kidding Year Interaction	220	3.07	1.2454	2.4651	0.0137	0.6291	5.511
Farm/Kidding Year Interaction	221	1.6089	0.6235	2.5805	0.0099	0.3869	2.8309
Farm/Kidding Year Interaction	222	1.9753	0.664	2.975	0.0029	0.6739	3.2767
Farm/Kidding Year Interaction	223	0.7186	0.6886	1.0436	0.2967	-0.631	2.0682
Farm/Kidding Year Interaction	224	2.209	0.5532	3.9932	< 0,0001	1.1247	3.2932
Farm/Kidding Year Interaction	225	1.9335	0.5154	3.7517	0.0002	0.9234	2.9437
Farm/Kidding Year Interaction	226	2.5843	1.1777	2.1943	0.0282	0.2759	4.8926
Farm/Kidding Year Interaction	227	1.5365	1.1952	1.2856	0.1986	-0.8061	3.879
Farm/Kidding Year Interaction	228	1.2295	1.0496	1.1715	0.2414	-0.8276	3.2867
Farm/Kidding Year Interaction	229	0.1048	0.6536	0.1603	0.8726	-1.1763	1.3859
Farm/Kidding Year Interaction	230	2.5223	0.9125	2.7641	0.0057	0.7337	4.3109
Farm/Kidding Year Interaction	231	1.4233	0.6246	2.2788	0.0227	0.1991	2.6476
Farm/Kidding Year Interaction	232	2.3321	0.68	3.4298	0.0006	0.9994	3.6648
Farm/Kidding Year Interaction	233	1.4369	0.8059	1.7828	0.0746	-0.1428	3.0165
Farm/Kidding Year Interaction	234	2.544	0.5185	4.9064	< 0,0001	1.5277	3.5603
Farm/Kidding Year Interaction	235	0.2279	1.2296	0.1853	0.853	-2.1821	2.6379
Farm/Kidding Year Interaction	236	-0.7469	0.9857	-0.7577	0.4486	-2.679	1.1851
Farm/Kidding Year Interaction	237	1.1021	0.8952	1.2312	0.2183	-0.6525	2.8567
Farm/Kidding Year Interaction	238	1.7433	0.7218	2.4151	0.0157	0.3285	3.1582
Farm/Kidding Year Interaction	239	0.8241	0.7034	1.1716	0.2414	-0.5546	2.2028
Farm/Kidding Year Interaction	240	-0.3045	0.5867	-0.5189	0.6038	-1.4545	0.8455
Farm/Kidding Year Interaction	241	1.1395	0.6884	1.6551	0.0979	-0.2099	2.4888
Farm/Kidding Year Interaction	242	1.1565	0.4739	2.4402	0.0147	0.2276	2.0854
Farm/Kidding Year Interaction	243	1.6739	0.4548	3.6805	0.0002	0.7825	2.5654
Farm/Kidding Year Interaction	244	0.6619	0.7022	0.9426	0.3459	-0.7144	2.0382
Farm/Kidding Year Interaction	245	2.3237	0.5488	4.234	< 0,0001	1.248	3.3993
Farm/Kidding Year Interaction	246	0	0
Farm/Kidding Year Interaction	247	-0.2844	0.4853	-0.5861	0.5578	-1.2356	0.6667
Farm/Kidding Year Interaction	248	2.4403	1.0602	2.3016	0.0214	0.3622	4.5184
Farm/Kidding Year Interaction	249	0.075	0.723	0.1038	0.9173	-1.3421	1.4921
Farm/Kidding Year Interaction	250	0.8935	0.6541	1.366	0.1719	-0.3886	2.1757
Farm/Kidding Year Interaction	251	2.7458	0.6512	4.2165	< 0,0001	1.4694	4.0221
Farm/Kidding Year Interaction	252	2.8913	0.8227	3.5143	0.0004	1.2788	4.5039
Farm/Kidding Year Interaction	253	1.1483	0.9433	1.2173	0.2235	-0.7006	2.9971
Farm/Kidding Year Interaction	254	3.3897	0.6028	5.6232	< 0,0001	2.2082	4.5713
Farm/Kidding Year Interaction	255	2.618	0.6896	3.7965	0.0001	1.2664	3.9696
Farm/Kidding Year Interaction	256	1.9994	1.0863	1.8407	0.0657	-0.1296	4.1285
Farm/Kidding Year Interaction	257	0.4667	0.642	0.7269	0.4673	-0.7917	1.7251
Farm/Kidding Year Interaction	258	0.3603	0.792	0.455	0.6491	-1.192	1.9127
Farm/Kidding Year Interaction	259	5.9519	1.5561	3.8248	0.0001	2.9018	9.002
Farm/Kidding Year Interaction	260	3.6015	2.5421	1.4167	0.1566	-1.3811	8.5841
Farm/Kidding Year Interaction	261	1.1026	0.6014	1.8334	0.0667	-0.0761	2.2814
Farm/Kidding Year Interaction	262	1.8753	0.6815	2.7519	0.0059	0.5396	3.2111
Farm/Kidding Year Interaction	263	2.8001	1.257	2.2276	0.0259	0.3363	5.2638
Farm/Kidding Year Interaction	264	2.6911	0.7791	3.4542	0.0006	1.1641	4.2181
Farm/Kidding Year Interaction	265	5.3886	1.4478	3.7219	0.0002	2.5509	8.2264
Farm/Kidding Year Interaction	266	1.7063	0.6581	2.5928	0.0095	0.4165	2.9962
Farm/Kidding Year Interaction	267	1.6122	0.7297	2.2095	0.0271	0.1821	3.0424
Farm/Kidding Year Interaction	268	2.8838	0.729	3.956	< 0,0001	1.455	4.3126
Farm/Kidding Year Interaction	269	1.9033	0.706	2.696	0.007	0.5196	3.287
Farm/Kidding Year Interaction	270	2.1448	0.5281	4.0612	< 0,0001	1.1097	3.1799
Farm/Kidding Year Interaction	271	2.4371	0.5086	4.7917	< 0,0001	1.4402	3.434
Farm/Kidding Year Interaction	272	2.1469	0.4628	4.6391	< 0,0001	1.2398	3.054
Farm/Kidding Year Interaction	273	0.9239	1.5251	0.6058	0.5447	-2.0654	3.9131
Farm/Kidding Year Interaction	274	2.2308	0.6597	3.3816	0.0007	0.9378	3.5237
Farm/Kidding Year Interaction	275	0.5063	0.6108	0.829	0.4071	-0.6908	1.7034
Farm/Kidding Year Interaction	276	1.727	0.657	2.6286	0.0086	0.4392	3.0147
Farm/Kidding Year Interaction	277	1.915	1.0472	1.8287	0.0674	-0.1375	3.9674
Farm/Kidding Year Interaction	278	0.5562	0.5408	1.0285	0.3037	-0.5038	1.6161
Farm/Kidding Year Interaction	279	0.6238	0.5265	1.1849	0.2361	-0.4081	1.6557
Farm/Kidding Year Interaction	280	0.6337	1.5016	0.422	0.673	-2.3095	3.5769
Farm/Kidding Year Interaction	281	6.5232	2.5041	2.6049	0.0092	1.615	11.4313
Farm/Kidding Year Interaction	282	0.6143	1.1828	0.5194	0.6035	-1.704	2.9327
Farm/Kidding Year Interaction	283	1.6349	1.1864	1.378	0.1682	-0.6905	3.9602
Farm/Kidding Year Interaction	284	3.9332	2.0864	1.8851	0.0594	-0.1563	8.0226
Farm/Kidding Year Interaction	285	0.3464	0.5449	0.6358	0.5249	-0.7216	1.4145
Farm/Kidding Year Interaction	286	1.751	0.7843	2.2327	0.0256	0.2138	3.2882
Farm/Kidding Year Interaction	287	1.3235	1.1247	1.1767	0.2393	-0.881	3.5279
Farm/Kidding Year Interaction	288	0.0942	1.0665	0.0883	0.9297	-1.9962	2.1845
Farm/Kidding Year Interaction	289	0.8914	1.041	0.8563	0.3918	-1.1489	2.9317
Farm/Kidding Year Interaction	290	2.1623	0.5398	4.0056	< 0,0001	1.1043	3.2204
Farm/Kidding Year Interaction	291	2.1806	1.1945	1.8255	0.0679	-0.1607	4.5219
Farm/Kidding Year Interaction	292	1.3869	0.9733	1.4249	0.1542	-0.5208	3.2946
Farm/Kidding Year Interaction	293	0.6981	0.6922	1.0085	0.3132	-0.6587	2.055
Farm/Kidding Year Interaction	294	0.4851	0.6108	0.7941	0.4272	-0.7122	1.6823
Farm/Kidding Year Interaction	295	-0.248	0.7342	-0.3379	0.7355	-1.687	1.1909
Farm/Kidding Year Interaction	296	2.758	0.7312	3.772	0.0002	1.3249	4.1911
Farm/Kidding Year Interaction	297	3.7992	0.7435	5.1102	< 0,0001	2.342	5.2564
Farm/Kidding Year Interaction	298	0.3019	0.9117	0.3311	0.7406	-1.4851	2.0889
Farm/Kidding Year Interaction	299	1.3026	0.7873	1.6546	0.098	-0.2404	2.8457
Farm/Kidding Year Interaction	300	2.5571	0.5795	4.4124	< 0,0001	1.4212	3.693
Farm/Kidding Year Interaction	301	1.3985	0.7374	1.8966	0.0579	-0.0468	2.8438
Farm/Kidding Year Interaction	302	2.3087	0.7247	3.1858	0.0014	0.8883	3.7291
Farm/Kidding Year Interaction	303	1.5199	0.61	2.4917	0.0127	0.3243	2.7155
Farm/Kidding Year Interaction	304	1.7418	0.5055	3.446	0.0006	0.7511	2.7325
Farm/Kidding Year Interaction	305	1.9697	0.8611	2.2874	0.0222	0.2819	3.6574
Farm/Kidding Year Interaction	306	2.6132	0.4583	5.7016	< 0,0001	1.7149	3.5115
Farm/Kidding Year Interaction	307	2.8779	0.6635	4.3371	< 0,0001	1.5773	4.1784
Farm/Kidding Year Interaction	308	2.107	0.6545	3.2193	0.0013	0.8242	3.3898
Farm/Kidding Year Interaction	309	3.522	0.5334	6.6034	< 0,0001	2.4766	4.5674
Farm/Kidding Year Interaction	310	2.1822	0.7216	3.0242	0.0025	0.7679	3.5964
Farm/Kidding Year Interaction	311	0.1267	0.732	0.1731	0.8626	-1.308	1.5614
Farm/Kidding Year Interaction	312	3.4902	0.5695	6.1287	< 0,0001	2.374	4.6064
Farm/Kidding Year Interaction	313	2.2662	0.8177	2.7714	0.0056	0.6635	3.8689
Farm/Kidding Year Interaction	314	0.3604	0.6197	0.5816	0.5608	-0.8542	1.575
Farm/Kidding Year Interaction	315	1.9932	0.6309	3.1594	0.0016	0.7567	3.2298
Farm/Kidding Year Interaction	316	3.011	0.6997	4.3034	< 0,0001	1.6396	4.3824
Farm/Kidding Year Interaction	317	1.7911	0.8978	1.9949	0.0461	0.0313	3.5509
Farm/Kidding Year Interaction	318	0.7017	0.8939	0.785	0.4325	-1.0503	2.4537
Farm/Kidding Year Interaction	319	0.7619	0.8113	0.9391	0.3477	-0.8282	2.352
Farm/Kidding Year Interaction	320	0.5274	0.8248	0.6394	0.5226	-1.0892	2.144
Farm/Kidding Year Interaction	321	1.2057	1.2753	0.9454	0.3445	-1.2939	3.7052
Farm/Kidding Year Interaction	322	3.0508	1.0546	2.8929	0.0038	0.9838	5.1178
Farm/Kidding Year Interaction	323	2.5847	0.7367	3.5086	0.0005	1.1408	4.0285
Farm/Kidding Year Interaction	324	2.0184	0.7695	2.6231	0.0087	0.5102	3.5265
Farm/Kidding Year Interaction	325	1.3409	0.5253	2.5528	0.0107	0.3114	2.3704
Farm/Kidding Year Interaction	326	3.5381	0.5149	6.8714	< 0,0001	2.5289	4.5474
Farm/Kidding Year Interaction	327	2.6778	0.7114	3.7643	0.0002	1.2835	4.0721
Farm/Kidding Year Interaction	328	2.4541	0.9848	2.4921	0.0127	0.524	4.3843
Farm/Kidding Year Interaction	329	1.1549	0.6627	1.7426	0.0814	-0.1441	2.4539
Farm/Kidding Year Interaction	330	0.9006	0.7186	1.2533	0.2101	-0.5078	2.309
Farm/Kidding Year Interaction	331	3.2357	0.5266	6.1449	< 0,0001	2.2036	4.2678
Farm/Kidding Year Interaction	332	2.0781	1.5205	1.3668	0.1717	-0.9021	5.0583
Farm/Kidding Year Interaction	333	2.5285	0.6827	3.7036	0.0002	1.1904	3.8666
Farm/Kidding Year Interaction	334	2.5635	0.5039	5.0874	< 0,0001	1.5758	3.5511
Farm/Kidding Year Interaction	335	0.782	0.4381	1.785	0.0743	-0.0767	1.6406
Farm/Kidding Year Interaction	336	1.3753	1.0368	1.3265	0.1847	-0.6568	3.4074
Farm/Kidding Year Interaction	337	2.1804	0.6313	3.4542	0.0006	0.9432	3.4177
Farm/Kidding Year Interaction	338	1.7806	0.6306	2.8236	0.0048	0.5446	3.0165
Farm/Kidding Year Interaction	339	3.6004	0.9666	3.7249	0.0002	1.7059	5.4949
Farm/Kidding Year Interaction	340	1.5249	1.2144	1.2557	0.2092	-0.8553	3.9052
Farm/Kidding Year Interaction	341	1.2582	0.7295	1.7247	0.0846	-0.1717	2.688
Farm/Kidding Year Interaction	342	1.4978	0.6352	2.3581	0.0184	0.2529	2.7428
Farm/Kidding Year Interaction	343	2.2055	0.7959	2.7712	0.0056	0.6456	3.7655
Farm/Kidding Year Interaction	344	1.1667	1.144	1.0199	0.3078	-1.0755	3.4089
Farm/Kidding Year Interaction	345	1.3928	1.8662	0.7463	0.4555	-2.265	5.0506
Farm/Kidding Year Interaction	346	0.6927	1.8019	0.3844	0.7007	-2.839	4.2244
Farm/Kidding Year Interaction	347	1.8429	0.7997	2.3045	0.0212	0.2754	3.4103
Farm/Kidding Year Interaction	348	1.0746	1.0116	1.0623	0.2881	-0.9082	3.0573
Farm/Kidding Year Interaction	349	2.0158	0.6926	2.9103	0.0036	0.6582	3.3734
Farm/Kidding Year Interaction	350	2.7788	1.0037	2.7685	0.0056	0.8115	4.746
Farm/Kidding Year Interaction	351	-0.6476	0.9194	-0.7043	0.4812	-2.4496	1.1545
Farm/Kidding Year Interaction	352	-0.9392	1.7674	-0.5314	0.5952	-4.4033	2.525
Farm/Kidding Year Interaction	353	4.1492	1.1047	3.7561	0.0002	1.9841	6.3144
Farm/Kidding Year Interaction	354	3.1661	0.9021	3.5098	0.0004	1.398	4.9342
Farm/Kidding Year Interaction	355	2.8199	0.9571	2.9464	0.0032	0.944	4.6958
Farm/Kidding Year Interaction	356	0.5943	0.9288	0.6398	0.5223	-1.2262	2.4148
Farm/Kidding Year Interaction	357	0.904	1.2975	0.6968	0.486	-1.6391	3.4472
Farm/Kidding Year Interaction	358	3.0936	0.5452	5.6746	< 0,0001	2.0251	4.1622
Farm/Kidding Year Interaction	359	-0.8717	1.7551	-0.4966	0.6194	-4.3117	2.5683
Farm/Kidding Year Interaction	360	0	0
Farm/Kidding Year Interaction	361	2.8467	0.4601	6.187	< 0,0001	1.9449	3.7485
Farm/Kidding Year Interaction	362	2.4496	0.9171	2.671	0.0076	0.6521	4.2471
Farm/Kidding Year Interaction	363	2.0317	0.9935	2.045	0.0409	0.0844	3.9791
Farm/Kidding Year Interaction	364	3.2517	0.6941	4.6845	< 0,0001	1.8912	4.6122
Farm/Kidding Year Interaction	365	3.584	0.5273	6.797	< 0,0001	2.5505	4.6176
Farm/Kidding Year Interaction	366	1.7455	1.5265	1.1435	0.2528	-1.2465	4.7375
Farm/Kidding Year Interaction	367	3.5803	0.6683	5.3572	< 0,0001	2.2704	4.8903
Farm/Kidding Year Interaction	368	3.2874	0.713	4.6108	< 0,0001	1.89	4.6849
Farm/Kidding Year Interaction	369	3.7645	0.5191	7.2517	< 0,0001	2.747	4.7819
Farm/Kidding Year Interaction	370	2.3863	1.246	1.9152	0.0555	-0.0559	4.8284
Farm/Kidding Year Interaction	371	1.7222	0.6512	2.6447	0.0082	0.4458	2.9986
Farm/Kidding Year Interaction	372	-0.2884	1.2217	-0.2361	0.8134	-2.6829	2.1061
Farm/Kidding Year Interaction	373	0.9756	0.6339	1.539	0.1238	-0.2669	2.2181
Farm/Kidding Year Interaction	374	1.7762	0.6852	2.592	0.0095	0.4331	3.1192
Farm/Kidding Year Interaction	375	1.6574	0.6631	2.4993	0.0124	0.3576	2.9571
Farm/Kidding Year Interaction	376	0.9576	0.7885	1.2145	0.2245	-0.5878	2.5031
Farm/Kidding Year Interaction	377	2.9286	0.6261	4.6779	< 0,0001	1.7015	4.1557
Farm/Kidding Year Interaction	378	2.009	0.7303	2.7511	0.0059	0.5777	3.4403
Farm/Kidding Year Interaction	379	0.8797	0.984	0.894	0.3713	-1.0489	2.8084
Farm/Kidding Year Interaction	380	0	0
Farm/Kidding Year Interaction	381	3.4825	0.8099	4.3001	< 0,0001	1.8951	5.0699
Farm/Kidding Year Interaction	382	4.8063	1.0307	4.6629	< 0,0001	2.786	6.8266
Farm/Kidding Year Interaction	383	0	0
Farm/Kidding Year Interaction	384	3.9481	0.6943	5.6866	< 0,0001	2.5873	5.3089
Farm/Kidding Year Interaction	385	1.6827	1.0715	1.5704	0.1163	-0.4175	3.783
Farm/Kidding Year Interaction	386	-2.7928	1.7646	-1.5827	0.1135	-6.2514	0.6658
Farm/Kidding Year Interaction	387	0	0
Farm/Kidding Year Interaction	388	0.2734	1.8017	0.1518	0.8794	-3.258	3.8049
Farm/Kidding Year Interaction	389	1.5953	0.6454	2.4717	0.0135	0.3302	2.8603
Farm/Kidding Year Interaction	390	1.0891	0.6348	1.7156	0.0862	-0.1552	2.3334
Farm/Kidding Year Interaction	391	1.188	0.578	2.0555	0.0398	0.0552	2.3208
Farm/Kidding Year Interaction	392	0.8597	2.7108	0.3171	0.7511	-4.4535	6.1729
Farm/Kidding Year Interaction	393	1.8459	0.7975	2.3146	0.0206	0.2828	3.4091
Farm/Kidding Year Interaction	394	2.4867	0.6689	3.7178	0.0002	1.1757	3.7977
Farm/Kidding Year Interaction	395	0.0814	1.936	0.0421	0.9664	-3.7132	3.8761
Farm/Kidding Year Interaction	396	0	0
Farm/Kidding Year Interaction	397	2.0148	0.8258	2.4397	0.0147	0.3962	3.6334
Farm/Kidding Year Interaction	398	1.1582	1.7922	0.6463	0.5181	-2.3545	4.6709
Farm/Kidding Year Interaction	399	1.427	1.9382	0.7362	0.4616	-2.372	5.2259
Farm/Kidding Year Interaction	400	3.3902	0.904	3.7504	0.0002	1.6184	5.162
Farm/Kidding Year Interaction	401	4.5034	1.332	3.381	0.0007	1.8927	7.1142
Farm/Kidding Year Interaction	402	0.6053	0.7417	0.8161	0.4145	-0.8485	2.0591
Farm/Kidding Year Interaction	403	0	0
Farm/Kidding Year Interaction	404	3.0359	0.6788	4.4724	< 0,0001	1.7054	4.3664
Farm/Kidding Year Interaction	405	0	0
Farm/Kidding Year Interaction	406	0	0
Farm/Kidding Year Interaction	407	0	0
Farm/Kidding Year Interaction	408	0	0
Farm/Kidding Year Interaction	409	0	0
Farm/Kidding Year Interaction	410	0	0
Farm/Kidding Year Interaction	411	0	0
Farm/Kidding Year Interaction	412	0	0
Farm/Kidding Year Interaction	413	0	0
Farm/Kidding Year Interaction	414	0	0
Farm/Kidding Year Interaction	415	0	0
Farm/Kidding Year Interaction	416	0	0
Farm/Kidding Year Interaction	417	0	0
Farm/Kidding Year Interaction	418	0	0
Farm/Kidding Year Interaction	419	0	0
Farm/Kidding Year Interaction	420	0	0
Farm/Kidding Year Interaction	421	0	0
Farm/Kidding Year Interaction	422	0	0
Farm/Kidding Year Interaction	423	0	0
Farm/Kidding Year Interaction	424	0	0
Farm/Kidding Year Interaction	425	0	0
Farm/Kidding Year Interaction	426	0	0
Farm/Kidding Year Interaction	427	0	0
Farm/Kidding Year Interaction	428	0	0
Farm/Kidding Year Interaction	429	0	0
Farm/Kidding Year Interaction	430	0	0
Farm/Kidding Year Interaction	431	0	0
Farm/Kidding Year Interaction	432	0	0
Farm/Kidding Year Interaction	433	0	0
Farm/Kidding Year Interaction	434	0	0
Farm/Kidding Year Interaction	435	0	0
Farm/Kidding Year Interaction	436	0	0
Farm/Kidding Year Interaction	437	0	0
Farm/Kidding Year Interaction	438	0	0
Farm/Kidding Year Interaction	439	0	0
Farm/Kidding Year Interaction	440	0	0
Farm/Kidding Year Interaction	441	0	0
Farm/Kidding Year Interaction	442	0	0
Farm/Kidding Year Interaction	443	0	0
Farm/Kidding Year Interaction	444	0	0
Farm/Kidding Year Interaction	445	0	0
Farm/Kidding Year Interaction	446	0	0
Farm/Kidding Year Interaction	447	0	0
Farm/Kidding Year Interaction	448	0	0
Farm/Kidding Year Interaction	449	0	0
Farm/Kidding Year Interaction	450	0	0
Farm/Kidding Year Interaction	451	0	0
Farm/Kidding Year Interaction	452	0	0
Farm/Kidding Year Interaction	453	0	0
Farm/Kidding Year Interaction	454	0	0
Farm/Kidding Year Interaction	455	0	0
Farm/Kidding Year Interaction	456	0	0
Farm/Kidding Year Interaction	457	0	0
Farm/Kidding Year Interaction	458	0	0
Farm/Kidding Year Interaction	459	0	0
Farm/Kidding Year Interaction	460	0	0
Farm/Kidding Year Interaction	461	0	0
Farm/Kidding Year Interaction	462	0	0
Farm/Kidding Year Interaction	463	0	0
Farm/Kidding Year Interaction	464	0	0
Farm/Kidding Year Interaction	465	0	0
Farm/Kidding Year Interaction	466	0	0
Farm/Kidding Year Interaction	467	0	0
Farm/Kidding Year Interaction	468	0	0
Farm/Kidding Year Interaction	469	0	0
Farm/Kidding Year Interaction	470	0	0
Farm/Kidding Year Interaction	471	0	0
Farm/Kidding Year Interaction	472	0	0
Farm/Kidding Year Interaction	473	0	0
Farm/Kidding Year Interaction	474	0	0
Farm/Kidding Year Interaction	475	0	0
Farm/Kidding Year Interaction	476	0	0

## Sheet: Angulosity
Parameter/Fixed Effect/Covariate	Level	Value	Standard error	t	Pr > |t|	Lower bound (95%)	Upper bound (95%)
Intercept	Intercept	99.666	4.4871	22.2115	< 0,0001	90.8711	108.461
Age (in years)	Age (in years)	1.1658	0.0458	25.4783	< 0,0001	1.0761	1.2555
Days in Milk	Days in Milk	0.0317	0.0008	37.3194	< 0,0001	0.03	0.0334
Farm	1	-2.0455	4.3292	-0.4725	0.6366	-10.5309	6.4399
Farm	2	-0.923	4.6971	-0.1965	0.8442	-10.1294	8.2834
Farm	3	-5.5079	4.8554	-1.1344	0.2566	-15.0246	4.0088
Farm	4	-4.3861	4.336	-1.0116	0.3118	-12.8846	4.1125
Farm	5	-7.8717	4.5181	-1.7423	0.0815	-16.7272	0.9839
Farm	6	0.0888	10.4149	0.0085	0.9932	-20.3246	20.5022
Farm	7	-14.1497	4.9489	-2.8591	0.0042	-23.8497	-4.4497
Farm	8	-11.8387	4.3255	-2.737	0.0062	-20.3167	-3.3607
Farm	9	-12.9168	4.3656	-2.9588	0.0031	-21.4735	-4.3601
Farm	10	-2.5722	4.6175	-0.557	0.5775	-11.6227	6.4783
Farm	11	-5.5239	7.8657	-0.7023	0.4825	-20.9408	9.8929
Farm	12	-11.2334	10.2945	-1.0912	0.2752	-31.4109	8.9441
Farm	13	-5.0872	4.4139	-1.1526	0.2491	-13.7386	3.5641
Farm	14	-8.9171	7.8688	-1.1332	0.2571	-24.3401	6.5059
Farm	15	-6.2478	5.2397	-1.1924	0.2331	-16.5177	4.0222
Farm	16	-5.8418	4.6174	-1.2652	0.2058	-14.8921	3.2084
Farm	17	-18.3658	8.0202	-2.2899	0.022	-34.0856	-2.646
Farm	18	-0.0128	4.6353	-0.0028	0.9978	-9.0981	9.0725
Farm	19	-3.9323	5.246	-0.7496	0.4535	-14.2146	6.3499
Farm	20	-9.8633	5.236	-1.8838	0.0596	-20.126	0.3993
Farm	21	-4.1622	4.6748	-0.8904	0.3733	-13.3249	5.0005
Farm	22	10.8322	10.2946	1.0522	0.2927	-9.3454	31.0099
Farm	23	-17.4098	4.6687	-3.729	0.0002	-26.5606	-8.259
Farm	24	-10.3359	4.6521	-2.2218	0.0263	-19.4541	-1.2178
Farm	25	-4.5752	5.0107	-0.9131	0.3612	-14.3962	5.2458
Farm	26	-5.8348	5.6972	-1.0241	0.3058	-17.0015	5.332
Farm	27	-8.2729	7.8587	-1.0527	0.2925	-23.676	7.1303
Farm	28	-2.4462	5.6879	-0.4301	0.6671	-13.5945	8.7021
Farm	29	-1.3557	4.6371	-0.2924	0.77	-10.4445	7.7331
Farm	30	-10.9169	4.6312	-2.3573	0.0184	-19.9941	-1.8398
Farm	31	-5.8826	5.0107	-1.174	0.2404	-15.7036	3.9384
Farm	32	-5.6331	4.8554	-1.1602	0.246	-15.1497	3.8836
Farm	33	9.0217	6.3096	1.4298	0.1528	-3.3453	21.3887
Farm	34	-14.9164	5.5042	-2.71	0.0067	-25.7049	-4.128
Farm	35	-5.7635	7.8656	-0.7327	0.4637	-21.1802	9.6533
Farm	36	-31.5411	4.612	-6.8389	< 0,0001	-40.5807	-22.5015
Farm	37	-5.308	10.2949	-0.5156	0.6061	-25.4862	14.8702
Farm	38	-3.5907	4.8938	-0.7337	0.4631	-13.1827	6.0013
Farm	39	-3.743	10.2945	-0.3636	0.7162	-23.9205	16.4345
Farm	40	-5.0786	4.5271	-1.1218	0.2619	-13.9519	3.7946
Farm	41	-7.4329	4.3368	-1.7139	0.0866	-15.9332	1.0674
Farm	42	-5.7298	6.4902	-0.8828	0.3773	-18.4507	6.9912
Farm	43	-7.258	5.9448	-1.2209	0.2221	-18.91	4.394
Farm	44	-5.5118	4.6174	-1.1937	0.2326	-14.562	3.5385
Farm	45	-5.1738	4.3601	-1.1866	0.2354	-13.7197	3.3721
Farm	46	-6.867	7.8655	-0.8731	0.3826	-22.2835	8.5495
Farm	47	-0.1399	5.365	-0.0261	0.9792	-10.6554	10.3757
Farm	48	-18.474	5.1473	-3.5891	0.0003	-28.5628	-8.3853
Farm	49	-8.2311	4.6017	-1.7887	0.0737	-17.2505	0.7883
Farm	50	-0.1502	4.8527	-0.031	0.9753	-9.6616	9.3612
Farm	51	-8.2864	4.271	-1.9402	0.0524	-16.6576	0.0848
Farm	52	-7.1979	5.5099	-1.3064	0.1914	-17.9973	3.6016
Farm	53	-2.8831	5.1553	-0.5592	0.576	-12.9876	7.2214
Farm	54	0.6856	5.9405	0.1154	0.9081	-10.958	12.3291
Farm	55	-1.2973	5.3007	-0.2447	0.8067	-11.6869	9.0922
Farm	56	-10.2067	4.657	-2.1917	0.0284	-19.3344	-1.0789
Farm	57	-7.383	4.5267	-1.631	0.1029	-16.2555	1.4895
Farm	58	5.0346	10.2945	0.4891	0.6248	-15.1429	25.2121
Farm	59	-6.7806	4.5873	-1.4781	0.1394	-15.7717	2.2105
Farm	60	1.1559	6.8675	0.1683	0.8663	-12.3046	14.6164
Farm	61	-4.2448	4.5268	-0.9377	0.3484	-13.1175	4.6279
Farm	62	-7.2427	4.6551	-1.5559	0.1197	-16.3667	1.8813
Farm	63	-20.2581	6.863	-2.9518	0.0032	-33.7097	-6.8064
Farm	64	-7.6856	5.3592	-1.4341	0.1516	-18.1898	2.8186
Farm	65	1.377	5.1493	0.2674	0.7892	-8.7159	11.4698
Farm	66	-15.47	4.7185	-3.2786	0.001	-24.7183	-6.2217
Farm	67	0.8857	7.8667	0.1126	0.9104	-14.5332	16.3046
Farm	68	0.9402	4.6068	0.2041	0.8383	-8.0891	9.9696
Farm	69	-5.9947	10.2951	-0.5823	0.5604	-26.1734	14.184
Farm	70	-17.2267	7.0352	-2.4487	0.0143	-31.0159	-3.4376
Farm	71	0.1445	5.5008	0.0263	0.979	-10.6372	10.9261
Farm	72	-4.5886	5.9509	-0.7711	0.4407	-16.2524	7.0753
Farm	73	-4.256	4.9476	-0.8602	0.3897	-13.9534	5.4414
Farm	74	-1.023	6.3099	-0.1621	0.8712	-13.3905	11.3445
Farm	75	-12.8048	10.2949	-1.2438	0.2136	-32.983	7.3734
Farm	76	-18.6286	4.4505	-4.1858	< 0,0001	-27.3516	-9.9056
Farm	77	-3.6472	10.2945	-0.3543	0.7231	-23.8247	16.5303
Farm	78	-7.3488	8.0141	-0.917	0.3592	-23.0566	8.3591
Farm	79	-11.3965	4.5896	-2.4831	0.013	-20.3921	-2.4008
Farm	80	-9.8073	5.7181	-1.7152	0.0863	-21.0149	1.4002
Farm	81	-4.7195	6.3099	-0.748	0.4545	-17.087	7.6479
Farm	82	-16.8459	10.4128	-1.6178	0.1057	-37.2552	3.5635
Farm	83	-5.1716	4.538	-1.1396	0.2545	-14.0662	3.7231
Farm	84	-6.6827	4.3909	-1.5219	0.128	-15.289	1.9237
Farm	85	-4.013	4.5083	-0.8902	0.3734	-12.8493	4.8232
Farm	86	0	0
Sex	Buck	-2.8328	1.5251	-1.8574	0.0633	-5.8221	0.1564
Sex	Doe	0	0
Lactation Stage/Maturity	Primiparous	-4.4781	0.1519	-29.4787	< 0,0001	-4.7759	-4.1804
Lactation Stage/Maturity	Multiparous	0	0
Lactation Stage/Maturity	Buckling	-3.2477	0.5584	-5.8165	< 0,0001	-4.3422	-2.1533
Lactation Stage/Maturity	Buck	0	0
Kidding Month	January	0.098	0.3036	0.3228	0.7469	-0.4971	0.6932
Kidding Month	February	-0.5108	0.3074	-1.6619	0.0965	-1.1133	0.0916
Kidding Month	March	-0.924	0.319	-2.8964	0.0038	-1.5492	-0.2987
Kidding Month	April	0.4305	0.3109	1.3849	0.1661	-0.1788	1.0399
Kidding Month	May	-0.2153	0.3306	-0.6513	0.5149	-0.8633	0.4327
Kidding Month	June	-0.1616	0.3444	-0.4694	0.6388	-0.8366	0.5133
Kidding Month	July	2.059	0.4049	5.0849	< 0,0001	1.2654	2.8527
Kidding Month	August	1.6349	0.3251	5.0291	< 0,0001	0.9977	2.2721
Kidding Month	September	1.0761	0.3327	3.2341	0.0012	0.4239	1.7283
Kidding Month	October	0.5759	0.3169	1.8174	0.0692	-0.0452	1.1971
Kidding Month	November	0.5794	0.2969	1.9514	0.051	-0.0026	1.1614
Kidding Month	December	0	0
Kidding Season	Winter	0	0
Kidding Season	Spring	0	0
Kidding Season	Summer	0	0
Kidding Season	Autumn	0	0
Farm/Kidding Year Interaction	1	-9.0907	4.5953	-1.9782	0.0479	-18.0977	-0.0837
Farm/Kidding Year Interaction	2	-11.6292	3.9022	-2.9801	0.0029	-19.2777	-3.9807
Farm/Kidding Year Interaction	3	-3.4422	3.6642	-0.9394	0.3475	-10.624	3.7397
Farm/Kidding Year Interaction	4	2.4035	2.164	1.1107	0.2667	-1.838	6.645
Farm/Kidding Year Interaction	5	-6.9838	3.5167	-1.9859	0.047	-13.8766	-0.0911
Farm/Kidding Year Interaction	6	-8.4491	8.011	-1.0547	0.2916	-24.1509	7.2527
Farm/Kidding Year Interaction	7	7.449	8.708	0.8554	0.3923	-9.6189	24.5169
Farm/Kidding Year Interaction	8	-18.0808	9.6403	-1.8755	0.0607	-36.976	0.8145
Farm/Kidding Year Interaction	9	-48.5396	11.7103	-4.145	< 0,0001	-71.4922	-25.5871
Farm/Kidding Year Interaction	10	1.3585	2.0684	0.6568	0.5113	-2.6956	5.4125
Farm/Kidding Year Interaction	11	0	0
Farm/Kidding Year Interaction	12	-2.2693	3.1047	-0.7309	0.4648	-8.3545	3.816
Farm/Kidding Year Interaction	13	-10.0212	9.603	-1.0435	0.2967	-28.8433	8.801
Farm/Kidding Year Interaction	14	-5.842	4.5944	-1.2716	0.2035	-14.8471	3.163
Farm/Kidding Year Interaction	15	-3.5331	10.4024	-0.3396	0.7341	-23.922	16.8558
Farm/Kidding Year Interaction	16	0	0
Farm/Kidding Year Interaction	17	-19.9041	9.5817	-2.0773	0.0378	-38.6845	-1.1237
Farm/Kidding Year Interaction	18	-0.7292	9.8012	-0.0744	0.9407	-19.9397	18.4813
Farm/Kidding Year Interaction	19	-6.5517	10.2585	-0.6387	0.523	-26.6585	13.5551
Farm/Kidding Year Interaction	20	-4.9725	1.9023	-2.6139	0.009	-8.701	-1.2439
Farm/Kidding Year Interaction	21	-10.7623	3.2938	-3.2674	0.0011	-17.2182	-4.3063
Farm/Kidding Year Interaction	22	-1.2654	1.9533	-0.6478	0.5171	-5.094	2.5632
Farm/Kidding Year Interaction	23	6.3324	9.602	0.6595	0.5096	-12.4877	25.1525
Farm/Kidding Year Interaction	24	-7.2866	2.8409	-2.5648	0.0103	-12.8549	-1.7182
Farm/Kidding Year Interaction	25	-0.7046	2.6095	-0.27	0.7872	-5.8192	4.4101
Farm/Kidding Year Interaction	26	-4.551	2.9836	-1.5254	0.1272	-10.3989	1.2969
Farm/Kidding Year Interaction	27	0.984	6.4847	0.1517	0.8794	-11.7261	13.6941
Farm/Kidding Year Interaction	28	-21.3341	7.1423	-2.987	0.0028	-35.3331	-7.3351
Farm/Kidding Year Interaction	29	-2.7017	2.182	-1.2382	0.2156	-6.9784	1.575
Farm/Kidding Year Interaction	30	-5.9743	2.8003	-2.1334	0.0329	-11.463	-0.4856
Farm/Kidding Year Interaction	31	-2.4228	1.916	-1.2645	0.206	-6.1782	1.3325
Farm/Kidding Year Interaction	32	0	0
Farm/Kidding Year Interaction	33	-13.0675	2.5694	-5.0857	< 0,0001	-18.1036	-8.0313
Farm/Kidding Year Interaction	34	-11.3098	6.9239	-1.6334	0.1024	-24.8808	2.2612
Farm/Kidding Year Interaction	35	-8.2361	2.4805	-3.3203	0.0009	-13.098	-3.3742
Farm/Kidding Year Interaction	36	-6.3863	2.5562	-2.4984	0.0125	-11.3965	-1.3761
Farm/Kidding Year Interaction	37	-30.702	7.0571	-4.3505	< 0,0001	-44.5342	-16.8699
Farm/Kidding Year Interaction	38	-5.03	2.0577	-2.4444	0.0145	-9.0632	-0.9968
Farm/Kidding Year Interaction	39	-4.9461	6.9231	-0.7144	0.475	-18.5155	8.6233
Farm/Kidding Year Interaction	40	-5.4221	2.3645	-2.2932	0.0218	-10.0565	-0.7877
Farm/Kidding Year Interaction	41	-12.2403	2.9278	-4.1808	< 0,0001	-17.9788	-6.5018
Farm/Kidding Year Interaction	42	-8.0857	3.5543	-2.2749	0.0229	-15.0523	-1.1192
Farm/Kidding Year Interaction	43	-16.2649	7.504	-2.1675	0.0302	-30.9729	-1.5569
Farm/Kidding Year Interaction	44	-13.3619	13.2902	-1.0054	0.3147	-39.411	12.6872
Farm/Kidding Year Interaction	45	-4.9069	2.6253	-1.8691	0.0616	-10.0525	0.2386
Farm/Kidding Year Interaction	46	-19.4403	7.0964	-2.7395	0.0062	-33.3493	-5.5312
Farm/Kidding Year Interaction	47	6.081	11.5065	0.5285	0.5972	-16.472	28.634
Farm/Kidding Year Interaction	48	-8.1942	2.3028	-3.5584	0.0004	-12.7077	-3.6807
Farm/Kidding Year Interaction	49	-14.742	3.5396	-4.1649	< 0,0001	-21.6796	-7.8043
Farm/Kidding Year Interaction	50	1.3252	2.7067	0.4896	0.6244	-3.9799	6.6303
Farm/Kidding Year Interaction	51	-0.1287	2.7354	-0.0471	0.9625	-5.4902	5.2327
Farm/Kidding Year Interaction	52	-4.297	2.021	-2.1262	0.0335	-8.2582	-0.3359
Farm/Kidding Year Interaction	53	-1.4607	5.224	-0.2796	0.7798	-11.6999	8.7784
Farm/Kidding Year Interaction	54	-4.6014	2.7079	-1.6993	0.0893	-9.909	0.7061
Farm/Kidding Year Interaction	55	-6.0316	2.9012	-2.079	0.0376	-11.718	-0.3453
Farm/Kidding Year Interaction	56	0	0
Farm/Kidding Year Interaction	57	-3.3049	2.1941	-1.5062	0.132	-7.6053	0.9956
Farm/Kidding Year Interaction	58	-4.3895	2.4484	-1.7928	0.073	-9.1884	0.4095
Farm/Kidding Year Interaction	59	2.1875	3.7596	0.5819	0.5607	-5.1813	9.5563
Farm/Kidding Year Interaction	60	-2.2542	3.0881	-0.73	0.4654	-8.3069	3.7985
Farm/Kidding Year Interaction	61	-4.7266	2.9946	-1.5784	0.1145	-10.5961	1.1429
Farm/Kidding Year Interaction	62	-11.1205	5.1257	-2.1696	0.03	-21.167	-1.074
Farm/Kidding Year Interaction	63	-1.4825	2.0004	-0.7411	0.4586	-5.4033	2.4382
Farm/Kidding Year Interaction	64	-22.3138	4.3158	-5.1703	< 0,0001	-30.7728	-13.8548
Farm/Kidding Year Interaction	65	-9.4353	4.3551	-2.1665	0.0303	-17.9714	-0.8992
Farm/Kidding Year Interaction	66	-1.6017	2.6606	-0.602	0.5472	-6.8166	3.6132
Farm/Kidding Year Interaction	67	0	0
Farm/Kidding Year Interaction	68	-5.2736	2.189	-2.4091	0.016	-9.5641	-0.9831
Farm/Kidding Year Interaction	69	-1.1999	2.0788	-0.5772	0.5638	-5.2743	2.8746
Farm/Kidding Year Interaction	70	-4.8455	6.9481	-0.6974	0.4856	-18.4639	8.7729
Farm/Kidding Year Interaction	71	-2.5854	5.0079	-0.5163	0.6057	-12.4011	7.2303
Farm/Kidding Year Interaction	72	-3.8385	5.0548	-0.7594	0.4476	-13.746	6.069
Farm/Kidding Year Interaction	73	-12.9025	8.2844	-1.5574	0.1194	-29.1401	3.3351
Farm/Kidding Year Interaction	74	-3.235	3.3363	-0.9696	0.3322	-9.7743	3.3043
Farm/Kidding Year Interaction	75	-2.2782	3.1913	-0.7139	0.4753	-8.5332	3.9767
Farm/Kidding Year Interaction	76	-21.3029	5.2421	-4.0638	< 0,0001	-31.5774	-11.0283
Farm/Kidding Year Interaction	77	0	0
Farm/Kidding Year Interaction	78	-8.0915	2.3416	-3.4555	0.0005	-12.6812	-3.5019
Farm/Kidding Year Interaction	79	-9.1887	2.0168	-4.5562	< 0,0001	-13.1416	-5.2359
Farm/Kidding Year Interaction	80	-19.9809	5.7122	-3.4979	0.0005	-31.177	-8.7848
Farm/Kidding Year Interaction	81	-16.0591	5.6799	-2.8273	0.0047	-27.1919	-4.9263
Farm/Kidding Year Interaction	82	-43.2467	10.9691	-3.9426	< 0,0001	-64.7464	-21.747
Farm/Kidding Year Interaction	83	-60.1763	8.7473	-6.8794	< 0,0001	-77.3211	-43.0314
Farm/Kidding Year Interaction	84	-5.3862	2.7126	-1.9856	0.0471	-10.703	-0.0693
Farm/Kidding Year Interaction	85	-11.1555	2.6375	-4.2296	< 0,0001	-16.3251	-5.986
Farm/Kidding Year Interaction	86	0	0
Farm/Kidding Year Interaction	87	-8.6977	9.624	-0.9038	0.3661	-27.5609	10.1655
Farm/Kidding Year Interaction	88	-5.3246	9.8672	-0.5396	0.5895	-24.6646	14.0153
Farm/Kidding Year Interaction	89	-10.9499	3.5381	-3.0948	0.002	-17.8847	-4.015
Farm/Kidding Year Interaction	90	-8.7521	2.6715	-3.276	0.0011	-13.9884	-3.5158
Farm/Kidding Year Interaction	91	-8.9369	2.6805	-3.334	0.0009	-14.1908	-3.683
Farm/Kidding Year Interaction	92	-4.5512	1.8341	-2.4814	0.0131	-8.146	-0.9563
Farm/Kidding Year Interaction	93	-4.363	1.7508	-2.492	0.0127	-7.7946	-0.9314
Farm/Kidding Year Interaction	94	-28.2257	9.5817	-2.9458	0.0032	-47.0061	-9.4453
Farm/Kidding Year Interaction	95	-15.0792	6.8776	-2.1925	0.0283	-28.5595	-1.599
Farm/Kidding Year Interaction	96	-7.0964	10.4077	-0.6818	0.4953	-27.4957	13.3029
Farm/Kidding Year Interaction	97	-8.2178	6.2551	-1.3138	0.1889	-20.4779	4.0423
Farm/Kidding Year Interaction	98	-5.2269	3.3429	-1.5636	0.1179	-11.7789	1.3252
Farm/Kidding Year Interaction	99	-9.1526	3.7034	-2.4714	0.0135	-16.4114	-1.8938
Farm/Kidding Year Interaction	100	-8.5106	3.6987	-2.301	0.0214	-15.76	-1.2611
Farm/Kidding Year Interaction	101	-3.3393	2.6433	-1.2633	0.2065	-8.5203	1.8417
Farm/Kidding Year Interaction	102	-9.2366	4.9897	-1.8511	0.0642	-19.0166	0.5434
Farm/Kidding Year Interaction	103	-10.9548	5.1105	-2.1436	0.0321	-20.9716	-0.9381
Farm/Kidding Year Interaction	104	-25.6472	10.6214	-2.4147	0.0158	-46.4655	-4.8289
Farm/Kidding Year Interaction	105	2.33	2.0443	1.1398	0.2544	-1.6768	6.3368
Farm/Kidding Year Interaction	106	1.1884	2.0094	0.5914	0.5543	-2.7502	5.1269
Farm/Kidding Year Interaction	107	-19.401	9.6321	-2.0142	0.044	-38.2801	-0.522
Farm/Kidding Year Interaction	108	-1.8557	5.7753	-0.3213	0.748	-13.1754	9.464
Farm/Kidding Year Interaction	109	-2.569	2.1818	-1.1775	0.239	-6.8453	1.7073
Farm/Kidding Year Interaction	110	1.2906	1.9027	0.6783	0.4976	-2.4387	5.0199
Farm/Kidding Year Interaction	111	-11.4408	5.7578	-1.987	0.0469	-22.7262	-0.1555
Farm/Kidding Year Interaction	112	2.2665	2.6388	0.8589	0.3904	-2.9057	7.4387
Farm/Kidding Year Interaction	113	2.6167	4.8573	0.5387	0.5901	-6.9037	12.1372
Farm/Kidding Year Interaction	114	-0.5161	2.3488	-0.2197	0.8261	-5.1198	4.0875
Farm/Kidding Year Interaction	115	-7.2925	4.026	-1.8114	0.0701	-15.1835	0.5985
Farm/Kidding Year Interaction	116	-17.1064	9.542	-1.7927	0.073	-35.8089	1.5962
Farm/Kidding Year Interaction	117	-10.7542	13.3719	-0.8042	0.4213	-36.9634	15.455
Farm/Kidding Year Interaction	118	-7.3107	2.9433	-2.4838	0.013	-13.0797	-1.5417
Farm/Kidding Year Interaction	119	-11.7285	3.3648	-3.4856	0.0005	-18.3237	-5.1334
Farm/Kidding Year Interaction	120	-4.2855	4.2809	-1.0011	0.3168	-12.6762	4.1052
Farm/Kidding Year Interaction	121	-41.6763	4.9838	-8.3623	< 0,0001	-51.4447	-31.9079
Farm/Kidding Year Interaction	122	-4.3013	4.2116	-1.0213	0.3071	-12.5562	3.9536
Farm/Kidding Year Interaction	123	-19.2094	4.515	-4.2546	< 0,0001	-28.0589	-10.3599
Farm/Kidding Year Interaction	124	-31.9627	4.8192	-6.6324	< 0,0001	-41.4084	-22.517
Farm/Kidding Year Interaction	125	-40.8786	7.968	-5.1304	< 0,0001	-56.496	-25.2612
Farm/Kidding Year Interaction	126	-19.3193	4.2203	-4.5777	< 0,0001	-27.5913	-11.0474
Farm/Kidding Year Interaction	127	-16.6859	3.869	-4.3127	< 0,0001	-24.2692	-9.1025
Farm/Kidding Year Interaction	128	-13.4471	9.5548	-1.4074	0.1593	-32.1748	5.2806
Farm/Kidding Year Interaction	129	-26.5709	3.4657	-7.6668	< 0,0001	-33.3638	-19.7781
Farm/Kidding Year Interaction	130	-26.8494	5.1321	-5.2316	< 0,0001	-36.9085	-16.7903
Farm/Kidding Year Interaction	131	-6.8126	3.415	-1.9949	0.0461	-13.5061	-0.1191
Farm/Kidding Year Interaction	132	2.771	2.6716	1.0372	0.2996	-2.4653	8.0073
Farm/Kidding Year Interaction	133	-0.137	2.1034	-0.0651	0.9481	-4.2598	3.9857
Farm/Kidding Year Interaction	134	2.5773	10.9533	0.2353	0.814	-18.8913	24.046
Farm/Kidding Year Interaction	135	-4.8732	2.6525	-1.8372	0.0662	-10.0721	0.3258
Farm/Kidding Year Interaction	136	-10.9449	5.2013	-2.1043	0.0354	-21.1396	-0.7503
Farm/Kidding Year Interaction	137	-2.6818	3.1294	-0.857	0.3915	-8.8154	3.4519
Farm/Kidding Year Interaction	138	-12.6777	2.319	-5.4669	< 0,0001	-17.223	-8.1324
Farm/Kidding Year Interaction	139	-17.4667	3.5517	-4.9179	< 0,0001	-24.428	-10.5054
Farm/Kidding Year Interaction	140	-4.1158	2.8198	-1.4596	0.1444	-9.6427	1.4111
Farm/Kidding Year Interaction	141	-10.8775	9.6633	-1.1257	0.2603	-29.8177	8.0627
Farm/Kidding Year Interaction	142	-2.6907	3.1916	-0.843	0.3992	-8.9463	3.565
Farm/Kidding Year Interaction	143	-11.8626	2.8601	-4.1476	< 0,0001	-17.4685	-6.2567
Farm/Kidding Year Interaction	144	-4.9374	4.2764	-1.1546	0.2483	-13.3193	3.4445
Farm/Kidding Year Interaction	145	-26.0324	5.9493	-4.3757	< 0,0001	-37.6933	-14.3716
Farm/Kidding Year Interaction	146	-8.2605	4.5837	-1.8022	0.0715	-17.2446	0.7236
Farm/Kidding Year Interaction	147	-5.1487	2.9093	-1.7697	0.0768	-10.8511	0.5536
Farm/Kidding Year Interaction	148	-1.7197	2.5796	-0.6667	0.505	-6.7758	3.3364
Farm/Kidding Year Interaction	149	-0.7873	2.7285	-0.2886	0.7729	-6.1352	4.5606
Farm/Kidding Year Interaction	150	4.6341	3.7831	1.2249	0.2206	-2.781	12.0491
Farm/Kidding Year Interaction	151	4.5353	2.5393	1.7861	0.0741	-0.4417	9.5123
Farm/Kidding Year Interaction	152	2.7525	2.8696	0.9592	0.3375	-2.8718	8.3769
Farm/Kidding Year Interaction	153	2.7107	2.0603	1.3157	0.1883	-1.3275	6.7488
Farm/Kidding Year Interaction	154	1.8634	6.9217	0.2692	0.7878	-11.7033	15.4301
Farm/Kidding Year Interaction	155	-0.377	4.0092	-0.094	0.9251	-8.2351	7.4811
Farm/Kidding Year Interaction	156	8.6839	1.4864	5.8423	< 0,0001	5.7706	11.5972
Farm/Kidding Year Interaction	157	-9.89	4.5957	-2.152	0.0314	-18.8977	-0.8822
Farm/Kidding Year Interaction	158	-3.585	3.7823	-0.9478	0.3432	-10.9984	3.8284
Farm/Kidding Year Interaction	159	1.7276	5.4647	0.3161	0.7519	-8.9833	12.4384
Farm/Kidding Year Interaction	160	-6.7646	4.5309	-1.493	0.1354	-15.6453	2.1161
Farm/Kidding Year Interaction	161	-12.9409	7.0429	-1.8374	0.0662	-26.7452	0.8634
Farm/Kidding Year Interaction	162	-10.9577	2.5081	-4.3689	< 0,0001	-15.8737	-6.0417
Farm/Kidding Year Interaction	163	-16.604	4.1565	-3.9947	< 0,0001	-24.7508	-8.4571
Farm/Kidding Year Interaction	164	-27.4604	9.7336	-2.8212	0.0048	-46.5384	-8.3823
Farm/Kidding Year Interaction	165	-1.1238	2.6666	-0.4214	0.6734	-6.3503	4.1028
Farm/Kidding Year Interaction	166	-0.886	2.6601	-0.3331	0.7391	-6.0999	4.328
Farm/Kidding Year Interaction	167	-4.697	2.7108	-1.7327	0.0832	-10.0103	0.6163
Farm/Kidding Year Interaction	168	10.8773	3.972	2.7385	0.0062	3.0921	18.6625
Farm/Kidding Year Interaction	169	9.9289	3.9817	2.4936	0.0126	2.1247	17.733
Farm/Kidding Year Interaction	170	-9.4483	3.9787	-2.3747	0.0176	-17.2466	-1.65
Farm/Kidding Year Interaction	171	-8.2762	4.1661	-1.9865	0.047	-16.442	-0.1105
Farm/Kidding Year Interaction	172	-10.64	2.5384	-4.1915	< 0,0001	-15.6154	-5.6646
Farm/Kidding Year Interaction	173	-10.7392	2.7461	-3.9106	< 0,0001	-16.1217	-5.3567
Farm/Kidding Year Interaction	174	1.3666	3.942	0.3467	0.7288	-6.3598	9.093
Farm/Kidding Year Interaction	175	-2.7903	2.5587	-1.0905	0.2755	-7.8054	2.2248
Farm/Kidding Year Interaction	176	-8.1932	2.7636	-2.9647	0.003	-13.6098	-2.7765
Farm/Kidding Year Interaction	177	1.7391	3.0692	0.5666	0.571	-4.2765	7.7547
Farm/Kidding Year Interaction	178	0.5701	2.5621	0.2225	0.8239	-4.4517	5.5919
Farm/Kidding Year Interaction	179	-1.9597	1.9677	-0.996	0.3193	-5.8165	1.897
Farm/Kidding Year Interaction	180	-27.6928	5.2261	-5.2989	< 0,0001	-37.9362	-17.4495
Farm/Kidding Year Interaction	181	-10.9365	9.6017	-1.139	0.2547	-29.756	7.8831
Farm/Kidding Year Interaction	182	-1.5576	10.4065	-0.1497	0.881	-21.9546	18.8394
Farm/Kidding Year Interaction	183	-9.4166	4.4365	-2.1226	0.0338	-18.1122	-0.7211
Farm/Kidding Year Interaction	184	-16.465	6.2591	-2.6306	0.0085	-28.7329	-4.1971
Farm/Kidding Year Interaction	185	-0.0215	2.7246	-0.0079	0.9937	-5.3619	5.3189
Farm/Kidding Year Interaction	186	-11.3048	3.7913	-2.9818	0.0029	-18.7358	-3.8738
Farm/Kidding Year Interaction	187	22.8035	1.3573	16.8003	< 0,0001	20.1431	25.4639
Farm/Kidding Year Interaction	188	21.4361	1.6113	13.3038	< 0,0001	18.2779	24.5942
Farm/Kidding Year Interaction	189	-0.3316	2.9461	-0.1126	0.9104	-6.106	5.4428
Farm/Kidding Year Interaction	190	-3.7924	2.0729	-1.8295	0.0673	-7.8553	0.2705
Farm/Kidding Year Interaction	191	-13.5772	4.6398	-2.9262	0.0034	-22.6713	-4.4831
Farm/Kidding Year Interaction	192	-7.0874	2.7748	-2.5542	0.0106	-12.526	-1.6488
Farm/Kidding Year Interaction	193	-12.8156	2.6159	-4.8991	< 0,0001	-17.9429	-7.6884
Farm/Kidding Year Interaction	194	-15.3286	6.001	-2.5543	0.0106	-27.0907	-3.5665
Farm/Kidding Year Interaction	195	11.5427	3.42	3.3751	0.0007	4.8395	18.2459
Farm/Kidding Year Interaction	196	11.8705	3.8366	3.094	0.002	4.3506	19.3904
Farm/Kidding Year Interaction	197	-4.3661	1.9841	-2.2005	0.0278	-8.255	-0.4772
Farm/Kidding Year Interaction	198	-5.514	4.0213	-1.3712	0.1703	-13.3958	2.3678
Farm/Kidding Year Interaction	199	-7.6624	5.7918	-1.323	0.1858	-19.0145	3.6896
Farm/Kidding Year Interaction	200	-5.5145	2.3041	-2.3933	0.0167	-10.0306	-0.9984
Farm/Kidding Year Interaction	201	-5.5054	2.742	-2.0078	0.0447	-10.8798	-0.131
Farm/Kidding Year Interaction	202	6.8523	4.4147	1.5522	0.1206	-1.8006	15.5052
Farm/Kidding Year Interaction	203	9.8102	1.9482	5.0356	< 0,0001	5.9918	13.6287
Farm/Kidding Year Interaction	204	-7.6496	1.9391	-3.9449	< 0,0001	-11.4504	-3.8489
Farm/Kidding Year Interaction	205	3.4028	13.3716	0.2545	0.7991	-22.8059	29.6115
Farm/Kidding Year Interaction	206	-5.899	2.0306	-2.9051	0.0037	-9.879	-1.919
Farm/Kidding Year Interaction	207	11.4601	3.4379	3.3335	0.0009	4.7218	18.1985
Farm/Kidding Year Interaction	208	0	0
Farm/Kidding Year Interaction	209	0.4378	2.3579	0.1857	0.8527	-4.1838	5.0595
Farm/Kidding Year Interaction	210	0.4693	2.446	0.1919	0.8478	-4.3248	5.2635
Farm/Kidding Year Interaction	211	0.8764	4.8037	0.1825	0.8552	-8.5388	10.2917
Farm/Kidding Year Interaction	212	1.7001	2.0286	0.838	0.402	-2.2761	5.6762
Farm/Kidding Year Interaction	213	-0.5569	5.7442	-0.0969	0.9228	-11.8156	10.7018
Farm/Kidding Year Interaction	214	-2.7033	2.6614	-1.0158	0.3097	-7.9196	2.513
Farm/Kidding Year Interaction	215	1.367	6.0176	0.2272	0.8203	-10.4277	13.1617
Farm/Kidding Year Interaction	216	-22.4453	9.797	-2.291	0.022	-41.6477	-3.243
Farm/Kidding Year Interaction	217	-6.7914	2.7151	-2.5014	0.0124	-12.113	-1.4698
Farm/Kidding Year Interaction	218	-22.6604	9.7658	-2.3204	0.0203	-41.8016	-3.5192
Farm/Kidding Year Interaction	219	-16.116	2.4014	-6.711	< 0,0001	-20.8229	-11.4092
Farm/Kidding Year Interaction	220	-20.4607	4.7814	-4.2793	< 0,0001	-29.8322	-11.0891
Farm/Kidding Year Interaction	221	-8.5886	2.3937	-3.588	0.0003	-13.2804	-3.8968
Farm/Kidding Year Interaction	222	-17.7535	2.5492	-6.9645	< 0,0001	-22.7499	-12.7571
Farm/Kidding Year Interaction	223	-6.3426	2.6436	-2.3992	0.0164	-11.5242	-1.161
Farm/Kidding Year Interaction	224	-8.9655	2.1238	-4.2214	< 0,0001	-13.1283	-4.8028
Farm/Kidding Year Interaction	225	-10.664	1.9787	-5.3895	< 0,0001	-14.5422	-6.7857
Farm/Kidding Year Interaction	226	-11.7241	4.5216	-2.5929	0.0095	-20.5865	-2.8617
Farm/Kidding Year Interaction	227	-5.247	4.5886	-1.1435	0.2528	-14.2406	3.7467
Farm/Kidding Year Interaction	228	-21.958	4.0296	-5.4492	< 0,0001	-29.856	-14.0599
Farm/Kidding Year Interaction	229	-4.8165	2.5094	-1.9194	0.0549	-9.7351	0.102
Farm/Kidding Year Interaction	230	-20.2104	3.5034	-5.7687	< 0,0001	-27.0773	-13.3436
Farm/Kidding Year Interaction	231	-18.7828	2.398	-7.8326	< 0,0001	-23.4829	-14.0826
Farm/Kidding Year Interaction	232	-13.5919	2.6105	-5.2065	< 0,0001	-18.7086	-8.4752
Farm/Kidding Year Interaction	233	-12.9303	3.0942	-4.1788	< 0,0001	-18.9951	-6.8656
Farm/Kidding Year Interaction	234	-10.1646	1.9907	-5.106	< 0,0001	-14.0665	-6.2628
Farm/Kidding Year Interaction	235	-12.1879	4.7208	-2.5818	0.0098	-21.4407	-2.9351
Farm/Kidding Year Interaction	236	-9.6401	3.7845	-2.5473	0.0109	-17.0578	-2.2224
Farm/Kidding Year Interaction	237	-16.2513	3.4369	-4.7284	< 0,0001	-22.9878	-9.5148
Farm/Kidding Year Interaction	238	-18.3369	2.7714	-6.6165	< 0,0001	-23.7689	-12.9049
Farm/Kidding Year Interaction	239	-13.4664	2.7006	-4.9865	< 0,0001	-18.7595	-8.1732
Farm/Kidding Year Interaction	240	-5.0286	2.2526	-2.2323	0.0256	-9.4438	-0.6134
Farm/Kidding Year Interaction	241	-5.7916	2.6432	-2.1912	0.0284	-10.9723	-0.611
Farm/Kidding Year Interaction	242	-9.0587	1.8196	-4.9784	< 0,0001	-12.6252	-5.4923
Farm/Kidding Year Interaction	243	-12.9944	1.7462	-7.4417	< 0,0001	-16.417	-9.5719
Farm/Kidding Year Interaction	244	-15.6532	2.696	-5.8061	< 0,0001	-20.9373	-10.369
Farm/Kidding Year Interaction	245	-6.4989	2.107	-3.0844	0.002	-10.6287	-2.3691
Farm/Kidding Year Interaction	246	0	0
Farm/Kidding Year Interaction	247	-1.7746	1.8631	-0.9525	0.3409	-5.4262	1.8771
Farm/Kidding Year Interaction	248	-0.41	4.0706	-0.1007	0.9198	-8.3884	7.5684
Farm/Kidding Year Interaction	249	-22.1994	2.7759	-7.9973	< 0,0001	-27.6401	-16.7586
Farm/Kidding Year Interaction	250	-15.3116	2.5114	-6.0968	< 0,0001	-20.2341	-10.3892
Farm/Kidding Year Interaction	251	-8.6161	2.5001	-3.4463	0.0006	-13.5165	-3.7158
Farm/Kidding Year Interaction	252	-5.2622	3.1587	-1.6659	0.0957	-11.4533	0.9289
Farm/Kidding Year Interaction	253	0.0483	3.6215	0.0133	0.9894	-7.0499	7.1465
Farm/Kidding Year Interaction	254	-1.195	2.3144	-0.5164	0.6056	-5.7313	3.3412
Farm/Kidding Year Interaction	255	-9.7027	2.6476	-3.6648	0.0002	-14.892	-4.5135
Farm/Kidding Year Interaction	256	-13.5091	4.1704	-3.2392	0.0012	-21.6832	-5.3349
Farm/Kidding Year Interaction	257	-4.7902	2.4649	-1.9433	0.052	-9.6215	0.0411
Farm/Kidding Year Interaction	258	-12.0234	3.0408	-3.9541	< 0,0001	-17.9834	-6.0635
Farm/Kidding Year Interaction	259	-26.3082	5.9745	-4.4034	< 0,0001	-38.0183	-14.5981
Farm/Kidding Year Interaction	260	-30.0426	9.76	-3.0781	0.0021	-49.1724	-10.9128
Farm/Kidding Year Interaction	261	-10.2734	2.3089	-4.4494	< 0,0001	-14.799	-5.7479
Farm/Kidding Year Interaction	262	-15.9205	2.6164	-6.0849	< 0,0001	-21.0486	-10.7923
Farm/Kidding Year Interaction	263	-24.4074	4.826	-5.0575	< 0,0001	-33.8665	-14.9484
Farm/Kidding Year Interaction	264	-9.8374	2.9911	-3.2889	0.001	-15.7001	-3.9748
Farm/Kidding Year Interaction	265	-12.8087	5.5586	-2.3043	0.0212	-23.7037	-1.9137
Farm/Kidding Year Interaction	266	-8.3116	2.5266	-3.2896	0.001	-13.2638	-3.3594
Farm/Kidding Year Interaction	267	-15.0145	2.8014	-5.3596	< 0,0001	-20.5053	-9.5236
Farm/Kidding Year Interaction	268	-8.5098	2.7988	-3.0406	0.0024	-13.9954	-3.0242
Farm/Kidding Year Interaction	269	0.5933	2.7104	0.2189	0.8267	-4.7192	5.9058
Farm/Kidding Year Interaction	270	-3.8418	2.0276	-1.8947	0.0581	-7.816	0.1324
Farm/Kidding Year Interaction	271	-7.8869	1.9527	-4.039	< 0,0001	-11.7142	-4.0596
Farm/Kidding Year Interaction	272	-8.167	1.7768	-4.5965	< 0,0001	-11.6495	-4.6845
Farm/Kidding Year Interaction	273	5.4558	5.8554	0.9317	0.3515	-6.021	16.9326
Farm/Kidding Year Interaction	274	-18.4406	2.5327	-7.281	< 0,0001	-23.4048	-13.4765
Farm/Kidding Year Interaction	275	-14.4582	2.3449	-6.1658	< 0,0001	-19.0542	-9.8621
Farm/Kidding Year Interaction	276	-4.3993	2.5224	-1.7441	0.0812	-9.3432	0.5447
Farm/Kidding Year Interaction	277	5.8529	4.0203	1.4558	0.1454	-2.027	13.7328
Farm/Kidding Year Interaction	278	-1.9646	2.0762	-0.9462	0.344	-6.0341	2.1049
Farm/Kidding Year Interaction	279	-6.5157	2.0213	-3.2235	0.0013	-10.4775	-2.554
Farm/Kidding Year Interaction	280	-6.7254	5.7652	-1.1666	0.2434	-18.0254	4.5745
Farm/Kidding Year Interaction	281	-19.1784	9.6141	-1.9948	0.0461	-38.0223	-0.3345
Farm/Kidding Year Interaction	282	-16.7348	4.5412	-3.6851	0.0002	-25.6356	-7.8339
Farm/Kidding Year Interaction	283	-15.7693	4.5549	-3.4621	0.0005	-24.697	-6.8416
Farm/Kidding Year Interaction	284	-25.7767	8.0105	-3.2179	0.0013	-41.4774	-10.0761
Farm/Kidding Year Interaction	285	-8.4198	2.0921	-4.0246	< 0,0001	-12.5202	-4.3193
Farm/Kidding Year Interaction	286	-10.3325	3.011	-3.4316	0.0006	-16.2341	-4.4308
Farm/Kidding Year Interaction	287	-17.9715	4.3181	-4.1619	< 0,0001	-26.435	-9.508
Farm/Kidding Year Interaction	288	-10.154	4.0946	-2.4798	0.0131	-18.1795	-2.1284
Farm/Kidding Year Interaction	289	-9.9749	3.9966	-2.4959	0.0126	-17.8083	-2.1416
Farm/Kidding Year Interaction	290	-5.972	2.0725	-2.8815	0.004	-10.0342	-1.9098
Farm/Kidding Year Interaction	291	-14.6072	4.5861	-3.1851	0.0014	-23.5961	-5.6183
Farm/Kidding Year Interaction	292	-20.1028	3.7368	-5.3797	< 0,0001	-27.4269	-12.7786
Farm/Kidding Year Interaction	293	-15.299	2.6577	-5.7564	< 0,0001	-20.5082	-10.0898
Farm/Kidding Year Interaction	294	-13.6303	2.3452	-5.8121	< 0,0001	-18.2269	-9.0338
Farm/Kidding Year Interaction	295	-7.7356	2.8186	-2.7445	0.0061	-13.2602	-2.211
Farm/Kidding Year Interaction	296	-8.9348	2.8072	-3.1829	0.0015	-14.4369	-3.4327
Farm/Kidding Year Interaction	297	-16.5231	2.8543	-5.7887	< 0,0001	-22.1177	-10.9285
Farm/Kidding Year Interaction	298	-7.9723	3.5004	-2.2775	0.0228	-14.8333	-1.1114
Farm/Kidding Year Interaction	299	-7.5706	3.0225	-2.5047	0.0123	-13.4948	-1.6464
Farm/Kidding Year Interaction	300	4.4215	2.225	1.9872	0.0469	0.0604	8.7825
Farm/Kidding Year Interaction	301	-8.2515	2.831	-2.9147	0.0036	-13.8004	-2.7027
Farm/Kidding Year Interaction	302	-11.7271	2.7823	-4.2149	< 0,0001	-17.1805	-6.2737
Farm/Kidding Year Interaction	303	-11.8376	2.3419	-5.0546	< 0,0001	-16.4279	-7.2473
Farm/Kidding Year Interaction	304	-0.5035	1.9406	-0.2594	0.7953	-4.3071	3.3001
Farm/Kidding Year Interaction	305	-7.7697	3.3059	-2.3502	0.0188	-14.2494	-1.29
Farm/Kidding Year Interaction	306	-5.5779	1.7597	-3.1699	0.0015	-9.0269	-2.1289
Farm/Kidding Year Interaction	307	-14.1487	2.5476	-5.5538	< 0,0001	-19.142	-9.1554
Farm/Kidding Year Interaction	308	-5.9674	2.5128	-2.3748	0.0176	-10.8925	-1.0423
Farm/Kidding Year Interaction	309	-6.1343	2.0478	-2.9956	0.0027	-10.1479	-2.1206
Farm/Kidding Year Interaction	310	-14.4556	2.7703	-5.2181	< 0,0001	-19.8854	-9.0258
Farm/Kidding Year Interaction	311	10.4265	2.8103	3.7101	0.0002	4.9183	15.9348
Farm/Kidding Year Interaction	312	0.433	2.1864	0.198	0.843	-3.8525	4.7184
Farm/Kidding Year Interaction	313	-2.8074	3.1394	-0.8943	0.3712	-8.9608	3.3459
Farm/Kidding Year Interaction	314	-7.4036	2.3792	-3.1118	0.0019	-12.0668	-2.7404
Farm/Kidding Year Interaction	315	-10.338	2.4221	-4.2681	< 0,0001	-15.0855	-5.5906
Farm/Kidding Year Interaction	316	-5.6452	2.6863	-2.1015	0.0356	-10.9105	-0.38
Farm/Kidding Year Interaction	317	-8.8655	3.4471	-2.5719	0.0101	-15.6218	-2.1091
Farm/Kidding Year Interaction	318	-3.1678	3.4319	-0.923	0.356	-9.8944	3.5588
Farm/Kidding Year Interaction	319	-1.5478	3.1148	-0.4969	0.6193	-7.6528	4.5573
Farm/Kidding Year Interaction	320	-1.0129	3.1666	-0.3199	0.7491	-7.2194	5.1937
Farm/Kidding Year Interaction	321	-4.8699	4.8962	-0.9946	0.3199	-14.4666	4.7268
Farm/Kidding Year Interaction	322	7.0813	4.0488	1.749	0.0803	-0.8545	15.017
Farm/Kidding Year Interaction	323	-12.593	2.8283	-4.4525	< 0,0001	-18.1365	-7.0495
Farm/Kidding Year Interaction	324	0.8076	2.9542	0.2734	0.7846	-4.9828	6.5979
Farm/Kidding Year Interaction	325	-7.4038	2.0166	-3.6713	0.0002	-11.3565	-3.4511
Farm/Kidding Year Interaction	326	-11.2374	1.9769	-5.6844	< 0,0001	-15.1121	-7.3627
Farm/Kidding Year Interaction	327	-11.497	2.7311	-4.2096	< 0,0001	-16.85	-6.1439
Farm/Kidding Year Interaction	328	-15.8182	3.7808	-4.1838	< 0,0001	-23.2287	-8.4077
Farm/Kidding Year Interaction	329	-12.4813	2.5445	-4.9053	< 0,0001	-17.4685	-7.4941
Farm/Kidding Year Interaction	330	-7.4717	2.7588	-2.7083	0.0068	-12.8789	-2.0644
Farm/Kidding Year Interaction	331	-7.6913	2.0216	-3.8045	0.0001	-11.6537	-3.7288
Farm/Kidding Year Interaction	332	8.9786	5.8376	1.5381	0.124	-2.4633	20.4204
Farm/Kidding Year Interaction	333	-14.3875	2.6211	-5.4892	< 0,0001	-19.5249	-9.2502
Farm/Kidding Year Interaction	334	1.4839	1.9346	0.767	0.4431	-2.3079	5.2757
Farm/Kidding Year Interaction	335	3.913	1.6819	2.3265	0.02	0.6165	7.2096
Farm/Kidding Year Interaction	336	-11.3545	3.9804	-2.8526	0.0043	-19.1562	-3.5528
Farm/Kidding Year Interaction	337	-11.4466	2.4236	-4.723	< 0,0001	-16.1968	-6.6963
Farm/Kidding Year Interaction	338	-2.868	2.421	-1.1846	0.2362	-7.6133	1.8772
Farm/Kidding Year Interaction	339	-17.4472	3.711	-4.7015	< 0,0001	-24.7209	-10.1736
Farm/Kidding Year Interaction	340	-19.0458	4.6625	-4.0849	< 0,0001	-28.1844	-9.9072
Farm/Kidding Year Interaction	341	-5.6367	2.8008	-2.0125	0.0442	-11.1263	-0.147
Farm/Kidding Year Interaction	342	-11.8626	2.4386	-4.8645	< 0,0001	-16.6424	-7.0829
Farm/Kidding Year Interaction	343	-10.2424	3.0556	-3.352	0.0008	-16.2315	-4.2534
Farm/Kidding Year Interaction	344	-10.9306	4.392	-2.4888	0.0128	-19.5391	-2.3222
Farm/Kidding Year Interaction	345	-11.155	7.1649	-1.5569	0.1195	-25.1984	2.8884
Farm/Kidding Year Interaction	346	-10.7766	6.918	-1.5578	0.1193	-24.336	2.7827
Farm/Kidding Year Interaction	347	-7.4369	3.0703	-2.4222	0.0154	-13.4547	-1.4191
Farm/Kidding Year Interaction	348	-7.3817	3.8838	-1.9006	0.0574	-14.994	0.2307
Farm/Kidding Year Interaction	349	-10.5422	2.6593	-3.9643	< 0,0001	-15.7544	-5.3299
Farm/Kidding Year Interaction	350	-15.6991	3.8535	-4.074	< 0,0001	-23.252	-8.1462
Farm/Kidding Year Interaction	351	9.6426	3.5298	2.7317	0.0063	2.724	16.5611
Farm/Kidding Year Interaction	352	12.8817	6.7856	1.8984	0.0577	-0.4181	26.1816
Farm/Kidding Year Interaction	353	-0.6592	4.2412	-0.1554	0.8765	-8.9719	7.6536
Farm/Kidding Year Interaction	354	-17.5051	3.4633	-5.0544	< 0,0001	-24.2933	-10.7169
Farm/Kidding Year Interaction	355	-7.6858	3.6745	-2.0917	0.0365	-14.8878	-0.4837
Farm/Kidding Year Interaction	356	-8.7115	3.566	-2.4429	0.0146	-15.701	-1.722
Farm/Kidding Year Interaction	357	-4.7008	4.9815	-0.9437	0.3454	-14.4646	5.063
Farm/Kidding Year Interaction	358	-7.5367	2.0931	-3.6007	0.0003	-11.6392	-3.4342
Farm/Kidding Year Interaction	359	7.8091	6.7383	1.1589	0.2465	-5.3981	21.0164
Farm/Kidding Year Interaction	360	0	0
Farm/Kidding Year Interaction	361	-8.4685	1.7665	-4.7939	< 0,0001	-11.9309	-5.0061
Farm/Kidding Year Interaction	362	1.4544	3.521	0.4131	0.6796	-5.4469	8.3557
Farm/Kidding Year Interaction	363	3.173	3.8144	0.8318	0.4055	-4.3033	10.6493
Farm/Kidding Year Interaction	364	-12.165	2.665	-4.5648	< 0,0001	-17.3884	-6.9416
Farm/Kidding Year Interaction	365	-8.0037	2.0245	-3.9535	< 0,0001	-11.9717	-4.0357
Farm/Kidding Year Interaction	366	7.4165	5.8607	1.2655	0.2057	-4.0706	18.9037
Farm/Kidding Year Interaction	367	-16.8203	2.5659	-6.5553	< 0,0001	-21.8495	-11.7911
Farm/Kidding Year Interaction	368	-11.0272	2.7374	-4.0284	< 0,0001	-16.3925	-5.662
Farm/Kidding Year Interaction	369	-11.3038	1.993	-5.6716	< 0,0001	-15.2102	-7.3974
Farm/Kidding Year Interaction	370	-8.4721	4.7836	-1.7711	0.0766	-17.8481	0.9039
Farm/Kidding Year Interaction	371	-5.3302	2.5002	-2.1319	0.033	-10.2307	-0.4298
Farm/Kidding Year Interaction	372	-11.4684	4.6903	-2.4451	0.0145	-20.6615	-2.2753
Farm/Kidding Year Interaction	373	-8.6623	2.4338	-3.5591	0.0004	-13.4326	-3.8919
Farm/Kidding Year Interaction	374	-14.8889	2.6308	-5.6594	< 0,0001	-20.0454	-9.7324
Farm/Kidding Year Interaction	375	-10.9566	2.5459	-4.3036	< 0,0001	-15.9466	-5.9666
Farm/Kidding Year Interaction	376	-10.4321	3.0272	-3.4461	0.0006	-16.3655	-4.4987
Farm/Kidding Year Interaction	377	-14.9379	2.4036	-6.2148	< 0,0001	-19.649	-10.2267
Farm/Kidding Year Interaction	378	-13.8969	2.8037	-4.9566	< 0,0001	-19.3922	-8.4016
Farm/Kidding Year Interaction	379	-4.012	3.7778	-1.062	0.2883	-11.4166	3.3927
Farm/Kidding Year Interaction	380	0	0
Farm/Kidding Year Interaction	381	-20.2362	3.1094	-6.5082	< 0,0001	-26.3306	-14.1418
Farm/Kidding Year Interaction	382	-22.5738	3.9573	-5.7043	< 0,0001	-30.3302	-14.8174
Farm/Kidding Year Interaction	383	0	0
Farm/Kidding Year Interaction	384	2.1994	2.6656	0.8251	0.4093	-3.0252	7.4239
Farm/Kidding Year Interaction	385	-7.4829	4.1139	-1.8189	0.0689	-15.5463	0.5804
Farm/Kidding Year Interaction	386	7.0747	6.7748	1.0443	0.2964	-6.204	20.3534
Farm/Kidding Year Interaction	387	0	0
Farm/Kidding Year Interaction	388	-21.0438	6.9173	-3.0422	0.0024	-34.602	-7.4857
Farm/Kidding Year Interaction	389	-13.5808	2.4779	-5.4807	< 0,0001	-18.4375	-8.724
Farm/Kidding Year Interaction	390	-4.528	2.4373	-1.8578	0.0632	-9.3053	0.2492
Farm/Kidding Year Interaction	391	-3.9222	2.219	-1.7676	0.0771	-8.2714	0.427
Farm/Kidding Year Interaction	392	-13.139	10.4075	-1.2625	0.2068	-33.5379	7.2598
Farm/Kidding Year Interaction	393	-6.0872	3.0619	-1.9881	0.0468	-12.0886	-0.0858
Farm/Kidding Year Interaction	394	-11.8816	2.568	-4.6268	< 0,0001	-16.9149	-6.8483
Farm/Kidding Year Interaction	395	-11.5674	7.433	-1.5562	0.1197	-26.1362	3.0014
Farm/Kidding Year Interaction	396	0	0
Farm/Kidding Year Interaction	397	-9.1561	3.1705	-2.8879	0.0039	-15.3704	-2.9418
Farm/Kidding Year Interaction	398	-10.6449	6.8807	-1.5471	0.1219	-24.1311	2.8414
Farm/Kidding Year Interaction	399	-6.7262	7.4413	-0.9039	0.3661	-21.3113	7.859
Farm/Kidding Year Interaction	400	-8.1292	3.4706	-2.3423	0.0192	-14.9317	-1.3268
Farm/Kidding Year Interaction	401	-14.8843	5.1139	-2.9106	0.0036	-24.9076	-4.8609
Farm/Kidding Year Interaction	402	-1.8077	2.8477	-0.6348	0.5256	-7.3893	3.7738
Farm/Kidding Year Interaction	403	0	0
Farm/Kidding Year Interaction	404	-13.0832	2.6062	-5.0201	< 0,0001	-18.1914	-7.9751
Farm/Kidding Year Interaction	405	0	0
Farm/Kidding Year Interaction	406	0	0
Farm/Kidding Year Interaction	407	0	0
Farm/Kidding Year Interaction	408	0	0
Farm/Kidding Year Interaction	409	0	0
Farm/Kidding Year Interaction	410	0	0
Farm/Kidding Year Interaction	411	0	0
Farm/Kidding Year Interaction	412	0	0
Farm/Kidding Year Interaction	413	0	0
Farm/Kidding Year Interaction	414	0	0
Farm/Kidding Year Interaction	415	0	0
Farm/Kidding Year Interaction	416	0	0
Farm/Kidding Year Interaction	417	0	0
Farm/Kidding Year Interaction	418	0	0
Farm/Kidding Year Interaction	419	0	0
Farm/Kidding Year Interaction	420	0	0
Farm/Kidding Year Interaction	421	0	0
Farm/Kidding Year Interaction	422	0	0
Farm/Kidding Year Interaction	423	0	0
Farm/Kidding Year Interaction	424	0	0
Farm/Kidding Year Interaction	425	0	0
Farm/Kidding Year Interaction	426	0	0
Farm/Kidding Year Interaction	427	0	0
Farm/Kidding Year Interaction	428	0	0
Farm/Kidding Year Interaction	429	0	0
Farm/Kidding Year Interaction	430	0	0
Farm/Kidding Year Interaction	431	0	0
Farm/Kidding Year Interaction	432	0	0
Farm/Kidding Year Interaction	433	0	0
Farm/Kidding Year Interaction	434	0	0
Farm/Kidding Year Interaction	435	0	0
Farm/Kidding Year Interaction	436	0	0
Farm/Kidding Year Interaction	437	0	0
Farm/Kidding Year Interaction	438	0	0
Farm/Kidding Year Interaction	439	0	0
Farm/Kidding Year Interaction	440	0	0
Farm/Kidding Year Interaction	441	0	0
Farm/Kidding Year Interaction	442	0	0
Farm/Kidding Year Interaction	443	0	0
Farm/Kidding Year Interaction	444	0	0
Farm/Kidding Year Interaction	445	0	0
Farm/Kidding Year Interaction	446	0	0
Farm/Kidding Year Interaction	447	0	0
Farm/Kidding Year Interaction	448	0	0
Farm/Kidding Year Interaction	449	0	0
Farm/Kidding Year Interaction	450	0	0
Farm/Kidding Year Interaction	451	0	0
Farm/Kidding Year Interaction	452	0	0
Farm/Kidding Year Interaction	453	0	0
Farm/Kidding Year Interaction	454	0	0
Farm/Kidding Year Interaction	455	0	0
Farm/Kidding Year Interaction	456	0	0
Farm/Kidding Year Interaction	457	0	0
Farm/Kidding Year Interaction	458	0	0
Farm/Kidding Year Interaction	459	0	0
Farm/Kidding Year Interaction	460	0	0
Farm/Kidding Year Interaction	461	0	0
Farm/Kidding Year Interaction	462	0	0
Farm/Kidding Year Interaction	463	0	0
Farm/Kidding Year Interaction	464	0	0
Farm/Kidding Year Interaction	465	0	0
Farm/Kidding Year Interaction	466	0	0
Farm/Kidding Year Interaction	467	0	0
Farm/Kidding Year Interaction	468	0	0
Farm/Kidding Year Interaction	469	0	0
Farm/Kidding Year Interaction	470	0	0
Farm/Kidding Year Interaction	471	0	0
Farm/Kidding Year Interaction	472	0	0
Farm/Kidding Year Interaction	473	0	0
Farm/Kidding Year Interaction	474	0	0
Farm/Kidding Year Interaction	475	0	0
Farm/Kidding Year Interaction	476	0	0

## Sheet: Bone Quality
Parameter/Fixed Effect/Covariate	Level	Value	Standard error	t	Pr > |t|	Lower bound (95%)	Upper bound (95%)
Intercept	Intercept	3.3506	0.3301	10.1497	< 0,0001	2.7036	3.9977
Age (in years)	Age (in years)	-0.0181	0.0034	-5.3812	< 0,0001	-0.0247	-0.0115
Days in Milk	Days in Milk	-0.0009	0.0001	-13.6847	< 0,0001	-0.001	-0.0007
Farm	1	0.4149	0.3185	1.3028	0.1927	-0.2093	1.0392
Farm	2	0.2619	0.3456	0.758	0.4484	-0.4154	0.9393
Farm	3	0.9853	0.3572	2.7584	0.0058	0.2852	1.6855
Farm	4	-0.0869	0.319	-0.2723	0.7854	-0.7121	0.5384
Farm	5	0.5051	0.3324	1.5196	0.1286	-0.1464	1.1566
Farm	6	0.983	0.7662	1.2829	0.1995	-0.5188	2.4848
Farm	7	0.7735	0.3641	2.1246	0.0336	0.0599	1.4872
Farm	8	0.0316	0.3182	0.0993	0.9209	-0.5921	0.6553
Farm	9	0.5581	0.3212	1.7376	0.0823	-0.0714	1.1876
Farm	10	0.2518	0.3397	0.7412	0.4586	-0.4141	0.9176
Farm	11	1.3529	0.5787	2.338	0.0194	0.2187	2.4871
Farm	12	-0.1166	0.7574	-0.154	0.8776	-1.6011	1.3678
Farm	13	-0.7834	0.3247	-2.4124	0.0159	-1.4198	-0.1469
Farm	14	-0.0361	0.5789	-0.0623	0.9503	-1.1707	1.0986
Farm	15	0.1463	0.3855	0.3796	0.7042	-0.6092	0.9019
Farm	16	0.8367	0.3397	2.463	0.0138	0.1709	1.5025
Farm	17	0.583	0.59	0.988	0.3232	-0.5735	1.7395
Farm	18	0.173	0.341	0.5072	0.612	-0.4955	0.8414
Farm	19	0.1892	0.3859	0.4902	0.624	-0.5673	0.9457
Farm	20	0.0661	0.3852	0.1716	0.8638	-0.6889	0.8211
Farm	21	0.5365	0.3439	1.5599	0.1188	-0.1376	1.2106
Farm	22	0.8901	0.7574	1.1753	0.2399	-0.5943	2.3746
Farm	23	0.7936	0.3435	2.3106	0.0209	0.1204	1.4669
Farm	24	-0.0496	0.3423	-0.145	0.8847	-0.7205	0.6212
Farm	25	-0.466	0.3686	-1.2642	0.2062	-1.1885	0.2565
Farm	26	-0.1325	0.4191	-0.3162	0.7519	-0.9541	0.689
Farm	27	0.3162	0.5782	0.547	0.5844	-0.817	1.4495
Farm	28	-0.6966	0.4185	-1.6647	0.096	-1.5168	0.1236
Farm	29	-0.5762	0.3412	-1.6889	0.0913	-1.2448	0.0925
Farm	30	-0.6678	0.3407	-1.9601	0.05	-1.3356	0
Farm	31	0.0446	0.3686	0.121	0.9037	-0.6779	0.7671
Farm	32	-0.3831	0.3572	-1.0726	0.2835	-1.0833	0.317
Farm	33	-0.89	0.4642	-1.9173	0.0552	-1.7999	0.0198
Farm	34	0.6056	0.4049	1.4956	0.1348	-0.1881	1.3993
Farm	35	1.3567	0.5787	2.3444	0.0191	0.2224	2.4909
Farm	36	0.1734	0.3393	0.511	0.6093	-0.4917	0.8384
Farm	37	-0.0922	0.7574	-0.1217	0.9032	-1.5767	1.3924
Farm	38	0.3773	0.36	1.0481	0.2946	-0.3283	1.083
Farm	39	0.8835	0.7574	1.1666	0.2434	-0.6009	2.368
Farm	40	-0.6449	0.3331	-1.9361	0.0529	-1.2977	0.008
Farm	41	0.4815	0.3191	1.509	0.1313	-0.1439	1.1068
Farm	42	-1.0605	0.4775	-2.221	0.0264	-1.9964	-0.1246
Farm	43	0.0714	0.4374	0.1633	0.8703	-0.7858	0.9287
Farm	44	-0.1201	0.3397	-0.3537	0.7236	-0.786	0.5457
Farm	45	0.3307	0.3208	1.0309	0.3026	-0.298	0.9594
Farm	46	0.8738	0.5787	1.51	0.131	-0.2604	2.008
Farm	47	0.0108	0.3947	0.0274	0.9782	-0.7628	0.7844
Farm	48	-0.4625	0.3787	-1.2213	0.222	-1.2047	0.2798
Farm	49	-0.2229	0.3385	-0.6585	0.5102	-0.8865	0.4406
Farm	50	-0.2886	0.357	-0.8085	0.4188	-0.9884	0.4111
Farm	51	0.2837	0.3142	0.9029	0.3666	-0.3322	0.8996
Farm	52	-0.5663	0.4054	-1.397	0.1624	-1.3608	0.2282
Farm	53	0.7818	0.3793	2.0613	0.0393	0.0384	1.5252
Farm	54	1.0127	0.437	2.317	0.0205	0.156	1.8693
Farm	55	-0.0859	0.39	-0.2202	0.8257	-0.8502	0.6785
Farm	56	0.201	0.3426	0.5866	0.5575	-0.4705	0.8725
Farm	57	-0.9322	0.333	-2.7991	0.0051	-1.5849	-0.2794
Farm	58	-0.1363	0.7574	-0.18	0.8572	-1.6208	1.3481
Farm	59	0.3942	0.3375	1.168	0.2428	-0.2673	1.0557
Farm	60	0.2184	0.5052	0.4323	0.6655	-0.7719	1.2087
Farm	61	-0.4687	0.333	-1.4073	0.1593	-1.1215	0.1841
Farm	62	0.1292	0.3425	0.3773	0.7059	-0.542	0.8005
Farm	63	0.7483	0.5049	1.4819	0.1384	-0.2414	1.7379
Farm	64	0.6318	0.3943	1.6025	0.109	-0.141	1.4046
Farm	65	-0.35	0.3788	-0.9238	0.3556	-1.0925	0.3926
Farm	66	0.2523	0.3471	0.7268	0.4674	-0.4281	0.9327
Farm	67	0.4281	0.5788	0.7398	0.4594	-0.7062	1.5625
Farm	68	0.4698	0.3389	1.3863	0.1657	-0.1945	1.1341
Farm	69	-0.0815	0.7574	-0.1076	0.9143	-1.566	1.4031
Farm	70	0.0941	0.5176	0.1819	0.8557	-0.9203	1.1086
Farm	71	0.4097	0.4047	1.0124	0.3113	-0.3835	1.2029
Farm	72	0.12	0.4378	0.274	0.7841	-0.7381	0.9781
Farm	73	-0.3248	0.364	-0.8922	0.3723	-1.0382	0.3887
Farm	74	0.6495	0.4642	1.3992	0.1618	-0.2603	1.5594
Farm	75	0.9078	0.7574	1.1986	0.2307	-0.5767	2.3923
Farm	76	-0.0731	0.3274	-0.2232	0.8233	-0.7148	0.5687
Farm	77	0.882	0.7574	1.1646	0.2442	-0.6024	2.3665
Farm	78	0.9289	0.5896	1.5754	0.1152	-0.2268	2.0845
Farm	79	0.4207	0.3377	1.2459	0.2128	-0.2411	1.0825
Farm	80	0.8366	0.4207	1.9887	0.0467	0.0121	1.6611
Farm	81	0.3987	0.4642	0.8589	0.3904	-0.5112	1.3086
Farm	82	-0.2016	0.7661	-0.2632	0.7924	-1.7031	1.2999
Farm	83	-1.11	0.3339	-3.3248	0.0009	-1.7644	-0.4556
Farm	84	-0.5766	0.323	-1.7848	0.0743	-1.2097	0.0566
Farm	85	0.3628	0.3317	1.0937	0.2741	-0.2873	1.0128
Farm	86	0	0
Sex	Buck	-0.2437	0.1122	-2.1716	0.0299	-0.4636	-0.0237
Sex	Doe	0	0
Lactation Stage/Maturity	Primiparous	-0.0249	0.0112	-2.2267	0.026	-0.0468	-0.003
Lactation Stage/Maturity	Multiparous	0	0
Lactation Stage/Maturity	Buckling	0.0927	0.0411	2.2576	0.024	0.0122	0.1733
Lactation Stage/Maturity	Buck	0	0
Kidding Month	January	0.0765	0.0223	3.4252	0.0006	0.0327	0.1203
Kidding Month	February	0.1102	0.0226	4.8748	< 0,0001	0.0659	0.1546
Kidding Month	March	0.0722	0.0235	3.0773	0.0021	0.0262	0.1182
Kidding Month	April	0.0948	0.0229	4.144	< 0,0001	0.05	0.1396
Kidding Month	May	-0.0122	0.0243	-0.5017	0.6159	-0.0599	0.0355
Kidding Month	June	-0.0247	0.0253	-0.9733	0.3304	-0.0743	0.025
Kidding Month	July	-0.0906	0.0298	-3.0407	0.0024	-0.149	-0.0322
Kidding Month	August	0.0858	0.0239	3.5888	0.0003	0.039	0.1327
Kidding Month	September	0.1453	0.0245	5.9359	< 0,0001	0.0973	0.1933
Kidding Month	October	0.1458	0.0233	6.2538	< 0,0001	0.1001	0.1915
Kidding Month	November	0.046	0.0218	2.1046	0.0353	0.0032	0.0888
Kidding Month	December	0	0
Kidding Season	Winter	0	0
Kidding Season	Spring	0	0
Kidding Season	Summer	0	0
Kidding Season	Autumn	0	0
Farm/Kidding Year Interaction	1	-0.5688	0.3381	-1.6824	0.0925	-1.2314	0.0939
Farm/Kidding Year Interaction	2	-0.7408	0.2871	-2.5805	0.0099	-1.3035	-0.1781
Farm/Kidding Year Interaction	3	-0.7208	0.2696	-2.6738	0.0075	-1.2492	-0.1924
Farm/Kidding Year Interaction	4	0.4213	0.1592	2.6465	0.0081	0.1093	0.7334
Farm/Kidding Year Interaction	5	0.842	0.2587	3.2544	0.0011	0.3349	1.3491
Farm/Kidding Year Interaction	6	-0.772	0.5894	-1.3099	0.1902	-1.9272	0.3832
Farm/Kidding Year Interaction	7	-0.5247	0.6406	-0.819	0.4128	-1.7804	0.731
Farm/Kidding Year Interaction	8	1.2173	0.7092	1.7164	0.0861	-0.1728	2.6074
Farm/Kidding Year Interaction	9	1.4254	0.8615	1.6545	0.098	-0.2632	3.114
Farm/Kidding Year Interaction	10	0.243	0.1522	1.597	0.1103	-0.0552	0.5413
Farm/Kidding Year Interaction	11	0	0
Farm/Kidding Year Interaction	12	0.5317	0.2284	2.3276	0.0199	0.084	0.9794
Farm/Kidding Year Interaction	13	-0.1674	0.7065	-0.2369	0.8127	-1.5521	1.2174
Farm/Kidding Year Interaction	14	-0.8753	0.338	-2.5897	0.0096	-1.5378	-0.2128
Farm/Kidding Year Interaction	15	-0.184	0.7653	-0.2405	0.81	-1.6841	1.316
Farm/Kidding Year Interaction	16	0	0
Farm/Kidding Year Interaction	17	-0.3358	0.7049	-0.4764	0.6338	-1.7175	1.0459
Farm/Kidding Year Interaction	18	-0.3161	0.7211	-0.4383	0.6611	-1.7294	1.0972
Farm/Kidding Year Interaction	19	-0.5723	0.7547	-0.7583	0.4483	-2.0516	0.9069
Farm/Kidding Year Interaction	20	-0.1368	0.14	-0.9772	0.3285	-0.4111	0.1375
Farm/Kidding Year Interaction	21	-0.2776	0.2423	-1.1457	0.2519	-0.7526	0.1973
Farm/Kidding Year Interaction	22	-0.1902	0.1437	-1.3236	0.1856	-0.4719	0.0915
Farm/Kidding Year Interaction	23	-0.3101	0.7064	-0.439	0.6607	-1.6947	1.0745
Farm/Kidding Year Interaction	24	0.0763	0.209	0.3651	0.7151	-0.3334	0.486
Farm/Kidding Year Interaction	25	0.1243	0.192	0.6474	0.5174	-0.252	0.5006
Farm/Kidding Year Interaction	26	-0.0208	0.2195	-0.095	0.9243	-0.4511	0.4094
Farm/Kidding Year Interaction	27	-0.3198	0.4771	-0.6703	0.5026	-1.2549	0.6153
Farm/Kidding Year Interaction	28	0.2132	0.5255	0.4058	0.6849	-0.8167	1.2431
Farm/Kidding Year Interaction	29	0.3483	0.1605	2.17	0.03	0.0337	0.663
Farm/Kidding Year Interaction	30	0.4583	0.206	2.2244	0.0261	0.0545	0.8621
Farm/Kidding Year Interaction	31	0.2637	0.141	1.8711	0.0613	-0.0125	0.54
Farm/Kidding Year Interaction	32	0	0
Farm/Kidding Year Interaction	33	0.7524	0.189	3.9801	< 0,0001	0.3819	1.1229
Farm/Kidding Year Interaction	34	0.8479	0.5094	1.6646	0.096	-0.1505	1.8464
Farm/Kidding Year Interaction	35	0.242	0.1825	1.326	0.1848	-0.1157	0.5997
Farm/Kidding Year Interaction	36	0.1574	0.1881	0.837	0.4026	-0.2112	0.526
Farm/Kidding Year Interaction	37	1.5794	0.5192	3.042	0.0024	0.5618	2.597
Farm/Kidding Year Interaction	38	0.0367	0.1514	0.2422	0.8087	-0.2601	0.3334
Farm/Kidding Year Interaction	39	-0.2745	0.5093	-0.539	0.5899	-1.2728	0.7238
Farm/Kidding Year Interaction	40	-0.2143	0.174	-1.2317	0.2181	-0.5552	0.1267
Farm/Kidding Year Interaction	41	-0.317	0.2154	-1.4718	0.1411	-0.7392	0.1052
Farm/Kidding Year Interaction	42	-0.119	0.2615	-0.4551	0.649	-0.6315	0.3935
Farm/Kidding Year Interaction	43	-0.1996	0.5521	-0.3616	0.7176	-1.2817	0.8824
Farm/Kidding Year Interaction	44	0.2882	0.9778	0.2948	0.7681	-1.6282	2.2047
Farm/Kidding Year Interaction	45	-0.0629	0.1931	-0.3258	0.7446	-0.4415	0.3156
Farm/Kidding Year Interaction	46	-0.1825	0.5221	-0.3496	0.7267	-1.2058	0.8408
Farm/Kidding Year Interaction	47	0.2614	0.8465	0.3088	0.7575	-1.3978	1.9206
Farm/Kidding Year Interaction	48	-0.1583	0.1694	-0.9341	0.3502	-0.4903	0.1738
Farm/Kidding Year Interaction	49	-0.0987	0.2604	-0.3792	0.7046	-0.6091	0.4117
Farm/Kidding Year Interaction	50	-0.253	0.1991	-1.2704	0.2039	-0.6433	0.1373
Farm/Kidding Year Interaction	51	-0.2046	0.2012	-1.0169	0.3092	-0.5991	0.1898
Farm/Kidding Year Interaction	52	-0.4073	0.1487	-2.7391	0.0062	-0.6987	-0.1158
Farm/Kidding Year Interaction	53	0.5218	0.3843	1.3577	0.1746	-0.2315	1.2751
Farm/Kidding Year Interaction	54	-0.2059	0.1992	-1.0334	0.3014	-0.5963	0.1846
Farm/Kidding Year Interaction	55	-0.022	0.2134	-0.1032	0.9178	-0.4404	0.3963
Farm/Kidding Year Interaction	56	0	0
Farm/Kidding Year Interaction	57	-0.0306	0.1614	-0.1896	0.8496	-0.347	0.2858
Farm/Kidding Year Interaction	58	-0.3409	0.1801	-1.8925	0.0584	-0.694	0.0122
Farm/Kidding Year Interaction	59	-0.4414	0.2766	-1.5957	0.1106	-0.9835	0.1008
Farm/Kidding Year Interaction	60	0.0555	0.2272	0.2444	0.8069	-0.3898	0.5008
Farm/Kidding Year Interaction	61	0.5572	0.2203	2.529	0.0114	0.1254	0.989
Farm/Kidding Year Interaction	62	0.459	0.3771	1.2172	0.2235	-0.2801	1.1981
Farm/Kidding Year Interaction	63	-0.383	0.1472	-2.6022	0.0093	-0.6714	-0.0945
Farm/Kidding Year Interaction	64	0.0599	0.3175	0.1888	0.8503	-0.5624	0.6823
Farm/Kidding Year Interaction	65	-0.5981	0.3204	-1.8668	0.0619	-1.2261	0.0299
Farm/Kidding Year Interaction	66	-0.1169	0.1957	-0.5974	0.5503	-0.5006	0.2667
Farm/Kidding Year Interaction	67	0	0
Farm/Kidding Year Interaction	68	0.2835	0.161	1.7604	0.0783	-0.0321	0.5992
Farm/Kidding Year Interaction	69	-0.0797	0.1529	-0.5214	0.6021	-0.3795	0.22
Farm/Kidding Year Interaction	70	0.1657	0.5112	0.3241	0.7459	-0.8362	1.1676
Farm/Kidding Year Interaction	71	-0.3603	0.3684	-0.9779	0.3281	-1.0824	0.3618
Farm/Kidding Year Interaction	72	-0.0962	0.3719	-0.2586	0.7959	-0.8251	0.6327
Farm/Kidding Year Interaction	73	-0.3532	0.6095	-0.5795	0.5622	-1.5478	0.8414
Farm/Kidding Year Interaction	74	0.1606	0.2455	0.6544	0.5129	-0.3205	0.6417
Farm/Kidding Year Interaction	75	-0.3584	0.2348	-1.5266	0.1269	-0.8186	0.1018
Farm/Kidding Year Interaction	76	0.5186	0.3857	1.3446	0.1788	-0.2373	1.2745
Farm/Kidding Year Interaction	77	0	0
Farm/Kidding Year Interaction	78	0.1263	0.1723	0.733	0.4636	-0.2114	0.4639
Farm/Kidding Year Interaction	79	-0.2206	0.1484	-1.4865	0.1372	-0.5114	0.0703
Farm/Kidding Year Interaction	80	0.0262	0.4202	0.0622	0.9504	-0.7975	0.8499
Farm/Kidding Year Interaction	81	-0.0997	0.4179	-0.2385	0.8115	-0.9187	0.7194
Farm/Kidding Year Interaction	82	0.1573	0.807	0.195	0.8454	-1.4244	1.7391
Farm/Kidding Year Interaction	83	0.366	0.6435	0.5687	0.5696	-0.8954	1.6273
Farm/Kidding Year Interaction	84	-0.6949	0.1996	-3.4819	0.0005	-1.086	-0.3037
Farm/Kidding Year Interaction	85	-0.1674	0.194	-0.8627	0.3883	-0.5477	0.2129
Farm/Kidding Year Interaction	86	0	0
Farm/Kidding Year Interaction	87	-0.7512	0.708	-1.0609	0.2887	-2.139	0.6366
Farm/Kidding Year Interaction	88	-0.8238	0.7259	-1.1348	0.2564	-2.2467	0.599
Farm/Kidding Year Interaction	89	-0.476	0.2603	-1.8286	0.0675	-0.9862	0.0342
Farm/Kidding Year Interaction	90	0.0525	0.1965	0.2673	0.7893	-0.3327	0.4378
Farm/Kidding Year Interaction	91	0.1952	0.1972	0.9896	0.3224	-0.1914	0.5817
Farm/Kidding Year Interaction	92	0.2586	0.1349	1.9165	0.0553	-0.0059	0.5231
Farm/Kidding Year Interaction	93	-0.1981	0.1288	-1.5378	0.1241	-0.4505	0.0544
Farm/Kidding Year Interaction	94	1.2143	0.7049	1.7225	0.085	-0.1674	2.596
Farm/Kidding Year Interaction	95	-0.044	0.506	-0.0869	0.9308	-1.0357	0.9478
Farm/Kidding Year Interaction	96	0.7293	0.7657	0.9524	0.3409	-0.7715	2.23
Farm/Kidding Year Interaction	97	-0.3312	0.4602	-0.7198	0.4717	-1.2332	0.5707
Farm/Kidding Year Interaction	98	-0.0915	0.2459	-0.3719	0.7099	-0.5735	0.3906
Farm/Kidding Year Interaction	99	-1.1951	0.2725	-4.3864	< 0,0001	-1.7291	-0.6611
Farm/Kidding Year Interaction	100	-0.9534	0.2721	-3.5037	0.0005	-1.4867	-0.42
Farm/Kidding Year Interaction	101	-0.0727	0.1945	-0.3739	0.7085	-0.4539	0.3085
Farm/Kidding Year Interaction	102	-0.3255	0.3671	-0.8866	0.3753	-1.045	0.394
Farm/Kidding Year Interaction	103	-0.2616	0.376	-0.6958	0.4865	-0.9986	0.4753
Farm/Kidding Year Interaction	104	0.5428	0.7814	0.6947	0.4873	-0.9888	2.0744
Farm/Kidding Year Interaction	105	-0.558	0.1504	-3.71	0.0002	-0.8528	-0.2632
Farm/Kidding Year Interaction	106	-0.5551	0.1478	-3.7552	0.0002	-0.8449	-0.2654
Farm/Kidding Year Interaction	107	0.128	0.7086	0.1806	0.8567	-1.2609	1.5169
Farm/Kidding Year Interaction	108	-0.7406	0.4249	-1.743	0.0813	-1.5734	0.0922
Farm/Kidding Year Interaction	109	0.2031	0.1605	1.2653	0.2058	-0.1115	0.5177
Farm/Kidding Year Interaction	110	-0.028	0.14	-0.2	0.8415	-0.3024	0.2464
Farm/Kidding Year Interaction	111	0.8655	0.4236	2.0432	0.041	0.0352	1.6958
Farm/Kidding Year Interaction	112	-0.7128	0.1941	-3.6713	0.0002	-1.0933	-0.3322
Farm/Kidding Year Interaction	113	-0.4473	0.3574	-1.2516	0.2107	-1.1477	0.2531
Farm/Kidding Year Interaction	114	-0.6212	0.1728	-3.5949	0.0003	-0.9599	-0.2825
Farm/Kidding Year Interaction	115	-0.4994	0.2962	-1.6861	0.0918	-1.0799	0.0811
Farm/Kidding Year Interaction	116	0.032	0.702	0.0456	0.9636	-1.344	1.4079
Farm/Kidding Year Interaction	117	1.0505	0.9838	1.0678	0.2856	-0.8777	2.9787
Farm/Kidding Year Interaction	118	0.1037	0.2165	0.4789	0.632	-0.3207	0.5281
Farm/Kidding Year Interaction	119	0.272	0.2476	1.0989	0.2718	-0.2132	0.7572
Farm/Kidding Year Interaction	120	-0.2461	0.3149	-0.7814	0.4346	-0.8634	0.3712
Farm/Kidding Year Interaction	121	1.0754	0.3667	2.9331	0.0034	0.3568	1.7941
Farm/Kidding Year Interaction	122	-0.2771	0.3099	-0.8945	0.3711	-0.8845	0.3302
Farm/Kidding Year Interaction	123	0.0959	0.3322	0.2886	0.7729	-0.5552	0.7469
Farm/Kidding Year Interaction	124	1.0267	0.3545	2.8958	0.0038	0.3318	1.7216
Farm/Kidding Year Interaction	125	0.5623	0.5862	0.9591	0.3375	-0.5867	1.7112
Farm/Kidding Year Interaction	126	0.3502	0.3105	1.1279	0.2594	-0.2584	0.9588
Farm/Kidding Year Interaction	127	-1.123	0.2846	-3.9451	< 0,0001	-1.6809	-0.565
Farm/Kidding Year Interaction	128	0.1593	0.7029	0.2267	0.8207	-1.2185	1.5371
Farm/Kidding Year Interaction	129	-0.1037	0.255	-0.4068	0.6842	-0.6035	0.396
Farm/Kidding Year Interaction	130	-0.4584	0.3776	-1.2142	0.2247	-1.1985	0.2816
Farm/Kidding Year Interaction	131	-0.1852	0.2512	-0.7371	0.4611	-0.6776	0.3073
Farm/Kidding Year Interaction	132	-0.4679	0.1965	-2.3805	0.0173	-0.8531	-0.0826
Farm/Kidding Year Interaction	133	-0.1156	0.1547	-0.7472	0.455	-0.4189	0.1877
Farm/Kidding Year Interaction	134	-0.4355	0.8058	-0.5405	0.5889	-2.015	1.1439
Farm/Kidding Year Interaction	135	-0.2961	0.1951	-1.5175	0.1291	-0.6786	0.0864
Farm/Kidding Year Interaction	136	-0.4161	0.3827	-1.0875	0.2768	-1.1662	0.3339
Farm/Kidding Year Interaction	137	-0.1481	0.2302	-0.6432	0.5201	-0.5993	0.3032
Farm/Kidding Year Interaction	138	-0.3677	0.1706	-2.1552	0.0312	-0.7021	-0.0333
Farm/Kidding Year Interaction	139	0.2907	0.2613	1.1125	0.2659	-0.2214	0.8028
Farm/Kidding Year Interaction	140	-0.1264	0.2075	-0.6091	0.5425	-0.533	0.2803
Farm/Kidding Year Interaction	141	-0.6233	0.7109	-0.8767	0.3806	-2.0167	0.7701
Farm/Kidding Year Interaction	142	-0.6713	0.2348	-2.8587	0.0043	-1.1315	-0.211
Farm/Kidding Year Interaction	143	-0.2884	0.2104	-1.3705	0.1705	-0.7008	0.124
Farm/Kidding Year Interaction	144	-0.0218	0.3146	-0.0693	0.9448	-0.6384	0.5949
Farm/Kidding Year Interaction	145	0.3337	0.4377	0.7625	0.4458	-0.5241	1.1916
Farm/Kidding Year Interaction	146	-0.9495	0.3372	-2.8156	0.0049	-1.6105	-0.2885
Farm/Kidding Year Interaction	147	-0.1063	0.214	-0.4965	0.6196	-0.5258	0.3133
Farm/Kidding Year Interaction	148	-0.4988	0.1898	-2.6283	0.0086	-0.8708	-0.1268
Farm/Kidding Year Interaction	149	-0.2337	0.2007	-1.1642	0.2444	-0.6271	0.1598
Farm/Kidding Year Interaction	150	-0.3635	0.2783	-1.306	0.1915	-0.909	0.182
Farm/Kidding Year Interaction	151	-0.6725	0.1868	-3.5998	0.0003	-1.0387	-0.3063
Farm/Kidding Year Interaction	152	-0.6159	0.2111	-2.9172	0.0035	-1.0296	-0.2021
Farm/Kidding Year Interaction	153	-0.3305	0.1516	-2.1804	0.0292	-0.6276	-0.0334
Farm/Kidding Year Interaction	154	-0.3551	0.5092	-0.6973	0.4856	-1.3532	0.643
Farm/Kidding Year Interaction	155	-0.7099	0.295	-2.4067	0.0161	-1.288	-0.1317
Farm/Kidding Year Interaction	156	-0.2662	0.1094	-2.4339	0.0149	-0.4805	-0.0518
Farm/Kidding Year Interaction	157	-0.3824	0.3381	-1.1311	0.258	-1.0451	0.2803
Farm/Kidding Year Interaction	158	-0.3094	0.2783	-1.112	0.2661	-0.8548	0.236
Farm/Kidding Year Interaction	159	-0.4844	0.402	-1.2048	0.2283	-1.2724	0.3036
Farm/Kidding Year Interaction	160	-1.308	0.3333	-3.9239	< 0,0001	-1.9614	-0.6546
Farm/Kidding Year Interaction	161	-0.5918	0.5182	-1.1421	0.2534	-1.6074	0.4238
Farm/Kidding Year Interaction	162	-0.6202	0.1845	-3.3612	0.0008	-0.9819	-0.2585
Farm/Kidding Year Interaction	163	-0.2731	0.3058	-0.8932	0.3718	-0.8725	0.3262
Farm/Kidding Year Interaction	164	-0.102	0.7161	-0.1424	0.8867	-1.5056	1.3016
Farm/Kidding Year Interaction	165	-0.5295	0.1962	-2.6988	0.007	-0.914	-0.1449
Farm/Kidding Year Interaction	166	-0.379	0.1957	-1.9367	0.0528	-0.7626	0.0046
Farm/Kidding Year Interaction	167	0.0673	0.1994	0.3376	0.7357	-0.3236	0.4582
Farm/Kidding Year Interaction	168	-0.5049	0.2922	-1.728	0.084	-1.0777	0.0678
Farm/Kidding Year Interaction	169	-0.5958	0.2929	-2.034	0.042	-1.17	-0.0217
Farm/Kidding Year Interaction	170	-1.343	0.2927	-4.5881	< 0,0001	-1.9167	-0.7693
Farm/Kidding Year Interaction	171	-1.825	0.3065	-5.9544	< 0,0001	-2.4258	-1.2243
Farm/Kidding Year Interaction	172	-0.6722	0.1868	-3.5995	0.0003	-1.0383	-0.3062
Farm/Kidding Year Interaction	173	-0.1241	0.202	-0.6143	0.539	-0.5201	0.2719
Farm/Kidding Year Interaction	174	-0.4239	0.29	-1.4617	0.1438	-0.9923	0.1445
Farm/Kidding Year Interaction	175	-0.714	0.1882	-3.7929	0.0001	-1.0829	-0.345
Farm/Kidding Year Interaction	176	-0.3691	0.2033	-1.8155	0.0695	-0.7676	0.0294
Farm/Kidding Year Interaction	177	-0.3335	0.2258	-1.4772	0.1396	-0.7761	0.109
Farm/Kidding Year Interaction	178	-0.449	0.1885	-2.3821	0.0172	-0.8185	-0.0796
Farm/Kidding Year Interaction	179	-0.0621	0.1448	-0.4292	0.6678	-0.3459	0.2216
Farm/Kidding Year Interaction	180	0.0766	0.3845	0.1992	0.8421	-0.677	0.8302
Farm/Kidding Year Interaction	181	-0.213	0.7064	-0.3015	0.763	-1.5975	1.1716
Farm/Kidding Year Interaction	182	-1.2882	0.7656	-1.6826	0.0925	-2.7888	0.2124
Farm/Kidding Year Interaction	183	-0.3948	0.3264	-1.2094	0.2265	-1.0345	0.245
Farm/Kidding Year Interaction	184	0.0582	0.4605	0.1263	0.8995	-0.8444	0.9607
Farm/Kidding Year Interaction	185	-0.2314	0.2005	-1.1543	0.2484	-0.6243	0.1615
Farm/Kidding Year Interaction	186	-0.0161	0.2789	-0.0576	0.9541	-0.5628	0.5306
Farm/Kidding Year Interaction	187	-0.4182	0.0999	-4.1875	< 0,0001	-0.6139	-0.2224
Farm/Kidding Year Interaction	188	-0.428	0.1185	-3.6104	0.0003	-0.6603	-0.1956
Farm/Kidding Year Interaction	189	-0.2492	0.2167	-1.1495	0.2503	-0.674	0.1757
Farm/Kidding Year Interaction	190	-0.8847	0.1525	-5.8009	< 0,0001	-1.1836	-0.5857
Farm/Kidding Year Interaction	191	-0.6896	0.3414	-2.0201	0.0434	-1.3586	-0.0205
Farm/Kidding Year Interaction	192	0.3524	0.2041	1.7261	0.0843	-0.0477	0.7525
Farm/Kidding Year Interaction	193	0.302	0.1925	1.5694	0.1166	-0.0752	0.6792
Farm/Kidding Year Interaction	194	1.1164	0.4415	2.5286	0.0115	0.251	1.9817
Farm/Kidding Year Interaction	195	-0.1027	0.2516	-0.4081	0.6832	-0.5958	0.3905
Farm/Kidding Year Interaction	196	0.0443	0.2823	0.157	0.8752	-0.5089	0.5976
Farm/Kidding Year Interaction	197	-0.1344	0.146	-0.9205	0.3573	-0.4205	0.1517
Farm/Kidding Year Interaction	198	-0.3541	0.2958	-1.1971	0.2313	-0.934	0.2257
Farm/Kidding Year Interaction	199	0.5565	0.4261	1.306	0.1915	-0.2787	1.3917
Farm/Kidding Year Interaction	200	-0.2728	0.1695	-1.6095	0.1075	-0.6051	0.0594
Farm/Kidding Year Interaction	201	-0.4908	0.2017	-2.433	0.015	-0.8862	-0.0954
Farm/Kidding Year Interaction	202	-0.9101	0.3248	-2.8022	0.0051	-1.5467	-0.2735
Farm/Kidding Year Interaction	203	-0.407	0.1433	-2.8395	0.0045	-0.6879	-0.1261
Farm/Kidding Year Interaction	204	-0.5751	0.1427	-4.031	< 0,0001	-0.8547	-0.2955
Farm/Kidding Year Interaction	205	-0.962	0.9838	-0.9779	0.3281	-2.8902	0.9661
Farm/Kidding Year Interaction	206	-0.148	0.1494	-0.9905	0.3219	-0.4408	0.1448
Farm/Kidding Year Interaction	207	-0.3233	0.2529	-1.2781	0.2012	-0.819	0.1725
Farm/Kidding Year Interaction	208	0	0
Farm/Kidding Year Interaction	209	-0.9341	0.1735	-5.3844	< 0,0001	-1.2741	-0.594
Farm/Kidding Year Interaction	210	-0.8871	0.18	-4.93	< 0,0001	-1.2399	-0.5344
Farm/Kidding Year Interaction	211	-0.4317	0.3534	-1.2217	0.2218	-1.1244	0.2609
Farm/Kidding Year Interaction	212	0.9955	0.1492	6.6701	< 0,0001	0.703	1.288
Farm/Kidding Year Interaction	213	0.9273	0.4226	2.1942	0.0282	0.099	1.7556
Farm/Kidding Year Interaction	214	0.7377	0.1958	3.7677	0.0002	0.3539	1.1215
Farm/Kidding Year Interaction	215	0.1367	0.4427	0.3088	0.7575	-0.731	1.0045
Farm/Kidding Year Interaction	216	1.3408	0.7208	1.8603	0.0629	-0.0719	2.7536
Farm/Kidding Year Interaction	217	-0.1893	0.1997	-0.9476	0.3434	-0.5808	0.2022
Farm/Kidding Year Interaction	218	1.7613	0.7185	2.4514	0.0142	0.3531	3.1695
Farm/Kidding Year Interaction	219	0.3257	0.1767	1.8437	0.0652	-0.0206	0.672
Farm/Kidding Year Interaction	220	1.1233	0.3518	3.1934	0.0014	0.4339	1.8128
Farm/Kidding Year Interaction	221	0.5427	0.1761	3.0817	0.0021	0.1975	0.8879
Farm/Kidding Year Interaction	222	-0.4526	0.1875	-2.4134	0.0158	-0.8202	-0.085
Farm/Kidding Year Interaction	223	-0.9028	0.1945	-4.642	< 0,0001	-1.284	-0.5216
Farm/Kidding Year Interaction	224	0.1192	0.1562	0.7631	0.4454	-0.187	0.4255
Farm/Kidding Year Interaction	225	0.2895	0.1456	1.9887	0.0467	0.0042	0.5748
Farm/Kidding Year Interaction	226	-0.8215	0.3327	-2.4695	0.0135	-1.4735	-0.1695
Farm/Kidding Year Interaction	227	-0.1041	0.3376	-0.3082	0.7579	-0.7657	0.5576
Farm/Kidding Year Interaction	228	-0.9032	0.2965	-3.0467	0.0023	-1.4843	-0.3221
Farm/Kidding Year Interaction	229	-0.098	0.1846	-0.5309	0.5955	-0.4599	0.2638
Farm/Kidding Year Interaction	230	-0.2356	0.2577	-0.914	0.3607	-0.7408	0.2696
Farm/Kidding Year Interaction	231	0.2122	0.1764	1.2029	0.229	-0.1336	0.558
Farm/Kidding Year Interaction	232	-0.2435	0.1921	-1.2679	0.2048	-0.62	0.1329
Farm/Kidding Year Interaction	233	0.4952	0.2276	2.1755	0.0296	0.0491	0.9414
Farm/Kidding Year Interaction	234	-0.1252	0.1465	-0.8547	0.3927	-0.4122	0.1619
Farm/Kidding Year Interaction	235	-0.7509	0.3473	-2.1621	0.0306	-1.4316	-0.0702
Farm/Kidding Year Interaction	236	0.55	0.2784	1.9754	0.0482	0.0043	1.0957
Farm/Kidding Year Interaction	237	0.1677	0.2529	0.6632	0.5072	-0.3279	0.6633
Farm/Kidding Year Interaction	238	0.2748	0.2039	1.3478	0.1777	-0.1248	0.6744
Farm/Kidding Year Interaction	239	0.7134	0.1987	3.5905	0.0003	0.3239	1.1028
Farm/Kidding Year Interaction	240	0.231	0.1657	1.3938	0.1634	-0.0938	0.5558
Farm/Kidding Year Interaction	241	-0.0221	0.1945	-0.1138	0.9094	-0.4033	0.359
Farm/Kidding Year Interaction	242	0.6483	0.1339	4.8429	< 0,0001	0.3859	0.9107
Farm/Kidding Year Interaction	243	0.3697	0.1285	2.8779	0.004	0.1179	0.6215
Farm/Kidding Year Interaction	244	-0.0619	0.1983	-0.312	0.755	-0.4506	0.3269
Farm/Kidding Year Interaction	245	-0.1613	0.155	-1.0407	0.298	-0.4652	0.1425
Farm/Kidding Year Interaction	246	0	0
Farm/Kidding Year Interaction	247	0.0938	0.1371	0.6846	0.4936	-0.1748	0.3625
Farm/Kidding Year Interaction	248	-0.1387	0.2995	-0.4632	0.6432	-0.7257	0.4483
Farm/Kidding Year Interaction	249	0.6618	0.2042	3.2404	0.0012	0.2615	1.062
Farm/Kidding Year Interaction	250	-0.1445	0.1848	-0.7822	0.4341	-0.5067	0.2176
Farm/Kidding Year Interaction	251	-0.2085	0.1839	-1.1337	0.2569	-0.569	0.152
Farm/Kidding Year Interaction	252	-0.469	0.2324	-2.0182	0.0436	-0.9245	-0.0135
Farm/Kidding Year Interaction	253	0.4884	0.2664	1.8332	0.0668	-0.0338	1.0106
Farm/Kidding Year Interaction	254	-0.5658	0.1703	-3.3231	0.0009	-0.8995	-0.2321
Farm/Kidding Year Interaction	255	-0.1843	0.1948	-0.9461	0.3441	-0.5661	0.1975
Farm/Kidding Year Interaction	256	0.2279	0.3068	0.7426	0.4577	-0.3735	0.8292
Farm/Kidding Year Interaction	257	0.4301	0.1813	2.3719	0.0177	0.0747	0.7856
Farm/Kidding Year Interaction	258	0.6979	0.2237	3.1196	0.0018	0.2594	1.1364
Farm/Kidding Year Interaction	259	0.8888	0.4395	2.0221	0.0432	0.0273	1.7503
Farm/Kidding Year Interaction	260	2.0298	0.718	2.8268	0.0047	0.6224	3.4371
Farm/Kidding Year Interaction	261	-0.1378	0.1699	-0.8113	0.4172	-0.4708	0.1951
Farm/Kidding Year Interaction	262	-0.4197	0.1925	-2.1805	0.0292	-0.797	-0.0424
Farm/Kidding Year Interaction	263	0.175	0.355	0.493	0.622	-0.5209	0.8709
Farm/Kidding Year Interaction	264	-0.0209	0.2201	-0.095	0.9244	-0.4522	0.4104
Farm/Kidding Year Interaction	265	0.0399	0.4089	0.0975	0.9223	-0.7617	0.8414
Farm/Kidding Year Interaction	266	-1.1702	0.1859	-6.2953	< 0,0001	-1.5345	-0.8059
Farm/Kidding Year Interaction	267	0.0619	0.2061	0.3002	0.7641	-0.3421	0.4658
Farm/Kidding Year Interaction	268	-0.1947	0.2059	-0.9454	0.3445	-0.5982	0.2089
Farm/Kidding Year Interaction	269	-0.0707	0.1994	-0.3544	0.723	-0.4615	0.3202
Farm/Kidding Year Interaction	270	0.1827	0.1492	1.225	0.2206	-0.1096	0.4751
Farm/Kidding Year Interaction	271	-0.1667	0.1437	-1.1605	0.2459	-0.4483	0.1149
Farm/Kidding Year Interaction	272	0.2428	0.1307	1.8575	0.0632	-0.0134	0.499
Farm/Kidding Year Interaction	273	0.0078	0.4308	0.0181	0.9856	-0.8366	0.8521
Farm/Kidding Year Interaction	274	-0.2362	0.1863	-1.2677	0.2049	-0.6014	0.129
Farm/Kidding Year Interaction	275	0.3379	0.1725	1.9589	0.0501	-0.0002	0.6761
Farm/Kidding Year Interaction	276	0.0862	0.1856	0.4647	0.6421	-0.2775	0.45
Farm/Kidding Year Interaction	277	-0.0743	0.2958	-0.2513	0.8016	-0.6541	0.5054
Farm/Kidding Year Interaction	278	0.0178	0.1527	0.1168	0.907	-0.2816	0.3172
Farm/Kidding Year Interaction	279	-0.1683	0.1487	-1.1317	0.2578	-0.4598	0.1232
Farm/Kidding Year Interaction	280	0.1825	0.4241	0.4302	0.6671	-0.6489	1.0138
Farm/Kidding Year Interaction	281	0.8416	0.7073	1.1898	0.2341	-0.5448	2.2279
Farm/Kidding Year Interaction	282	-0.2618	0.3341	-0.7837	0.4332	-0.9167	0.393
Farm/Kidding Year Interaction	283	0.5075	0.3351	1.5146	0.1299	-0.1493	1.1644
Farm/Kidding Year Interaction	284	-0.5477	0.5893	-0.9293	0.3527	-1.7028	0.6074
Farm/Kidding Year Interaction	285	0.3371	0.1539	2.1904	0.0285	0.0355	0.6388
Farm/Kidding Year Interaction	286	-0.0503	0.2215	-0.227	0.8204	-0.4845	0.3839
Farm/Kidding Year Interaction	287	-0.5809	0.3177	-1.8286	0.0675	-1.2036	0.0417
Farm/Kidding Year Interaction	288	0.8191	0.3012	2.719	0.0066	0.2286	1.4095
Farm/Kidding Year Interaction	289	0.5933	0.294	2.0178	0.0436	0.017	1.1696
Farm/Kidding Year Interaction	290	0.2885	0.1525	1.8918	0.0585	-0.0104	0.5873
Farm/Kidding Year Interaction	291	-0.2181	0.3374	-0.6464	0.518	-0.8794	0.4432
Farm/Kidding Year Interaction	292	0.0417	0.2749	0.1516	0.8795	-0.4972	0.5805
Farm/Kidding Year Interaction	293	0.6313	0.1955	3.2284	0.0012	0.248	1.0145
Farm/Kidding Year Interaction	294	0.4571	0.1725	2.6496	0.0081	0.119	0.7953
Farm/Kidding Year Interaction	295	0.2812	0.2074	1.3562	0.175	-0.1252	0.6877
Farm/Kidding Year Interaction	296	0.0667	0.2065	0.3227	0.7469	-0.3381	0.4714
Farm/Kidding Year Interaction	297	0.2584	0.21	1.2305	0.2185	-0.1532	0.67
Farm/Kidding Year Interaction	298	0.3819	0.2575	1.4829	0.1381	-0.1229	0.8866
Farm/Kidding Year Interaction	299	0.4534	0.2224	2.039	0.0415	0.0176	0.8893
Farm/Kidding Year Interaction	300	-0.5208	0.1637	-3.1818	0.0015	-0.8417	-0.2
Farm/Kidding Year Interaction	301	-0.0089	0.2083	-0.0425	0.9661	-0.4171	0.3994
Farm/Kidding Year Interaction	302	0.323	0.2047	1.5782	0.1145	-0.0782	0.7243
Farm/Kidding Year Interaction	303	0.2813	0.1723	1.6326	0.1026	-0.0564	0.619
Farm/Kidding Year Interaction	304	0.3736	0.1428	2.6165	0.0089	0.0937	0.6534
Farm/Kidding Year Interaction	305	0.1073	0.2432	0.441	0.6592	-0.3695	0.584
Farm/Kidding Year Interaction	306	0.3377	0.1295	2.6089	0.0091	0.084	0.5915
Farm/Kidding Year Interaction	307	-0.3981	0.1874	-2.1242	0.0337	-0.7655	-0.0308
Farm/Kidding Year Interaction	308	-0.7673	0.1849	-4.1504	< 0,0001	-1.1296	-0.4049
Farm/Kidding Year Interaction	309	-0.0059	0.1507	-0.0389	0.969	-0.3011	0.2894
Farm/Kidding Year Interaction	310	-0.1675	0.2038	-0.822	0.4111	-0.567	0.2319
Farm/Kidding Year Interaction	311	0.3129	0.2068	1.5134	0.1302	-0.0923	0.7181
Farm/Kidding Year Interaction	312	-0.411	0.1609	-2.5551	0.0106	-0.7263	-0.0957
Farm/Kidding Year Interaction	313	0.9903	0.231	4.2877	< 0,0001	0.5376	1.443
Farm/Kidding Year Interaction	314	0.2113	0.175	1.207	0.2275	-0.1318	0.5543
Farm/Kidding Year Interaction	315	0.0241	0.1782	0.135	0.8926	-0.3252	0.3733
Farm/Kidding Year Interaction	316	-0.2661	0.1976	-1.3462	0.1782	-0.6534	0.1213
Farm/Kidding Year Interaction	317	-0.3093	0.2536	-1.2197	0.2226	-0.8064	0.1878
Farm/Kidding Year Interaction	318	-0.033	0.2525	-0.1309	0.8959	-0.5279	0.4618
Farm/Kidding Year Interaction	319	-0.4443	0.2292	-1.939	0.0525	-0.8935	0.0048
Farm/Kidding Year Interaction	320	0.2322	0.233	0.9965	0.319	-0.2245	0.6888
Farm/Kidding Year Interaction	321	-0.0517	0.3602	-0.1436	0.8858	-0.7577	0.6543
Farm/Kidding Year Interaction	322	0.0346	0.2979	0.1163	0.9074	-0.5492	0.6185
Farm/Kidding Year Interaction	323	0.6835	0.2081	3.285	0.001	0.2757	1.0914
Farm/Kidding Year Interaction	324	-0.501	0.2173	-2.305	0.0212	-0.927	-0.075
Farm/Kidding Year Interaction	325	0.4566	0.1484	3.0774	0.0021	0.1658	0.7474
Farm/Kidding Year Interaction	326	0.0414	0.1454	0.2844	0.7761	-0.2437	0.3264
Farm/Kidding Year Interaction	327	-0.3616	0.2009	-1.7998	0.0719	-0.7555	0.0322
Farm/Kidding Year Interaction	328	0.549	0.2782	1.9737	0.0484	0.0038	1.0942
Farm/Kidding Year Interaction	329	-0.3912	0.1872	-2.09	0.0366	-0.7582	-0.0243
Farm/Kidding Year Interaction	330	0.2412	0.203	1.1884	0.2347	-0.1566	0.639
Farm/Kidding Year Interaction	331	0.3657	0.1487	2.4585	0.014	0.0741	0.6572
Farm/Kidding Year Interaction	332	0.1446	0.4295	0.3367	0.7364	-0.6972	0.9864
Farm/Kidding Year Interaction	333	1.1596	0.1928	6.0133	< 0,0001	0.7816	1.5375
Farm/Kidding Year Interaction	334	0.5457	0.1423	3.8341	0.0001	0.2667	0.8247
Farm/Kidding Year Interaction	335	0.0957	0.1237	0.7732	0.4394	-0.1469	0.3382
Farm/Kidding Year Interaction	336	1.29	0.2928	4.4051	< 0,0001	0.716	1.864
Farm/Kidding Year Interaction	337	0.1876	0.1783	1.0522	0.2927	-0.1619	0.5371
Farm/Kidding Year Interaction	338	-0.6056	0.1781	-3.4001	0.0007	-0.9547	-0.2565
Farm/Kidding Year Interaction	339	0.8815	0.273	3.2286	0.0012	0.3463	1.4166
Farm/Kidding Year Interaction	340	1.445	0.343	4.2126	< 0,0001	0.7727	2.1173
Farm/Kidding Year Interaction	341	0.7108	0.2061	3.4497	0.0006	0.307	1.1147
Farm/Kidding Year Interaction	342	0.4492	0.1794	2.5037	0.0123	0.0975	0.8008
Farm/Kidding Year Interaction	343	0.5054	0.2248	2.2482	0.0246	0.0648	0.946
Farm/Kidding Year Interaction	344	0.7541	0.3231	2.3337	0.0196	0.1208	1.3874
Farm/Kidding Year Interaction	345	0.0182	0.5271	0.0345	0.9725	-1.015	1.0514
Farm/Kidding Year Interaction	346	-0.4845	0.509	-0.952	0.3411	-1.4821	0.513
Farm/Kidding Year Interaction	347	0.2122	0.2259	0.9394	0.3475	-0.2305	0.6549
Farm/Kidding Year Interaction	348	-0.2573	0.2857	-0.9004	0.3679	-0.8173	0.3028
Farm/Kidding Year Interaction	349	-0.1921	0.1956	-0.9819	0.3262	-0.5756	0.1914
Farm/Kidding Year Interaction	350	0.0657	0.2835	0.2318	0.8167	-0.49	0.6214
Farm/Kidding Year Interaction	351	-0.4799	0.2597	-1.8479	0.0646	-0.9889	0.0291
Farm/Kidding Year Interaction	352	-0.437	0.4992	-0.8754	0.3814	-1.4155	0.5415
Farm/Kidding Year Interaction	353	-0.6349	0.312	-2.0348	0.0419	-1.2465	-0.0233
Farm/Kidding Year Interaction	354	-0.1791	0.2548	-0.7028	0.4822	-0.6785	0.3203
Farm/Kidding Year Interaction	355	0.1712	0.2703	0.6331	0.5267	-0.3587	0.701
Farm/Kidding Year Interaction	356	0.2309	0.2624	0.8802	0.3788	-0.2833	0.7451
Farm/Kidding Year Interaction	357	-0.6716	0.3665	-1.8325	0.0669	-1.3899	0.0467
Farm/Kidding Year Interaction	358	-0.0552	0.154	-0.3584	0.7201	-0.357	0.2466
Farm/Kidding Year Interaction	359	-0.4696	0.4957	-0.9473	0.3435	-1.4413	0.5021
Farm/Kidding Year Interaction	360	0	0
Farm/Kidding Year Interaction	361	-0.148	0.13	-1.1387	0.2548	-0.4027	0.1067
Farm/Kidding Year Interaction	362	0.2474	0.259	0.955	0.3396	-0.2603	0.7551
Farm/Kidding Year Interaction	363	0.3106	0.2806	1.1068	0.2684	-0.2394	0.8606
Farm/Kidding Year Interaction	364	-0.5446	0.1961	-2.7776	0.0055	-0.9289	-0.1603
Farm/Kidding Year Interaction	365	-0.5126	0.1489	-3.4415	0.0006	-0.8045	-0.2207
Farm/Kidding Year Interaction	366	-0.5679	0.4312	-1.317	0.1878	-1.413	0.2772
Farm/Kidding Year Interaction	367	-0.8114	0.1888	-4.2984	< 0,0001	-1.1814	-0.4414
Farm/Kidding Year Interaction	368	-0.6145	0.2014	-3.0514	0.0023	-1.0092	-0.2198
Farm/Kidding Year Interaction	369	-0.6207	0.1466	-4.2333	< 0,0001	-0.9081	-0.3333
Farm/Kidding Year Interaction	370	-0.5796	0.3519	-1.647	0.0996	-1.2694	0.1102
Farm/Kidding Year Interaction	371	-1.1452	0.1839	-6.2261	< 0,0001	-1.5058	-0.7847
Farm/Kidding Year Interaction	372	-0.2189	0.3451	-0.6345	0.5258	-0.8953	0.4574
Farm/Kidding Year Interaction	373	0.3019	0.1791	1.6863	0.0918	-0.049	0.6529
Farm/Kidding Year Interaction	374	0.0821	0.1936	0.4243	0.6714	-0.2972	0.4615
Farm/Kidding Year Interaction	375	-0.4301	0.1873	-2.2962	0.0217	-0.7972	-0.063
Farm/Kidding Year Interaction	376	-0.4725	0.2227	-2.1214	0.0339	-0.909	-0.0359
Farm/Kidding Year Interaction	377	-0.1128	0.1768	-0.6379	0.5235	-0.4594	0.2338
Farm/Kidding Year Interaction	378	-0.4479	0.2063	-2.1715	0.0299	-0.8522	-0.0436
Farm/Kidding Year Interaction	379	-0.2275	0.2779	-0.8184	0.4131	-0.7722	0.3173
Farm/Kidding Year Interaction	380	0	0
Farm/Kidding Year Interaction	381	-0.6152	0.2288	-2.6894	0.0072	-1.0636	-0.1669
Farm/Kidding Year Interaction	382	-0.0602	0.2911	-0.2068	0.8362	-0.6309	0.5104
Farm/Kidding Year Interaction	383	0	0
Farm/Kidding Year Interaction	384	-0.7044	0.1961	-3.5922	0.0003	-1.0888	-0.3201
Farm/Kidding Year Interaction	385	-0.0617	0.3027	-0.2039	0.8384	-0.6549	0.5315
Farm/Kidding Year Interaction	386	0.037	0.4984	0.0742	0.9409	-0.9399	1.0139
Farm/Kidding Year Interaction	387	0	0
Farm/Kidding Year Interaction	388	0.3206	0.5089	0.63	0.5287	-0.6768	1.3181
Farm/Kidding Year Interaction	389	-0.5265	0.1823	-2.888	0.0039	-0.8838	-0.1692
Farm/Kidding Year Interaction	390	-0.4482	0.1793	-2.4995	0.0124	-0.7997	-0.0967
Farm/Kidding Year Interaction	391	-0.8772	0.1632	-5.3731	< 0,0001	-1.1971	-0.5572
Farm/Kidding Year Interaction	392	-0.1807	0.7657	-0.2359	0.8135	-1.6814	1.3201
Farm/Kidding Year Interaction	393	-0.202	0.2253	-0.8967	0.3699	-0.6435	0.2395
Farm/Kidding Year Interaction	394	-0.2365	0.1889	-1.2518	0.2106	-0.6068	0.1338
Farm/Kidding Year Interaction	395	-1.2953	0.5468	-2.3687	0.0179	-2.3671	-0.2235
Farm/Kidding Year Interaction	396	0	0
Farm/Kidding Year Interaction	397	-0.6108	0.2333	-2.6186	0.0088	-1.068	-0.1536
Farm/Kidding Year Interaction	398	-1.0192	0.5062	-2.0134	0.0441	-2.0114	-0.027
Farm/Kidding Year Interaction	399	-1.6133	0.5475	-2.947	0.0032	-2.6864	-0.5403
Farm/Kidding Year Interaction	400	-0.8916	0.2553	-3.4919	0.0005	-1.392	-0.3911
Farm/Kidding Year Interaction	401	-0.9962	0.3762	-2.6477	0.0081	-1.7336	-0.2587
Farm/Kidding Year Interaction	402	-0.7549	0.2095	-3.6033	0.0003	-1.1655	-0.3443
Farm/Kidding Year Interaction	403	0	0
Farm/Kidding Year Interaction	404	-0.8697	0.1917	-4.536	< 0,0001	-1.2455	-0.4939
Farm/Kidding Year Interaction	405	0	0
Farm/Kidding Year Interaction	406	0	0
Farm/Kidding Year Interaction	407	0	0
Farm/Kidding Year Interaction	408	0	0
Farm/Kidding Year Interaction	409	0	0
Farm/Kidding Year Interaction	410	0	0
Farm/Kidding Year Interaction	411	0	0
Farm/Kidding Year Interaction	412	0	0
Farm/Kidding Year Interaction	413	0	0
Farm/Kidding Year Interaction	414	0	0
Farm/Kidding Year Interaction	415	0	0
Farm/Kidding Year Interaction	416	0	0
Farm/Kidding Year Interaction	417	0	0
Farm/Kidding Year Interaction	418	0	0
Farm/Kidding Year Interaction	419	0	0
Farm/Kidding Year Interaction	420	0	0
Farm/Kidding Year Interaction	421	0	0
Farm/Kidding Year Interaction	422	0	0
Farm/Kidding Year Interaction	423	0	0
Farm/Kidding Year Interaction	424	0	0
Farm/Kidding Year Interaction	425	0	0
Farm/Kidding Year Interaction	426	0	0
Farm/Kidding Year Interaction	427	0	0
Farm/Kidding Year Interaction	428	0	0
Farm/Kidding Year Interaction	429	0	0
Farm/Kidding Year Interaction	430	0	0
Farm/Kidding Year Interaction	431	0	0
Farm/Kidding Year Interaction	432	0	0
Farm/Kidding Year Interaction	433	0	0
Farm/Kidding Year Interaction	434	0	0
Farm/Kidding Year Interaction	435	0	0
Farm/Kidding Year Interaction	436	0	0
Farm/Kidding Year Interaction	437	0	0
Farm/Kidding Year Interaction	438	0	0
Farm/Kidding Year Interaction	439	0	0
Farm/Kidding Year Interaction	440	0	0
Farm/Kidding Year Interaction	441	0	0
Farm/Kidding Year Interaction	442	0	0
Farm/Kidding Year Interaction	443	0	0
Farm/Kidding Year Interaction	444	0	0
Farm/Kidding Year Interaction	445	0	0
Farm/Kidding Year Interaction	446	0	0
Farm/Kidding Year Interaction	447	0	0
Farm/Kidding Year Interaction	448	0	0
Farm/Kidding Year Interaction	449	0	0
Farm/Kidding Year Interaction	450	0	0
Farm/Kidding Year Interaction	451	0	0
Farm/Kidding Year Interaction	452	0	0
Farm/Kidding Year Interaction	453	0	0
Farm/Kidding Year Interaction	454	0	0
Farm/Kidding Year Interaction	455	0	0
Farm/Kidding Year Interaction	456	0	0
Farm/Kidding Year Interaction	457	0	0
Farm/Kidding Year Interaction	458	0	0
Farm/Kidding Year Interaction	459	0	0
Farm/Kidding Year Interaction	460	0	0
Farm/Kidding Year Interaction	461	0	0
Farm/Kidding Year Interaction	462	0	0
Farm/Kidding Year Interaction	463	0	0
Farm/Kidding Year Interaction	464	0	0
Farm/Kidding Year Interaction	465	0	0
Farm/Kidding Year Interaction	466	0	0
Farm/Kidding Year Interaction	467	0	0
Farm/Kidding Year Interaction	468	0	0
Farm/Kidding Year Interaction	469	0	0
Farm/Kidding Year Interaction	470	0	0
Farm/Kidding Year Interaction	471	0	0
Farm/Kidding Year Interaction	472	0	0
Farm/Kidding Year Interaction	473	0	0
Farm/Kidding Year Interaction	474	0	0
Farm/Kidding Year Interaction	475	0	0
Farm/Kidding Year Interaction	476	0	0

## Sheet: Anterior Insertion
Parameter/Fixed Effect/Covariate	Level	Value	Standard error	t	Pr > |t|	Lower bound (95%)	Upper bound (95%)
Intercept	Intercept	2.5341	0.7404	3.4228	0.0006	1.083	3.9853
Age (in years)	Age (in years)	-0.05	0.0037	-13.6135	< 0,0001	-0.0572	-0.0428
Days in Milk	Days in Milk	0.0015	0.0001	21.8799	< 0,0001	0.0013	0.0016
Farm	1	0.2358	0.7422	0.3177	0.7507	-1.2189	1.6905
Farm	2	0.0957	0.7445	0.1286	0.8977	-1.3635	1.555
Farm	3	-0.0488	0.744	-0.0655	0.9477	-1.5071	1.4095
Farm	4	0.0317	0.7435	0.0426	0.966	-1.4257	1.489
Farm	5	-0.0734	0.7443	-0.0987	0.9214	-1.5322	1.3854
Farm	6	1.8885	1.047	1.8037	0.0713	-0.1637	3.9406
Farm	7	0.0796	0.7995	0.0996	0.9206	-1.4874	1.6467
Farm	8	0.0432	0.7412	0.0583	0.9535	-1.4095	1.4959
Farm	9	0.2904	0.7449	0.3899	0.6966	-1.1696	1.7505
Farm	10	-0.3008	0.7547	-0.3986	0.6902	-1.7801	1.1784
Farm	11	0	0
Farm	12	0	0
Farm	13	0.0914	0.7518	0.1215	0.9033	-1.3822	1.5649
Farm	14	-2.8615	1.0524	-2.719	0.0066	-4.9242	-0.7988
Farm	15	-0.0053	0.7761	-0.0069	0.9945	-1.5266	1.5159
Farm	16	0.2056	0.7416	0.2772	0.7816	-1.248	1.6591
Farm	17	-0.5333	0.9063	-0.5885	0.5562	-2.3096	1.243
Farm	18	0.1285	0.7477	0.1718	0.8636	-1.337	1.5939
Farm	19	0.7071	0.7519	0.9403	0.347	-0.7667	2.1808
Farm	20	0.1775	0.7702	0.2305	0.8177	-1.3321	1.6871
Farm	21	0.0656	0.7433	0.0882	0.9297	-1.3914	1.5225
Farm	22	0	0
Farm	23	0.2464	0.7472	0.3298	0.7416	-1.2182	1.711
Farm	24	0.1272	0.7466	0.1703	0.8648	-1.3362	1.5905
Farm	25	0.1866	0.7526	0.2479	0.8042	-1.2886	1.6618
Farm	26	0.8228	0.7502	1.0969	0.2727	-0.6475	2.2932
Farm	27	-0.0835	0.7762	-0.1076	0.9143	-1.6049	1.4379
Farm	28	-0.1102	0.7603	-0.1449	0.8848	-1.6004	1.3801
Farm	29	0.0583	0.7423	0.0786	0.9374	-1.3965	1.5132
Farm	30	0.0182	0.7458	0.0245	0.9805	-1.4436	1.4801
Farm	31	0.4863	0.7489	0.6494	0.5161	-0.9815	1.9541
Farm	32	0.1566	0.7437	0.2106	0.8332	-1.301	1.6142
Farm	33	-0.526	0.7522	-0.6992	0.4844	-2.0004	0.9485
Farm	34	0.0725	0.7515	0.0965	0.9231	-1.4004	1.5455
Farm	35	0.3485	0.7761	0.4491	0.6534	-1.1726	1.8696
Farm	36	0.0466	0.745	0.0625	0.9502	-1.4136	1.5068
Farm	37	0	0
Farm	38	0.2084	0.7457	0.2795	0.7799	-1.2532	1.67
Farm	39	0.0678	0.7518	0.0902	0.9281	-1.4058	1.5415
Farm	40	-0.5017	0.7443	-0.674	0.5003	-1.9605	0.9571
Farm	41	0.1079	0.742	0.1454	0.8844	-1.3464	1.5622
Farm	42	-0.4987	0.8274	-0.6027	0.5467	-2.1205	1.1231
Farm	43	0.1383	0.9064	0.1526	0.8787	-1.6382	1.9148
Farm	44	0.0139	0.7644	0.0182	0.9855	-1.4843	1.5122
Farm	45	0.1523	0.9063	0.1681	0.8665	-1.6241	1.9288
Farm	46	0	0
Farm	47	0	0
Farm	48	-0.0289	0.7539	-0.0383	0.9694	-1.5066	1.4488
Farm	49	-0.3804	1.0488	-0.3627	0.7168	-2.4361	1.6753
Farm	50	0.1878	0.7526	0.2495	0.803	-1.2874	1.6629
Farm	51	0.2473	0.7406	0.3338	0.7385	-1.2044	1.6989
Farm	52	-0.6121	0.7484	-0.818	0.4134	-2.079	0.8547
Farm	53	0.5007	0.7426	0.6741	0.5002	-0.9549	1.9563
Farm	54	0.5447	0.7441	0.7321	0.4641	-0.9137	2.0031
Farm	55	0.1041	0.7729	0.1347	0.8928	-1.4107	1.619
Farm	56	-0.2916	0.7473	-0.3901	0.6964	-1.7563	1.1732
Farm	57	-0.0814	0.7428	-0.1095	0.9128	-1.5374	1.3746
Farm	58	0.2455	0.747	0.3287	0.7424	-1.2185	1.7096
Farm	59	-0.051	0.7452	-0.0684	0.9454	-1.5116	1.4096
Farm	60	-1.6916	0.9079	-1.8633	0.0624	-3.4712	0.0879
Farm	61	-0.3174	0.7454	-0.4258	0.6703	-1.7784	1.1436
Farm	62	0.0849	0.7492	0.1134	0.9098	-1.3836	1.5534
Farm	63	0.1162	0.7497	0.155	0.8768	-1.3532	1.5857
Farm	64	0.4902	0.7426	0.6601	0.5092	-0.9654	1.9458
Farm	65	-0.407	0.7575	-0.5372	0.5911	-1.8917	1.0778
Farm	66	-0.3586	0.7492	-0.4787	0.6322	-1.827	1.1098
Farm	67	0	0
Farm	68	0.0989	0.7419	0.1333	0.8939	-1.3552	1.553
Farm	69	0.0167	0.7627	0.0219	0.9825	-1.4783	1.5117
Farm	70	0.8798	0.8546	1.0294	0.3033	-0.7953	2.5549
Farm	71	0.5442	0.7553	0.7206	0.4712	-0.9361	2.0246
Farm	72	0	0
Farm	73	0.4389	0.7582	0.5789	0.5627	-1.0472	1.9251
Farm	74	0.5688	0.7512	0.7571	0.449	-0.9037	2.0412
Farm	75	0.9085	1.0467	0.868	0.3854	-1.143	2.96
Farm	76	0.2992	0.741	0.4039	0.6863	-1.1531	1.7516
Farm	77	0	0
Farm	78	1.6256	0.9064	1.7936	0.0729	-0.1509	3.4021
Farm	79	0.3414	0.7489	0.4558	0.6485	-1.1266	1.8093
Farm	80	0.4635	0.7913	0.5858	0.558	-1.0874	2.0144
Farm	81	0.1505	0.7419	0.2028	0.8393	-1.3037	1.6046
Farm	82	0.051	1.0469	0.0487	0.9612	-2.0011	2.103
Farm	83	0.0215	0.7461	0.0289	0.977	-1.4409	1.484
Farm	84	-0.844	0.8275	-1.0199	0.3078	-2.4659	0.778
Farm	85	0.0765	0.7431	0.103	0.918	-1.3799	1.5329
Farm	86	0	0
Sex	Buck	0	0
Sex	Doe	0	0
Lactation Stage/Maturity	Primiparous	0.2468	0.012	20.4915	< 0,0001	0.2232	0.2704
Lactation Stage/Maturity	Multiparous	0	0
Lactation Stage/Maturity	Buckling	0	0
Lactation Stage/Maturity	Buck	0	0
Kidding Month	January	-0.0867	0.0239	-3.6254	0.0003	-0.1336	-0.0398
Kidding Month	February	-0.114	0.0242	-4.7079	< 0,0001	-0.1614	-0.0665
Kidding Month	March	-0.1129	0.0251	-4.4952	< 0,0001	-0.1622	-0.0637
Kidding Month	April	-0.1413	0.0245	-5.7695	< 0,0001	-0.1893	-0.0933
Kidding Month	May	-0.2049	0.026	-7.8703	< 0,0001	-0.256	-0.1539
Kidding Month	June	-0.2374	0.0271	-8.7526	< 0,0001	-0.2905	-0.1842
Kidding Month	July	-0.0832	0.0319	-2.6095	0.0091	-0.1457	-0.0207
Kidding Month	August	-0.125	0.0256	-4.8801	< 0,0001	-0.1751	-0.0748
Kidding Month	September	-0.1249	0.0262	-4.7653	< 0,0001	-0.1762	-0.0735
Kidding Month	October	-0.0594	0.025	-2.3791	0.0174	-0.1083	-0.0105
Kidding Month	November	-0.0606	0.0234	-2.5905	0.0096	-0.1064	-0.0147
Kidding Month	December	0	0
Kidding Season	Winter	0	0
Kidding Season	Spring	0	0
Kidding Season	Summer	0	0
Kidding Season	Autumn	0	0
Farm/Kidding Year Interaction	1	0.2941	0.5303	0.5547	0.5791	-0.7453	1.3335
Farm/Kidding Year Interaction	2	0.0939	0.2722	0.345	0.7301	-0.4396	0.6274
Farm/Kidding Year Interaction	3	0.3211	0.2504	1.2824	0.1997	-0.1696	0.8117
Farm/Kidding Year Interaction	4	0.2824	0.1431	1.9732	0.0485	0.0019	0.5629
Farm/Kidding Year Interaction	5	0.101	0.2607	0.3874	0.6984	-0.41	0.6121
Farm/Kidding Year Interaction	6	0.2176	0.9063	0.24	0.8103	-1.5588	1.9939
Farm/Kidding Year Interaction	7	2.7585	0.8634	3.1947	0.0014	1.0661	4.4508
Farm/Kidding Year Interaction	8	-0.9081	0.7533	-1.2054	0.2281	-2.3846	0.5685
Farm/Kidding Year Interaction	9	0	0
Farm/Kidding Year Interaction	10	0.5311	0.5265	1.0087	0.3131	-0.5009	1.5631
Farm/Kidding Year Interaction	11	0	0
Farm/Kidding Year Interaction	12	0.4359	0.5574	0.782	0.4342	-0.6567	1.5285
Farm/Kidding Year Interaction	13	-0.2651	0.9073	-0.2922	0.7701	-2.0434	1.5132
Farm/Kidding Year Interaction	14	0.1392	0.336	0.4142	0.6788	-0.5195	0.7978
Farm/Kidding Year Interaction	15	0.0662	0.3795	0.1745	0.8615	-0.6776	0.81
Farm/Kidding Year Interaction	16	0	0
Farm/Kidding Year Interaction	17	-0.1721	0.7426	-0.2318	0.8167	-1.6277	1.2835
Farm/Kidding Year Interaction	18	0	0
Farm/Kidding Year Interaction	19	-0.3104	0.7995	-0.3883	0.6978	-1.8774	1.2565
Farm/Kidding Year Interaction	20	-0.1533	0.0667	-2.2971	0.0216	-0.284	-0.0225
Farm/Kidding Year Interaction	21	-0.4784	0.2224	-2.151	0.0315	-0.9144	-0.0425
Farm/Kidding Year Interaction	22	-0.074	0.0667	-1.1088	0.2675	-0.2048	0.0568
Farm/Kidding Year Interaction	23	-0.7476	0.7471	-1.0007	0.317	-2.212	0.7168
Farm/Kidding Year Interaction	24	-0.1565	0.1754	-0.8925	0.3721	-0.5003	0.1872
Farm/Kidding Year Interaction	25	-0.0055	0.1251	-0.0438	0.9651	-0.2507	0.2398
Farm/Kidding Year Interaction	26	-0.2243	0.1697	-1.3221	0.1861	-0.5568	0.1082
Farm/Kidding Year Interaction	27	-1.2806	0.5107	-2.5074	0.0122	-2.2816	-0.2796
Farm/Kidding Year Interaction	28	-1.4653	0.5387	-2.7202	0.0065	-2.5211	-0.4095
Farm/Kidding Year Interaction	29	-0.3646	0.145	-2.5145	0.0119	-0.6489	-0.0804
Farm/Kidding Year Interaction	30	-0.3129	0.2001	-1.5635	0.1179	-0.7052	0.0794
Farm/Kidding Year Interaction	31	0.1905	0.0826	2.3055	0.0211	0.0285	0.3525
Farm/Kidding Year Interaction	32	0	0
Farm/Kidding Year Interaction	33	0.0185	0.1586	0.1165	0.9072	-0.2924	0.3294
Farm/Kidding Year Interaction	34	1.2846	0.5306	2.421	0.0155	0.2446	2.3247
Farm/Kidding Year Interaction	35	-0.5836	0.1207	-4.8347	< 0,0001	-0.8202	-0.347
Farm/Kidding Year Interaction	36	-0.3826	0.1309	-2.9238	0.0035	-0.6391	-0.1261
Farm/Kidding Year Interaction	37	-1.2489	0.5339	-2.3393	0.0193	-2.2954	-0.2025
Farm/Kidding Year Interaction	38	0.2595	0.5264	0.4929	0.6221	-0.7723	1.2913
Farm/Kidding Year Interaction	39	-0.4035	0.7406	-0.5449	0.5858	-1.8551	1.0481
Farm/Kidding Year Interaction	40	0.2083	0.0949	2.1946	0.0282	0.0223	0.3943
Farm/Kidding Year Interaction	41	-0.1762	0.1657	-1.0635	0.2876	-0.501	0.1486
Farm/Kidding Year Interaction	42	-0.9725	0.1455	-6.6822	< 0,0001	-1.2577	-0.6872
Farm/Kidding Year Interaction	43	-1.3758	0.5405	-2.5453	0.0109	-2.4353	-0.3164
Farm/Kidding Year Interaction	44	-0.5644	1.0467	-0.5392	0.5898	-2.616	1.4872
Farm/Kidding Year Interaction	45	0.3004	0.1645	1.8258	0.0679	-0.0221	0.6229
Farm/Kidding Year Interaction	46	-0.1077	0.5448	-0.1978	0.8432	-1.1755	0.96
Farm/Kidding Year Interaction	47	0.8656	0.9062	0.9552	0.3395	-0.9106	2.6419
Farm/Kidding Year Interaction	48	0.1942	0.0799	2.431	0.0151	0.0376	0.3508
Farm/Kidding Year Interaction	49	-0.0229	0.2266	-0.1012	0.9194	-0.467	0.4211
Farm/Kidding Year Interaction	50	-0.1185	0.1317	-0.8996	0.3683	-0.3767	0.1397
Farm/Kidding Year Interaction	51	-0.3671	0.1347	-2.7246	0.0064	-0.6312	-0.103
Farm/Kidding Year Interaction	52	0.4683	0.0952	4.9201	< 0,0001	0.2818	0.6549
Farm/Kidding Year Interaction	53	0.2542	0.4114	0.6177	0.5368	-0.5523	1.0606
Farm/Kidding Year Interaction	54	-0.4704	0.2115	-2.2246	0.0261	-0.8849	-0.0559
Farm/Kidding Year Interaction	55	-0.3843	0.2264	-1.6978	0.0896	-0.828	0.0594
Farm/Kidding Year Interaction	56	0	0
Farm/Kidding Year Interaction	57	-0.1296	0.146	-0.888	0.3746	-0.4157	0.1565
Farm/Kidding Year Interaction	58	0.4421	0.1122	3.9413	< 0,0001	0.2223	0.662
Farm/Kidding Year Interaction	59	-0.1727	0.2513	-0.6875	0.4918	-0.6652	0.3197
Farm/Kidding Year Interaction	60	-0.1345	0.1099	-1.2239	0.221	-0.35	0.0809
Farm/Kidding Year Interaction	61	-0.345	0.0932	-3.704	0.0002	-0.5276	-0.1625
Farm/Kidding Year Interaction	62	-1.101	0.3407	-3.2314	0.0012	-1.7689	-0.4332
Farm/Kidding Year Interaction	63	0.2916	0.0745	3.9153	< 0,0001	0.1456	0.4375
Farm/Kidding Year Interaction	64	-0.3963	0.2004	-1.9773	0.048	-0.7892	-0.0035
Farm/Kidding Year Interaction	65	0.3975	0.2052	1.9369	0.0528	-0.0048	0.7997
Farm/Kidding Year Interaction	66	-0.2497	0.1309	-1.9071	0.0565	-0.5063	0.0069
Farm/Kidding Year Interaction	67	0	0
Farm/Kidding Year Interaction	68	0.5206	0.3769	1.3814	0.1672	-0.2181	1.2593
Farm/Kidding Year Interaction	69	0.9941	0.3733	2.6632	0.0077	0.2625	1.7257
Farm/Kidding Year Interaction	70	0.3715	0.6414	0.5793	0.5624	-0.8855	1.6286
Farm/Kidding Year Interaction	71	-0.104	0.0865	-1.2016	0.2295	-0.2735	0.0656
Farm/Kidding Year Interaction	72	-0.1239	0.1013	-1.2227	0.2215	-0.3226	0.0747
Farm/Kidding Year Interaction	73	-0.6835	0.5268	-1.2976	0.1944	-1.716	0.349
Farm/Kidding Year Interaction	74	-0.4608	0.1505	-3.0625	0.0022	-0.7557	-0.1659
Farm/Kidding Year Interaction	75	-0.3661	0.1296	-2.8243	0.0047	-0.6201	-0.112
Farm/Kidding Year Interaction	76	-1.1276	0.3517	-3.2062	0.0013	-1.8169	-0.4383
Farm/Kidding Year Interaction	77	0	0
Farm/Kidding Year Interaction	78	0.2249	0.0855	2.6298	0.0085	0.0573	0.3926
Farm/Kidding Year Interaction	79	-0.5815	0.0844	-6.8877	< 0,0001	-0.747	-0.416
Farm/Kidding Year Interaction	80	1.3646	0.5318	2.566	0.0103	0.3223	2.4069
Farm/Kidding Year Interaction	81	1.5143	0.5309	2.8522	0.0043	0.4737	2.5549
Farm/Kidding Year Interaction	82	0.29	0.9063	0.32	0.749	-1.4864	2.0664
Farm/Kidding Year Interaction	83	0	0
Farm/Kidding Year Interaction	84	-0.1404	0.1405	-0.9991	0.3177	-0.4158	0.135
Farm/Kidding Year Interaction	85	-0.132	0.1649	-0.8009	0.4232	-0.4552	0.1911
Farm/Kidding Year Interaction	86	0	0
Farm/Kidding Year Interaction	87	-0.1596	0.1755	-0.9091	0.3633	-0.5036	0.1845
Farm/Kidding Year Interaction	88	-0.077	0.2456	-0.3137	0.7538	-0.5585	0.4044
Farm/Kidding Year Interaction	89	-0.8352	0.1426	-5.8589	< 0,0001	-1.1146	-0.5558
Farm/Kidding Year Interaction	90	-0.5058	0.1291	-3.9187	< 0,0001	-0.7588	-0.2528
Farm/Kidding Year Interaction	91	-0.4612	0.1305	-3.5342	0.0004	-0.7169	-0.2054
Farm/Kidding Year Interaction	92	-0.3849	0.0602	-6.3923	< 0,0001	-0.503	-0.2669
Farm/Kidding Year Interaction	93	-0.5495	0.0415	-13.2548	< 0,0001	-0.6308	-0.4683
Farm/Kidding Year Interaction	94	0.2856	0.7434	0.3842	0.7009	-1.1715	1.7427
Farm/Kidding Year Interaction	95	-0.2769	0.5256	-0.5267	0.5984	-1.3071	0.7534
Farm/Kidding Year Interaction	96	-1.5612	1.0465	-1.4918	0.1358	-3.6123	0.49
Farm/Kidding Year Interaction	97	-0.058	0.4488	-0.1292	0.8972	-0.9375	0.8216
Farm/Kidding Year Interaction	98	-0.2469	0.1688	-1.4628	0.1435	-0.5776	0.0839
Farm/Kidding Year Interaction	99	-0.5701	0.254	-2.2448	0.0248	-1.0679	-0.0723
Farm/Kidding Year Interaction	100	-0.5458	0.2538	-2.1503	0.0315	-1.0433	-0.0483
Farm/Kidding Year Interaction	101	-1.2594	0.1405	-8.9653	< 0,0001	-1.5347	-0.984
Farm/Kidding Year Interaction	102	-0.5664	0.1418	-3.9946	< 0,0001	-0.8443	-0.2885
Farm/Kidding Year Interaction	103	-0.7355	0.1668	-4.4083	< 0,0001	-1.0625	-0.4085
Farm/Kidding Year Interaction	104	-1.7074	0.7521	-2.2701	0.0232	-3.1817	-0.2332
Farm/Kidding Year Interaction	105	-0.5432	0.104	-5.2223	< 0,0001	-0.747	-0.3393
Farm/Kidding Year Interaction	106	-0.8916	0.1008	-8.8456	< 0,0001	-1.0891	-0.694
Farm/Kidding Year Interaction	107	-1.1648	0.7477	-1.5579	0.1193	-2.6302	0.3007
Farm/Kidding Year Interaction	108	-1.2248	0.4373	-2.801	0.0051	-2.0818	-0.3677
Farm/Kidding Year Interaction	109	-0.1975	0.0999	-1.9776	0.048	-0.3933	-0.0018
Farm/Kidding Year Interaction	110	-0.0219	0.0544	-0.402	0.6877	-0.1286	0.0848
Farm/Kidding Year Interaction	111	-1.1857	0.4319	-2.7452	0.006	-2.0323	-0.3391
Farm/Kidding Year Interaction	112	0.0602	0.121	0.4979	0.6186	-0.1769	0.2974
Farm/Kidding Year Interaction	113	-0.6543	0.3434	-1.9054	0.0567	-1.3274	0.0188
Farm/Kidding Year Interaction	114	-0.0583	0.0944	-0.6174	0.537	-0.2434	0.1268
Farm/Kidding Year Interaction	115	-0.4901	0.2749	-1.7827	0.0746	-1.0289	0.0487
Farm/Kidding Year Interaction	116	0.1404	0.1176	1.194	0.2325	-0.0901	0.371
Farm/Kidding Year Interaction	117	1.0163	0.7474	1.3599	0.1739	-0.4485	2.4811
Farm/Kidding Year Interaction	118	0.1557	0.1481	1.0514	0.2931	-0.1345	0.4459
Farm/Kidding Year Interaction	119	0	0
Farm/Kidding Year Interaction	120	-0.8373	0.1527	-5.4825	< 0,0001	-1.1366	-0.538
Farm/Kidding Year Interaction	121	-2.1842	0.2504	-8.7236	< 0,0001	-2.6749	-1.6934
Farm/Kidding Year Interaction	122	-0.3899	0.1414	-2.7566	0.0058	-0.6671	-0.1127
Farm/Kidding Year Interaction	123	-1.1498	0.1888	-6.0895	< 0,0001	-1.5199	-0.7797
Farm/Kidding Year Interaction	124	-1.7188	0.2298	-7.4786	< 0,0001	-2.1693	-1.2683
Farm/Kidding Year Interaction	125	-2.4382	0.5494	-4.4379	< 0,0001	-3.515	-1.3613
Farm/Kidding Year Interaction	126	0.0977	0.3052	0.3202	0.7488	-0.5005	0.6959
Farm/Kidding Year Interaction	127	0	0
Farm/Kidding Year Interaction	128	0.1662	0.1237	1.3432	0.1792	-0.0763	0.4088
Farm/Kidding Year Interaction	129	0.6717	0.1734	3.874	0.0001	0.3318	1.0115
Farm/Kidding Year Interaction	130	0.3417	0.345	0.9905	0.3219	-0.3345	1.0179
Farm/Kidding Year Interaction	131	0.3956	0.1778	2.2252	0.0261	0.0472	0.744
Farm/Kidding Year Interaction	132	0.1239	0.1253	0.9887	0.3228	-0.1217	0.3694
Farm/Kidding Year Interaction	133	0.1531	0.0904	1.6941	0.0903	-0.024	0.3302
Farm/Kidding Year Interaction	134	-1.7101	0.8544	-2.0015	0.0453	-3.3849	-0.0354
Farm/Kidding Year Interaction	135	0.3152	0.1332	2.3668	0.0179	0.0542	0.5763
Farm/Kidding Year Interaction	136	0	0
Farm/Kidding Year Interaction	137	0.0234	0.1166	0.201	0.8407	-0.2051	0.2519
Farm/Kidding Year Interaction	138	-0.2353	0.1235	-1.9049	0.0568	-0.4773	0.0068
Farm/Kidding Year Interaction	139	0.4684	0.1834	2.5535	0.0107	0.1089	0.8279
Farm/Kidding Year Interaction	140	0.0834	0.1449	0.5755	0.565	-0.2006	0.3674
Farm/Kidding Year Interaction	141	0	0
Farm/Kidding Year Interaction	142	0.0557	0.2335	0.2388	0.8113	-0.4018	0.5133
Farm/Kidding Year Interaction	143	0.4118	0.1867	2.2059	0.0274	0.0459	0.7777
Farm/Kidding Year Interaction	144	-0.5073	0.1527	-3.3214	0.0009	-0.8066	-0.2079
Farm/Kidding Year Interaction	145	0.6705	0.2944	2.2775	0.0228	0.0935	1.2476
Farm/Kidding Year Interaction	146	0	0
Farm/Kidding Year Interaction	147	-0.3682	0.2271	-1.6211	0.105	-0.8133	0.077
Farm/Kidding Year Interaction	148	0.4458	0.1288	3.4603	0.0005	0.1933	0.6983
Farm/Kidding Year Interaction	149	0.1857	0.1364	1.3614	0.1734	-0.0817	0.4531
Farm/Kidding Year Interaction	150	-0.1504	0.2059	-0.7305	0.4651	-0.554	0.2532
Farm/Kidding Year Interaction	151	0.258	0.1339	1.9258	0.0541	-0.0046	0.5205
Farm/Kidding Year Interaction	152	0.1979	0.1707	1.1592	0.2464	-0.1367	0.5326
Farm/Kidding Year Interaction	153	0.3141	0.5265	0.5967	0.5507	-0.7178	1.346
Farm/Kidding Year Interaction	154	0.5267	0.7403	0.7114	0.4769	-0.9244	1.9778
Farm/Kidding Year Interaction	155	0.6759	0.1408	4.8008	< 0,0001	0.3999	0.9518
Farm/Kidding Year Interaction	156	0.3225	0.1171	2.7552	0.0059	0.0931	0.552
Farm/Kidding Year Interaction	157	0.0119	0.5304	0.0225	0.982	-1.0277	1.0515
Farm/Kidding Year Interaction	158	0.0772	0.2979	0.259	0.7956	-0.5067	0.661
Farm/Kidding Year Interaction	159	0.6469	0.78	0.8294	0.4069	-0.8819	2.1757
Farm/Kidding Year Interaction	160	-0.1959	0.0957	-2.046	0.0408	-0.3835	-0.0082
Farm/Kidding Year Interaction	161	-1.0631	0.4353	-2.4421	0.0146	-1.9163	-0.2099
Farm/Kidding Year Interaction	162	0.3953	0.0629	6.2862	< 0,0001	0.2721	0.5186
Farm/Kidding Year Interaction	163	0.5754	0.2687	2.1416	0.0322	0.0488	1.102
Farm/Kidding Year Interaction	164	-0.3995	0.7435	-0.5373	0.591	-1.8569	1.0578
Farm/Kidding Year Interaction	165	-0.3951	0.1325	-2.9811	0.0029	-0.6549	-0.1353
Farm/Kidding Year Interaction	166	0.1248	0.1317	0.9477	0.3433	-0.1333	0.3829
Farm/Kidding Year Interaction	167	0.5786	0.1448	3.9968	< 0,0001	0.2949	0.8623
Farm/Kidding Year Interaction	168	0.1429	0.1446	0.9883	0.323	-0.1405	0.4264
Farm/Kidding Year Interaction	169	0.0799	0.1455	0.5494	0.5828	-0.2053	0.3652
Farm/Kidding Year Interaction	170	-0.2458	0.1689	-1.4555	0.1455	-0.5768	0.0852
Farm/Kidding Year Interaction	171	-0.0828	0.1943	-0.4262	0.6699	-0.4636	0.298
Farm/Kidding Year Interaction	172	0.2577	0.0692	3.7221	0.0002	0.122	0.3933
Farm/Kidding Year Interaction	173	0.7005	0.1758	3.9848	< 0,0001	0.3559	1.0451
Farm/Kidding Year Interaction	174	0.4885	0.1285	3.8012	0.0001	0.2366	0.7403
Farm/Kidding Year Interaction	175	0.0287	0.1206	0.2379	0.812	-0.2077	0.265
Farm/Kidding Year Interaction	176	-0.0917	0.2157	-0.4251	0.6708	-0.5146	0.3311
Farm/Kidding Year Interaction	177	0.6156	0.1062	5.7975	< 0,0001	0.4075	0.8238
Farm/Kidding Year Interaction	178	0.1181	0.1102	1.072	0.2837	-0.0978	0.3341
Farm/Kidding Year Interaction	179	0.2673	0.0691	3.8676	0.0001	0.1318	0.4028
Farm/Kidding Year Interaction	180	0	0
Farm/Kidding Year Interaction	181	0	0
Farm/Kidding Year Interaction	182	-0.4157	1.0464	-0.3973	0.6911	-2.4667	1.6352
Farm/Kidding Year Interaction	183	-0.458	0.2157	-2.1238	0.0337	-0.8808	-0.0353
Farm/Kidding Year Interaction	184	-0.5842	0.4096	-1.4262	0.1538	-1.387	0.2187
Farm/Kidding Year Interaction	185	0.1717	0.1331	1.2896	0.1972	-0.0893	0.4326
Farm/Kidding Year Interaction	186	0.4179	0.2112	1.9784	0.0479	0.0039	0.8318
Farm/Kidding Year Interaction	187	0.4945	0.1069	4.6254	< 0,0001	0.2849	0.704
Farm/Kidding Year Interaction	188	0.2165	0.1269	1.7062	0.088	-0.0322	0.4652
Farm/Kidding Year Interaction	189	1.1527	0.4073	2.83	0.0047	0.3544	1.951
Farm/Kidding Year Interaction	190	0.9923	0.373	2.6604	0.0078	0.2612	1.7233
Farm/Kidding Year Interaction	191	0.1303	0.5331	0.2445	0.8069	-0.9145	1.1751
Farm/Kidding Year Interaction	192	0.1803	0.1092	1.6512	0.0987	-0.0337	0.3942
Farm/Kidding Year Interaction	193	0.4088	0.0809	5.052	< 0,0001	0.2502	0.5674
Farm/Kidding Year Interaction	194	-0.0268	0.433	-0.0618	0.9507	-0.8755	0.822
Farm/Kidding Year Interaction	195	0.0186	0.1567	0.1188	0.9055	-0.2886	0.3258
Farm/Kidding Year Interaction	196	-0.2094	0.2075	-1.009	0.313	-0.6161	0.1973
Farm/Kidding Year Interaction	197	0.3193	0.0907	3.5187	0.0004	0.1414	0.4971
Farm/Kidding Year Interaction	198	0.412	0.29	1.4205	0.1555	-0.1565	0.9804
Farm/Kidding Year Interaction	199	0.0101	0.3994	0.0253	0.9798	-0.7727	0.7929
Farm/Kidding Year Interaction	200	0.5432	0.0792	6.856	< 0,0001	0.3879	0.6985
Farm/Kidding Year Interaction	201	0.283	0.142	1.9928	0.0463	0.0047	0.5613
Farm/Kidding Year Interaction	202	0	0
Farm/Kidding Year Interaction	203	0.4515	0.1534	2.9429	0.0033	0.1508	0.7523
Farm/Kidding Year Interaction	204	0.263	0.0731	3.6008	0.0003	0.1199	0.4062
Farm/Kidding Year Interaction	205	0	0
Farm/Kidding Year Interaction	206	0.2854	0.5258	0.5428	0.5873	-0.7451	1.3158
Farm/Kidding Year Interaction	207	0	0
Farm/Kidding Year Interaction	208	0	0
Farm/Kidding Year Interaction	209	-0.077	0.1608	-0.479	0.6319	-0.3921	0.2381
Farm/Kidding Year Interaction	210	-0.18	0.1157	-1.5554	0.1199	-0.4068	0.0468
Farm/Kidding Year Interaction	211	-0.6647	0.3455	-1.9239	0.0544	-1.3419	0.0125
Farm/Kidding Year Interaction	212	0.2785	0.0771	3.6141	0.0003	0.1275	0.4296
Farm/Kidding Year Interaction	213	-0.2078	0.4302	-0.4832	0.629	-1.051	0.6353
Farm/Kidding Year Interaction	214	0.1216	0.0876	1.3887	0.1649	-0.05	0.2933
Farm/Kidding Year Interaction	215	0.2395	0.4342	0.5517	0.5812	-0.6115	1.0906
Farm/Kidding Year Interaction	216	-0.0127	0.7481	-0.017	0.9864	-1.479	1.4536
Farm/Kidding Year Interaction	217	0.2127	0.0971	2.191	0.0285	0.0224	0.403
Farm/Kidding Year Interaction	218	-0.5491	0.7455	-0.7366	0.4614	-2.0103	0.912
Farm/Kidding Year Interaction	219	0.539	0.1024	5.2657	< 0,0001	0.3384	0.7396
Farm/Kidding Year Interaction	220	0.786	0.342	2.2982	0.0216	0.1156	1.4563
Farm/Kidding Year Interaction	221	0.3041	0.1024	2.9686	0.003	0.1033	0.5048
Farm/Kidding Year Interaction	222	0.2517	0.0713	3.5314	0.0004	0.112	0.3913
Farm/Kidding Year Interaction	223	0.3309	0.1317	2.5129	0.012	0.0728	0.589
Farm/Kidding Year Interaction	224	0.2727	0.1079	2.527	0.0115	0.0612	0.4843
Farm/Kidding Year Interaction	225	0.2133	0.0705	3.0246	0.0025	0.0751	0.3516
Farm/Kidding Year Interaction	226	-0.1081	0.0924	-1.1704	0.2418	-0.2892	0.073
Farm/Kidding Year Interaction	227	-0.0938	0.1113	-0.843	0.3992	-0.3119	0.1243
Farm/Kidding Year Interaction	228	-0.2159	0.1755	-1.2298	0.2188	-0.5599	0.1282
Farm/Kidding Year Interaction	229	0.5466	0.1199	4.5597	< 0,0001	0.3116	0.7815
Farm/Kidding Year Interaction	230	0.519	0.1775	2.9245	0.0035	0.1711	0.8668
Farm/Kidding Year Interaction	231	0.2691	0.0953	2.8254	0.0047	0.0824	0.4558
Farm/Kidding Year Interaction	232	0.1917	0.1171	1.6376	0.1015	-0.0378	0.4212
Farm/Kidding Year Interaction	233	0.0502	0.1109	0.4527	0.6508	-0.1671	0.2675
Farm/Kidding Year Interaction	234	0.0798	0.0808	0.9882	0.3231	-0.0785	0.2382
Farm/Kidding Year Interaction	235	-0.3018	0.2503	-1.2055	0.228	-0.7924	0.1889
Farm/Kidding Year Interaction	236	0.0817	0.2188	0.3735	0.7088	-0.3472	0.5107
Farm/Kidding Year Interaction	237	-0.143	0.1804	-0.7929	0.4279	-0.4965	0.2105
Farm/Kidding Year Interaction	238	0.4053	0.1786	2.2701	0.0232	0.0554	0.7553
Farm/Kidding Year Interaction	239	0.2335	0.096	2.4319	0.015	0.0453	0.4217
Farm/Kidding Year Interaction	240	0.2139	0.5314	0.4025	0.6873	-0.8276	1.2554
Farm/Kidding Year Interaction	241	-0.0797	0.129	-0.6182	0.5364	-0.3325	0.173
Farm/Kidding Year Interaction	242	0.0857	0.0572	1.4972	0.1343	-0.0265	0.1978
Farm/Kidding Year Interaction	243	-0.1303	0.0393	-3.3145	0.0009	-0.2074	-0.0533
Farm/Kidding Year Interaction	244	-0.0238	0.2099	-0.1135	0.9097	-0.4352	0.3875
Farm/Kidding Year Interaction	245	0.9616	0.3743	2.5693	0.0102	0.2281	1.6952
Farm/Kidding Year Interaction	246	0	0
Farm/Kidding Year Interaction	247	0.2274	0.1467	1.5497	0.1212	-0.0602	0.515
Farm/Kidding Year Interaction	248	0.2784	0.1601	1.7382	0.0822	-0.0355	0.5922
Farm/Kidding Year Interaction	249	-0.1938	0.1395	-1.3899	0.1646	-0.4672	0.0795
Farm/Kidding Year Interaction	250	-0.3308	0.125	-2.647	0.0081	-0.5758	-0.0859
Farm/Kidding Year Interaction	251	-0.2286	0.1294	-1.7675	0.0772	-0.4822	0.0249
Farm/Kidding Year Interaction	252	0.0422	0.1998	0.2109	0.8329	-0.3495	0.4338
Farm/Kidding Year Interaction	253	0.1609	0.1826	0.881	0.3783	-0.1971	0.5189
Farm/Kidding Year Interaction	254	0.0778	0.1564	0.4973	0.619	-0.2288	0.3843
Farm/Kidding Year Interaction	255	0.2843	0.126	2.2571	0.024	0.0374	0.5312
Farm/Kidding Year Interaction	256	0.419	0.2834	1.4783	0.1393	-0.1365	0.9746
Farm/Kidding Year Interaction	257	0.8867	0.745	1.1903	0.2339	-0.5735	2.3469
Farm/Kidding Year Interaction	258	0.788	0.7559	1.0425	0.2972	-0.6936	2.2696
Farm/Kidding Year Interaction	259	0.2371	0.8549	0.2773	0.7815	-1.4386	1.9128
Farm/Kidding Year Interaction	260	0	0
Farm/Kidding Year Interaction	261	0.3669	0.0704	5.2124	< 0,0001	0.2289	0.5049
Farm/Kidding Year Interaction	262	0.2784	0.1205	2.3093	0.0209	0.0421	0.5146
Farm/Kidding Year Interaction	263	-0.4396	0.3415	-1.2873	0.198	-1.1089	0.2297
Farm/Kidding Year Interaction	264	0.2074	0.1017	2.0391	0.0415	0.008	0.4067
Farm/Kidding Year Interaction	265	0.0509	0.3827	0.133	0.8942	-0.6992	0.801
Farm/Kidding Year Interaction	266	0.342	0.1167	2.9303	0.0034	0.1133	0.5708
Farm/Kidding Year Interaction	267	-0.0301	0.2185	-0.1379	0.8903	-0.4583	0.3981
Farm/Kidding Year Interaction	268	0.0936	0.1104	0.8479	0.3965	-0.1228	0.31
Farm/Kidding Year Interaction	269	0.2514	0.1378	1.8247	0.068	-0.0186	0.5214
Farm/Kidding Year Interaction	270	0.2235	0.0786	2.8425	0.0045	0.0694	0.3776
Farm/Kidding Year Interaction	271	0.0987	0.0749	1.318	0.1875	-0.0481	0.2454
Farm/Kidding Year Interaction	272	0.1447	0.0468	3.0914	0.002	0.0529	0.2364
Farm/Kidding Year Interaction	273	0.1557	0.1687	0.9224	0.3563	-0.1751	0.4864
Farm/Kidding Year Interaction	274	0.1894	0.0676	2.7999	0.0051	0.0568	0.322
Farm/Kidding Year Interaction	275	0.1926	0.076	2.5345	0.0113	0.0437	0.3415
Farm/Kidding Year Interaction	276	0.6344	0.1216	5.2181	< 0,0001	0.3961	0.8727
Farm/Kidding Year Interaction	277	0.4031	0.152	2.6528	0.008	0.1053	0.701
Farm/Kidding Year Interaction	278	0.1172	0.109	1.0748	0.2825	-0.0965	0.3309
Farm/Kidding Year Interaction	279	0.0912	0.1031	0.885	0.3762	-0.1108	0.2933
Farm/Kidding Year Interaction	280	-0.4095	0.4367	-0.9377	0.3484	-1.2654	0.4464
Farm/Kidding Year Interaction	281	-0.7031	0.7465	-0.9418	0.3463	-2.1663	0.7601
Farm/Kidding Year Interaction	282	-0.256	0.2289	-1.1183	0.2635	-0.7048	0.1927
Farm/Kidding Year Interaction	283	0.3803	0.5284	0.7196	0.4718	-0.6555	1.416
Farm/Kidding Year Interaction	284	0	0
Farm/Kidding Year Interaction	285	0.2341	0.5273	0.4441	0.657	-0.7993	1.2676
Farm/Kidding Year Interaction	286	0.2411	0.1046	2.306	0.0211	0.0362	0.4461
Farm/Kidding Year Interaction	287	0	0
Farm/Kidding Year Interaction	288	0.6676	0.1558	4.2846	< 0,0001	0.3622	0.9729
Farm/Kidding Year Interaction	289	0.6136	0.1381	4.445	< 0,0001	0.3431	0.8842
Farm/Kidding Year Interaction	290	0.2545	0.1016	2.5057	0.0122	0.0554	0.4536
Farm/Kidding Year Interaction	291	0	0
Farm/Kidding Year Interaction	292	0.6722	0.2047	3.2833	0.001	0.2709	1.0735
Farm/Kidding Year Interaction	293	0.2022	0.0884	2.2865	0.0222	0.0289	0.3755
Farm/Kidding Year Interaction	294	0.1572	0.0938	1.6755	0.0938	-0.0267	0.341
Farm/Kidding Year Interaction	295	0.4959	0.1448	3.4247	0.0006	0.2121	0.7797
Farm/Kidding Year Interaction	296	0	0
Farm/Kidding Year Interaction	297	0	0
Farm/Kidding Year Interaction	298	-0.0517	0.1876	-0.2759	0.7826	-0.4194	0.3159
Farm/Kidding Year Interaction	299	0.2978	0.0974	3.0569	0.0022	0.1069	0.4887
Farm/Kidding Year Interaction	300	-0.0686	0.1484	-0.4622	0.6439	-0.3595	0.2223
Farm/Kidding Year Interaction	301	-0.0664	0.1455	-0.4567	0.6479	-0.3516	0.2187
Farm/Kidding Year Interaction	302	0.6841	0.1792	3.8162	0.0001	0.3327	1.0354
Farm/Kidding Year Interaction	303	0.3082	0.0865	3.5628	0.0004	0.1386	0.4777
Farm/Kidding Year Interaction	304	0.3497	0.0617	5.6624	< 0,0001	0.2286	0.4707
Farm/Kidding Year Interaction	305	-0.0105	0.2196	-0.0479	0.9618	-0.441	0.42
Farm/Kidding Year Interaction	306	0.0142	0.0435	0.3262	0.7443	-0.0711	0.0995
Farm/Kidding Year Interaction	307	-0.0148	0.0709	-0.2091	0.8344	-0.1539	0.1242
Farm/Kidding Year Interaction	308	-0.0435	0.1247	-0.3491	0.727	-0.2881	0.201
Farm/Kidding Year Interaction	309	0.2211	0.0989	2.2357	0.0254	0.0273	0.4149
Farm/Kidding Year Interaction	310	0.0014	0.216	0.0064	0.9949	-0.422	0.4248
Farm/Kidding Year Interaction	311	-0.06	0.2213	-0.2709	0.7865	-0.4938	0.3739
Farm/Kidding Year Interaction	312	-0.0352	0.1452	-0.2422	0.8086	-0.3197	0.2494
Farm/Kidding Year Interaction	313	0.3697	0.1181	3.1309	0.0017	0.1383	0.6011
Farm/Kidding Year Interaction	314	0.0954	0.0825	1.1568	0.2474	-0.0663	0.2571
Farm/Kidding Year Interaction	315	0.4805	0.108	4.4499	< 0,0001	0.2689	0.6922
Farm/Kidding Year Interaction	316	0.0114	0.0915	0.1249	0.9006	-0.1679	0.1908
Farm/Kidding Year Interaction	317	0.0725	0.0947	0.765	0.4443	-0.1132	0.2582
Farm/Kidding Year Interaction	318	0	0
Farm/Kidding Year Interaction	319	0.1802	0.3094	0.5823	0.5604	-0.4262	0.7866
Farm/Kidding Year Interaction	320	0.528	0.3135	1.6838	0.0922	-0.0866	1.1425
Farm/Kidding Year Interaction	321	0	0
Farm/Kidding Year Interaction	322	0.3005	0.1567	1.918	0.0551	-0.0066	0.6076
Farm/Kidding Year Interaction	323	0.4397	0.1837	2.393	0.0167	0.0796	0.7998
Farm/Kidding Year Interaction	324	0	0
Farm/Kidding Year Interaction	325	0.223	0.5253	0.4245	0.6712	-0.8066	1.2525
Farm/Kidding Year Interaction	326	0.1038	0.0783	1.3251	0.1852	-0.0497	0.2574
Farm/Kidding Year Interaction	327	-0.0469	0.1333	-0.352	0.7248	-0.3081	0.2143
Farm/Kidding Year Interaction	328	-0.3735	0.2311	-1.616	0.1061	-0.8265	0.0795
Farm/Kidding Year Interaction	329	-0.0793	0.0697	-1.1384	0.255	-0.2159	0.0573
Farm/Kidding Year Interaction	330	0.0824	0.1094	0.7537	0.451	-0.1319	0.2968
Farm/Kidding Year Interaction	331	0.1273	0.0777	1.6394	0.1011	-0.0249	0.2795
Farm/Kidding Year Interaction	332	-0.0596	0.1651	-0.3608	0.7182	-0.3832	0.264
Farm/Kidding Year Interaction	333	0.0545	0.0809	0.6739	0.5004	-0.104	0.213
Farm/Kidding Year Interaction	334	0	0
Farm/Kidding Year Interaction	335	-0.0476	0.1325	-0.3595	0.7193	-0.3072	0.212
Farm/Kidding Year Interaction	336	0.091	0.1347	0.6757	0.4993	-0.173	0.3551
Farm/Kidding Year Interaction	337	0.0655	0.0984	0.6658	0.5055	-0.1274	0.2584
Farm/Kidding Year Interaction	338	-0.1349	0.1126	-1.1988	0.2306	-0.3555	0.0857
Farm/Kidding Year Interaction	339	0.0616	0.2019	0.3051	0.7603	-0.3342	0.4574
Farm/Kidding Year Interaction	340	-0.1419	0.2434	-0.5831	0.5599	-0.6189	0.3351
Farm/Kidding Year Interaction	341	0.3837	0.1426	2.6917	0.0071	0.1043	0.6632
Farm/Kidding Year Interaction	342	0.1769	0.1078	1.6407	0.1009	-0.0344	0.3883
Farm/Kidding Year Interaction	343	0.0139	0.1142	0.1215	0.9033	-0.21	0.2378
Farm/Kidding Year Interaction	344	-0.0317	0.2737	-0.1159	0.9077	-0.5683	0.5048
Farm/Kidding Year Interaction	345	-0.3342	0.2924	-1.143	0.2531	-0.9073	0.2389
Farm/Kidding Year Interaction	346	-0.1072	0.2526	-0.4242	0.6714	-0.6023	0.388
Farm/Kidding Year Interaction	347	-0.0176	0.1146	-0.1532	0.8782	-0.2422	0.2071
Farm/Kidding Year Interaction	348	0.0554	0.1138	0.4873	0.6261	-0.1676	0.2784
Farm/Kidding Year Interaction	349	0.257	0.0937	2.7434	0.0061	0.0734	0.4405
Farm/Kidding Year Interaction	350	-0.1935	0.239	-0.8095	0.4182	-0.662	0.275
Farm/Kidding Year Interaction	351	0.1947	0.278	0.7003	0.4837	-0.3502	0.7396
Farm/Kidding Year Interaction	352	0.8065	0.5344	1.509	0.1313	-0.241	1.854
Farm/Kidding Year Interaction	353	0	0
Farm/Kidding Year Interaction	354	0	0
Farm/Kidding Year Interaction	355	-0.351	0.2074	-1.6929	0.0905	-0.7575	0.0554
Farm/Kidding Year Interaction	356	0	0
Farm/Kidding Year Interaction	357	0	0
Farm/Kidding Year Interaction	358	0	0
Farm/Kidding Year Interaction	359	0.8115	0.5307	1.5292	0.1262	-0.2286	1.8517
Farm/Kidding Year Interaction	360	0	0
Farm/Kidding Year Interaction	361	0	0
Farm/Kidding Year Interaction	362	-0.2066	0.1701	-1.2142	0.2247	-0.54	0.1269
Farm/Kidding Year Interaction	363	0	0
Farm/Kidding Year Interaction	364	0	0
Farm/Kidding Year Interaction	365	0	0
Farm/Kidding Year Interaction	366	0	0
Farm/Kidding Year Interaction	367	0	0
Farm/Kidding Year Interaction	368	0	0
Farm/Kidding Year Interaction	369	0	0
Farm/Kidding Year Interaction	370	0.3671	0.3409	1.077	0.2815	-0.301	1.0352
Farm/Kidding Year Interaction	371	0	0
Farm/Kidding Year Interaction	372	0	0
Farm/Kidding Year Interaction	373	0	0
Farm/Kidding Year Interaction	374	0	0
Farm/Kidding Year Interaction	375	0	0
Farm/Kidding Year Interaction	376	0	0
Farm/Kidding Year Interaction	377	0	0
Farm/Kidding Year Interaction	378	0	0
Farm/Kidding Year Interaction	379	0	0
Farm/Kidding Year Interaction	380	0	0
Farm/Kidding Year Interaction	381	0	0
Farm/Kidding Year Interaction	382	0	0
Farm/Kidding Year Interaction	383	0	0
Farm/Kidding Year Interaction	384	0	0
Farm/Kidding Year Interaction	385	0	0
Farm/Kidding Year Interaction	386	-0.179	0.5336	-0.3355	0.7373	-1.2248	0.8668
Farm/Kidding Year Interaction	387	0	0
Farm/Kidding Year Interaction	388	0	0
Farm/Kidding Year Interaction	389	0	0
Farm/Kidding Year Interaction	390	-0.1014	0.1483	-0.6842	0.4939	-0.392	0.1892
Farm/Kidding Year Interaction	391	0	0
Farm/Kidding Year Interaction	392	0	0
Farm/Kidding Year Interaction	393	0	0
Farm/Kidding Year Interaction	394	0	0
Farm/Kidding Year Interaction	395	0	0
Farm/Kidding Year Interaction	396	0	0
Farm/Kidding Year Interaction	397	0	0
Farm/Kidding Year Interaction	398	-0.1658	0.246	-0.6741	0.5003	-0.648	0.3163
Farm/Kidding Year Interaction	399	0	0
Farm/Kidding Year Interaction	400	0.1111	0.4325	0.2569	0.7973	-0.7367	0.9589
Farm/Kidding Year Interaction	401	0	0
Farm/Kidding Year Interaction	402	0	0
Farm/Kidding Year Interaction	403	0	0
Farm/Kidding Year Interaction	404	0	0
Farm/Kidding Year Interaction	405	0	0
Farm/Kidding Year Interaction	406	0	0
Farm/Kidding Year Interaction	407	0	0
Farm/Kidding Year Interaction	408	0	0
Farm/Kidding Year Interaction	409	0	0
Farm/Kidding Year Interaction	410	0	0
Farm/Kidding Year Interaction	411	0	0
Farm/Kidding Year Interaction	412	0	0
Farm/Kidding Year Interaction	413	0	0
Farm/Kidding Year Interaction	414	0	0
Farm/Kidding Year Interaction	415	0	0
Farm/Kidding Year Interaction	416	0	0
Farm/Kidding Year Interaction	417	0	0
Farm/Kidding Year Interaction	418	0	0
Farm/Kidding Year Interaction	419	0	0
Farm/Kidding Year Interaction	420	0	0
Farm/Kidding Year Interaction	421	0	0
Farm/Kidding Year Interaction	422	0	0
Farm/Kidding Year Interaction	423	0	0
Farm/Kidding Year Interaction	424	0	0
Farm/Kidding Year Interaction	425	0	0
Farm/Kidding Year Interaction	426	0	0
Farm/Kidding Year Interaction	427	0	0
Farm/Kidding Year Interaction	428	0	0
Farm/Kidding Year Interaction	429	0	0
Farm/Kidding Year Interaction	430	0	0
Farm/Kidding Year Interaction	431	0	0
Farm/Kidding Year Interaction	432	0	0
Farm/Kidding Year Interaction	433	0	0
Farm/Kidding Year Interaction	434	0	0
Farm/Kidding Year Interaction	435	0	0
Farm/Kidding Year Interaction	436	0	0
Farm/Kidding Year Interaction	437	0	0
Farm/Kidding Year Interaction	438	0	0
Farm/Kidding Year Interaction	439	0	0
Farm/Kidding Year Interaction	440	0	0
Farm/Kidding Year Interaction	441	0	0
Farm/Kidding Year Interaction	442	0	0
Farm/Kidding Year Interaction	443	0	0
Farm/Kidding Year Interaction	444	0	0
Farm/Kidding Year Interaction	445	0	0
Farm/Kidding Year Interaction	446	0	0
Farm/Kidding Year Interaction	447	0	0
Farm/Kidding Year Interaction	448	0	0
Farm/Kidding Year Interaction	449	0	0
Farm/Kidding Year Interaction	450	0	0
Farm/Kidding Year Interaction	451	0	0
Farm/Kidding Year Interaction	452	0	0
Farm/Kidding Year Interaction	453	0	0
Farm/Kidding Year Interaction	454	0	0
Farm/Kidding Year Interaction	455	0	0
Farm/Kidding Year Interaction	456	0	0
Farm/Kidding Year Interaction	457	0	0
Farm/Kidding Year Interaction	458	0	0
Farm/Kidding Year Interaction	459	0	0
Farm/Kidding Year Interaction	460	0	0
Farm/Kidding Year Interaction	461	0	0
Farm/Kidding Year Interaction	462	0	0
Farm/Kidding Year Interaction	463	0	0
Farm/Kidding Year Interaction	464	0	0
Farm/Kidding Year Interaction	465	0	0
Farm/Kidding Year Interaction	466	0	0
Farm/Kidding Year Interaction	467	0	0
Farm/Kidding Year Interaction	468	0	0
Farm/Kidding Year Interaction	469	0	0
Farm/Kidding Year Interaction	470	0	0
Farm/Kidding Year Interaction	471	0	0
Farm/Kidding Year Interaction	472	0	0
Farm/Kidding Year Interaction	473	0	0
Farm/Kidding Year Interaction	474	0	0
Farm/Kidding Year Interaction	475	0	0
Farm/Kidding Year Interaction	476	0	0

## Sheet: Rear Insertion Height
Parameter/Fixed Effect/Covariate	Level	Value	Standard error	t	Pr > |t|	Lower bound (95%)	Upper bound (95%)
Intercept	Intercept	5.7716	0.8327	6.9311	< 0,0001	4.1395	7.4037
Age (in years)	Age (in years)	-0.013	0.0041	-3.1525	0.0016	-0.0211	-0.0049
Days in Milk	Days in Milk	0.0023	0.0001	30.2072	< 0,0001	0.0021	0.0024
Farm	1	-0.3171	0.8347	-0.3799	0.704	-1.9532	1.319
Farm	2	-0.342	0.8374	-0.4084	0.683	-1.9832	1.2993
Farm	3	-0.2625	0.8368	-0.3137	0.7538	-1.9027	1.3777
Farm	4	-0.2851	0.8363	-0.341	0.7331	-1.9242	1.3539
Farm	5	-0.663	0.8371	-0.792	0.4283	-2.3038	0.9777
Farm	6	0.8919	1.1776	0.7574	0.4488	-1.4162	3.2
Farm	7	-0.9824	0.8992	-1.0925	0.2746	-2.7449	0.7801
Farm	8	-0.5773	0.8336	-0.6925	0.4887	-2.2112	1.0567
Farm	9	-0.1985	0.8378	-0.2369	0.8127	-1.8407	1.4436
Farm	10	-0.5068	0.8489	-0.597	0.5505	-2.1705	1.157
Farm	11	0	0
Farm	12	0	0
Farm	13	1.1949	0.8456	1.4132	0.1576	-0.4624	2.8523
Farm	14	-2.1054	1.1837	-1.7787	0.0753	-4.4254	0.2146
Farm	15	-0.1263	0.8729	-0.1446	0.885	-1.8373	1.5847
Farm	16	-0.4857	0.8341	-0.5823	0.5604	-2.1205	1.1492
Farm	17	-0.8572	1.0193	-0.841	0.4004	-2.8551	1.1406
Farm	18	-0.7721	0.8409	-0.9182	0.3585	-2.4204	0.8761
Farm	19	-0.2304	0.8457	-0.2724	0.7853	-1.8879	1.4272
Farm	20	-0.2273	0.8663	-0.2624	0.793	-1.9252	1.4706
Farm	21	-0.4516	0.8361	-0.5402	0.5891	-2.0903	1.1871
Farm	22	0	0
Farm	23	-0.6309	0.8404	-0.7507	0.4528	-2.2782	1.0164
Farm	24	-0.386	0.8397	-0.4597	0.6458	-2.0318	1.2599
Farm	25	-0.4693	0.8465	-0.5544	0.5793	-2.1285	1.1899
Farm	26	0.3679	0.8437	0.436	0.6628	-1.2859	2.0216
Farm	27	0.6049	0.873	0.6929	0.4884	-1.1063	2.3161
Farm	28	0.5087	0.8552	0.5949	0.5519	-1.1674	2.1849
Farm	29	-0.1554	0.8349	-0.1862	0.8523	-1.7918	1.4809
Farm	30	0.2823	0.8389	0.3365	0.7365	-1.3619	1.9265
Farm	31	0.6368	0.8423	0.756	0.4496	-1.0141	2.2877
Farm	32	0.443	0.8364	0.5296	0.5964	-1.1965	2.0824
Farm	33	-0.0423	0.8461	-0.05	0.9601	-1.7006	1.616
Farm	34	0.1783	0.8452	0.211	0.8329	-1.4783	1.835
Farm	35	0.0547	0.8729	0.0627	0.95	-1.6561	1.7655
Farm	36	-0.4482	0.8379	-0.5349	0.5927	-2.0906	1.1941
Farm	37	0	0
Farm	38	-0.2086	0.8387	-0.2487	0.8036	-1.8524	1.4353
Farm	39	-0.153	0.8456	-0.181	0.8564	-1.8105	1.5044
Farm	40	0.8987	0.8371	1.0736	0.283	-0.7421	2.5395
Farm	41	-0.4223	0.8345	-0.5061	0.6128	-2.058	1.2134
Farm	42	0.9165	0.9306	0.9848	0.3247	-0.9076	2.7405
Farm	43	-0.5205	1.0194	-0.5106	0.6096	-2.5186	1.4776
Farm	44	-0.1028	0.8597	-0.1196	0.9048	-1.7879	1.5823
Farm	45	0.0771	1.0194	0.0756	0.9397	-1.9209	2.0751
Farm	46	0	0
Farm	47	0	0
Farm	48	0.1757	0.848	0.2072	0.8358	-1.4863	1.8377
Farm	49	-1.5008	1.1796	-1.2723	0.2033	-3.813	0.8113
Farm	50	-0.5813	0.8465	-0.6867	0.4922	-2.2405	1.0778
Farm	51	-0.4263	0.833	-0.5117	0.6088	-2.059	1.2064
Farm	52	0.3967	0.8417	0.4713	0.6374	-1.2531	2.0465
Farm	53	-0.2196	0.8353	-0.2629	0.7926	-1.8568	1.4176
Farm	54	-0.0176	0.8369	-0.021	0.9832	-1.6579	1.6227
Farm	55	0.2399	0.8693	0.276	0.7826	-1.4639	1.9437
Farm	56	-0.5918	0.8405	-0.7041	0.4814	-2.2393	1.0556
Farm	57	-0.192	0.8355	-0.2299	0.8182	-1.8297	1.4456
Farm	58	-0.2976	0.8401	-0.3542	0.7232	-1.9443	1.3491
Farm	59	-0.3941	0.8382	-0.4702	0.6382	-2.0369	1.2487
Farm	60	-1.6957	1.0211	-1.6606	0.0968	-3.6972	0.3057
Farm	61	0.4631	0.8384	0.5523	0.5807	-1.1802	2.1063
Farm	62	0.1773	0.8427	0.2104	0.8333	-1.4743	1.829
Farm	63	-0.7232	0.8432	-0.8577	0.3911	-2.376	0.9295
Farm	64	-0.7943	0.8353	-0.951	0.3416	-2.4315	0.8428
Farm	65	-0.5137	0.852	-0.6029	0.5466	-2.1837	1.1563
Farm	66	-0.2949	0.8426	-0.35	0.7263	-1.9465	1.3566
Farm	67	0	0
Farm	68	-0.2445	0.8344	-0.293	0.7695	-1.88	1.391
Farm	69	0.7896	0.8579	0.9204	0.3574	-0.8919	2.471
Farm	70	-0.1428	0.9612	-0.1486	0.8819	-2.0269	1.7412
Farm	71	0.3987	0.8495	0.4694	0.6388	-1.2662	2.0637
Farm	72	0	0
Farm	73	0.4372	0.8528	0.5126	0.6082	-1.2344	2.1087
Farm	74	-1.0317	0.8449	-1.2211	0.2221	-2.6878	0.6244
Farm	75	-0.0358	1.1772	-0.0305	0.9757	-2.3433	2.2716
Farm	76	-0.6727	0.8334	-0.8072	0.4196	-2.3061	0.9608
Farm	77	0	0
Farm	78	0.1942	1.0194	0.1905	0.8489	-1.8039	2.1923
Farm	79	-0.5745	0.8424	-0.682	0.4952	-2.2256	1.0765
Farm	80	0.2688	0.89	0.3021	0.7626	-1.4755	2.0132
Farm	81	-0.2249	0.8344	-0.2696	0.7875	-1.8604	1.4106
Farm	82	-1.7596	1.1775	-1.4943	0.1351	-4.0675	0.5484
Farm	83	0.8357	0.8392	0.9959	0.3193	-0.8091	2.4806
Farm	84	0.5536	0.9307	0.5948	0.552	-1.2707	2.3779
Farm	85	-0.8177	0.8358	-0.9784	0.3279	-2.4558	0.8204
Farm	86	0	0
Sex	Buck	0	0
Sex	Doe	0	0
Lactation Stage/Maturity	Primiparous	-0.2516	0.0135	-18.5715	< 0,0001	-0.2782	-0.2251
Lactation Stage/Maturity	Multiparous	0	0
Lactation Stage/Maturity	Buckling	0	0
Lactation Stage/Maturity	Buck	0	0
Kidding Month	January	0.0312	0.0269	1.159	0.2465	-0.0215	0.0839
Kidding Month	February	-0.0104	0.0272	-0.3831	0.7017	-0.0638	0.0429
Kidding Month	March	0.016	0.0283	0.567	0.5707	-0.0394	0.0714
Kidding Month	April	0.0534	0.0275	1.9381	0.0526	-0.0006	0.1073
Kidding Month	May	0.0556	0.0293	1.8981	0.0577	-0.0018	0.113
Kidding Month	June	0.1433	0.0305	4.6965	< 0,0001	0.0835	0.2031
Kidding Month	July	0.1315	0.0359	3.6647	0.0002	0.0611	0.2018
Kidding Month	August	0.1083	0.0288	3.7607	0.0002	0.0519	0.1647
Kidding Month	September	0.0592	0.0295	2.0098	0.0445	0.0015	0.117
Kidding Month	October	0.0133	0.0281	0.4731	0.6361	-0.0417	0.0683
Kidding Month	November	0.0079	0.0263	0.3016	0.7629	-0.0436	0.0595
Kidding Month	December	0	0
Kidding Season	Winter	0	0
Kidding Season	Spring	0	0
Kidding Season	Summer	0	0
Kidding Season	Autumn	0	0
Farm/Kidding Year Interaction	1	0.6413	0.5964	1.0752	0.2823	-0.5277	1.8104
Farm/Kidding Year Interaction	2	0.3198	0.3062	1.0444	0.2963	-0.2803	0.9198
Farm/Kidding Year Interaction	3	0.6705	0.2816	2.3811	0.0173	0.1186	1.2224
Farm/Kidding Year Interaction	4	0.5709	0.161	3.5469	0.0004	0.2554	0.8864
Farm/Kidding Year Interaction	5	0.4367	0.2933	1.4889	0.1365	-0.1382	1.0115
Farm/Kidding Year Interaction	6	1.5695	1.0193	1.5397	0.1236	-0.4284	3.5674
Farm/Kidding Year Interaction	7	3.5648	0.9711	3.6707	0.0002	1.6613	5.4682
Farm/Kidding Year Interaction	8	-0.7357	0.8473	-0.8683	0.3852	-2.3965	0.925
Farm/Kidding Year Interaction	9	0	0
Farm/Kidding Year Interaction	10	0.0667	0.5922	0.1126	0.9104	-1.0941	1.2274
Farm/Kidding Year Interaction	11	0	0
Farm/Kidding Year Interaction	12	-0.3362	0.627	-0.5362	0.5918	-1.565	0.8927
Farm/Kidding Year Interaction	13	-1.2448	1.0204	-1.2199	0.2225	-3.2449	0.7553
Farm/Kidding Year Interaction	14	1.4868	0.3779	3.9339	< 0,0001	0.746	2.2276
Farm/Kidding Year Interaction	15	-0.0861	0.4268	-0.2018	0.8401	-0.9227	0.7505
Farm/Kidding Year Interaction	16	0	0
Farm/Kidding Year Interaction	17	0.4549	0.8353	0.5446	0.586	-1.1823	2.092
Farm/Kidding Year Interaction	18	0	0
Farm/Kidding Year Interaction	19	0.013	0.8992	0.0145	0.9885	-1.7494	1.7754
Farm/Kidding Year Interaction	20	0.0307	0.075	0.4088	0.6827	-0.1164	0.1777
Farm/Kidding Year Interaction	21	-0.1655	0.2502	-0.6615	0.5083	-0.6558	0.3248
Farm/Kidding Year Interaction	22	0.9388	0.0751	12.5088	< 0,0001	0.7917	1.0859
Farm/Kidding Year Interaction	23	0.9749	0.8403	1.1601	0.246	-0.6722	2.6219
Farm/Kidding Year Interaction	24	0.5645	0.1972	2.8619	0.0042	0.1779	0.9511
Farm/Kidding Year Interaction	25	-0.084	0.1407	-0.5972	0.5504	-0.3599	0.1918
Farm/Kidding Year Interaction	26	0.169	0.1908	0.8854	0.3759	-0.205	0.543
Farm/Kidding Year Interaction	27	-0.1204	0.5744	-0.2095	0.834	-1.2463	1.0055
Farm/Kidding Year Interaction	28	-0.151	0.6058	-0.2492	0.8032	-1.3384	1.0365
Farm/Kidding Year Interaction	29	0.0655	0.1631	0.4018	0.6878	-0.2542	0.3852
Farm/Kidding Year Interaction	30	0.9564	0.2251	4.249	< 0,0001	0.5152	1.3976
Farm/Kidding Year Interaction	31	0.8058	0.0929	8.6701	< 0,0001	0.6236	0.988
Farm/Kidding Year Interaction	32	0	0
Farm/Kidding Year Interaction	33	0.5931	0.1784	3.3242	0.0009	0.2434	0.9427
Farm/Kidding Year Interaction	34	-0.1171	0.5968	-0.1961	0.8445	-1.2868	1.0527
Farm/Kidding Year Interaction	35	0.6905	0.1358	5.0863	< 0,0001	0.4244	0.9566
Farm/Kidding Year Interaction	36	0.8656	0.1472	5.8813	< 0,0001	0.5772	1.1541
Farm/Kidding Year Interaction	37	-2.8476	0.6005	-4.7422	< 0,0001	-4.0246	-1.6707
Farm/Kidding Year Interaction	38	0.5172	0.5921	0.8736	0.3824	-0.6433	1.6777
Farm/Kidding Year Interaction	39	0.6119	0.833	0.7346	0.4626	-1.0207	2.2446
Farm/Kidding Year Interaction	40	1.3337	0.1067	12.4957	< 0,0001	1.1245	1.5429
Farm/Kidding Year Interaction	41	1.674	0.1864	8.9821	< 0,0001	1.3087	2.0394
Farm/Kidding Year Interaction	42	0.4509	0.1637	2.7544	0.0059	0.13	0.7717
Farm/Kidding Year Interaction	43	-0.1296	0.608	-0.2132	0.8312	-1.3212	1.062
Farm/Kidding Year Interaction	44	-0.8509	1.1773	-0.7228	0.4698	-3.1584	1.4566
Farm/Kidding Year Interaction	45	0.4807	0.1851	2.5979	0.0094	0.118	0.8435
Farm/Kidding Year Interaction	46	-0.3942	0.6127	-0.6433	0.5201	-1.5951	0.8068
Farm/Kidding Year Interaction	47	2.6356	1.0193	2.5858	0.0097	0.6378	4.6334
Farm/Kidding Year Interaction	48	0.1937	0.0899	2.1562	0.0311	0.0176	0.3698
Farm/Kidding Year Interaction	49	-0.4294	0.2548	-1.6851	0.092	-0.9289	0.07
Farm/Kidding Year Interaction	50	0.9695	0.1482	6.5436	< 0,0001	0.6791	1.2599
Farm/Kidding Year Interaction	51	0.3747	0.1516	2.4723	0.0134	0.0776	0.6717
Farm/Kidding Year Interaction	52	0.1203	0.1071	1.1241	0.261	-0.0895	0.3302
Farm/Kidding Year Interaction	53	-0.5042	0.4628	-1.0896	0.2759	-1.4112	0.4028
Farm/Kidding Year Interaction	54	0.5657	0.2378	2.3785	0.0174	0.0995	1.0319
Farm/Kidding Year Interaction	55	-0.0364	0.2546	-0.143	0.8863	-0.5355	0.4626
Farm/Kidding Year Interaction	56	0	0
Farm/Kidding Year Interaction	57	-0.644	0.1642	-3.9224	< 0,0001	-0.9658	-0.3222
Farm/Kidding Year Interaction	58	0.0691	0.1262	0.5474	0.5841	-0.1782	0.3164
Farm/Kidding Year Interaction	59	-0.1429	0.2826	-0.5056	0.6131	-0.6968	0.411
Farm/Kidding Year Interaction	60	-0.5033	0.1236	-4.071	< 0,0001	-0.7457	-0.261
Farm/Kidding Year Interaction	61	-0.0897	0.1048	-0.8562	0.3919	-0.2951	0.1156
Farm/Kidding Year Interaction	62	-1.2018	0.3832	-3.1359	0.0017	-1.9529	-0.4506
Farm/Kidding Year Interaction	63	0.0839	0.0838	1.0014	0.3166	-0.0803	0.248
Farm/Kidding Year Interaction	64	-0.5424	0.2254	-2.406	0.0161	-0.9843	-0.1005
Farm/Kidding Year Interaction	65	-0.1631	0.2308	-0.7067	0.4797	-0.6155	0.2893
Farm/Kidding Year Interaction	66	-0.4344	0.1473	-2.9496	0.0032	-0.723	-0.1457
Farm/Kidding Year Interaction	67	0	0
Farm/Kidding Year Interaction	68	0.5851	0.4239	1.3802	0.1675	-0.2458	1.4159
Farm/Kidding Year Interaction	69	-0.1978	0.4198	-0.4712	0.6375	-1.0207	0.6251
Farm/Kidding Year Interaction	70	1.1268	0.7213	1.562	0.1183	-0.2871	2.5406
Farm/Kidding Year Interaction	71	-0.148	0.0973	-1.5214	0.1282	-0.3388	0.0427
Farm/Kidding Year Interaction	72	0.4081	0.114	3.5803	0.0003	0.1847	0.6315
Farm/Kidding Year Interaction	73	0.2309	0.5925	0.3898	0.6967	-0.9303	1.3922
Farm/Kidding Year Interaction	74	-0.3729	0.1692	-2.2039	0.0275	-0.7046	-0.0413
Farm/Kidding Year Interaction	75	-0.9028	0.1458	-6.1922	< 0,0001	-1.1885	-0.617
Farm/Kidding Year Interaction	76	-1.3659	0.3955	-3.4532	0.0006	-2.1412	-0.5906
Farm/Kidding Year Interaction	77	0	0
Farm/Kidding Year Interaction	78	-0.22	0.0962	-2.2866	0.0222	-0.4085	-0.0314
Farm/Kidding Year Interaction	79	-0.1718	0.095	-1.8095	0.0704	-0.3579	0.0143
Farm/Kidding Year Interaction	80	0.8566	0.5981	1.4321	0.1521	-0.3158	2.0289
Farm/Kidding Year Interaction	81	0.6599	0.5971	1.1051	0.2691	-0.5105	1.8303
Farm/Kidding Year Interaction	82	-0.9242	1.0194	-0.9066	0.3646	-2.9222	1.0738
Farm/Kidding Year Interaction	83	0	0
Farm/Kidding Year Interaction	84	0.5461	0.158	3.4555	0.0005	0.2363	0.8558
Farm/Kidding Year Interaction	85	-0.2835	0.1854	-1.529	0.1263	-0.647	0.0799
Farm/Kidding Year Interaction	86	0	0
Farm/Kidding Year Interaction	87	0.2239	0.1974	1.1344	0.2566	-0.163	0.6109
Farm/Kidding Year Interaction	88	0.6555	0.2763	2.3728	0.0177	0.114	1.1969
Farm/Kidding Year Interaction	89	0.2215	0.1603	1.3813	0.1672	-0.0928	0.5357
Farm/Kidding Year Interaction	90	0.123	0.1452	0.8472	0.3969	-0.1616	0.4076
Farm/Kidding Year Interaction	91	0.2508	0.1468	1.7089	0.0875	-0.0369	0.5385
Farm/Kidding Year Interaction	92	0.2467	0.0677	3.6427	0.0003	0.114	0.3795
Farm/Kidding Year Interaction	93	-0.1348	0.0466	-2.8917	0.0038	-0.2262	-0.0434
Farm/Kidding Year Interaction	94	-1.5609	0.8362	-1.8668	0.0619	-3.1998	0.078
Farm/Kidding Year Interaction	95	0.256	0.5912	0.4331	0.665	-0.9027	1.4148
Farm/Kidding Year Interaction	96	0.3772	1.177	0.3205	0.7486	-1.9298	2.6842
Farm/Kidding Year Interaction	97	0.7905	0.5047	1.5662	0.1173	-0.1988	1.7798
Farm/Kidding Year Interaction	98	0.1272	0.1898	0.6704	0.5026	-0.2448	0.4993
Farm/Kidding Year Interaction	99	-0.1169	0.2857	-0.4093	0.6823	-0.6768	0.443
Farm/Kidding Year Interaction	100	-0.454	0.2855	-1.5902	0.1118	-1.0135	0.1056
Farm/Kidding Year Interaction	101	-0.6638	0.158	-4.2016	< 0,0001	-0.9735	-0.3542
Farm/Kidding Year Interaction	102	0.1147	0.1595	0.7189	0.4722	-0.1979	0.4272
Farm/Kidding Year Interaction	103	-0.054	0.1876	-0.288	0.7734	-0.4218	0.3138
Farm/Kidding Year Interaction	104	-1.0545	0.846	-1.2465	0.2126	-2.7126	0.6036
Farm/Kidding Year Interaction	105	-0.6124	0.117	-5.2347	< 0,0001	-0.8417	-0.3831
Farm/Kidding Year Interaction	106	-0.4082	0.1134	-3.6005	0.0003	-0.6304	-0.186
Farm/Kidding Year Interaction	107	-3.2905	0.8409	-3.9131	< 0,0001	-4.9387	-1.6423
Farm/Kidding Year Interaction	108	-0.2452	0.4918	-0.4985	0.6181	-1.2091	0.7188
Farm/Kidding Year Interaction	109	-0.5135	0.1123	-4.5709	< 0,0001	-0.7337	-0.2933
Farm/Kidding Year Interaction	110	-0.1477	0.0612	-2.4136	0.0158	-0.2677	-0.0278
Farm/Kidding Year Interaction	111	-1.7994	0.4858	-3.704	0.0002	-2.7515	-0.8472
Farm/Kidding Year Interaction	112	0.4023	0.1361	2.9557	0.0031	0.1355	0.669
Farm/Kidding Year Interaction	113	1.0568	0.3862	2.7362	0.0062	0.2998	1.8139
Farm/Kidding Year Interaction	114	0.1568	0.1062	1.476	0.1399	-0.0514	0.3649
Farm/Kidding Year Interaction	115	-0.2706	0.3092	-0.8752	0.3815	-0.8766	0.3354
Farm/Kidding Year Interaction	116	-0.1471	0.1323	-1.1118	0.2662	-0.4064	0.1122
Farm/Kidding Year Interaction	117	0.6583	0.8406	0.7831	0.4336	-0.9893	2.3058
Farm/Kidding Year Interaction	118	0.309	0.1665	1.8557	0.0635	-0.0174	0.6354
Farm/Kidding Year Interaction	119	0	0
Farm/Kidding Year Interaction	120	-0.724	0.1718	-4.2151	< 0,0001	-1.0607	-0.3874
Farm/Kidding Year Interaction	121	-3.6974	0.2816	-13.1298	< 0,0001	-4.2493	-3.1454
Farm/Kidding Year Interaction	122	-0.7553	0.1591	-4.7476	< 0,0001	-1.0671	-0.4435
Farm/Kidding Year Interaction	123	-2.2497	0.2124	-10.5934	< 0,0001	-2.6659	-1.8334
Farm/Kidding Year Interaction	124	-3.4048	0.2585	-13.1714	< 0,0001	-3.9115	-2.8982
Farm/Kidding Year Interaction	125	-4.1926	0.6179	-6.785	< 0,0001	-5.4038	-2.9815
Farm/Kidding Year Interaction	126	0.0154	0.3433	0.045	0.9641	-0.6574	0.6882
Farm/Kidding Year Interaction	127	0	0
Farm/Kidding Year Interaction	128	0.1568	0.1392	1.1266	0.2599	-0.116	0.4296
Farm/Kidding Year Interaction	129	-0.2996	0.195	-1.5364	0.1245	-0.6818	0.0826
Farm/Kidding Year Interaction	130	-0.3055	0.388	-0.7874	0.4311	-1.066	0.455
Farm/Kidding Year Interaction	131	0.2764	0.2	1.3822	0.1669	-0.1155	0.6683
Farm/Kidding Year Interaction	132	0.3076	0.1409	2.1829	0.029	0.0314	0.5837
Farm/Kidding Year Interaction	133	0.0293	0.1016	0.288	0.7734	-0.1699	0.2284
Farm/Kidding Year Interaction	134	-0.8489	0.961	-0.8833	0.3771	-2.7325	1.0347
Farm/Kidding Year Interaction	135	-0.1532	0.1498	-1.0228	0.3064	-0.4468	0.1404
Farm/Kidding Year Interaction	136	0	0
Farm/Kidding Year Interaction	137	-0.5407	0.1311	-4.1236	< 0,0001	-0.7977	-0.2837
Farm/Kidding Year Interaction	138	0.4202	0.1389	3.0251	0.0025	0.148	0.6925
Farm/Kidding Year Interaction	139	0.2758	0.2063	1.3366	0.1813	-0.1286	0.6801
Farm/Kidding Year Interaction	140	0.7537	0.163	4.6245	< 0,0001	0.4343	1.0731
Farm/Kidding Year Interaction	141	0	0
Farm/Kidding Year Interaction	142	-0.8342	0.2626	-3.1768	0.0015	-1.3488	-0.3195
Farm/Kidding Year Interaction	143	-0.3033	0.21	-1.4444	0.1486	-0.7148	0.1083
Farm/Kidding Year Interaction	144	-0.548	0.1718	-3.1904	0.0014	-0.8847	-0.2113
Farm/Kidding Year Interaction	145	0.1764	0.3311	0.5327	0.5942	-0.4726	0.8254
Farm/Kidding Year Interaction	146	0	0
Farm/Kidding Year Interaction	147	0.1971	0.2554	0.7716	0.4404	-0.3036	0.6978
Farm/Kidding Year Interaction	148	0.2752	0.1449	1.8994	0.0575	-0.0088	0.5592
Farm/Kidding Year Interaction	149	0.0062	0.1534	0.0406	0.9676	-0.2945	0.3069
Farm/Kidding Year Interaction	150	0.1881	0.2316	0.8122	0.4167	-0.2658	0.642
Farm/Kidding Year Interaction	151	0.2607	0.1507	1.7303	0.0836	-0.0346	0.556
Farm/Kidding Year Interaction	152	0.4241	0.192	2.2085	0.0272	0.0477	0.8005
Farm/Kidding Year Interaction	153	-0.8647	0.5921	-1.4602	0.1442	-2.0253	0.296
Farm/Kidding Year Interaction	154	-0.6273	0.8327	-0.7534	0.4512	-2.2594	1.0048
Farm/Kidding Year Interaction	155	-0.1697	0.1583	-1.0719	0.2838	-0.4801	0.1406
Farm/Kidding Year Interaction	156	-0.3077	0.1317	-2.3369	0.0194	-0.5658	-0.0496
Farm/Kidding Year Interaction	157	0.6373	0.5966	1.0684	0.2854	-0.5319	1.8066
Farm/Kidding Year Interaction	158	-0.362	0.335	-1.0803	0.28	-1.0186	0.2947
Farm/Kidding Year Interaction	159	-0.8458	0.8773	-0.9641	0.335	-2.5653	0.8737
Farm/Kidding Year Interaction	160	-0.6491	0.1077	-6.028	< 0,0001	-0.8601	-0.438
Farm/Kidding Year Interaction	161	-1.4278	0.4896	-2.9162	0.0035	-2.3874	-0.4681
Farm/Kidding Year Interaction	162	-0.428	0.0707	-6.0503	< 0,0001	-0.5666	-0.2893
Farm/Kidding Year Interaction	163	-0.5829	0.3022	-1.9291	0.0537	-1.1752	0.0093
Farm/Kidding Year Interaction	164	-2.2037	0.8363	-2.635	0.0084	-3.8428	-0.5645
Farm/Kidding Year Interaction	165	-0.1387	0.1491	-0.9306	0.3521	-0.4309	0.1535
Farm/Kidding Year Interaction	166	-0.0376	0.1481	-0.254	0.7995	-0.3279	0.2526
Farm/Kidding Year Interaction	167	-0.0688	0.1628	-0.4225	0.6726	-0.3879	0.2503
Farm/Kidding Year Interaction	168	-0.4634	0.1627	-2.8486	0.0044	-0.7822	-0.1445
Farm/Kidding Year Interaction	169	-0.1023	0.1637	-0.6251	0.5319	-0.4231	0.2185
Farm/Kidding Year Interaction	170	-0.2139	0.1899	-1.1259	0.2602	-0.5861	0.1584
Farm/Kidding Year Interaction	171	-0.1422	0.2185	-0.6506	0.5153	-0.5705	0.2861
Farm/Kidding Year Interaction	172	0.0749	0.0779	0.9623	0.3359	-0.0777	0.2275
Farm/Kidding Year Interaction	173	0.1632	0.1977	0.8253	0.4092	-0.2244	0.5507
Farm/Kidding Year Interaction	174	-0.0425	0.1445	-0.2939	0.7689	-0.3257	0.2408
Farm/Kidding Year Interaction	175	0.3834	0.1356	2.8267	0.0047	0.1175	0.6492
Farm/Kidding Year Interaction	176	0.1515	0.2427	0.6242	0.5325	-0.3241	0.6271
Farm/Kidding Year Interaction	177	-0.3064	0.1194	-2.565	0.0103	-0.5404	-0.0723
Farm/Kidding Year Interaction	178	0.5753	0.1239	4.6428	< 0,0001	0.3324	0.8182
Farm/Kidding Year Interaction	179	0.2816	0.0777	3.6219	0.0003	0.1292	0.4339
Farm/Kidding Year Interaction	180	0	0
Farm/Kidding Year Interaction	181	0	0
Farm/Kidding Year Interaction	182	0.0314	1.1769	0.0267	0.9787	-2.2754	2.3382
Farm/Kidding Year Interaction	183	-0.4731	0.2426	-1.9504	0.0511	-0.9486	0.0023
Farm/Kidding Year Interaction	184	-0.8954	0.4607	-1.9435	0.052	-1.7984	0.0076
Farm/Kidding Year Interaction	185	0.6532	0.1497	4.3625	< 0,0001	0.3597	0.9466
Farm/Kidding Year Interaction	186	0.4949	0.2376	2.0834	0.0372	0.0293	0.9606
Farm/Kidding Year Interaction	187	0.5457	0.1202	4.5383	< 0,0001	0.31	0.7813
Farm/Kidding Year Interaction	188	0.3071	0.1427	2.1516	0.0314	0.0273	0.5869
Farm/Kidding Year Interaction	189	-0.1739	0.4581	-0.3795	0.7043	-1.0718	0.724
Farm/Kidding Year Interaction	190	-0.0041	0.4195	-0.0098	0.9922	-0.8264	0.8181
Farm/Kidding Year Interaction	191	0.6773	0.5996	1.1297	0.2586	-0.4978	1.8525
Farm/Kidding Year Interaction	192	-0.1013	0.1228	-0.8248	0.4095	-0.3419	0.1394
Farm/Kidding Year Interaction	193	0.1471	0.091	1.6158	0.1061	-0.0313	0.3254
Farm/Kidding Year Interaction	194	-1.3853	0.4871	-2.8443	0.0045	-2.34	-0.4307
Farm/Kidding Year Interaction	195	-0.0922	0.1763	-0.5232	0.6008	-0.4378	0.2533
Farm/Kidding Year Interaction	196	-0.2667	0.2334	-1.1428	0.2531	-0.7241	0.1907
Farm/Kidding Year Interaction	197	0.4016	0.102	3.9355	< 0,0001	0.2016	0.6016
Farm/Kidding Year Interaction	198	0.5075	0.3262	1.5557	0.1198	-0.1319	1.1468
Farm/Kidding Year Interaction	199	-1.2769	0.4492	-2.8425	0.0045	-2.1573	-0.3964
Farm/Kidding Year Interaction	200	0.267	0.0891	2.9963	0.0027	0.0923	0.4417
Farm/Kidding Year Interaction	201	0.3698	0.1597	2.3157	0.0206	0.0568	0.6828
Farm/Kidding Year Interaction	202	0	0
Farm/Kidding Year Interaction	203	0.7494	0.1726	4.3427	< 0,0001	0.4112	1.0877
Farm/Kidding Year Interaction	204	-0.0595	0.0822	-0.7245	0.4688	-0.2206	0.1015
Farm/Kidding Year Interaction	205	0	0
Farm/Kidding Year Interaction	206	-0.0114	0.5913	-0.0193	0.9846	-1.1705	1.1476
Farm/Kidding Year Interaction	207	0	0
Farm/Kidding Year Interaction	208	0	0
Farm/Kidding Year Interaction	209	-0.6366	0.1808	-3.5205	0.0004	-0.991	-0.2822
Farm/Kidding Year Interaction	210	-0.0017	0.1302	-0.0129	0.9897	-0.2568	0.2534
Farm/Kidding Year Interaction	211	-0.8118	0.3886	-2.089	0.0367	-1.5735	-0.0501
Farm/Kidding Year Interaction	212	0.1078	0.0867	1.2441	0.2135	-0.0621	0.2777
Farm/Kidding Year Interaction	213	-0.3691	0.4838	-0.7629	0.4455	-1.3174	0.5792
Farm/Kidding Year Interaction	214	0.3555	0.0985	3.6087	0.0003	0.1624	0.5485
Farm/Kidding Year Interaction	215	0.4327	0.4884	0.8861	0.3756	-0.5245	1.3899
Farm/Kidding Year Interaction	216	-1.353	0.8414	-1.608	0.1079	-3.0022	0.2962
Farm/Kidding Year Interaction	217	0.2927	0.1092	2.6807	0.0074	0.0787	0.5068
Farm/Kidding Year Interaction	218	-1.1798	0.8385	-1.4071	0.1594	-2.8232	0.4636
Farm/Kidding Year Interaction	219	0.0412	0.1151	0.3581	0.7202	-0.1844	0.2669
Farm/Kidding Year Interaction	220	0.1575	0.3847	0.4093	0.6823	-0.5965	0.9114
Farm/Kidding Year Interaction	221	0.4807	0.1152	4.1727	< 0,0001	0.2549	0.7065
Farm/Kidding Year Interaction	222	0.3043	0.0802	3.7962	0.0001	0.1472	0.4614
Farm/Kidding Year Interaction	223	-0.0989	0.1481	-0.6678	0.5043	-0.3892	0.1914
Farm/Kidding Year Interaction	224	0.0056	0.1214	0.0459	0.9634	-0.2324	0.2435
Farm/Kidding Year Interaction	225	0.2994	0.0793	3.7748	0.0002	0.144	0.4549
Farm/Kidding Year Interaction	226	0.0089	0.1039	0.0857	0.9317	-0.1948	0.2126
Farm/Kidding Year Interaction	227	0.2939	0.1252	2.3482	0.0189	0.0486	0.5393
Farm/Kidding Year Interaction	228	-0.0015	0.1974	-0.0078	0.9938	-0.3885	0.3854
Farm/Kidding Year Interaction	229	0.2792	0.1348	2.0709	0.0384	0.015	0.5435
Farm/Kidding Year Interaction	230	0.4312	0.1996	2.1605	0.0307	0.04	0.8224
Farm/Kidding Year Interaction	231	0.083	0.1071	0.7743	0.4387	-0.127	0.2929
Farm/Kidding Year Interaction	232	0.6339	0.1317	4.814	< 0,0001	0.3758	0.892
Farm/Kidding Year Interaction	233	-0.0655	0.1247	-0.5256	0.5991	-0.31	0.1789
Farm/Kidding Year Interaction	234	-0.0016	0.0909	-0.0176	0.9859	-0.1797	0.1765
Farm/Kidding Year Interaction	235	0.2463	0.2816	0.8749	0.3816	-0.3055	0.7982
Farm/Kidding Year Interaction	236	0.5105	0.2461	2.0741	0.0381	0.0281	0.993
Farm/Kidding Year Interaction	237	0.4263	0.2029	2.1011	0.0356	0.0286	0.8239
Farm/Kidding Year Interaction	238	0.0909	0.2008	0.4526	0.6509	-0.3027	0.4845
Farm/Kidding Year Interaction	239	0.2476	0.108	2.2929	0.0219	0.036	0.4593
Farm/Kidding Year Interaction	240	-0.3836	0.5977	-0.6417	0.521	-1.555	0.7879
Farm/Kidding Year Interaction	241	0.0767	0.145	0.5289	0.5969	-0.2076	0.361
Farm/Kidding Year Interaction	242	0.6489	0.0644	10.0829	< 0,0001	0.5228	0.7751
Farm/Kidding Year Interaction	243	0.231	0.0442	5.2237	< 0,0001	0.1444	0.3177
Farm/Kidding Year Interaction	244	0.4388	0.2361	1.8591	0.063	-0.0238	0.9015
Farm/Kidding Year Interaction	245	-0.4074	0.421	-0.9677	0.3332	-1.2325	0.4177
Farm/Kidding Year Interaction	246	0	0
Farm/Kidding Year Interaction	247	0.6972	0.165	4.2243	< 0,0001	0.3737	1.0206
Farm/Kidding Year Interaction	248	0.0997	0.1801	0.5537	0.5798	-0.2533	0.4528
Farm/Kidding Year Interaction	249	0.5522	0.1569	3.5201	0.0004	0.2447	0.8596
Farm/Kidding Year Interaction	250	-0.3742	0.1406	-2.6617	0.0078	-0.6497	-0.0986
Farm/Kidding Year Interaction	251	0.603	0.1455	4.1445	< 0,0001	0.3178	0.8882
Farm/Kidding Year Interaction	252	0.771	0.2248	3.4303	0.0006	0.3305	1.2115
Farm/Kidding Year Interaction	253	0.2275	0.2054	1.1074	0.2681	-0.1751	0.6301
Farm/Kidding Year Interaction	254	-0.6227	0.1759	-3.54	0.0004	-0.9675	-0.2779
Farm/Kidding Year Interaction	255	0.2901	0.1417	2.0476	0.0406	0.0124	0.5678
Farm/Kidding Year Interaction	256	0.6986	0.3188	2.1913	0.0284	0.0737	1.3234
Farm/Kidding Year Interaction	257	1.3902	0.8379	1.6591	0.0971	-0.2521	3.0325
Farm/Kidding Year Interaction	258	1.0723	0.8502	1.2612	0.2072	-0.5941	2.7387
Farm/Kidding Year Interaction	259	0.3435	0.9616	0.3573	0.7209	-1.5412	2.2283
Farm/Kidding Year Interaction	260	0	0
Farm/Kidding Year Interaction	261	0.1668	0.0792	2.1067	0.0351	0.0116	0.322
Farm/Kidding Year Interaction	262	-0.0999	0.1356	-0.737	0.4611	-0.3657	0.1658
Farm/Kidding Year Interaction	263	-1.355	0.3841	-3.5279	0.0004	-2.1077	-0.6022
Farm/Kidding Year Interaction	264	-0.4096	0.1144	-3.5811	0.0003	-0.6338	-0.1854
Farm/Kidding Year Interaction	265	-0.8564	0.4305	-1.9896	0.0466	-1.7001	-0.0127
Farm/Kidding Year Interaction	266	-0.5452	0.1313	-4.1527	< 0,0001	-0.8025	-0.2879
Farm/Kidding Year Interaction	267	0.3086	0.2457	1.2558	0.2092	-0.173	0.7902
Farm/Kidding Year Interaction	268	0.2532	0.1242	2.0392	0.0414	0.0098	0.4966
Farm/Kidding Year Interaction	269	-0.0518	0.155	-0.3343	0.7381	-0.3555	0.2519
Farm/Kidding Year Interaction	270	0.0082	0.0884	0.0923	0.9265	-0.1651	0.1815
Farm/Kidding Year Interaction	271	-0.0026	0.0842	-0.0313	0.975	-0.1677	0.1624
Farm/Kidding Year Interaction	272	-0.3661	0.0526	-6.9556	< 0,0001	-0.4693	-0.2629
Farm/Kidding Year Interaction	273	0.2822	0.1898	1.4869	0.137	-0.0898	0.6542
Farm/Kidding Year Interaction	274	-0.1577	0.0761	-2.0721	0.0383	-0.3068	-0.0085
Farm/Kidding Year Interaction	275	-0.0374	0.0855	-0.4378	0.6616	-0.2049	0.1301
Farm/Kidding Year Interaction	276	-0.151	0.1367	-1.1042	0.2695	-0.419	0.117
Farm/Kidding Year Interaction	277	-0.1476	0.1709	-0.8634	0.3879	-0.4826	0.1874
Farm/Kidding Year Interaction	278	-0.1324	0.1226	-1.0796	0.2803	-0.3727	0.108
Farm/Kidding Year Interaction	279	-0.2221	0.1159	-1.9151	0.0555	-0.4493	0.0052
Farm/Kidding Year Interaction	280	-0.2754	0.4911	-0.5607	0.575	-1.238	0.6873
Farm/Kidding Year Interaction	281	-1.5185	0.8396	-1.8085	0.0705	-3.1642	0.1272
Farm/Kidding Year Interaction	282	-0.4299	0.2575	-1.6695	0.095	-0.9346	0.0748
Farm/Kidding Year Interaction	283	0.0502	0.5944	0.0845	0.9327	-1.1147	1.2151
Farm/Kidding Year Interaction	284	0	0
Farm/Kidding Year Interaction	285	-0.7427	0.5931	-1.2524	0.2104	-1.9051	0.4197
Farm/Kidding Year Interaction	286	-0.398	0.1176	-3.3839	0.0007	-0.6285	-0.1675
Farm/Kidding Year Interaction	287	0	0
Farm/Kidding Year Interaction	288	-0.5156	0.1752	-2.9423	0.0033	-0.8591	-0.1721
Farm/Kidding Year Interaction	289	-0.2026	0.1553	-1.305	0.1919	-0.507	0.1017
Farm/Kidding Year Interaction	290	0.1025	0.1142	0.8976	0.3694	-0.1214	0.3265
Farm/Kidding Year Interaction	291	0	0
Farm/Kidding Year Interaction	292	0.3435	0.2303	1.4915	0.1358	-0.1079	0.7948
Farm/Kidding Year Interaction	293	-0.0166	0.0995	-0.1668	0.8676	-0.2115	0.1784
Farm/Kidding Year Interaction	294	-0.1168	0.1055	-1.1067	0.2684	-0.3236	0.09
Farm/Kidding Year Interaction	295	0.4302	0.1629	2.6414	0.0083	0.111	0.7494
Farm/Kidding Year Interaction	296	0	0
Farm/Kidding Year Interaction	297	0	0
Farm/Kidding Year Interaction	298	-0.293	0.211	-1.389	0.1648	-0.7066	0.1205
Farm/Kidding Year Interaction	299	-0.3811	0.1096	-3.4786	0.0005	-0.5959	-0.1664
Farm/Kidding Year Interaction	300	-0.304	0.1669	-1.8207	0.0687	-0.6312	0.0233
Farm/Kidding Year Interaction	301	0.5352	0.1636	3.2707	0.0011	0.2145	0.8559
Farm/Kidding Year Interaction	302	-0.3035	0.2016	-1.5052	0.1323	-0.6986	0.0917
Farm/Kidding Year Interaction	303	0.0145	0.0973	0.1487	0.8818	-0.1762	0.2052
Farm/Kidding Year Interaction	304	-0.1002	0.0695	-1.4428	0.1491	-0.2363	0.0359
Farm/Kidding Year Interaction	305	-0.4249	0.247	-1.7199	0.0855	-0.909	0.0593
Farm/Kidding Year Interaction	306	-0.1019	0.0489	-2.0816	0.0374	-0.1978	-0.0059
Farm/Kidding Year Interaction	307	-0.0637	0.0798	-0.7987	0.4245	-0.2201	0.0927
Farm/Kidding Year Interaction	308	-0.4448	0.1403	-3.1705	0.0015	-0.7198	-0.1698
Farm/Kidding Year Interaction	309	-0.0013	0.1112	-0.0114	0.9909	-0.2193	0.2167
Farm/Kidding Year Interaction	310	0.1239	0.243	0.5098	0.6102	-0.3524	0.6001
Farm/Kidding Year Interaction	311	0.2428	0.2489	0.9751	0.3295	-0.2452	0.7307
Farm/Kidding Year Interaction	312	-0.468	0.1633	-2.8664	0.0042	-0.7881	-0.148
Farm/Kidding Year Interaction	313	-0.2044	0.1328	-1.5394	0.1237	-0.4647	0.0559
Farm/Kidding Year Interaction	314	-0.0155	0.0928	-0.1666	0.8677	-0.1973	0.1664
Farm/Kidding Year Interaction	315	-0.4079	0.1215	-3.3585	0.0008	-0.6459	-0.1698
Farm/Kidding Year Interaction	316	0.2702	0.1029	2.6246	0.0087	0.0684	0.4719
Farm/Kidding Year Interaction	317	-0.2018	0.1066	-1.8938	0.0583	-0.4106	0.0071
Farm/Kidding Year Interaction	318	0	0
Farm/Kidding Year Interaction	319	0.505	0.348	1.4513	0.1467	-0.177	1.187
Farm/Kidding Year Interaction	320	0.2319	0.3527	0.6575	0.5109	-0.4594	0.9231
Farm/Kidding Year Interaction	321	0	0
Farm/Kidding Year Interaction	322	-0.0592	0.1762	-0.3357	0.7371	-0.4045	0.2862
Farm/Kidding Year Interaction	323	0.0532	0.2066	0.2576	0.7967	-0.3518	0.4583
Farm/Kidding Year Interaction	324	0	0
Farm/Kidding Year Interaction	325	-0.6386	0.5908	-1.0809	0.2797	-1.7966	0.5194
Farm/Kidding Year Interaction	326	-0.2982	0.0881	-3.3838	0.0007	-0.4709	-0.1254
Farm/Kidding Year Interaction	327	0.2579	0.1499	1.7206	0.0853	-0.0359	0.5516
Farm/Kidding Year Interaction	328	-1.0947	0.2599	-4.2112	< 0,0001	-1.6042	-0.5852
Farm/Kidding Year Interaction	329	-0.041	0.0784	-0.5227	0.6012	-0.1946	0.1127
Farm/Kidding Year Interaction	330	-0.0947	0.123	-0.7701	0.4413	-0.3358	0.1464
Farm/Kidding Year Interaction	331	0.0269	0.0873	0.3082	0.758	-0.1443	0.1981
Farm/Kidding Year Interaction	332	-0.1189	0.1857	-0.6401	0.5221	-0.4828	0.2451
Farm/Kidding Year Interaction	333	0.1396	0.091	1.5346	0.1249	-0.0387	0.3179
Farm/Kidding Year Interaction	334	0	0
Farm/Kidding Year Interaction	335	0.3468	0.149	2.3277	0.0199	0.0548	0.6388
Farm/Kidding Year Interaction	336	-0.4164	0.1515	-2.7477	0.006	-0.7134	-0.1194
Farm/Kidding Year Interaction	337	0.1395	0.1107	1.2606	0.2075	-0.0774	0.3565
Farm/Kidding Year Interaction	338	0.0627	0.1266	0.495	0.6206	-0.1855	0.3108
Farm/Kidding Year Interaction	339	0.0768	0.2271	0.3384	0.7351	-0.3683	0.522
Farm/Kidding Year Interaction	340	-1.0803	0.2737	-3.9466	< 0,0001	-1.6169	-0.5438
Farm/Kidding Year Interaction	341	0.2472	0.1603	1.5417	0.1232	-0.0671	0.5615
Farm/Kidding Year Interaction	342	0.04	0.1213	0.3294	0.7418	-0.1978	0.2777
Farm/Kidding Year Interaction	343	-0.2905	0.1285	-2.2611	0.0238	-0.5423	-0.0387
Farm/Kidding Year Interaction	344	-0.149	0.3079	-0.4838	0.6285	-0.7524	0.4545
Farm/Kidding Year Interaction	345	-0.9158	0.3289	-2.7848	0.0054	-1.5604	-0.2712
Farm/Kidding Year Interaction	346	-0.8354	0.2841	-2.9402	0.0033	-1.3923	-0.2785
Farm/Kidding Year Interaction	347	-0.0782	0.1289	-0.6069	0.5439	-0.3309	0.1744
Farm/Kidding Year Interaction	348	-0.0111	0.128	-0.087	0.9306	-0.2619	0.2397
Farm/Kidding Year Interaction	349	0.0015	0.1053	0.0141	0.9888	-0.205	0.208
Farm/Kidding Year Interaction	350	0.2223	0.2688	0.8271	0.4082	-0.3046	0.7492
Farm/Kidding Year Interaction	351	0.7838	0.3127	2.5067	0.0122	0.1709	1.3967
Farm/Kidding Year Interaction	352	0.4652	0.6011	0.7739	0.439	-0.713	1.6433
Farm/Kidding Year Interaction	353	0	0
Farm/Kidding Year Interaction	354	0	0
Farm/Kidding Year Interaction	355	-0.2604	0.2332	-1.1166	0.2642	-0.7176	0.1967
Farm/Kidding Year Interaction	356	0	0
Farm/Kidding Year Interaction	357	0	0
Farm/Kidding Year Interaction	358	0	0
Farm/Kidding Year Interaction	359	0.3775	0.5969	0.6324	0.5272	-0.7925	1.5474
Farm/Kidding Year Interaction	360	0	0
Farm/Kidding Year Interaction	361	0	0
Farm/Kidding Year Interaction	362	-0.2267	0.1914	-1.1849	0.2361	-0.6018	0.1483
Farm/Kidding Year Interaction	363	0	0
Farm/Kidding Year Interaction	364	0	0
Farm/Kidding Year Interaction	365	0	0
Farm/Kidding Year Interaction	366	0	0
Farm/Kidding Year Interaction	367	0	0
Farm/Kidding Year Interaction	368	0	0
Farm/Kidding Year Interaction	369	0	0
Farm/Kidding Year Interaction	370	-0.3594	0.3834	-0.9375	0.3485	-1.1108	0.392
Farm/Kidding Year Interaction	371	0	0
Farm/Kidding Year Interaction	372	0	0
Farm/Kidding Year Interaction	373	0	0
Farm/Kidding Year Interaction	374	0	0
Farm/Kidding Year Interaction	375	0	0
Farm/Kidding Year Interaction	376	0	0
Farm/Kidding Year Interaction	377	0	0
Farm/Kidding Year Interaction	378	0	0
Farm/Kidding Year Interaction	379	0	0
Farm/Kidding Year Interaction	380	0	0
Farm/Kidding Year Interaction	381	0	0
Farm/Kidding Year Interaction	382	0	0
Farm/Kidding Year Interaction	383	0	0
Farm/Kidding Year Interaction	384	0	0
Farm/Kidding Year Interaction	385	0	0
Farm/Kidding Year Interaction	386	0.1664	0.6001	0.2774	0.7815	-1.0098	1.3427
Farm/Kidding Year Interaction	387	0	0
Farm/Kidding Year Interaction	388	0	0
Farm/Kidding Year Interaction	389	0	0
Farm/Kidding Year Interaction	390	-0.28	0.1668	-1.679	0.0932	-0.6068	0.0469
Farm/Kidding Year Interaction	391	0	0
Farm/Kidding Year Interaction	392	0	0
Farm/Kidding Year Interaction	393	0	0
Farm/Kidding Year Interaction	394	0	0
Farm/Kidding Year Interaction	395	0	0
Farm/Kidding Year Interaction	396	0	0
Farm/Kidding Year Interaction	397	0	0
Farm/Kidding Year Interaction	398	-0.3743	0.2767	-1.3529	0.1761	-0.9166	0.168
Farm/Kidding Year Interaction	399	0	0
Farm/Kidding Year Interaction	400	0.1951	0.4865	0.401	0.6884	-0.7584	1.1486
Farm/Kidding Year Interaction	401	0	0
Farm/Kidding Year Interaction	402	0	0
Farm/Kidding Year Interaction	403	0	0
Farm/Kidding Year Interaction	404	0	0
Farm/Kidding Year Interaction	405	0	0
Farm/Kidding Year Interaction	406	0	0
Farm/Kidding Year Interaction	407	0	0
Farm/Kidding Year Interaction	408	0	0
Farm/Kidding Year Interaction	409	0	0
Farm/Kidding Year Interaction	410	0	0
Farm/Kidding Year Interaction	411	0	0
Farm/Kidding Year Interaction	412	0	0
Farm/Kidding Year Interaction	413	0	0
Farm/Kidding Year Interaction	414	0	0
Farm/Kidding Year Interaction	415	0	0
Farm/Kidding Year Interaction	416	0	0
Farm/Kidding Year Interaction	417	0	0
Farm/Kidding Year Interaction	418	0	0
Farm/Kidding Year Interaction	419	0	0
Farm/Kidding Year Interaction	420	0	0
Farm/Kidding Year Interaction	421	0	0
Farm/Kidding Year Interaction	422	0	0
Farm/Kidding Year Interaction	423	0	0
Farm/Kidding Year Interaction	424	0	0
Farm/Kidding Year Interaction	425	0	0
Farm/Kidding Year Interaction	426	0	0
Farm/Kidding Year Interaction	427	0	0
Farm/Kidding Year Interaction	428	0	0
Farm/Kidding Year Interaction	429	0	0
Farm/Kidding Year Interaction	430	0	0
Farm/Kidding Year Interaction	431	0	0
Farm/Kidding Year Interaction	432	0	0
Farm/Kidding Year Interaction	433	0	0
Farm/Kidding Year Interaction	434	0	0
Farm/Kidding Year Interaction	435	0	0
Farm/Kidding Year Interaction	436	0	0
Farm/Kidding Year Interaction	437	0	0
Farm/Kidding Year Interaction	438	0	0
Farm/Kidding Year Interaction	439	0	0
Farm/Kidding Year Interaction	440	0	0
Farm/Kidding Year Interaction	441	0	0
Farm/Kidding Year Interaction	442	0	0
Farm/Kidding Year Interaction	443	0	0
Farm/Kidding Year Interaction	444	0	0
Farm/Kidding Year Interaction	445	0	0
Farm/Kidding Year Interaction	446	0	0
Farm/Kidding Year Interaction	447	0	0
Farm/Kidding Year Interaction	448	0	0
Farm/Kidding Year Interaction	449	0	0
Farm/Kidding Year Interaction	450	0	0
Farm/Kidding Year Interaction	451	0	0
Farm/Kidding Year Interaction	452	0	0
Farm/Kidding Year Interaction	453	0	0
Farm/Kidding Year Interaction	454	0	0
Farm/Kidding Year Interaction	455	0	0
Farm/Kidding Year Interaction	456	0	0
Farm/Kidding Year Interaction	457	0	0
Farm/Kidding Year Interaction	458	0	0
Farm/Kidding Year Interaction	459	0	0
Farm/Kidding Year Interaction	460	0	0
Farm/Kidding Year Interaction	461	0	0
Farm/Kidding Year Interaction	462	0	0
Farm/Kidding Year Interaction	463	0	0
Farm/Kidding Year Interaction	464	0	0
Farm/Kidding Year Interaction	465	0	0
Farm/Kidding Year Interaction	466	0	0
Farm/Kidding Year Interaction	467	0	0
Farm/Kidding Year Interaction	468	0	0
Farm/Kidding Year Interaction	469	0	0
Farm/Kidding Year Interaction	470	0	0
Farm/Kidding Year Interaction	471	0	0
Farm/Kidding Year Interaction	472	0	0
Farm/Kidding Year Interaction	473	0	0
Farm/Kidding Year Interaction	474	0	0
Farm/Kidding Year Interaction	475	0	0
Farm/Kidding Year Interaction	476	0	0

[truncated: 8 more sheets: Median Suspensor Ligament, Udder Width, Udder Depth, Niple Placement, Nipple Diameter, Rear Legs Rear View, Rear Legs Side View, Mobility]
