# Supplementary material for: Analysis of the Genetic Parameters for Dairy Linear Appraisal and Zoometric Traits: A Tool to Enhance the Applicability of Murciano-Granadina Goats Major Areas Evaluation System
Source: Animals (Basel). 2023 Mar 21;13(6):1114. doi: 10.3390/ani13061114 (PMC10044043; doi:10.3390/ani13061114)
Supplement: Supplementary file 1 [file animals-13-01114-s001.zip › Table S4.xlsx]

## Sheet: Hoja1
Title	Analysis of the Genetic Parameters for Dairy Linear Appraisal and Zoometric Traits: A Tool to Enhance the Applicability of Murciano-Granadina goats Major Areas Evaluation System
Journal	Animals
Authors	Javier Fernández Álvarez, Francisco Javier Navas González, Jose Manuel León Jurado, Carlos Iglesias Pastrana and Juan Vicente Delgado Bermejo
Table S4.	Best linear estimators (BLUES) for fixed effects and covariates for zoometric and LAS traits in Murciano-Granadina goats and bucks.

## Sheet: BLUES
Order	Value	Level Name	Factor/Covariate	Variable
1	0.250589	COVARIATE REGRESSION COEFFICIENT	AGE 1	Rump Width
2	-0.037629	COVARIATE REGRESSION COEFFICIENT	AGE 2	Rump Width
3	0.00220612	COVARIATE REGRESSION COEFFICIENT	DAYS IN MILK	Rump Width
4	-0.0628504	COVARIATE REGRESSION COEFFICIENT	AGE 1	Rear Insertion Height
5	0.0154766	COVARIATE REGRESSION COEFFICIENT	AGE 2	Rear Insertion Height
6	-0.0020814	COVARIATE REGRESSION COEFFICIENT	DAYS IN MILK	Rear Insertion Height
7	-0.14327	1	FARM	Rump Width
8	0.464308	2	FARM	Rump Width
9	0	3	FARM	Rump Width
10	0.695387	4	FARM	Rump Width
11	-0.00094687	5	FARM	Rump Width
12	1.08767	6	FARM	Rump Width
13	0	7	FARM	Rump Width
14	-0.227474	8	FARM	Rump Width
15	0.413175	9	FARM	Rump Width
16	-0.212939	10	FARM	Rump Width
17	1.12089	13	FARM	Rump Width
18	0	14	FARM	Rump Width
19	-0.493327	15	FARM	Rump Width
20	0	16	FARM	Rump Width
21	0.522808	17	FARM	Rump Width
22	-0.0328229	18	FARM	Rump Width
23	0.0545777	19	FARM	Rump Width
24	0.879524	20	FARM	Rump Width
25	0.601424	21	FARM	Rump Width
26	0.132388	23	FARM	Rump Width
27	0.316476	24	FARM	Rump Width
28	0.68389	25	FARM	Rump Width
29	0	26	FARM	Rump Width
30	0.93378	27	FARM	Rump Width
31	0.909817	28	FARM	Rump Width
32	0.907439	29	FARM	Rump Width
33	0	30	FARM	Rump Width
34	-0.162483	31	FARM	Rump Width
35	0.661399	32	FARM	Rump Width
36	0	33	FARM	Rump Width
37	0.657535	34	FARM	Rump Width
38	0.58854	35	FARM	Rump Width
39	0.426289	36	FARM	Rump Width
40	0	38	FARM	Rump Width
41	0.0700457	39	FARM	Rump Width
42	1.21507	40	FARM	Rump Width
43	0.224713	41	FARM	Rump Width
44	0.149147	42	FARM	Rump Width
45	-0.757331	43	FARM	Rump Width
46	0.169611	44	FARM	Rump Width
47	0.290367	45	FARM	Rump Width
48	0.504175	48	FARM	Rump Width
49	0	49	FARM	Rump Width
50	0	50	FARM	Rump Width
51	0.397032	51	FARM	Rump Width
52	0.468456	52	FARM	Rump Width
53	0.357839	53	FARM	Rump Width
54	0.546222	54	FARM	Rump Width
55	0.0592631	55	FARM	Rump Width
56	0.54536	56	FARM	Rump Width
57	1.13795	57	FARM	Rump Width
58	-0.188672	58	FARM	Rump Width
59	0.380684	59	FARM	Rump Width
60	-0.400949	60	FARM	Rump Width
61	0.848152	61	FARM	Rump Width
62	0.926973	62	FARM	Rump Width
63	0.296652	63	FARM	Rump Width
64	0.232738	64	FARM	Rump Width
65	0.639973	65	FARM	Rump Width
66	0.828036	66	FARM	Rump Width
67	0.816445	68	FARM	Rump Width
68	-0.71406	69	FARM	Rump Width
69	0	70	FARM	Rump Width
70	0	71	FARM	Rump Width
71	-1.08053	73	FARM	Rump Width
72	0	74	FARM	Rump Width
73	0.0520081	75	FARM	Rump Width
74	0.360638	76	FARM	Rump Width
75	0.331564	78	FARM	Rump Width
76	0.0373484	79	FARM	Rump Width
77	-1.54021	80	FARM	Rump Width
78	-0.126348	81	FARM	Rump Width
79	0	82	FARM	Rump Width
80	0	83	FARM	Rump Width
81	0.49696	84	FARM	Rump Width
82	0.342128	85	FARM	Rump Width
83	-0.174865	1	LACTATION STAGE	Rump Width
84	0	2	LACTATION STAGE	Rump Width
85	-0.217279	1	KIDDING MONTH	Rump Width
86	-0.250391	2	KIDDING MONTH	Rump Width
87	-0.273778	3	KIDDING MONTH	Rump Width
88	-0.18648	4	KIDDING MONTH	Rump Width
89	-0.190402	5	KIDDING MONTH	Rump Width
90	-0.11853	6	KIDDING MONTH	Rump Width
91	-0.0570352	7	KIDDING MONTH	Rump Width
92	-0.0123464	8	KIDDING MONTH	Rump Width
93	-0.0488157	9	KIDDING MONTH	Rump Width
94	-0.053846	10	KIDDING MONTH	Rump Width
95	-0.0540602	11	KIDDING MONTH	Rump Width
96	0	12	KIDDING MONTH	Rump Width
97	0	1	INTERACTION FARM/KIDDING YEAR	Rump Width
98	0	2	INTERACTION FARM/KIDDING YEAR	Rump Width
99	0.303163	3	INTERACTION FARM/KIDDING YEAR	Rump Width
100	-1.22741	4	INTERACTION FARM/KIDDING YEAR	Rump Width
101	-1.86874	5	INTERACTION FARM/KIDDING YEAR	Rump Width
102	0.541835	7	INTERACTION FARM/KIDDING YEAR	Rump Width
103	-2.92362	8	INTERACTION FARM/KIDDING YEAR	Rump Width
104	-4.9468	9	INTERACTION FARM/KIDDING YEAR	Rump Width
105	-1.16396	10	INTERACTION FARM/KIDDING YEAR	Rump Width
106	0	11	INTERACTION FARM/KIDDING YEAR	Rump Width
107	-1.97832	12	INTERACTION FARM/KIDDING YEAR	Rump Width
108	-3.79928	13	INTERACTION FARM/KIDDING YEAR	Rump Width
109	0.264945	14	INTERACTION FARM/KIDDING YEAR	Rump Width
110	-0.215811	15	INTERACTION FARM/KIDDING YEAR	Rump Width
111	0	16	INTERACTION FARM/KIDDING YEAR	Rump Width
112	-1.86913	17	INTERACTION FARM/KIDDING YEAR	Rump Width
113	0	18	INTERACTION FARM/KIDDING YEAR	Rump Width
114	-0.533982	19	INTERACTION FARM/KIDDING YEAR	Rump Width
115	0	20	INTERACTION FARM/KIDDING YEAR	Rump Width
116	-0.496901	21	INTERACTION FARM/KIDDING YEAR	Rump Width
117	-0.225131	22	INTERACTION FARM/KIDDING YEAR	Rump Width
118	0	23	INTERACTION FARM/KIDDING YEAR	Rump Width
119	-0.687422	24	INTERACTION FARM/KIDDING YEAR	Rump Width
120	-0.750989	25	INTERACTION FARM/KIDDING YEAR	Rump Width
121	-1.31602	26	INTERACTION FARM/KIDDING YEAR	Rump Width
122	0.230735	27	INTERACTION FARM/KIDDING YEAR	Rump Width
123	-1.63103	28	INTERACTION FARM/KIDDING YEAR	Rump Width
124	-0.379594	29	INTERACTION FARM/KIDDING YEAR	Rump Width
125	-0.654041	30	INTERACTION FARM/KIDDING YEAR	Rump Width
126	-0.600589	31	INTERACTION FARM/KIDDING YEAR	Rump Width
127	0	32	INTERACTION FARM/KIDDING YEAR	Rump Width
128	-1.25406	33	INTERACTION FARM/KIDDING YEAR	Rump Width
129	-2.02351	34	INTERACTION FARM/KIDDING YEAR	Rump Width
130	0.315298	35	INTERACTION FARM/KIDDING YEAR	Rump Width
131	0.615262	36	INTERACTION FARM/KIDDING YEAR	Rump Width
132	-1.27884	37	INTERACTION FARM/KIDDING YEAR	Rump Width
133	-0.384427	38	INTERACTION FARM/KIDDING YEAR	Rump Width
134	-1.04566	39	INTERACTION FARM/KIDDING YEAR	Rump Width
135	-0.708171	40	INTERACTION FARM/KIDDING YEAR	Rump Width
136	-0.979939	41	INTERACTION FARM/KIDDING YEAR	Rump Width
137	0.122207	42	INTERACTION FARM/KIDDING YEAR	Rump Width
138	-0.522279	43	INTERACTION FARM/KIDDING YEAR	Rump Width
139	-0.929144	44	INTERACTION FARM/KIDDING YEAR	Rump Width
140	0.343871	45	INTERACTION FARM/KIDDING YEAR	Rump Width
141	-0.876498	46	INTERACTION FARM/KIDDING YEAR	Rump Width
142	0.493834	47	INTERACTION FARM/KIDDING YEAR	Rump Width
143	-0.84642	48	INTERACTION FARM/KIDDING YEAR	Rump Width
144	-1.42794	49	INTERACTION FARM/KIDDING YEAR	Rump Width
145	-0.476589	50	INTERACTION FARM/KIDDING YEAR	Rump Width
146	-0.185078	51	INTERACTION FARM/KIDDING YEAR	Rump Width
147	-0.231375	52	INTERACTION FARM/KIDDING YEAR	Rump Width
148	0	53	INTERACTION FARM/KIDDING YEAR	Rump Width
149	-0.170264	54	INTERACTION FARM/KIDDING YEAR	Rump Width
150	0.0435104	55	INTERACTION FARM/KIDDING YEAR	Rump Width
151	-0.238003	56	INTERACTION FARM/KIDDING YEAR	Rump Width
152	-0.271498	57	INTERACTION FARM/KIDDING YEAR	Rump Width
153	-0.442791	58	INTERACTION FARM/KIDDING YEAR	Rump Width
154	-0.925911	59	INTERACTION FARM/KIDDING YEAR	Rump Width
155	-0.18684	60	INTERACTION FARM/KIDDING YEAR	Rump Width
156	-0.562502	61	INTERACTION FARM/KIDDING YEAR	Rump Width
157	-0.91912	62	INTERACTION FARM/KIDDING YEAR	Rump Width
158	-0.247351	63	INTERACTION FARM/KIDDING YEAR	Rump Width
159	-0.734438	64	INTERACTION FARM/KIDDING YEAR	Rump Width
160	-0.204898	65	INTERACTION FARM/KIDDING YEAR	Rump Width
161	-0.516209	66	INTERACTION FARM/KIDDING YEAR	Rump Width
162	-0.367014	67	INTERACTION FARM/KIDDING YEAR	Rump Width
163	-0.221573	68	INTERACTION FARM/KIDDING YEAR	Rump Width
164	0.0651837	69	INTERACTION FARM/KIDDING YEAR	Rump Width
165	-0.564457	70	INTERACTION FARM/KIDDING YEAR	Rump Width
166	0	71	INTERACTION FARM/KIDDING YEAR	Rump Width
167	-0.339134	72	INTERACTION FARM/KIDDING YEAR	Rump Width
168	-0.791324	73	INTERACTION FARM/KIDDING YEAR	Rump Width
169	0.0292891	74	INTERACTION FARM/KIDDING YEAR	Rump Width
170	0	75	INTERACTION FARM/KIDDING YEAR	Rump Width
171	-1.19157	76	INTERACTION FARM/KIDDING YEAR	Rump Width
172	0	77	INTERACTION FARM/KIDDING YEAR	Rump Width
173	-0.653454	78	INTERACTION FARM/KIDDING YEAR	Rump Width
174	0.213007	79	INTERACTION FARM/KIDDING YEAR	Rump Width
175	0	80	INTERACTION FARM/KIDDING YEAR	Rump Width
176	0.160587	81	INTERACTION FARM/KIDDING YEAR	Rump Width
177	-0.602587	82	INTERACTION FARM/KIDDING YEAR	Rump Width
178	-2.5398	83	INTERACTION FARM/KIDDING YEAR	Rump Width
179	-0.365246	84	INTERACTION FARM/KIDDING YEAR	Rump Width
180	0	85	INTERACTION FARM/KIDDING YEAR	Rump Width
181	-0.0996077	86	INTERACTION FARM/KIDDING YEAR	Rump Width
182	0.146236	87	INTERACTION FARM/KIDDING YEAR	Rump Width
183	0.303917	88	INTERACTION FARM/KIDDING YEAR	Rump Width
184	0	89	INTERACTION FARM/KIDDING YEAR	Rump Width
185	0.108246	90	INTERACTION FARM/KIDDING YEAR	Rump Width
186	0	91	INTERACTION FARM/KIDDING YEAR	Rump Width
187	-0.73313	92	INTERACTION FARM/KIDDING YEAR	Rump Width
188	-0.625872	93	INTERACTION FARM/KIDDING YEAR	Rump Width
189	-2.68243	94	INTERACTION FARM/KIDDING YEAR	Rump Width
190	-1.62869	95	INTERACTION FARM/KIDDING YEAR	Rump Width
191	-0.48701	97	INTERACTION FARM/KIDDING YEAR	Rump Width
192	-0.249637	98	INTERACTION FARM/KIDDING YEAR	Rump Width
193	0.500876	99	INTERACTION FARM/KIDDING YEAR	Rump Width
194	0.516125	100	INTERACTION FARM/KIDDING YEAR	Rump Width
195	0.634075	101	INTERACTION FARM/KIDDING YEAR	Rump Width
196	-0.0518538	102	INTERACTION FARM/KIDDING YEAR	Rump Width
197	-0.222267	103	INTERACTION FARM/KIDDING YEAR	Rump Width
198	-0.455872	104	INTERACTION FARM/KIDDING YEAR	Rump Width
199	-0.630572	105	INTERACTION FARM/KIDDING YEAR	Rump Width
200	-0.366197	106	INTERACTION FARM/KIDDING YEAR	Rump Width
201	-2.37237	107	INTERACTION FARM/KIDDING YEAR	Rump Width
202	-0.760247	108	INTERACTION FARM/KIDDING YEAR	Rump Width
203	-0.479705	109	INTERACTION FARM/KIDDING YEAR	Rump Width
204	0	110	INTERACTION FARM/KIDDING YEAR	Rump Width
205	-1.34008	111	INTERACTION FARM/KIDDING YEAR	Rump Width
206	-0.269482	112	INTERACTION FARM/KIDDING YEAR	Rump Width
207	0.152323	113	INTERACTION FARM/KIDDING YEAR	Rump Width
208	-0.157181	114	INTERACTION FARM/KIDDING YEAR	Rump Width
209	-0.434778	115	INTERACTION FARM/KIDDING YEAR	Rump Width
210	0	116	INTERACTION FARM/KIDDING YEAR	Rump Width
211	-0.835517	117	INTERACTION FARM/KIDDING YEAR	Rump Width
212	0.111628	118	INTERACTION FARM/KIDDING YEAR	Rump Width
213	-0.345992	119	INTERACTION FARM/KIDDING YEAR	Rump Width
214	0.425794	120	INTERACTION FARM/KIDDING YEAR	Rump Width
215	-2.15946	121	INTERACTION FARM/KIDDING YEAR	Rump Width
216	0.497649	122	INTERACTION FARM/KIDDING YEAR	Rump Width
217	-0.488889	123	INTERACTION FARM/KIDDING YEAR	Rump Width
218	-1.55426	124	INTERACTION FARM/KIDDING YEAR	Rump Width
219	-2.23227	125	INTERACTION FARM/KIDDING YEAR	Rump Width
220	-0.83601	126	INTERACTION FARM/KIDDING YEAR	Rump Width
221	0.263822	127	INTERACTION FARM/KIDDING YEAR	Rump Width
222	0.220033	128	INTERACTION FARM/KIDDING YEAR	Rump Width
223	-0.252498	129	INTERACTION FARM/KIDDING YEAR	Rump Width
224	-0.762795	130	INTERACTION FARM/KIDDING YEAR	Rump Width
225	-0.210046	131	INTERACTION FARM/KIDDING YEAR	Rump Width
226	-0.0814899	132	INTERACTION FARM/KIDDING YEAR	Rump Width
227	-0.0629626	133	INTERACTION FARM/KIDDING YEAR	Rump Width
228	-0.260835	134	INTERACTION FARM/KIDDING YEAR	Rump Width
229	-0.512262	135	INTERACTION FARM/KIDDING YEAR	Rump Width
230	0.145315	136	INTERACTION FARM/KIDDING YEAR	Rump Width
231	0	137	INTERACTION FARM/KIDDING YEAR	Rump Width
232	0.516104	138	INTERACTION FARM/KIDDING YEAR	Rump Width
233	-0.387229	139	INTERACTION FARM/KIDDING YEAR	Rump Width
234	-0.0893839	140	INTERACTION FARM/KIDDING YEAR	Rump Width
235	0	141	INTERACTION FARM/KIDDING YEAR	Rump Width
236	-0.254921	142	INTERACTION FARM/KIDDING YEAR	Rump Width
237	0.498991	143	INTERACTION FARM/KIDDING YEAR	Rump Width
238	0.667607	144	INTERACTION FARM/KIDDING YEAR	Rump Width
239	0.695641	145	INTERACTION FARM/KIDDING YEAR	Rump Width
240	1.02827	146	INTERACTION FARM/KIDDING YEAR	Rump Width
241	0.399893	147	INTERACTION FARM/KIDDING YEAR	Rump Width
242	-0.0405347	148	INTERACTION FARM/KIDDING YEAR	Rump Width
243	0.805085	149	INTERACTION FARM/KIDDING YEAR	Rump Width
244	0.795273	150	INTERACTION FARM/KIDDING YEAR	Rump Width
245	-0.00717307	151	INTERACTION FARM/KIDDING YEAR	Rump Width
246	-0.173326	152	INTERACTION FARM/KIDDING YEAR	Rump Width
247	0.0509089	153	INTERACTION FARM/KIDDING YEAR	Rump Width
248	-0.183591	154	INTERACTION FARM/KIDDING YEAR	Rump Width
249	0.181523	155	INTERACTION FARM/KIDDING YEAR	Rump Width
250	-0.266206	156	INTERACTION FARM/KIDDING YEAR	Rump Width
251	1.09629	157	INTERACTION FARM/KIDDING YEAR	Rump Width
252	-1.05429	158	INTERACTION FARM/KIDDING YEAR	Rump Width
253	-0.438861	160	INTERACTION FARM/KIDDING YEAR	Rump Width
254	-0.428627	161	INTERACTION FARM/KIDDING YEAR	Rump Width
255	-0.379205	162	INTERACTION FARM/KIDDING YEAR	Rump Width
256	-0.830994	163	INTERACTION FARM/KIDDING YEAR	Rump Width
257	-1.75212	164	INTERACTION FARM/KIDDING YEAR	Rump Width
258	-0.353593	165	INTERACTION FARM/KIDDING YEAR	Rump Width
259	-0.0583503	166	INTERACTION FARM/KIDDING YEAR	Rump Width
260	-0.159069	167	INTERACTION FARM/KIDDING YEAR	Rump Width
261	0.0898475	168	INTERACTION FARM/KIDDING YEAR	Rump Width
262	0	169	INTERACTION FARM/KIDDING YEAR	Rump Width
263	0.540207	170	INTERACTION FARM/KIDDING YEAR	Rump Width
264	0.718439	171	INTERACTION FARM/KIDDING YEAR	Rump Width
265	-0.0650909	172	INTERACTION FARM/KIDDING YEAR	Rump Width
266	0.584024	173	INTERACTION FARM/KIDDING YEAR	Rump Width
267	0.46362	174	INTERACTION FARM/KIDDING YEAR	Rump Width
268	0	175	INTERACTION FARM/KIDDING YEAR	Rump Width
269	0.396585	176	INTERACTION FARM/KIDDING YEAR	Rump Width
270	0.0816606	177	INTERACTION FARM/KIDDING YEAR	Rump Width
271	0.142075	178	INTERACTION FARM/KIDDING YEAR	Rump Width
272	0.126577	179	INTERACTION FARM/KIDDING YEAR	Rump Width
273	0.0761272	180	INTERACTION FARM/KIDDING YEAR	Rump Width
274	0.391691	181	INTERACTION FARM/KIDDING YEAR	Rump Width
275	-0.0440963	183	INTERACTION FARM/KIDDING YEAR	Rump Width
276	-0.457188	184	INTERACTION FARM/KIDDING YEAR	Rump Width
277	-0.163204	185	INTERACTION FARM/KIDDING YEAR	Rump Width
278	-0.123816	186	INTERACTION FARM/KIDDING YEAR	Rump Width
279	-0.0268714	187	INTERACTION FARM/KIDDING YEAR	Rump Width
280	0	188	INTERACTION FARM/KIDDING YEAR	Rump Width
281	0	189	INTERACTION FARM/KIDDING YEAR	Rump Width
282	0.541201	190	INTERACTION FARM/KIDDING YEAR	Rump Width
283	1.41757	191	INTERACTION FARM/KIDDING YEAR	Rump Width
284	-1.1312	192	INTERACTION FARM/KIDDING YEAR	Rump Width
285	-0.634985	193	INTERACTION FARM/KIDDING YEAR	Rump Width
286	-1.92601	194	INTERACTION FARM/KIDDING YEAR	Rump Width
287	0.069606	195	INTERACTION FARM/KIDDING YEAR	Rump Width
288	-0.264128	196	INTERACTION FARM/KIDDING YEAR	Rump Width
289	-0.124607	197	INTERACTION FARM/KIDDING YEAR	Rump Width
290	-0.0457886	198	INTERACTION FARM/KIDDING YEAR	Rump Width
291	-0.934369	199	INTERACTION FARM/KIDDING YEAR	Rump Width
292	-0.456011	200	INTERACTION FARM/KIDDING YEAR	Rump Width
293	-0.473953	201	INTERACTION FARM/KIDDING YEAR	Rump Width
294	1.00599	202	INTERACTION FARM/KIDDING YEAR	Rump Width
295	0.540849	203	INTERACTION FARM/KIDDING YEAR	Rump Width
296	0.646888	204	INTERACTION FARM/KIDDING YEAR	Rump Width
297	1.0383	205	INTERACTION FARM/KIDDING YEAR	Rump Width
298	0.0598907	206	INTERACTION FARM/KIDDING YEAR	Rump Width
299	0.390157	207	INTERACTION FARM/KIDDING YEAR	Rump Width
300	0	208	INTERACTION FARM/KIDDING YEAR	Rump Width
301	0.376828	209	INTERACTION FARM/KIDDING YEAR	Rump Width
302	1.31936	210	INTERACTION FARM/KIDDING YEAR	Rump Width
303	0.898007	211	INTERACTION FARM/KIDDING YEAR	Rump Width
304	0.144656	212	INTERACTION FARM/KIDDING YEAR	Rump Width
305	-0.230682	213	INTERACTION FARM/KIDDING YEAR	Rump Width
306	-0.127713	214	INTERACTION FARM/KIDDING YEAR	Rump Width
307	0.303109	215	INTERACTION FARM/KIDDING YEAR	Rump Width
308	-1.4811	216	INTERACTION FARM/KIDDING YEAR	Rump Width
309	-0.120163	217	INTERACTION FARM/KIDDING YEAR	Rump Width
310	-2.59488	218	INTERACTION FARM/KIDDING YEAR	Rump Width
311	-0.368125	219	INTERACTION FARM/KIDDING YEAR	Rump Width
312	-1.11357	220	INTERACTION FARM/KIDDING YEAR	Rump Width
313	-0.0910495	221	INTERACTION FARM/KIDDING YEAR	Rump Width
314	4.133e-05	222	INTERACTION FARM/KIDDING YEAR	Rump Width
315	0.147606	223	INTERACTION FARM/KIDDING YEAR	Rump Width
316	-0.197247	224	INTERACTION FARM/KIDDING YEAR	Rump Width
317	-0.0306513	225	INTERACTION FARM/KIDDING YEAR	Rump Width
318	0.0113996	226	INTERACTION FARM/KIDDING YEAR	Rump Width
319	-0.119151	227	INTERACTION FARM/KIDDING YEAR	Rump Width
320	0.461168	228	INTERACTION FARM/KIDDING YEAR	Rump Width
321	0.00851169	229	INTERACTION FARM/KIDDING YEAR	Rump Width
322	0	230	INTERACTION FARM/KIDDING YEAR	Rump Width
323	-0.544619	231	INTERACTION FARM/KIDDING YEAR	Rump Width
324	-0.0161068	232	INTERACTION FARM/KIDDING YEAR	Rump Width
325	-0.167022	233	INTERACTION FARM/KIDDING YEAR	Rump Width
326	0.502319	234	INTERACTION FARM/KIDDING YEAR	Rump Width
327	0.0272993	235	INTERACTION FARM/KIDDING YEAR	Rump Width
328	0.266365	236	INTERACTION FARM/KIDDING YEAR	Rump Width
329	-0.00224268	237	INTERACTION FARM/KIDDING YEAR	Rump Width
330	0.628208	238	INTERACTION FARM/KIDDING YEAR	Rump Width
331	-0.432251	239	INTERACTION FARM/KIDDING YEAR	Rump Width
332	0.0626164	240	INTERACTION FARM/KIDDING YEAR	Rump Width
333	0	241	INTERACTION FARM/KIDDING YEAR	Rump Width
334	-0.511255	242	INTERACTION FARM/KIDDING YEAR	Rump Width
335	-0.463355	243	INTERACTION FARM/KIDDING YEAR	Rump Width
336	0.204323	244	INTERACTION FARM/KIDDING YEAR	Rump Width
337	0.493873	245	INTERACTION FARM/KIDDING YEAR	Rump Width
338	-0.0261819	246	INTERACTION FARM/KIDDING YEAR	Rump Width
339	0.492136	247	INTERACTION FARM/KIDDING YEAR	Rump Width
340	-0.00065636	248	INTERACTION FARM/KIDDING YEAR	Rump Width
341	-0.418452	249	INTERACTION FARM/KIDDING YEAR	Rump Width
342	0.978343	250	INTERACTION FARM/KIDDING YEAR	Rump Width
343	0	251	INTERACTION FARM/KIDDING YEAR	Rump Width
344	0.0634978	252	INTERACTION FARM/KIDDING YEAR	Rump Width
345	0.106505	253	INTERACTION FARM/KIDDING YEAR	Rump Width
346	0	254	INTERACTION FARM/KIDDING YEAR	Rump Width
347	0.957287	255	INTERACTION FARM/KIDDING YEAR	Rump Width
348	0.470256	256	INTERACTION FARM/KIDDING YEAR	Rump Width
349	0.419877	257	INTERACTION FARM/KIDDING YEAR	Rump Width
350	-0.00051466	258	INTERACTION FARM/KIDDING YEAR	Rump Width
351	-1.12274	259	INTERACTION FARM/KIDDING YEAR	Rump Width
352	-1.81297	260	INTERACTION FARM/KIDDING YEAR	Rump Width
353	-0.211591	261	INTERACTION FARM/KIDDING YEAR	Rump Width
354	-0.411498	262	INTERACTION FARM/KIDDING YEAR	Rump Width
355	-1.14727	263	INTERACTION FARM/KIDDING YEAR	Rump Width
356	0.236646	264	INTERACTION FARM/KIDDING YEAR	Rump Width
357	-0.312123	265	INTERACTION FARM/KIDDING YEAR	Rump Width
358	0.00098209	266	INTERACTION FARM/KIDDING YEAR	Rump Width
359	0.138252	267	INTERACTION FARM/KIDDING YEAR	Rump Width
360	-0.208299	268	INTERACTION FARM/KIDDING YEAR	Rump Width
361	-0.0240693	269	INTERACTION FARM/KIDDING YEAR	Rump Width
362	0.0579234	270	INTERACTION FARM/KIDDING YEAR	Rump Width
363	0.514133	271	INTERACTION FARM/KIDDING YEAR	Rump Width
364	-0.351157	272	INTERACTION FARM/KIDDING YEAR	Rump Width
365	-0.358451	273	INTERACTION FARM/KIDDING YEAR	Rump Width
366	-0.133036	274	INTERACTION FARM/KIDDING YEAR	Rump Width
367	-0.458802	275	INTERACTION FARM/KIDDING YEAR	Rump Width
368	0.00827884	276	INTERACTION FARM/KIDDING YEAR	Rump Width
369	0.0248894	277	INTERACTION FARM/KIDDING YEAR	Rump Width
370	-0.0794211	278	INTERACTION FARM/KIDDING YEAR	Rump Width
371	-0.156034	279	INTERACTION FARM/KIDDING YEAR	Rump Width
372	-0.98168	280	INTERACTION FARM/KIDDING YEAR	Rump Width
373	-1.57309	281	INTERACTION FARM/KIDDING YEAR	Rump Width
374	0	282	INTERACTION FARM/KIDDING YEAR	Rump Width
375	1.46623	283	INTERACTION FARM/KIDDING YEAR	Rump Width
376	1.02149	284	INTERACTION FARM/KIDDING YEAR	Rump Width
377	0.0197932	285	INTERACTION FARM/KIDDING YEAR	Rump Width
378	0.357891	286	INTERACTION FARM/KIDDING YEAR	Rump Width
379	0.565548	287	INTERACTION FARM/KIDDING YEAR	Rump Width
380	0	288	INTERACTION FARM/KIDDING YEAR	Rump Width
381	0.298688	289	INTERACTION FARM/KIDDING YEAR	Rump Width
382	0.111165	290	INTERACTION FARM/KIDDING YEAR	Rump Width
383	0	291	INTERACTION FARM/KIDDING YEAR	Rump Width
384	-0.0870603	292	INTERACTION FARM/KIDDING YEAR	Rump Width
385	-0.454598	293	INTERACTION FARM/KIDDING YEAR	Rump Width
386	0	294	INTERACTION FARM/KIDDING YEAR	Rump Width
387	-0.253451	295	INTERACTION FARM/KIDDING YEAR	Rump Width
388	-0.346664	296	INTERACTION FARM/KIDDING YEAR	Rump Width
389	0.672287	297	INTERACTION FARM/KIDDING YEAR	Rump Width
390	0	298	INTERACTION FARM/KIDDING YEAR	Rump Width
391	-0.151763	299	INTERACTION FARM/KIDDING YEAR	Rump Width
392	0.36313	300	INTERACTION FARM/KIDDING YEAR	Rump Width
393	-0.359624	301	INTERACTION FARM/KIDDING YEAR	Rump Width
394	0.644868	302	INTERACTION FARM/KIDDING YEAR	Rump Width
395	-0.178536	303	INTERACTION FARM/KIDDING YEAR	Rump Width
396	0.614225	304	INTERACTION FARM/KIDDING YEAR	Rump Width
397	0.196732	305	INTERACTION FARM/KIDDING YEAR	Rump Width
398	-0.31505	306	INTERACTION FARM/KIDDING YEAR	Rump Width
399	-0.196839	307	INTERACTION FARM/KIDDING YEAR	Rump Width
400	1.36028	308	INTERACTION FARM/KIDDING YEAR	Rump Width
401	0	309	INTERACTION FARM/KIDDING YEAR	Rump Width
402	0	310	INTERACTION FARM/KIDDING YEAR	Rump Width
403	0.450825	311	INTERACTION FARM/KIDDING YEAR	Rump Width
404	0.246181	312	INTERACTION FARM/KIDDING YEAR	Rump Width
405	-0.0746344	313	INTERACTION FARM/KIDDING YEAR	Rump Width
406	-0.526822	314	INTERACTION FARM/KIDDING YEAR	Rump Width
407	-0.281157	315	INTERACTION FARM/KIDDING YEAR	Rump Width
408	-0.25961	316	INTERACTION FARM/KIDDING YEAR	Rump Width
409	0	317	INTERACTION FARM/KIDDING YEAR	Rump Width
410	0.0858002	318	INTERACTION FARM/KIDDING YEAR	Rump Width
411	0.487301	319	INTERACTION FARM/KIDDING YEAR	Rump Width
412	0.371238	320	INTERACTION FARM/KIDDING YEAR	Rump Width
413	-0.202374	321	INTERACTION FARM/KIDDING YEAR	Rump Width
414	0.198999	322	INTERACTION FARM/KIDDING YEAR	Rump Width
415	0.542432	323	INTERACTION FARM/KIDDING YEAR	Rump Width
416	0.45328	324	INTERACTION FARM/KIDDING YEAR	Rump Width
417	0	325	INTERACTION FARM/KIDDING YEAR	Rump Width
418	0.38894	326	INTERACTION FARM/KIDDING YEAR	Rump Width
419	-0.158192	327	INTERACTION FARM/KIDDING YEAR	Rump Width
420	-0.469282	328	INTERACTION FARM/KIDDING YEAR	Rump Width
421	-0.0379885	329	INTERACTION FARM/KIDDING YEAR	Rump Width
422	0.365675	330	INTERACTION FARM/KIDDING YEAR	Rump Width
423	0	331	INTERACTION FARM/KIDDING YEAR	Rump Width
424	-0.379617	332	INTERACTION FARM/KIDDING YEAR	Rump Width
425	-0.439506	333	INTERACTION FARM/KIDDING YEAR	Rump Width
426	0.572655	334	INTERACTION FARM/KIDDING YEAR	Rump Width
427	0.367043	335	INTERACTION FARM/KIDDING YEAR	Rump Width
428	-0.163454	336	INTERACTION FARM/KIDDING YEAR	Rump Width
429	-0.214911	337	INTERACTION FARM/KIDDING YEAR	Rump Width
430	1.15062	338	INTERACTION FARM/KIDDING YEAR	Rump Width
431	-0.452259	339	INTERACTION FARM/KIDDING YEAR	Rump Width
432	-0.330664	340	INTERACTION FARM/KIDDING YEAR	Rump Width
433	0	341	INTERACTION FARM/KIDDING YEAR	Rump Width
434	-0.0837422	342	INTERACTION FARM/KIDDING YEAR	Rump Width
435	-0.0964301	343	INTERACTION FARM/KIDDING YEAR	Rump Width
436	-0.427934	344	INTERACTION FARM/KIDDING YEAR	Rump Width
437	-0.714098	345	INTERACTION FARM/KIDDING YEAR	Rump Width
438	-0.549095	346	INTERACTION FARM/KIDDING YEAR	Rump Width
439	0.655095	347	INTERACTION FARM/KIDDING YEAR	Rump Width
440	-0.18712	348	INTERACTION FARM/KIDDING YEAR	Rump Width
441	0	349	INTERACTION FARM/KIDDING YEAR	Rump Width
442	-0.132487	350	INTERACTION FARM/KIDDING YEAR	Rump Width
443	1.21409	351	INTERACTION FARM/KIDDING YEAR	Rump Width
444	-0.0595631	352	INTERACTION FARM/KIDDING YEAR	Rump Width
445	0.121059	353	INTERACTION FARM/KIDDING YEAR	Rump Width
446	-0.105859	354	INTERACTION FARM/KIDDING YEAR	Rump Width
447	0.281123	355	INTERACTION FARM/KIDDING YEAR	Rump Width
448	-0.0917648	356	INTERACTION FARM/KIDDING YEAR	Rump Width
449	0.627512	357	INTERACTION FARM/KIDDING YEAR	Rump Width
450	0.324758	358	INTERACTION FARM/KIDDING YEAR	Rump Width
451	0	359	INTERACTION FARM/KIDDING YEAR	Rump Width
452	-1.09526	360	INTERACTION FARM/KIDDING YEAR	Rump Width
453	0	361	INTERACTION FARM/KIDDING YEAR	Rump Width
454	0	362	INTERACTION FARM/KIDDING YEAR	Rump Width
455	-0.295379	363	INTERACTION FARM/KIDDING YEAR	Rump Width
456	0	364	INTERACTION FARM/KIDDING YEAR	Rump Width
457	0.219151	365	INTERACTION FARM/KIDDING YEAR	Rump Width
458	0	366	INTERACTION FARM/KIDDING YEAR	Rump Width
459	0	367	INTERACTION FARM/KIDDING YEAR	Rump Width
460	0	368	INTERACTION FARM/KIDDING YEAR	Rump Width
461	0.79518	369	INTERACTION FARM/KIDDING YEAR	Rump Width
462	-0.657774	370	INTERACTION FARM/KIDDING YEAR	Rump Width
463	0.463972	371	INTERACTION FARM/KIDDING YEAR	Rump Width
464	-0.0444568	372	INTERACTION FARM/KIDDING YEAR	Rump Width
465	0	373	INTERACTION FARM/KIDDING YEAR	Rump Width
466	0	374	INTERACTION FARM/KIDDING YEAR	Rump Width
467	0.248148	375	INTERACTION FARM/KIDDING YEAR	Rump Width
468	0.487504	376	INTERACTION FARM/KIDDING YEAR	Rump Width
469	0	377	INTERACTION FARM/KIDDING YEAR	Rump Width
470	0.310049	378	INTERACTION FARM/KIDDING YEAR	Rump Width
471	0	379	INTERACTION FARM/KIDDING YEAR	Rump Width
472	0	380	INTERACTION FARM/KIDDING YEAR	Rump Width
473	0.382608	381	INTERACTION FARM/KIDDING YEAR	Rump Width
474	-0.598581	382	INTERACTION FARM/KIDDING YEAR	Rump Width
475	0.932586	383	INTERACTION FARM/KIDDING YEAR	Rump Width
476	0.823803	384	INTERACTION FARM/KIDDING YEAR	Rump Width
477	0.338321	385	INTERACTION FARM/KIDDING YEAR	Rump Width
478	0.0745769	386	INTERACTION FARM/KIDDING YEAR	Rump Width
479	0	387	INTERACTION FARM/KIDDING YEAR	Rump Width
480	-0.0235657	388	INTERACTION FARM/KIDDING YEAR	Rump Width
481	0.226206	389	INTERACTION FARM/KIDDING YEAR	Rump Width
482	0.0213364	390	INTERACTION FARM/KIDDING YEAR	Rump Width
483	0	391	INTERACTION FARM/KIDDING YEAR	Rump Width
484	0.0754442	393	INTERACTION FARM/KIDDING YEAR	Rump Width
485	0	394	INTERACTION FARM/KIDDING YEAR	Rump Width
486	0	395	INTERACTION FARM/KIDDING YEAR	Rump Width
487	0	396	INTERACTION FARM/KIDDING YEAR	Rump Width
488	0.890699	397	INTERACTION FARM/KIDDING YEAR	Rump Width
489	0	398	INTERACTION FARM/KIDDING YEAR	Rump Width
490	0.0963145	399	INTERACTION FARM/KIDDING YEAR	Rump Width
491	0.828102	400	INTERACTION FARM/KIDDING YEAR	Rump Width
492	0.711396	401	INTERACTION FARM/KIDDING YEAR	Rump Width
493	0.279106	402	INTERACTION FARM/KIDDING YEAR	Rump Width
494	0	403	INTERACTION FARM/KIDDING YEAR	Rump Width
495	1.09432	404	INTERACTION FARM/KIDDING YEAR	Rump Width
496	0	405	INTERACTION FARM/KIDDING YEAR	Rump Width
497	0.0582371	1	FARM	Rear Insertion Height
498	0.0885627	2	FARM	Rear Insertion Height
499	0.0051655	3	FARM	Rear Insertion Height
500	0.0592874	4	FARM	Rear Insertion Height
501	0.53212	5	FARM	Rear Insertion Height
502	0	6	FARM	Rear Insertion Height
503	0	7	FARM	Rear Insertion Height
504	0.487622	8	FARM	Rear Insertion Height
505	-0.0620925	9	FARM	Rear Insertion Height
506	0.492436	10	FARM	Rear Insertion Height
507	-0.819235	13	FARM	Rear Insertion Height
508	0	14	FARM	Rear Insertion Height
509	-0.395229	15	FARM	Rear Insertion Height
510	0	16	FARM	Rear Insertion Height
511	0.210808	17	FARM	Rear Insertion Height
512	0.224417	18	FARM	Rear Insertion Height
513	-0.204437	19	FARM	Rear Insertion Height
514	-0.0356147	20	FARM	Rear Insertion Height
515	0.166384	21	FARM	Rear Insertion Height
516	0.318275	23	FARM	Rear Insertion Height
517	0.121842	24	FARM	Rear Insertion Height
518	0.471336	25	FARM	Rear Insertion Height
519	0	26	FARM	Rear Insertion Height
520	-0.483967	27	FARM	Rear Insertion Height
521	-0.339788	28	FARM	Rear Insertion Height
522	-0.0622613	29	FARM	Rear Insertion Height
523	-0.572271	30	FARM	Rear Insertion Height
524	0.010203	31	FARM	Rear Insertion Height
525	-0.202359	32	FARM	Rear Insertion Height
526	-0.175152	33	FARM	Rear Insertion Height
527	-0.405065	34	FARM	Rear Insertion Height
528	-0.259821	35	FARM	Rear Insertion Height
529	-0.115366	36	FARM	Rear Insertion Height
530	0	38	FARM	Rear Insertion Height
531	-0.0330166	39	FARM	Rear Insertion Height
532	-1.49099	40	FARM	Rear Insertion Height
533	0.0761581	41	FARM	Rear Insertion Height
534	-0.564869	42	FARM	Rear Insertion Height
535	-0.264734	43	FARM	Rear Insertion Height
536	-0.322546	44	FARM	Rear Insertion Height
537	0.194474	45	FARM	Rear Insertion Height
538	-0.228613	48	FARM	Rear Insertion Height
539	0	49	FARM	Rear Insertion Height
540	0	50	FARM	Rear Insertion Height
541	0.170656	51	FARM	Rear Insertion Height
542	-0.16877	52	FARM	Rear Insertion Height
543	0.17034	53	FARM	Rear Insertion Height
544	-0.213302	54	FARM	Rear Insertion Height
545	-0.511343	55	FARM	Rear Insertion Height
546	0.045973	56	FARM	Rear Insertion Height
547	-0.0844755	57	FARM	Rear Insertion Height
548	0.198723	58	FARM	Rear Insertion Height
549	0.121842	59	FARM	Rear Insertion Height
550	0.584986	60	FARM	Rear Insertion Height
551	-0.710774	61	FARM	Rear Insertion Height
552	-0.501998	62	FARM	Rear Insertion Height
553	0.430628	63	FARM	Rear Insertion Height
554	0.491047	64	FARM	Rear Insertion Height
555	-0.225067	65	FARM	Rear Insertion Height
556	0.0516677	66	FARM	Rear Insertion Height
557	0.0336939	68	FARM	Rear Insertion Height
558	-1.03696	69	FARM	Rear Insertion Height
559	0	70	FARM	Rear Insertion Height
560	-0.507957	71	FARM	Rear Insertion Height
561	-0.701781	73	FARM	Rear Insertion Height
562	0	74	FARM	Rear Insertion Height
563	-1.20305	75	FARM	Rear Insertion Height
564	0.465024	76	FARM	Rear Insertion Height
565	-0.474265	78	FARM	Rear Insertion Height
566	-0.264173	79	FARM	Rear Insertion Height
567	-0.432693	80	FARM	Rear Insertion Height
568	0.190085	81	FARM	Rear Insertion Height
569	0	82	FARM	Rear Insertion Height
570	-1.33264	83	FARM	Rear Insertion Height
571	-0.610322	84	FARM	Rear Insertion Height
572	0.559966	85	FARM	Rear Insertion Height
573	0.137236	1	LACTATION STAGE	Rear Insertion Height
574	0	2	LACTATION STAGE	Rear Insertion Height
575	-0.0333107	1	KIDDING MONTH	Rear Insertion Height
576	0.00587604	2	KIDDING MONTH	Rear Insertion Height
577	-0.0175311	3	KIDDING MONTH	Rear Insertion Height
578	-0.0587509	4	KIDDING MONTH	Rear Insertion Height
579	-0.0641763	5	KIDDING MONTH	Rear Insertion Height
580	-0.15486	6	KIDDING MONTH	Rear Insertion Height
581	-0.121957	7	KIDDING MONTH	Rear Insertion Height
582	-0.11568	8	KIDDING MONTH	Rear Insertion Height
583	-0.069885	9	KIDDING MONTH	Rear Insertion Height
584	-0.018468	10	KIDDING MONTH	Rear Insertion Height
585	-0.0131589	11	KIDDING MONTH	Rear Insertion Height
586	0	12	KIDDING MONTH	Rear Insertion Height
587	0	1	INTERACTION FARM/KIDDING YEAR	Rear Insertion Height
588	0	2	INTERACTION FARM/KIDDING YEAR	Rear Insertion Height
589	-0.323475	3	INTERACTION FARM/KIDDING YEAR	Rear Insertion Height
590	-0.948296	4	INTERACTION FARM/KIDDING YEAR	Rear Insertion Height
591	-0.550735	5	INTERACTION FARM/KIDDING YEAR	Rear Insertion Height
592	-1.89172	7	INTERACTION FARM/KIDDING YEAR	Rear Insertion Height
593	0.0416471	8	INTERACTION FARM/KIDDING YEAR	Rear Insertion Height
594	1.28567	9	INTERACTION FARM/KIDDING YEAR	Rear Insertion Height
595	-0.667979	10	INTERACTION FARM/KIDDING YEAR	Rear Insertion Height
596	0	11	INTERACTION FARM/KIDDING YEAR	Rear Insertion Height
597	-0.212035	12	INTERACTION FARM/KIDDING YEAR	Rear Insertion Height
598	0.724138	13	INTERACTION FARM/KIDDING YEAR	Rear Insertion Height
599	-1.46441	14	INTERACTION FARM/KIDDING YEAR	Rear Insertion Height
600	0.119875	15	INTERACTION FARM/KIDDING YEAR	Rear Insertion Height
601	0	16	INTERACTION FARM/KIDDING YEAR	Rear Insertion Height
602	-0.460355	17	INTERACTION FARM/KIDDING YEAR	Rear Insertion Height
603	0	18	INTERACTION FARM/KIDDING YEAR	Rear Insertion Height
604	0.89361	19	INTERACTION FARM/KIDDING YEAR	Rear Insertion Height
605	0	20	INTERACTION FARM/KIDDING YEAR	Rear Insertion Height
606	0.265737	21	INTERACTION FARM/KIDDING YEAR	Rear Insertion Height
607	-0.84999	22	INTERACTION FARM/KIDDING YEAR	Rear Insertion Height
608	0	23	INTERACTION FARM/KIDDING YEAR	Rear Insertion Height
609	-0.474113	24	INTERACTION FARM/KIDDING YEAR	Rear Insertion Height
610	0.176064	25	INTERACTION FARM/KIDDING YEAR	Rear Insertion Height
611	0.047003	26	INTERACTION FARM/KIDDING YEAR	Rear Insertion Height
612	0.00697999	27	INTERACTION FARM/KIDDING YEAR	Rear Insertion Height
613	0.121123	28	INTERACTION FARM/KIDDING YEAR	Rear Insertion Height
614	-0.371749	29	INTERACTION FARM/KIDDING YEAR	Rear Insertion Height
615	-0.797458	30	INTERACTION FARM/KIDDING YEAR	Rear Insertion Height
616	-0.747914	31	INTERACTION FARM/KIDDING YEAR	Rear Insertion Height
617	-1.92822	32	INTERACTION FARM/KIDDING YEAR	Rear Insertion Height
618	-0.687959	33	INTERACTION FARM/KIDDING YEAR	Rear Insertion Height
619	0.0910498	34	INTERACTION FARM/KIDDING YEAR	Rear Insertion Height
620	0	35	INTERACTION FARM/KIDDING YEAR	Rear Insertion Height
621	-0.221941	36	INTERACTION FARM/KIDDING YEAR	Rear Insertion Height
622	2.83587	37	INTERACTION FARM/KIDDING YEAR	Rear Insertion Height
623	-0.957423	38	INTERACTION FARM/KIDDING YEAR	Rear Insertion Height
624	-0.703608	39	INTERACTION FARM/KIDDING YEAR	Rear Insertion Height
625	-0.366896	40	INTERACTION FARM/KIDDING YEAR	Rear Insertion Height
626	-0.236371	41	INTERACTION FARM/KIDDING YEAR	Rear Insertion Height
627	-0.215894	42	INTERACTION FARM/KIDDING YEAR	Rear Insertion Height
628	0.515713	43	INTERACTION FARM/KIDDING YEAR	Rear Insertion Height
629	1.63797	44	INTERACTION FARM/KIDDING YEAR	Rear Insertion Height
630	-0.740452	45	INTERACTION FARM/KIDDING YEAR	Rear Insertion Height
631	0.102822	46	INTERACTION FARM/KIDDING YEAR	Rear Insertion Height
632	-1.65058	47	INTERACTION FARM/KIDDING YEAR	Rear Insertion Height
633	-0.159846	48	INTERACTION FARM/KIDDING YEAR	Rear Insertion Height
634	0.443217	49	INTERACTION FARM/KIDDING YEAR	Rear Insertion Height
635	-0.558811	50	INTERACTION FARM/KIDDING YEAR	Rear Insertion Height
636	-0.0990347	51	INTERACTION FARM/KIDDING YEAR	Rear Insertion Height
637	-0.104542	52	INTERACTION FARM/KIDDING YEAR	Rear Insertion Height
638	0	53	INTERACTION FARM/KIDDING YEAR	Rear Insertion Height
639	-0.401327	54	INTERACTION FARM/KIDDING YEAR	Rear Insertion Height
640	0.200286	55	INTERACTION FARM/KIDDING YEAR	Rear Insertion Height
641	-0.477912	56	INTERACTION FARM/KIDDING YEAR	Rear Insertion Height
642	0.141702	57	INTERACTION FARM/KIDDING YEAR	Rear Insertion Height
643	-0.0207694	58	INTERACTION FARM/KIDDING YEAR	Rear Insertion Height
644	0.368397	59	INTERACTION FARM/KIDDING YEAR	Rear Insertion Height
645	0.0004361	60	INTERACTION FARM/KIDDING YEAR	Rear Insertion Height
646	-0.383	61	INTERACTION FARM/KIDDING YEAR	Rear Insertion Height
647	0.660693	62	INTERACTION FARM/KIDDING YEAR	Rear Insertion Height
648	-0.0818237	63	INTERACTION FARM/KIDDING YEAR	Rear Insertion Height
649	0.0397022	64	INTERACTION FARM/KIDDING YEAR	Rear Insertion Height
650	-0.29341	65	INTERACTION FARM/KIDDING YEAR	Rear Insertion Height
651	0.484909	66	INTERACTION FARM/KIDDING YEAR	Rear Insertion Height
652	-0.104888	67	INTERACTION FARM/KIDDING YEAR	Rear Insertion Height
653	-0.691307	68	INTERACTION FARM/KIDDING YEAR	Rear Insertion Height
654	0.0345048	69	INTERACTION FARM/KIDDING YEAR	Rear Insertion Height
655	-0.785785	70	INTERACTION FARM/KIDDING YEAR	Rear Insertion Height
656	0	71	INTERACTION FARM/KIDDING YEAR	Rear Insertion Height
657	-0.563824	72	INTERACTION FARM/KIDDING YEAR	Rear Insertion Height
658	0.240703	73	INTERACTION FARM/KIDDING YEAR	Rear Insertion Height
659	-0.488266	74	INTERACTION FARM/KIDDING YEAR	Rear Insertion Height
660	0	75	INTERACTION FARM/KIDDING YEAR	Rear Insertion Height
661	0.453175	76	INTERACTION FARM/KIDDING YEAR	Rear Insertion Height
662	0	77	INTERACTION FARM/KIDDING YEAR	Rear Insertion Height
663	0.255827	78	INTERACTION FARM/KIDDING YEAR	Rear Insertion Height
664	0.215235	79	INTERACTION FARM/KIDDING YEAR	Rear Insertion Height
665	0	80	INTERACTION FARM/KIDDING YEAR	Rear Insertion Height
666	0.17848	81	INTERACTION FARM/KIDDING YEAR	Rear Insertion Height
667	1.71598	82	INTERACTION FARM/KIDDING YEAR	Rear Insertion Height
668	0.657412	83	INTERACTION FARM/KIDDING YEAR	Rear Insertion Height
669	-0.192081	84	INTERACTION FARM/KIDDING YEAR	Rear Insertion Height
670	0	85	INTERACTION FARM/KIDDING YEAR	Rear Insertion Height
671	0.986258	86	INTERACTION FARM/KIDDING YEAR	Rear Insertion Height
672	-0.290178	87	INTERACTION FARM/KIDDING YEAR	Rear Insertion Height
673	-0.724151	88	INTERACTION FARM/KIDDING YEAR	Rear Insertion Height
674	0	89	INTERACTION FARM/KIDDING YEAR	Rear Insertion Height
675	0.123544	90	INTERACTION FARM/KIDDING YEAR	Rear Insertion Height
676	0	91	INTERACTION FARM/KIDDING YEAR	Rear Insertion Height
677	-0.211076	92	INTERACTION FARM/KIDDING YEAR	Rear Insertion Height
678	0.149268	93	INTERACTION FARM/KIDDING YEAR	Rear Insertion Height
679	1.34533	94	INTERACTION FARM/KIDDING YEAR	Rear Insertion Height
680	-0.209188	95	INTERACTION FARM/KIDDING YEAR	Rear Insertion Height
681	-1.05296	97	INTERACTION FARM/KIDDING YEAR	Rear Insertion Height
682	-0.375518	98	INTERACTION FARM/KIDDING YEAR	Rear Insertion Height
683	0.431785	99	INTERACTION FARM/KIDDING YEAR	Rear Insertion Height
684	0.75293	100	INTERACTION FARM/KIDDING YEAR	Rear Insertion Height
685	0.97135	101	INTERACTION FARM/KIDDING YEAR	Rear Insertion Height
686	0.681352	102	INTERACTION FARM/KIDDING YEAR	Rear Insertion Height
687	0.876728	103	INTERACTION FARM/KIDDING YEAR	Rear Insertion Height
688	1.80569	104	INTERACTION FARM/KIDDING YEAR	Rear Insertion Height
689	0.628947	105	INTERACTION FARM/KIDDING YEAR	Rear Insertion Height
690	0.418353	106	INTERACTION FARM/KIDDING YEAR	Rear Insertion Height
691	3.10486	107	INTERACTION FARM/KIDDING YEAR	Rear Insertion Height
692	0.222641	108	INTERACTION FARM/KIDDING YEAR	Rear Insertion Height
693	0.290317	109	INTERACTION FARM/KIDDING YEAR	Rear Insertion Height
694	0	110	INTERACTION FARM/KIDDING YEAR	Rear Insertion Height
695	1.51253	111	INTERACTION FARM/KIDDING YEAR	Rear Insertion Height
696	-0.323352	112	INTERACTION FARM/KIDDING YEAR	Rear Insertion Height
697	-0.884921	113	INTERACTION FARM/KIDDING YEAR	Rear Insertion Height
698	-0.254289	114	INTERACTION FARM/KIDDING YEAR	Rear Insertion Height
699	0.14349	115	INTERACTION FARM/KIDDING YEAR	Rear Insertion Height
700	0	116	INTERACTION FARM/KIDDING YEAR	Rear Insertion Height
701	-0.785653	117	INTERACTION FARM/KIDDING YEAR	Rear Insertion Height
702	0.0333675	118	INTERACTION FARM/KIDDING YEAR	Rear Insertion Height
703	0.321062	119	INTERACTION FARM/KIDDING YEAR	Rear Insertion Height
704	0.189169	120	INTERACTION FARM/KIDDING YEAR	Rear Insertion Height
705	2.92109	121	INTERACTION FARM/KIDDING YEAR	Rear Insertion Height
706	0.237918	122	INTERACTION FARM/KIDDING YEAR	Rear Insertion Height
707	1.59612	123	INTERACTION FARM/KIDDING YEAR	Rear Insertion Height
708	2.60938	124	INTERACTION FARM/KIDDING YEAR	Rear Insertion Height
709	3.38204	125	INTERACTION FARM/KIDDING YEAR	Rear Insertion Height
710	0.139831	126	INTERACTION FARM/KIDDING YEAR	Rear Insertion Height
711	0.227251	127	INTERACTION FARM/KIDDING YEAR	Rear Insertion Height
712	-0.312897	128	INTERACTION FARM/KIDDING YEAR	Rear Insertion Height
713	0.784845	129	INTERACTION FARM/KIDDING YEAR	Rear Insertion Height
714	0.733883	130	INTERACTION FARM/KIDDING YEAR	Rear Insertion Height
715	-0.493146	131	INTERACTION FARM/KIDDING YEAR	Rear Insertion Height
716	-0.244373	132	INTERACTION FARM/KIDDING YEAR	Rear Insertion Height
717	-0.039632	133	INTERACTION FARM/KIDDING YEAR	Rear Insertion Height
718	1.68387	134	INTERACTION FARM/KIDDING YEAR	Rear Insertion Height
719	0.533774	135	INTERACTION FARM/KIDDING YEAR	Rear Insertion Height
720	0.748606	136	INTERACTION FARM/KIDDING YEAR	Rear Insertion Height
721	0	137	INTERACTION FARM/KIDDING YEAR	Rear Insertion Height
722	-0.36914	138	INTERACTION FARM/KIDDING YEAR	Rear Insertion Height
723	0.207253	139	INTERACTION FARM/KIDDING YEAR	Rear Insertion Height
724	-0.490463	140	INTERACTION FARM/KIDDING YEAR	Rear Insertion Height
725	0	141	INTERACTION FARM/KIDDING YEAR	Rear Insertion Height
726	0.381867	142	INTERACTION FARM/KIDDING YEAR	Rear Insertion Height
727	0.0300647	143	INTERACTION FARM/KIDDING YEAR	Rear Insertion Height
728	0.0525097	144	INTERACTION FARM/KIDDING YEAR	Rear Insertion Height
729	-0.151902	145	INTERACTION FARM/KIDDING YEAR	Rear Insertion Height
730	0.438917	146	INTERACTION FARM/KIDDING YEAR	Rear Insertion Height
731	-0.0123856	147	INTERACTION FARM/KIDDING YEAR	Rear Insertion Height
732	-0.147994	148	INTERACTION FARM/KIDDING YEAR	Rear Insertion Height
733	0.244004	149	INTERACTION FARM/KIDDING YEAR	Rear Insertion Height
734	-1.04442	150	INTERACTION FARM/KIDDING YEAR	Rear Insertion Height
735	0.318471	151	INTERACTION FARM/KIDDING YEAR	Rear Insertion Height
736	0.210569	152	INTERACTION FARM/KIDDING YEAR	Rear Insertion Height
737	0.334819	153	INTERACTION FARM/KIDDING YEAR	Rear Insertion Height
738	0.21227	154	INTERACTION FARM/KIDDING YEAR	Rear Insertion Height
739	-0.247855	155	INTERACTION FARM/KIDDING YEAR	Rear Insertion Height
740	0.374764	156	INTERACTION FARM/KIDDING YEAR	Rear Insertion Height
741	-0.04359	157	INTERACTION FARM/KIDDING YEAR	Rear Insertion Height
742	0.402682	158	INTERACTION FARM/KIDDING YEAR	Rear Insertion Height
743	0.660246	160	INTERACTION FARM/KIDDING YEAR	Rear Insertion Height
744	1.42143	161	INTERACTION FARM/KIDDING YEAR	Rear Insertion Height
745	0.418702	162	INTERACTION FARM/KIDDING YEAR	Rear Insertion Height
746	0.556186	163	INTERACTION FARM/KIDDING YEAR	Rear Insertion Height
747	2.09898	164	INTERACTION FARM/KIDDING YEAR	Rear Insertion Height
748	0.177425	165	INTERACTION FARM/KIDDING YEAR	Rear Insertion Height
749	0.0716373	166	INTERACTION FARM/KIDDING YEAR	Rear Insertion Height
750	0.108677	167	INTERACTION FARM/KIDDING YEAR	Rear Insertion Height
751	0.445294	168	INTERACTION FARM/KIDDING YEAR	Rear Insertion Height
752	0	169	INTERACTION FARM/KIDDING YEAR	Rear Insertion Height
753	0.117219	170	INTERACTION FARM/KIDDING YEAR	Rear Insertion Height
754	0	171	INTERACTION FARM/KIDDING YEAR	Rear Insertion Height
755	-0.12633	172	INTERACTION FARM/KIDDING YEAR	Rear Insertion Height
756	-0.492995	173	INTERACTION FARM/KIDDING YEAR	Rear Insertion Height
757	-0.406156	174	INTERACTION FARM/KIDDING YEAR	Rear Insertion Height
758	0	175	INTERACTION FARM/KIDDING YEAR	Rear Insertion Height
759	0.0234352	176	INTERACTION FARM/KIDDING YEAR	Rear Insertion Height
760	-0.213646	177	INTERACTION FARM/KIDDING YEAR	Rear Insertion Height
761	-0.553711	178	INTERACTION FARM/KIDDING YEAR	Rear Insertion Height
762	-0.236705	179	INTERACTION FARM/KIDDING YEAR	Rear Insertion Height
763	0	180	INTERACTION FARM/KIDDING YEAR	Rear Insertion Height
764	-0.150929	181	INTERACTION FARM/KIDDING YEAR	Rear Insertion Height
765	0.107214	183	INTERACTION FARM/KIDDING YEAR	Rear Insertion Height
766	0.29716	184	INTERACTION FARM/KIDDING YEAR	Rear Insertion Height
767	-0.395918	185	INTERACTION FARM/KIDDING YEAR	Rear Insertion Height
768	-0.035371	186	INTERACTION FARM/KIDDING YEAR	Rear Insertion Height
769	-0.229455	187	INTERACTION FARM/KIDDING YEAR	Rear Insertion Height
770	0	188	INTERACTION FARM/KIDDING YEAR	Rear Insertion Height
771	0	189	INTERACTION FARM/KIDDING YEAR	Rear Insertion Height
772	-0.140046	190	INTERACTION FARM/KIDDING YEAR	Rear Insertion Height
773	-0.0782666	191	INTERACTION FARM/KIDDING YEAR	Rear Insertion Height
774	0.0840032	192	INTERACTION FARM/KIDDING YEAR	Rear Insertion Height
775	-0.145672	193	INTERACTION FARM/KIDDING YEAR	Rear Insertion Height
776	1.25243	194	INTERACTION FARM/KIDDING YEAR	Rear Insertion Height
777	-0.078697	195	INTERACTION FARM/KIDDING YEAR	Rear Insertion Height
778	-0.0109807	196	INTERACTION FARM/KIDDING YEAR	Rear Insertion Height
779	-0.419516	197	INTERACTION FARM/KIDDING YEAR	Rear Insertion Height
780	-0.539392	198	INTERACTION FARM/KIDDING YEAR	Rear Insertion Height
781	0.822689	199	INTERACTION FARM/KIDDING YEAR	Rear Insertion Height
782	-0.232079	200	INTERACTION FARM/KIDDING YEAR	Rear Insertion Height
783	-0.338652	201	INTERACTION FARM/KIDDING YEAR	Rear Insertion Height
784	-0.548715	202	INTERACTION FARM/KIDDING YEAR	Rear Insertion Height
785	-0.720051	203	INTERACTION FARM/KIDDING YEAR	Rear Insertion Height
786	0.112354	204	INTERACTION FARM/KIDDING YEAR	Rear Insertion Height
787	0.82851	205	INTERACTION FARM/KIDDING YEAR	Rear Insertion Height
788	-0.623753	206	INTERACTION FARM/KIDDING YEAR	Rear Insertion Height
789	-0.953478	207	INTERACTION FARM/KIDDING YEAR	Rear Insertion Height
790	0	208	INTERACTION FARM/KIDDING YEAR	Rear Insertion Height
791	0.0749855	209	INTERACTION FARM/KIDDING YEAR	Rear Insertion Height
792	0.260651	210	INTERACTION FARM/KIDDING YEAR	Rear Insertion Height
793	1.16651	211	INTERACTION FARM/KIDDING YEAR	Rear Insertion Height
794	-0.269692	212	INTERACTION FARM/KIDDING YEAR	Rear Insertion Height
795	0.269799	213	INTERACTION FARM/KIDDING YEAR	Rear Insertion Height
796	-0.303371	214	INTERACTION FARM/KIDDING YEAR	Rear Insertion Height
797	-0.344356	215	INTERACTION FARM/KIDDING YEAR	Rear Insertion Height
798	1.04332	216	INTERACTION FARM/KIDDING YEAR	Rear Insertion Height
799	-0.257883	217	INTERACTION FARM/KIDDING YEAR	Rear Insertion Height
800	1.14104	218	INTERACTION FARM/KIDDING YEAR	Rear Insertion Height
801	-0.134374	219	INTERACTION FARM/KIDDING YEAR	Rear Insertion Height
802	-0.293835	220	INTERACTION FARM/KIDDING YEAR	Rear Insertion Height
803	-0.558583	221	INTERACTION FARM/KIDDING YEAR	Rear Insertion Height
804	-0.33352	222	INTERACTION FARM/KIDDING YEAR	Rear Insertion Height
805	0.432807	223	INTERACTION FARM/KIDDING YEAR	Rear Insertion Height
806	-0.0200546	224	INTERACTION FARM/KIDDING YEAR	Rear Insertion Height
807	-0.252826	225	INTERACTION FARM/KIDDING YEAR	Rear Insertion Height
808	0.0116932	226	INTERACTION FARM/KIDDING YEAR	Rear Insertion Height
809	-0.292411	227	INTERACTION FARM/KIDDING YEAR	Rear Insertion Height
810	-0.131476	228	INTERACTION FARM/KIDDING YEAR	Rear Insertion Height
811	-0.190007	229	INTERACTION FARM/KIDDING YEAR	Rear Insertion Height
812	0	230	INTERACTION FARM/KIDDING YEAR	Rear Insertion Height
813	-0.0391781	231	INTERACTION FARM/KIDDING YEAR	Rear Insertion Height
814	-0.614759	232	INTERACTION FARM/KIDDING YEAR	Rear Insertion Height
815	-0.518455	233	INTERACTION FARM/KIDDING YEAR	Rear Insertion Height
816	0.0934204	234	INTERACTION FARM/KIDDING YEAR	Rear Insertion Height
817	-0.704857	235	INTERACTION FARM/KIDDING YEAR	Rear Insertion Height
818	-0.825203	236	INTERACTION FARM/KIDDING YEAR	Rear Insertion Height
819	-0.746238	237	INTERACTION FARM/KIDDING YEAR	Rear Insertion Height
820	-0.39799	238	INTERACTION FARM/KIDDING YEAR	Rear Insertion Height
821	-0.243242	239	INTERACTION FARM/KIDDING YEAR	Rear Insertion Height
822	-0.211281	240	INTERACTION FARM/KIDDING YEAR	Rear Insertion Height
823	0	241	INTERACTION FARM/KIDDING YEAR	Rear Insertion Height
824	-0.665137	242	INTERACTION FARM/KIDDING YEAR	Rear Insertion Height
825	-0.24387	243	INTERACTION FARM/KIDDING YEAR	Rear Insertion Height
826	-0.258784	244	INTERACTION FARM/KIDDING YEAR	Rear Insertion Height
827	0.274233	245	INTERACTION FARM/KIDDING YEAR	Rear Insertion Height
828	0.281695	246	INTERACTION FARM/KIDDING YEAR	Rear Insertion Height
829	-0.702749	247	INTERACTION FARM/KIDDING YEAR	Rear Insertion Height
830	-0.189171	248	INTERACTION FARM/KIDDING YEAR	Rear Insertion Height
831	-0.253314	249	INTERACTION FARM/KIDDING YEAR	Rear Insertion Height
832	0.633114	250	INTERACTION FARM/KIDDING YEAR	Rear Insertion Height
833	0	251	INTERACTION FARM/KIDDING YEAR	Rear Insertion Height
834	-0.206869	252	INTERACTION FARM/KIDDING YEAR	Rear Insertion Height
835	-0.452904	253	INTERACTION FARM/KIDDING YEAR	Rear Insertion Height
836	0	254	INTERACTION FARM/KIDDING YEAR	Rear Insertion Height
837	-0.029567	255	INTERACTION FARM/KIDDING YEAR	Rear Insertion Height
838	-0.46745	256	INTERACTION FARM/KIDDING YEAR	Rear Insertion Height
839	-0.115077	257	INTERACTION FARM/KIDDING YEAR	Rear Insertion Height
840	0.206283	258	INTERACTION FARM/KIDDING YEAR	Rear Insertion Height
841	0.862971	259	INTERACTION FARM/KIDDING YEAR	Rear Insertion Height
842	1.2007	260	INTERACTION FARM/KIDDING YEAR	Rear Insertion Height
843	-0.113138	261	INTERACTION FARM/KIDDING YEAR	Rear Insertion Height
844	0.0897033	262	INTERACTION FARM/KIDDING YEAR	Rear Insertion Height
845	1.32419	263	INTERACTION FARM/KIDDING YEAR	Rear Insertion Height
846	0.395582	264	INTERACTION FARM/KIDDING YEAR	Rear Insertion Height
847	0.791891	265	INTERACTION FARM/KIDDING YEAR	Rear Insertion Height
848	0.872695	266	INTERACTION FARM/KIDDING YEAR	Rear Insertion Height
849	-0.143748	267	INTERACTION FARM/KIDDING YEAR	Rear Insertion Height
850	-0.160929	268	INTERACTION FARM/KIDDING YEAR	Rear Insertion Height
851	0.0977728	269	INTERACTION FARM/KIDDING YEAR	Rear Insertion Height
852	0.068886	270	INTERACTION FARM/KIDDING YEAR	Rear Insertion Height
853	0.067318	271	INTERACTION FARM/KIDDING YEAR	Rear Insertion Height
854	0.358676	272	INTERACTION FARM/KIDDING YEAR	Rear Insertion Height
855	-0.297696	273	INTERACTION FARM/KIDDING YEAR	Rear Insertion Height
856	0.152474	274	INTERACTION FARM/KIDDING YEAR	Rear Insertion Height
857	0.0380898	275	INTERACTION FARM/KIDDING YEAR	Rear Insertion Height
858	0.21027	276	INTERACTION FARM/KIDDING YEAR	Rear Insertion Height
859	0.0536853	277	INTERACTION FARM/KIDDING YEAR	Rear Insertion Height
860	0.140627	278	INTERACTION FARM/KIDDING YEAR	Rear Insertion Height
861	0.252411	279	INTERACTION FARM/KIDDING YEAR	Rear Insertion Height
862	0.231579	280	INTERACTION FARM/KIDDING YEAR	Rear Insertion Height
863	1.21556	281	INTERACTION FARM/KIDDING YEAR	Rear Insertion Height
864	0	282	INTERACTION FARM/KIDDING YEAR	Rear Insertion Height
865	0.55749	283	INTERACTION FARM/KIDDING YEAR	Rear Insertion Height
866	0.762429	284	INTERACTION FARM/KIDDING YEAR	Rear Insertion Height
867	0.0790543	285	INTERACTION FARM/KIDDING YEAR	Rear Insertion Height
868	0.358155	286	INTERACTION FARM/KIDDING YEAR	Rear Insertion Height
869	-0.134063	287	INTERACTION FARM/KIDDING YEAR	Rear Insertion Height
870	0	288	INTERACTION FARM/KIDDING YEAR	Rear Insertion Height
871	-0.29422	289	INTERACTION FARM/KIDDING YEAR	Rear Insertion Height
872	-0.171261	290	INTERACTION FARM/KIDDING YEAR	Rear Insertion Height
873	0	291	INTERACTION FARM/KIDDING YEAR	Rear Insertion Height
874	0.0628082	292	INTERACTION FARM/KIDDING YEAR	Rear Insertion Height
875	0.00604952	293	INTERACTION FARM/KIDDING YEAR	Rear Insertion Height
876	0	294	INTERACTION FARM/KIDDING YEAR	Rear Insertion Height
877	-0.156728	295	INTERACTION FARM/KIDDING YEAR	Rear Insertion Height
878	0.579101	296	INTERACTION FARM/KIDDING YEAR	Rear Insertion Height
879	0.205937	297	INTERACTION FARM/KIDDING YEAR	Rear Insertion Height
880	0	298	INTERACTION FARM/KIDDING YEAR	Rear Insertion Height
881	-0.167879	299	INTERACTION FARM/KIDDING YEAR	Rear Insertion Height
882	-0.257104	300	INTERACTION FARM/KIDDING YEAR	Rear Insertion Height
883	-0.53896	301	INTERACTION FARM/KIDDING YEAR	Rear Insertion Height
884	0.00778358	302	INTERACTION FARM/KIDDING YEAR	Rear Insertion Height
885	-0.016899	303	INTERACTION FARM/KIDDING YEAR	Rear Insertion Height
886	-0.0449106	304	INTERACTION FARM/KIDDING YEAR	Rear Insertion Height
887	0.287745	305	INTERACTION FARM/KIDDING YEAR	Rear Insertion Height
888	0.1007	306	INTERACTION FARM/KIDDING YEAR	Rear Insertion Height
889	0.0738819	307	INTERACTION FARM/KIDDING YEAR	Rear Insertion Height
890	0.760623	308	INTERACTION FARM/KIDDING YEAR	Rear Insertion Height
891	0	309	INTERACTION FARM/KIDDING YEAR	Rear Insertion Height
892	0	310	INTERACTION FARM/KIDDING YEAR	Rear Insertion Height
893	-0.219743	311	INTERACTION FARM/KIDDING YEAR	Rear Insertion Height
894	-0.141152	312	INTERACTION FARM/KIDDING YEAR	Rear Insertion Height
895	-0.317477	313	INTERACTION FARM/KIDDING YEAR	Rear Insertion Height
896	0.0363068	314	INTERACTION FARM/KIDDING YEAR	Rear Insertion Height
897	0.378231	315	INTERACTION FARM/KIDDING YEAR	Rear Insertion Height
898	-0.200461	316	INTERACTION FARM/KIDDING YEAR	Rear Insertion Height
899	0	317	INTERACTION FARM/KIDDING YEAR	Rear Insertion Height
900	-0.189423	318	INTERACTION FARM/KIDDING YEAR	Rear Insertion Height
901	0.192639	319	INTERACTION FARM/KIDDING YEAR	Rear Insertion Height
902	0.487779	320	INTERACTION FARM/KIDDING YEAR	Rear Insertion Height
903	0.646014	321	INTERACTION FARM/KIDDING YEAR	Rear Insertion Height
904	0.0266577	322	INTERACTION FARM/KIDDING YEAR	Rear Insertion Height
905	-0.380806	323	INTERACTION FARM/KIDDING YEAR	Rear Insertion Height
906	0.0739618	324	INTERACTION FARM/KIDDING YEAR	Rear Insertion Height
907	0	325	INTERACTION FARM/KIDDING YEAR	Rear Insertion Height
908	0.303377	326	INTERACTION FARM/KIDDING YEAR	Rear Insertion Height
909	-0.288597	327	INTERACTION FARM/KIDDING YEAR	Rear Insertion Height
910	1.28642	328	INTERACTION FARM/KIDDING YEAR	Rear Insertion Height
911	0.277709	329	INTERACTION FARM/KIDDING YEAR	Rear Insertion Height
912	0.349331	330	INTERACTION FARM/KIDDING YEAR	Rear Insertion Height
913	0	331	INTERACTION FARM/KIDDING YEAR	Rear Insertion Height
914	0.102297	332	INTERACTION FARM/KIDDING YEAR	Rear Insertion Height
915	-0.166716	333	INTERACTION FARM/KIDDING YEAR	Rear Insertion Height
916	-0.139122	334	INTERACTION FARM/KIDDING YEAR	Rear Insertion Height
917	-0.451477	335	INTERACTION FARM/KIDDING YEAR	Rear Insertion Height
918	-0.0958483	336	INTERACTION FARM/KIDDING YEAR	Rear Insertion Height
919	-0.125495	337	INTERACTION FARM/KIDDING YEAR	Rear Insertion Height
920	0.298524	338	INTERACTION FARM/KIDDING YEAR	Rear Insertion Height
921	0.339125	339	INTERACTION FARM/KIDDING YEAR	Rear Insertion Height
922	0.609471	340	INTERACTION FARM/KIDDING YEAR	Rear Insertion Height
923	0	341	INTERACTION FARM/KIDDING YEAR	Rear Insertion Height
924	-0.13695	342	INTERACTION FARM/KIDDING YEAR	Rear Insertion Height
925	0.271755	343	INTERACTION FARM/KIDDING YEAR	Rear Insertion Height
926	0.205808	344	INTERACTION FARM/KIDDING YEAR	Rear Insertion Height
927	0.923471	345	INTERACTION FARM/KIDDING YEAR	Rear Insertion Height
928	0.833983	346	INTERACTION FARM/KIDDING YEAR	Rear Insertion Height
929	0.0425015	347	INTERACTION FARM/KIDDING YEAR	Rear Insertion Height
930	0.00846476	348	INTERACTION FARM/KIDDING YEAR	Rear Insertion Height
931	0	349	INTERACTION FARM/KIDDING YEAR	Rear Insertion Height
932	-0.294318	350	INTERACTION FARM/KIDDING YEAR	Rear Insertion Height
933	-0.87302	351	INTERACTION FARM/KIDDING YEAR	Rear Insertion Height
934	-0.0371568	352	INTERACTION FARM/KIDDING YEAR	Rear Insertion Height
935	-0.078018	353	INTERACTION FARM/KIDDING YEAR	Rear Insertion Height
936	0.14794	354	INTERACTION FARM/KIDDING YEAR	Rear Insertion Height
937	0.0933623	355	INTERACTION FARM/KIDDING YEAR	Rear Insertion Height
938	-0.204612	356	INTERACTION FARM/KIDDING YEAR	Rear Insertion Height
939	-0.225592	357	INTERACTION FARM/KIDDING YEAR	Rear Insertion Height
940	-0.0153109	358	INTERACTION FARM/KIDDING YEAR	Rear Insertion Height
941	0	359	INTERACTION FARM/KIDDING YEAR	Rear Insertion Height
942	0.39436	360	INTERACTION FARM/KIDDING YEAR	Rear Insertion Height
943	0	361	INTERACTION FARM/KIDDING YEAR	Rear Insertion Height
944	0	362	INTERACTION FARM/KIDDING YEAR	Rear Insertion Height
945	-0.210158	363	INTERACTION FARM/KIDDING YEAR	Rear Insertion Height
946	0	364	INTERACTION FARM/KIDDING YEAR	Rear Insertion Height
947	0.0564052	365	INTERACTION FARM/KIDDING YEAR	Rear Insertion Height
948	0	366	INTERACTION FARM/KIDDING YEAR	Rear Insertion Height
949	0	367	INTERACTION FARM/KIDDING YEAR	Rear Insertion Height
950	0	368	INTERACTION FARM/KIDDING YEAR	Rear Insertion Height
951	0.00205032	369	INTERACTION FARM/KIDDING YEAR	Rear Insertion Height
952	0.81701	370	INTERACTION FARM/KIDDING YEAR	Rear Insertion Height
953	0.351827	371	INTERACTION FARM/KIDDING YEAR	Rear Insertion Height
954	-0.427373	372	INTERACTION FARM/KIDDING YEAR	Rear Insertion Height
955	0	373	INTERACTION FARM/KIDDING YEAR	Rear Insertion Height
956	0	374	INTERACTION FARM/KIDDING YEAR	Rear Insertion Height
957	0.243297	375	INTERACTION FARM/KIDDING YEAR	Rear Insertion Height
958	0	376	INTERACTION FARM/KIDDING YEAR	Rear Insertion Height
959	0	377	INTERACTION FARM/KIDDING YEAR	Rear Insertion Height
960	0.0356062	378	INTERACTION FARM/KIDDING YEAR	Rear Insertion Height
961	0	379	INTERACTION FARM/KIDDING YEAR	Rear Insertion Height
962	0	380	INTERACTION FARM/KIDDING YEAR	Rear Insertion Height
963	-0.208813	381	INTERACTION FARM/KIDDING YEAR	Rear Insertion Height
964	0.365935	382	INTERACTION FARM/KIDDING YEAR	Rear Insertion Height
965	0	383	INTERACTION FARM/KIDDING YEAR	Rear Insertion Height
966	-0.578463	384	INTERACTION FARM/KIDDING YEAR	Rear Insertion Height
967	-0.500084	385	INTERACTION FARM/KIDDING YEAR	Rear Insertion Height
968	-0.156041	386	INTERACTION FARM/KIDDING YEAR	Rear Insertion Height
969	0	387	INTERACTION FARM/KIDDING YEAR	Rear Insertion Height
970	-0.675815	388	INTERACTION FARM/KIDDING YEAR	Rear Insertion Height
971	-0.0917527	389	INTERACTION FARM/KIDDING YEAR	Rear Insertion Height
972	0.251662	390	INTERACTION FARM/KIDDING YEAR	Rear Insertion Height
973	0	391	INTERACTION FARM/KIDDING YEAR	Rear Insertion Height
974	-0.527474	393	INTERACTION FARM/KIDDING YEAR	Rear Insertion Height
975	0	394	INTERACTION FARM/KIDDING YEAR	Rear Insertion Height
976	0	395	INTERACTION FARM/KIDDING YEAR	Rear Insertion Height
977	0	396	INTERACTION FARM/KIDDING YEAR	Rear Insertion Height
978	-0.0684106	397	INTERACTION FARM/KIDDING YEAR	Rear Insertion Height
979	0	398	INTERACTION FARM/KIDDING YEAR	Rear Insertion Height
980	-0.347983	399	INTERACTION FARM/KIDDING YEAR	Rear Insertion Height
981	-0.326605	400	INTERACTION FARM/KIDDING YEAR	Rear Insertion Height
982	-0.112549	401	INTERACTION FARM/KIDDING YEAR	Rear Insertion Height
983	0.38059	402	INTERACTION FARM/KIDDING YEAR	Rear Insertion Height
984	0	403	INTERACTION FARM/KIDDING YEAR	Rear Insertion Height
985	0.268171	404	INTERACTION FARM/KIDDING YEAR	Rear Insertion Height
986	0	405	INTERACTION FARM/KIDDING YEAR	Rear Insertion Height
1	0.250497	COVARIATE REGRESSION COEFFICIENT	AGE 1	Rump Width
2	-0.0375885	COVARIATE REGRESSION COEFFICIENT	AGE 2	Rump Width
3	0.00220626	COVARIATE REGRESSION COEFFICIENT	DAYS IN MILK	Rump Width
4	0.0130315	COVARIATE REGRESSION COEFFICIENT	AGE 1	Rump Angle
5	-0.0118557	COVARIATE REGRESSION COEFFICIENT	AGE 2	Rump Angle
6	0.00100887	COVARIATE REGRESSION COEFFICIENT	DAYS IN MILK	Rump Angle
7	-0.142586	1	FARM	Rump Width
8	0.461352	2	FARM	Rump Width
9	0	3	FARM	Rump Width
10	0.690423	4	FARM	Rump Width
11	0.00087314	5	FARM	Rump Width
12	1.08462	6	FARM	Rump Width
13	0	7	FARM	Rump Width
14	-0.226883	8	FARM	Rump Width
15	0.410111	9	FARM	Rump Width
16	-0.213856	10	FARM	Rump Width
17	1.1139	13	FARM	Rump Width
18	0	14	FARM	Rump Width
19	-0.489861	15	FARM	Rump Width
20	0	16	FARM	Rump Width
21	0.521211	17	FARM	Rump Width
22	-0.0334033	18	FARM	Rump Width
23	0.0527215	19	FARM	Rump Width
24	0.879781	20	FARM	Rump Width
25	0.601568	21	FARM	Rump Width
26	0.127168	23	FARM	Rump Width
27	0.315536	24	FARM	Rump Width
28	0.677706	25	FARM	Rump Width
29	0	26	FARM	Rump Width
30	0.935261	27	FARM	Rump Width
31	0.90562	28	FARM	Rump Width
32	0.906316	29	FARM	Rump Width
33	0	30	FARM	Rump Width
34	-0.163264	31	FARM	Rump Width
35	0.659657	32	FARM	Rump Width
36	0	33	FARM	Rump Width
37	0.65574	34	FARM	Rump Width
38	0.592696	35	FARM	Rump Width
39	0.428654	36	FARM	Rump Width
40	0	38	FARM	Rump Width
41	0.0618854	39	FARM	Rump Width
42	1.2167	40	FARM	Rump Width
43	0.224859	41	FARM	Rump Width
44	0.144219	42	FARM	Rump Width
45	-0.754894	43	FARM	Rump Width
46	0.166644	44	FARM	Rump Width
47	0.287372	45	FARM	Rump Width
48	0.498407	48	FARM	Rump Width
49	0	49	FARM	Rump Width
50	0	50	FARM	Rump Width
51	0.395649	51	FARM	Rump Width
52	0.466183	52	FARM	Rump Width
53	0.359344	53	FARM	Rump Width
54	0.550379	54	FARM	Rump Width
55	0.0597706	55	FARM	Rump Width
56	0.541893	56	FARM	Rump Width
57	1.13461	57	FARM	Rump Width
58	-0.189658	58	FARM	Rump Width
59	0.375599	59	FARM	Rump Width
60	-0.403014	60	FARM	Rump Width
61	0.847275	61	FARM	Rump Width
62	0.929706	62	FARM	Rump Width
63	0.295067	63	FARM	Rump Width
64	0.229801	64	FARM	Rump Width
65	0.636249	65	FARM	Rump Width
66	0.827997	66	FARM	Rump Width
67	0.8178	68	FARM	Rump Width
68	-0.713689	69	FARM	Rump Width
69	0	70	FARM	Rump Width
70	0	71	FARM	Rump Width
71	-1.08055	73	FARM	Rump Width
72	0	74	FARM	Rump Width
73	0.0417573	75	FARM	Rump Width
74	0.361289	76	FARM	Rump Width
75	0.331873	78	FARM	Rump Width
76	0.0367376	79	FARM	Rump Width
77	-1.51995	80	FARM	Rump Width
78	-0.124103	81	FARM	Rump Width
79	0	82	FARM	Rump Width
80	0	83	FARM	Rump Width
81	0.498504	84	FARM	Rump Width
82	0.339009	85	FARM	Rump Width
83	-0.175142	1	LACTATION STAGE	Rump Width
84	0	2	LACTATION STAGE	Rump Width
85	-0.217232	1	KIDDING MONTH	Rump Width
86	-0.25012	2	KIDDING MONTH	Rump Width
87	-0.273735	3	KIDDING MONTH	Rump Width
88	-0.186453	4	KIDDING MONTH	Rump Width
89	-0.190424	5	KIDDING MONTH	Rump Width
90	-0.119452	6	KIDDING MONTH	Rump Width
91	-0.0570716	7	KIDDING MONTH	Rump Width
92	-0.0125909	8	KIDDING MONTH	Rump Width
93	-0.0496142	9	KIDDING MONTH	Rump Width
94	-0.0545216	10	KIDDING MONTH	Rump Width
95	-0.0538876	11	KIDDING MONTH	Rump Width
96	0	12	KIDDING MONTH	Rump Width
97	0	1	INTERACTION FARM/KIDDING YEAR	Rump Width
98	0	2	INTERACTION FARM/KIDDING YEAR	Rump Width
99	0.298126	3	INTERACTION FARM/KIDDING YEAR	Rump Width
100	-1.22243	4	INTERACTION FARM/KIDDING YEAR	Rump Width
101	-1.85734	5	INTERACTION FARM/KIDDING YEAR	Rump Width
102	0.519171	7	INTERACTION FARM/KIDDING YEAR	Rump Width
103	-2.94018	8	INTERACTION FARM/KIDDING YEAR	Rump Width
104	-4.94808	9	INTERACTION FARM/KIDDING YEAR	Rump Width
105	-1.16529	10	INTERACTION FARM/KIDDING YEAR	Rump Width
106	0	11	INTERACTION FARM/KIDDING YEAR	Rump Width
107	-1.97527	12	INTERACTION FARM/KIDDING YEAR	Rump Width
108	-3.77254	13	INTERACTION FARM/KIDDING YEAR	Rump Width
109	0.261908	14	INTERACTION FARM/KIDDING YEAR	Rump Width
110	-0.221717	15	INTERACTION FARM/KIDDING YEAR	Rump Width
111	0	16	INTERACTION FARM/KIDDING YEAR	Rump Width
112	-1.86986	17	INTERACTION FARM/KIDDING YEAR	Rump Width
113	0	18	INTERACTION FARM/KIDDING YEAR	Rump Width
114	-0.531542	19	INTERACTION FARM/KIDDING YEAR	Rump Width
115	0	20	INTERACTION FARM/KIDDING YEAR	Rump Width
116	-0.489019	21	INTERACTION FARM/KIDDING YEAR	Rump Width
117	-0.225412	22	INTERACTION FARM/KIDDING YEAR	Rump Width
118	0	23	INTERACTION FARM/KIDDING YEAR	Rump Width
119	-0.685799	24	INTERACTION FARM/KIDDING YEAR	Rump Width
120	-0.754467	25	INTERACTION FARM/KIDDING YEAR	Rump Width
121	-1.32804	26	INTERACTION FARM/KIDDING YEAR	Rump Width
122	0.238216	27	INTERACTION FARM/KIDDING YEAR	Rump Width
123	-1.63878	28	INTERACTION FARM/KIDDING YEAR	Rump Width
124	-0.378434	29	INTERACTION FARM/KIDDING YEAR	Rump Width
125	-0.648283	30	INTERACTION FARM/KIDDING YEAR	Rump Width
126	-0.595218	31	INTERACTION FARM/KIDDING YEAR	Rump Width
127	0	32	INTERACTION FARM/KIDDING YEAR	Rump Width
128	-1.2528	33	INTERACTION FARM/KIDDING YEAR	Rump Width
129	-2.00238	34	INTERACTION FARM/KIDDING YEAR	Rump Width
130	0.31272	35	INTERACTION FARM/KIDDING YEAR	Rump Width
131	0.615271	36	INTERACTION FARM/KIDDING YEAR	Rump Width
132	-1.28746	37	INTERACTION FARM/KIDDING YEAR	Rump Width
133	-0.383437	38	INTERACTION FARM/KIDDING YEAR	Rump Width
134	-1.05933	39	INTERACTION FARM/KIDDING YEAR	Rump Width
135	-0.708785	40	INTERACTION FARM/KIDDING YEAR	Rump Width
136	-0.98142	41	INTERACTION FARM/KIDDING YEAR	Rump Width
137	0.124811	42	INTERACTION FARM/KIDDING YEAR	Rump Width
138	-0.515534	43	INTERACTION FARM/KIDDING YEAR	Rump Width
139	-0.939657	44	INTERACTION FARM/KIDDING YEAR	Rump Width
140	0.34499	45	INTERACTION FARM/KIDDING YEAR	Rump Width
141	-0.877663	46	INTERACTION FARM/KIDDING YEAR	Rump Width
142	0.490992	47	INTERACTION FARM/KIDDING YEAR	Rump Width
143	-0.842204	48	INTERACTION FARM/KIDDING YEAR	Rump Width
144	-1.42066	49	INTERACTION FARM/KIDDING YEAR	Rump Width
145	-0.4724	50	INTERACTION FARM/KIDDING YEAR	Rump Width
146	-0.181072	51	INTERACTION FARM/KIDDING YEAR	Rump Width
147	-0.227407	52	INTERACTION FARM/KIDDING YEAR	Rump Width
148	0	53	INTERACTION FARM/KIDDING YEAR	Rump Width
149	-0.167068	54	INTERACTION FARM/KIDDING YEAR	Rump Width
150	0.0482547	55	INTERACTION FARM/KIDDING YEAR	Rump Width
151	-0.223121	56	INTERACTION FARM/KIDDING YEAR	Rump Width
152	-0.264147	57	INTERACTION FARM/KIDDING YEAR	Rump Width
153	-0.438166	58	INTERACTION FARM/KIDDING YEAR	Rump Width
154	-0.911142	59	INTERACTION FARM/KIDDING YEAR	Rump Width
155	-0.187441	60	INTERACTION FARM/KIDDING YEAR	Rump Width
156	-0.560297	61	INTERACTION FARM/KIDDING YEAR	Rump Width
157	-0.912583	62	INTERACTION FARM/KIDDING YEAR	Rump Width
158	-0.246898	63	INTERACTION FARM/KIDDING YEAR	Rump Width
159	-0.733605	64	INTERACTION FARM/KIDDING YEAR	Rump Width
160	-0.205843	65	INTERACTION FARM/KIDDING YEAR	Rump Width
161	-0.520077	66	INTERACTION FARM/KIDDING YEAR	Rump Width
162	-0.367704	67	INTERACTION FARM/KIDDING YEAR	Rump Width
163	-0.221127	68	INTERACTION FARM/KIDDING YEAR	Rump Width
164	0.0638631	69	INTERACTION FARM/KIDDING YEAR	Rump Width
165	-0.562264	70	INTERACTION FARM/KIDDING YEAR	Rump Width
166	0	71	INTERACTION FARM/KIDDING YEAR	Rump Width
167	-0.339959	72	INTERACTION FARM/KIDDING YEAR	Rump Width
168	-0.770111	73	INTERACTION FARM/KIDDING YEAR	Rump Width
169	0.0310119	74	INTERACTION FARM/KIDDING YEAR	Rump Width
170	0	75	INTERACTION FARM/KIDDING YEAR	Rump Width
171	-1.19028	76	INTERACTION FARM/KIDDING YEAR	Rump Width
172	0	77	INTERACTION FARM/KIDDING YEAR	Rump Width
173	-0.648636	78	INTERACTION FARM/KIDDING YEAR	Rump Width
174	0.217628	79	INTERACTION FARM/KIDDING YEAR	Rump Width
175	0	80	INTERACTION FARM/KIDDING YEAR	Rump Width
176	0.160925	81	INTERACTION FARM/KIDDING YEAR	Rump Width
177	-0.605833	82	INTERACTION FARM/KIDDING YEAR	Rump Width
178	-2.54387	83	INTERACTION FARM/KIDDING YEAR	Rump Width
179	-0.368751	84	INTERACTION FARM/KIDDING YEAR	Rump Width
180	0	85	INTERACTION FARM/KIDDING YEAR	Rump Width
181	-0.102139	86	INTERACTION FARM/KIDDING YEAR	Rump Width
182	0.146223	87	INTERACTION FARM/KIDDING YEAR	Rump Width
183	0.308932	88	INTERACTION FARM/KIDDING YEAR	Rump Width
184	0	89	INTERACTION FARM/KIDDING YEAR	Rump Width
185	0.107162	90	INTERACTION FARM/KIDDING YEAR	Rump Width
186	0	91	INTERACTION FARM/KIDDING YEAR	Rump Width
187	-0.730855	92	INTERACTION FARM/KIDDING YEAR	Rump Width
188	-0.624145	93	INTERACTION FARM/KIDDING YEAR	Rump Width
189	-2.68104	94	INTERACTION FARM/KIDDING YEAR	Rump Width
190	-1.61359	95	INTERACTION FARM/KIDDING YEAR	Rump Width
191	-0.491674	97	INTERACTION FARM/KIDDING YEAR	Rump Width
192	-0.24862	98	INTERACTION FARM/KIDDING YEAR	Rump Width
193	0.494945	99	INTERACTION FARM/KIDDING YEAR	Rump Width
194	0.508948	100	INTERACTION FARM/KIDDING YEAR	Rump Width
195	0.637096	101	INTERACTION FARM/KIDDING YEAR	Rump Width
196	-0.052019	102	INTERACTION FARM/KIDDING YEAR	Rump Width
197	-0.222517	103	INTERACTION FARM/KIDDING YEAR	Rump Width
198	-0.456071	104	INTERACTION FARM/KIDDING YEAR	Rump Width
199	-0.625747	105	INTERACTION FARM/KIDDING YEAR	Rump Width
200	-0.36459	106	INTERACTION FARM/KIDDING YEAR	Rump Width
201	-2.37452	107	INTERACTION FARM/KIDDING YEAR	Rump Width
202	-0.748645	108	INTERACTION FARM/KIDDING YEAR	Rump Width
203	-0.476526	109	INTERACTION FARM/KIDDING YEAR	Rump Width
204	0	110	INTERACTION FARM/KIDDING YEAR	Rump Width
205	-1.33165	111	INTERACTION FARM/KIDDING YEAR	Rump Width
206	-0.264766	112	INTERACTION FARM/KIDDING YEAR	Rump Width
207	0.171284	113	INTERACTION FARM/KIDDING YEAR	Rump Width
208	-0.158741	114	INTERACTION FARM/KIDDING YEAR	Rump Width
209	-0.432748	115	INTERACTION FARM/KIDDING YEAR	Rump Width
210	0	116	INTERACTION FARM/KIDDING YEAR	Rump Width
211	-0.833748	117	INTERACTION FARM/KIDDING YEAR	Rump Width
212	0.111611	118	INTERACTION FARM/KIDDING YEAR	Rump Width
213	-0.345987	119	INTERACTION FARM/KIDDING YEAR	Rump Width
214	0.432766	120	INTERACTION FARM/KIDDING YEAR	Rump Width
215	-2.15942	121	INTERACTION FARM/KIDDING YEAR	Rump Width
216	0.502739	122	INTERACTION FARM/KIDDING YEAR	Rump Width
217	-0.487525	123	INTERACTION FARM/KIDDING YEAR	Rump Width
218	-1.55538	124	INTERACTION FARM/KIDDING YEAR	Rump Width
219	-2.23206	125	INTERACTION FARM/KIDDING YEAR	Rump Width
220	-0.842669	126	INTERACTION FARM/KIDDING YEAR	Rump Width
221	0.267502	127	INTERACTION FARM/KIDDING YEAR	Rump Width
222	0.220886	128	INTERACTION FARM/KIDDING YEAR	Rump Width
223	-0.251783	129	INTERACTION FARM/KIDDING YEAR	Rump Width
224	-0.761074	130	INTERACTION FARM/KIDDING YEAR	Rump Width
225	-0.205968	131	INTERACTION FARM/KIDDING YEAR	Rump Width
226	-0.074855	132	INTERACTION FARM/KIDDING YEAR	Rump Width
227	-0.0651636	133	INTERACTION FARM/KIDDING YEAR	Rump Width
228	-0.24772	134	INTERACTION FARM/KIDDING YEAR	Rump Width
229	-0.515837	135	INTERACTION FARM/KIDDING YEAR	Rump Width
230	0.144451	136	INTERACTION FARM/KIDDING YEAR	Rump Width
231	0	137	INTERACTION FARM/KIDDING YEAR	Rump Width
232	0.521145	138	INTERACTION FARM/KIDDING YEAR	Rump Width
233	-0.383134	139	INTERACTION FARM/KIDDING YEAR	Rump Width
234	-0.0863523	140	INTERACTION FARM/KIDDING YEAR	Rump Width
235	0	141	INTERACTION FARM/KIDDING YEAR	Rump Width
236	-0.250643	142	INTERACTION FARM/KIDDING YEAR	Rump Width
237	0.497546	143	INTERACTION FARM/KIDDING YEAR	Rump Width
238	0.677488	144	INTERACTION FARM/KIDDING YEAR	Rump Width
239	0.702621	145	INTERACTION FARM/KIDDING YEAR	Rump Width
240	1.02593	146	INTERACTION FARM/KIDDING YEAR	Rump Width
241	0.406724	147	INTERACTION FARM/KIDDING YEAR	Rump Width
242	-0.0368608	148	INTERACTION FARM/KIDDING YEAR	Rump Width
243	0.802099	149	INTERACTION FARM/KIDDING YEAR	Rump Width
244	0.79204	150	INTERACTION FARM/KIDDING YEAR	Rump Width
245	-0.00806465	151	INTERACTION FARM/KIDDING YEAR	Rump Width
246	-0.173565	152	INTERACTION FARM/KIDDING YEAR	Rump Width
247	0.0555073	153	INTERACTION FARM/KIDDING YEAR	Rump Width
248	-0.167514	154	INTERACTION FARM/KIDDING YEAR	Rump Width
249	0.185078	155	INTERACTION FARM/KIDDING YEAR	Rump Width
250	-0.264598	156	INTERACTION FARM/KIDDING YEAR	Rump Width
251	1.09546	157	INTERACTION FARM/KIDDING YEAR	Rump Width
252	-1.05196	158	INTERACTION FARM/KIDDING YEAR	Rump Width
253	-0.44218	160	INTERACTION FARM/KIDDING YEAR	Rump Width
254	-0.432701	161	INTERACTION FARM/KIDDING YEAR	Rump Width
255	-0.380396	162	INTERACTION FARM/KIDDING YEAR	Rump Width
256	-0.832022	163	INTERACTION FARM/KIDDING YEAR	Rump Width
257	-1.75388	164	INTERACTION FARM/KIDDING YEAR	Rump Width
258	-0.355965	165	INTERACTION FARM/KIDDING YEAR	Rump Width
259	-0.0607846	166	INTERACTION FARM/KIDDING YEAR	Rump Width
260	-0.161364	167	INTERACTION FARM/KIDDING YEAR	Rump Width
261	0.0923818	168	INTERACTION FARM/KIDDING YEAR	Rump Width
262	0	169	INTERACTION FARM/KIDDING YEAR	Rump Width
263	0.543413	170	INTERACTION FARM/KIDDING YEAR	Rump Width
264	0.71891	171	INTERACTION FARM/KIDDING YEAR	Rump Width
265	-0.067041	172	INTERACTION FARM/KIDDING YEAR	Rump Width
266	0.581357	173	INTERACTION FARM/KIDDING YEAR	Rump Width
267	0.465276	174	INTERACTION FARM/KIDDING YEAR	Rump Width
268	0	175	INTERACTION FARM/KIDDING YEAR	Rump Width
269	0.401136	176	INTERACTION FARM/KIDDING YEAR	Rump Width
270	0.0789379	177	INTERACTION FARM/KIDDING YEAR	Rump Width
271	0.139607	178	INTERACTION FARM/KIDDING YEAR	Rump Width
272	0.126471	179	INTERACTION FARM/KIDDING YEAR	Rump Width
273	0.0756397	180	INTERACTION FARM/KIDDING YEAR	Rump Width
274	0.392882	181	INTERACTION FARM/KIDDING YEAR	Rump Width
275	-0.0355037	183	INTERACTION FARM/KIDDING YEAR	Rump Width
276	-0.474638	184	INTERACTION FARM/KIDDING YEAR	Rump Width
277	-0.160284	185	INTERACTION FARM/KIDDING YEAR	Rump Width
278	-0.122839	186	INTERACTION FARM/KIDDING YEAR	Rump Width
279	-0.0271523	187	INTERACTION FARM/KIDDING YEAR	Rump Width
280	0	188	INTERACTION FARM/KIDDING YEAR	Rump Width
281	0	189	INTERACTION FARM/KIDDING YEAR	Rump Width
282	0.540191	190	INTERACTION FARM/KIDDING YEAR	Rump Width
283	1.41772	191	INTERACTION FARM/KIDDING YEAR	Rump Width
284	-1.13018	192	INTERACTION FARM/KIDDING YEAR	Rump Width
285	-0.632669	193	INTERACTION FARM/KIDDING YEAR	Rump Width
286	-1.92624	194	INTERACTION FARM/KIDDING YEAR	Rump Width
287	0.0766948	195	INTERACTION FARM/KIDDING YEAR	Rump Width
288	-0.263366	196	INTERACTION FARM/KIDDING YEAR	Rump Width
289	-0.124148	197	INTERACTION FARM/KIDDING YEAR	Rump Width
290	-0.0423078	198	INTERACTION FARM/KIDDING YEAR	Rump Width
291	-0.935791	199	INTERACTION FARM/KIDDING YEAR	Rump Width
292	-0.451591	200	INTERACTION FARM/KIDDING YEAR	Rump Width
293	-0.467148	201	INTERACTION FARM/KIDDING YEAR	Rump Width
294	1.01105	202	INTERACTION FARM/KIDDING YEAR	Rump Width
295	0.537251	203	INTERACTION FARM/KIDDING YEAR	Rump Width
296	0.647622	204	INTERACTION FARM/KIDDING YEAR	Rump Width
297	1.06187	205	INTERACTION FARM/KIDDING YEAR	Rump Width
298	0.0589165	206	INTERACTION FARM/KIDDING YEAR	Rump Width
299	0.383754	207	INTERACTION FARM/KIDDING YEAR	Rump Width
300	0	208	INTERACTION FARM/KIDDING YEAR	Rump Width
301	0.379854	209	INTERACTION FARM/KIDDING YEAR	Rump Width
302	1.31851	210	INTERACTION FARM/KIDDING YEAR	Rump Width
303	0.902063	211	INTERACTION FARM/KIDDING YEAR	Rump Width
304	0.146238	212	INTERACTION FARM/KIDDING YEAR	Rump Width
305	-0.212944	213	INTERACTION FARM/KIDDING YEAR	Rump Width
306	-0.128519	214	INTERACTION FARM/KIDDING YEAR	Rump Width
307	0.284327	215	INTERACTION FARM/KIDDING YEAR	Rump Width
308	-1.49557	216	INTERACTION FARM/KIDDING YEAR	Rump Width
309	-0.123441	217	INTERACTION FARM/KIDDING YEAR	Rump Width
310	-2.59441	218	INTERACTION FARM/KIDDING YEAR	Rump Width
311	-0.365252	219	INTERACTION FARM/KIDDING YEAR	Rump Width
312	-1.1144	220	INTERACTION FARM/KIDDING YEAR	Rump Width
313	-0.0899876	221	INTERACTION FARM/KIDDING YEAR	Rump Width
314	-0.0002395	222	INTERACTION FARM/KIDDING YEAR	Rump Width
315	0.147019	223	INTERACTION FARM/KIDDING YEAR	Rump Width
316	-0.193805	224	INTERACTION FARM/KIDDING YEAR	Rump Width
317	-0.0331004	225	INTERACTION FARM/KIDDING YEAR	Rump Width
318	0.011974	226	INTERACTION FARM/KIDDING YEAR	Rump Width
319	-0.121014	227	INTERACTION FARM/KIDDING YEAR	Rump Width
320	0.461111	228	INTERACTION FARM/KIDDING YEAR	Rump Width
321	0.00915047	229	INTERACTION FARM/KIDDING YEAR	Rump Width
322	0	230	INTERACTION FARM/KIDDING YEAR	Rump Width
323	-0.544024	231	INTERACTION FARM/KIDDING YEAR	Rump Width
324	-0.0157832	232	INTERACTION FARM/KIDDING YEAR	Rump Width
325	-0.170416	233	INTERACTION FARM/KIDDING YEAR	Rump Width
326	0.502294	234	INTERACTION FARM/KIDDING YEAR	Rump Width
327	0.0265528	235	INTERACTION FARM/KIDDING YEAR	Rump Width
328	0.269314	236	INTERACTION FARM/KIDDING YEAR	Rump Width
329	3.733e-05	237	INTERACTION FARM/KIDDING YEAR	Rump Width
330	0.623122	238	INTERACTION FARM/KIDDING YEAR	Rump Width
331	-0.431177	239	INTERACTION FARM/KIDDING YEAR	Rump Width
332	0.0655319	240	INTERACTION FARM/KIDDING YEAR	Rump Width
333	0	241	INTERACTION FARM/KIDDING YEAR	Rump Width
334	-0.513249	242	INTERACTION FARM/KIDDING YEAR	Rump Width
335	-0.462479	243	INTERACTION FARM/KIDDING YEAR	Rump Width
336	0.210663	244	INTERACTION FARM/KIDDING YEAR	Rump Width
337	0.492572	245	INTERACTION FARM/KIDDING YEAR	Rump Width
338	-0.0280809	246	INTERACTION FARM/KIDDING YEAR	Rump Width
339	0.486323	247	INTERACTION FARM/KIDDING YEAR	Rump Width
340	-0.00207905	248	INTERACTION FARM/KIDDING YEAR	Rump Width
341	-0.414344	249	INTERACTION FARM/KIDDING YEAR	Rump Width
342	0.977418	250	INTERACTION FARM/KIDDING YEAR	Rump Width
343	0	251	INTERACTION FARM/KIDDING YEAR	Rump Width
344	0.0619307	252	INTERACTION FARM/KIDDING YEAR	Rump Width
345	0.111551	253	INTERACTION FARM/KIDDING YEAR	Rump Width
346	0	254	INTERACTION FARM/KIDDING YEAR	Rump Width
347	0.956259	255	INTERACTION FARM/KIDDING YEAR	Rump Width
348	0.467062	256	INTERACTION FARM/KIDDING YEAR	Rump Width
349	0.420162	257	INTERACTION FARM/KIDDING YEAR	Rump Width
350	-0.00042854	258	INTERACTION FARM/KIDDING YEAR	Rump Width
351	-1.12265	259	INTERACTION FARM/KIDDING YEAR	Rump Width
352	-1.81317	260	INTERACTION FARM/KIDDING YEAR	Rump Width
353	-0.209029	261	INTERACTION FARM/KIDDING YEAR	Rump Width
354	-0.408662	262	INTERACTION FARM/KIDDING YEAR	Rump Width
355	-1.14026	263	INTERACTION FARM/KIDDING YEAR	Rump Width
356	0.237607	264	INTERACTION FARM/KIDDING YEAR	Rump Width
357	-0.312033	265	INTERACTION FARM/KIDDING YEAR	Rump Width
358	-0.00265463	266	INTERACTION FARM/KIDDING YEAR	Rump Width
359	0.140042	267	INTERACTION FARM/KIDDING YEAR	Rump Width
360	-0.205809	268	INTERACTION FARM/KIDDING YEAR	Rump Width
361	-0.0317933	269	INTERACTION FARM/KIDDING YEAR	Rump Width
362	0.0568232	270	INTERACTION FARM/KIDDING YEAR	Rump Width
363	0.514089	271	INTERACTION FARM/KIDDING YEAR	Rump Width
364	-0.3508	272	INTERACTION FARM/KIDDING YEAR	Rump Width
365	-0.358429	273	INTERACTION FARM/KIDDING YEAR	Rump Width
366	-0.131181	274	INTERACTION FARM/KIDDING YEAR	Rump Width
367	-0.458148	275	INTERACTION FARM/KIDDING YEAR	Rump Width
368	0.00931916	276	INTERACTION FARM/KIDDING YEAR	Rump Width
369	0.025223	277	INTERACTION FARM/KIDDING YEAR	Rump Width
370	-0.0775336	278	INTERACTION FARM/KIDDING YEAR	Rump Width
371	-0.155879	279	INTERACTION FARM/KIDDING YEAR	Rump Width
372	-0.98921	280	INTERACTION FARM/KIDDING YEAR	Rump Width
373	-1.58649	281	INTERACTION FARM/KIDDING YEAR	Rump Width
374	0	282	INTERACTION FARM/KIDDING YEAR	Rump Width
375	1.46409	283	INTERACTION FARM/KIDDING YEAR	Rump Width
376	1.0305	284	INTERACTION FARM/KIDDING YEAR	Rump Width
377	0.0185156	285	INTERACTION FARM/KIDDING YEAR	Rump Width
378	0.35666	286	INTERACTION FARM/KIDDING YEAR	Rump Width
379	0.566897	287	INTERACTION FARM/KIDDING YEAR	Rump Width
380	0	288	INTERACTION FARM/KIDDING YEAR	Rump Width
381	0.29794	289	INTERACTION FARM/KIDDING YEAR	Rump Width
382	0.112014	290	INTERACTION FARM/KIDDING YEAR	Rump Width
383	0	291	INTERACTION FARM/KIDDING YEAR	Rump Width
384	-0.0892557	292	INTERACTION FARM/KIDDING YEAR	Rump Width
385	-0.453518	293	INTERACTION FARM/KIDDING YEAR	Rump Width
386	0	294	INTERACTION FARM/KIDDING YEAR	Rump Width
387	-0.253432	295	INTERACTION FARM/KIDDING YEAR	Rump Width
388	-0.346906	296	INTERACTION FARM/KIDDING YEAR	Rump Width
389	0.668034	297	INTERACTION FARM/KIDDING YEAR	Rump Width
390	0	298	INTERACTION FARM/KIDDING YEAR	Rump Width
391	-0.150047	299	INTERACTION FARM/KIDDING YEAR	Rump Width
392	0.363828	300	INTERACTION FARM/KIDDING YEAR	Rump Width
393	-0.356485	301	INTERACTION FARM/KIDDING YEAR	Rump Width
394	0.643629	302	INTERACTION FARM/KIDDING YEAR	Rump Width
395	-0.178363	303	INTERACTION FARM/KIDDING YEAR	Rump Width
396	0.616012	304	INTERACTION FARM/KIDDING YEAR	Rump Width
397	0.204305	305	INTERACTION FARM/KIDDING YEAR	Rump Width
398	-0.314366	306	INTERACTION FARM/KIDDING YEAR	Rump Width
399	-0.195276	307	INTERACTION FARM/KIDDING YEAR	Rump Width
400	1.36033	308	INTERACTION FARM/KIDDING YEAR	Rump Width
401	0	309	INTERACTION FARM/KIDDING YEAR	Rump Width
402	0	310	INTERACTION FARM/KIDDING YEAR	Rump Width
403	0.447619	311	INTERACTION FARM/KIDDING YEAR	Rump Width
404	0.244282	312	INTERACTION FARM/KIDDING YEAR	Rump Width
405	-0.0733132	313	INTERACTION FARM/KIDDING YEAR	Rump Width
406	-0.525651	314	INTERACTION FARM/KIDDING YEAR	Rump Width
407	-0.286484	315	INTERACTION FARM/KIDDING YEAR	Rump Width
408	-0.257757	316	INTERACTION FARM/KIDDING YEAR	Rump Width
409	0	317	INTERACTION FARM/KIDDING YEAR	Rump Width
410	0.085633	318	INTERACTION FARM/KIDDING YEAR	Rump Width
411	0.487125	319	INTERACTION FARM/KIDDING YEAR	Rump Width
412	0.371208	320	INTERACTION FARM/KIDDING YEAR	Rump Width
413	-0.201842	321	INTERACTION FARM/KIDDING YEAR	Rump Width
414	0.205046	322	INTERACTION FARM/KIDDING YEAR	Rump Width
415	0.538441	323	INTERACTION FARM/KIDDING YEAR	Rump Width
416	0.447807	324	INTERACTION FARM/KIDDING YEAR	Rump Width
417	0	325	INTERACTION FARM/KIDDING YEAR	Rump Width
418	0.385954	326	INTERACTION FARM/KIDDING YEAR	Rump Width
419	-0.159242	327	INTERACTION FARM/KIDDING YEAR	Rump Width
420	-0.469385	328	INTERACTION FARM/KIDDING YEAR	Rump Width
421	-0.0378837	329	INTERACTION FARM/KIDDING YEAR	Rump Width
422	0.36558	330	INTERACTION FARM/KIDDING YEAR	Rump Width
423	0	331	INTERACTION FARM/KIDDING YEAR	Rump Width
424	-0.381716	332	INTERACTION FARM/KIDDING YEAR	Rump Width
425	-0.437702	333	INTERACTION FARM/KIDDING YEAR	Rump Width
426	0.577311	334	INTERACTION FARM/KIDDING YEAR	Rump Width
427	0.360776	335	INTERACTION FARM/KIDDING YEAR	Rump Width
428	-0.161583	336	INTERACTION FARM/KIDDING YEAR	Rump Width
429	-0.213828	337	INTERACTION FARM/KIDDING YEAR	Rump Width
430	1.15057	338	INTERACTION FARM/KIDDING YEAR	Rump Width
431	-0.459244	339	INTERACTION FARM/KIDDING YEAR	Rump Width
432	-0.330053	340	INTERACTION FARM/KIDDING YEAR	Rump Width
433	0	341	INTERACTION FARM/KIDDING YEAR	Rump Width
434	-0.0811957	342	INTERACTION FARM/KIDDING YEAR	Rump Width
435	-0.097965	343	INTERACTION FARM/KIDDING YEAR	Rump Width
436	-0.424178	344	INTERACTION FARM/KIDDING YEAR	Rump Width
437	-0.715765	345	INTERACTION FARM/KIDDING YEAR	Rump Width
438	-0.554145	346	INTERACTION FARM/KIDDING YEAR	Rump Width
439	0.654593	347	INTERACTION FARM/KIDDING YEAR	Rump Width
440	-0.188909	348	INTERACTION FARM/KIDDING YEAR	Rump Width
441	0	349	INTERACTION FARM/KIDDING YEAR	Rump Width
442	-0.139259	350	INTERACTION FARM/KIDDING YEAR	Rump Width
443	1.20658	351	INTERACTION FARM/KIDDING YEAR	Rump Width
444	-0.0578034	352	INTERACTION FARM/KIDDING YEAR	Rump Width
445	0.122477	353	INTERACTION FARM/KIDDING YEAR	Rump Width
446	-0.105382	354	INTERACTION FARM/KIDDING YEAR	Rump Width
447	0.286256	355	INTERACTION FARM/KIDDING YEAR	Rump Width
448	-0.0859151	356	INTERACTION FARM/KIDDING YEAR	Rump Width
449	0.623775	357	INTERACTION FARM/KIDDING YEAR	Rump Width
450	0.329773	358	INTERACTION FARM/KIDDING YEAR	Rump Width
451	0	359	INTERACTION FARM/KIDDING YEAR	Rump Width
452	-1.0846	360	INTERACTION FARM/KIDDING YEAR	Rump Width
453	0	361	INTERACTION FARM/KIDDING YEAR	Rump Width
454	0	362	INTERACTION FARM/KIDDING YEAR	Rump Width
455	-0.289521	363	INTERACTION FARM/KIDDING YEAR	Rump Width
456	0	364	INTERACTION FARM/KIDDING YEAR	Rump Width
457	0.216672	365	INTERACTION FARM/KIDDING YEAR	Rump Width
458	0	366	INTERACTION FARM/KIDDING YEAR	Rump Width
459	0	367	INTERACTION FARM/KIDDING YEAR	Rump Width
460	0	368	INTERACTION FARM/KIDDING YEAR	Rump Width
461	0.792238	369	INTERACTION FARM/KIDDING YEAR	Rump Width
462	-0.651972	370	INTERACTION FARM/KIDDING YEAR	Rump Width
463	0.465822	371	INTERACTION FARM/KIDDING YEAR	Rump Width
464	-0.0403272	372	INTERACTION FARM/KIDDING YEAR	Rump Width
465	0	373	INTERACTION FARM/KIDDING YEAR	Rump Width
466	0	374	INTERACTION FARM/KIDDING YEAR	Rump Width
467	0.248288	375	INTERACTION FARM/KIDDING YEAR	Rump Width
468	0.486724	376	INTERACTION FARM/KIDDING YEAR	Rump Width
469	0	377	INTERACTION FARM/KIDDING YEAR	Rump Width
470	0.312514	378	INTERACTION FARM/KIDDING YEAR	Rump Width
471	0	379	INTERACTION FARM/KIDDING YEAR	Rump Width
472	0	380	INTERACTION FARM/KIDDING YEAR	Rump Width
473	0.385014	381	INTERACTION FARM/KIDDING YEAR	Rump Width
474	-0.605817	382	INTERACTION FARM/KIDDING YEAR	Rump Width
475	0.929104	383	INTERACTION FARM/KIDDING YEAR	Rump Width
476	0.818048	384	INTERACTION FARM/KIDDING YEAR	Rump Width
477	0.346587	385	INTERACTION FARM/KIDDING YEAR	Rump Width
478	0.0864934	386	INTERACTION FARM/KIDDING YEAR	Rump Width
479	0	387	INTERACTION FARM/KIDDING YEAR	Rump Width
480	-0.0226916	388	INTERACTION FARM/KIDDING YEAR	Rump Width
481	0.227102	389	INTERACTION FARM/KIDDING YEAR	Rump Width
482	0.0245814	390	INTERACTION FARM/KIDDING YEAR	Rump Width
483	0	391	INTERACTION FARM/KIDDING YEAR	Rump Width
484	0.0744187	393	INTERACTION FARM/KIDDING YEAR	Rump Width
485	0	394	INTERACTION FARM/KIDDING YEAR	Rump Width
486	0	395	INTERACTION FARM/KIDDING YEAR	Rump Width
487	0	396	INTERACTION FARM/KIDDING YEAR	Rump Width
488	0.888765	397	INTERACTION FARM/KIDDING YEAR	Rump Width
489	0	398	INTERACTION FARM/KIDDING YEAR	Rump Width
490	0.0942025	399	INTERACTION FARM/KIDDING YEAR	Rump Width
491	0.819917	400	INTERACTION FARM/KIDDING YEAR	Rump Width
492	0.714682	401	INTERACTION FARM/KIDDING YEAR	Rump Width
493	0.285816	402	INTERACTION FARM/KIDDING YEAR	Rump Width
494	0	403	INTERACTION FARM/KIDDING YEAR	Rump Width
495	1.09504	404	INTERACTION FARM/KIDDING YEAR	Rump Width
496	0	405	INTERACTION FARM/KIDDING YEAR	Rump Width
497	0.182686	1	FARM	Rump Angle
498	-0.124257	2	FARM	Rump Angle
499	0.179076	3	FARM	Rump Angle
500	-0.527393	4	FARM	Rump Angle
501	0.0907912	5	FARM	Rump Angle
502	0	6	FARM	Rump Angle
503	0	7	FARM	Rump Angle
504	-0.0157479	8	FARM	Rump Angle
505	-0.45927	9	FARM	Rump Angle
506	0.344231	10	FARM	Rump Angle
507	-0.186981	13	FARM	Rump Angle
508	0	14	FARM	Rump Angle
509	-0.109184	15	FARM	Rump Angle
510	0	16	FARM	Rump Angle
511	-0.184455	17	FARM	Rump Angle
512	1.05981	18	FARM	Rump Angle
513	0.749706	19	FARM	Rump Angle
514	-0.43056	20	FARM	Rump Angle
515	-0.421894	21	FARM	Rump Angle
516	-0.0868498	23	FARM	Rump Angle
517	-0.195224	24	FARM	Rump Angle
518	0.0553814	25	FARM	Rump Angle
519	0	26	FARM	Rump Angle
520	-0.632337	27	FARM	Rump Angle
521	-0.329801	28	FARM	Rump Angle
522	-0.2721	29	FARM	Rump Angle
523	-0.399654	30	FARM	Rump Angle
524	0.718627	31	FARM	Rump Angle
525	0.126024	32	FARM	Rump Angle
526	-0.247473	33	FARM	Rump Angle
527	0.375517	34	FARM	Rump Angle
528	-0.405663	35	FARM	Rump Angle
529	0.113527	36	FARM	Rump Angle
530	0	38	FARM	Rump Angle
531	-0.248808	39	FARM	Rump Angle
532	-0.273353	40	FARM	Rump Angle
533	-0.251703	41	FARM	Rump Angle
534	-0.288954	42	FARM	Rump Angle
535	-0.645215	43	FARM	Rump Angle
536	-0.205299	44	FARM	Rump Angle
537	-0.341429	45	FARM	Rump Angle
538	-0.497598	48	FARM	Rump Angle
539	0	49	FARM	Rump Angle
540	0	50	FARM	Rump Angle
541	-0.274951	51	FARM	Rump Angle
542	-0.233566	52	FARM	Rump Angle
543	-0.125069	53	FARM	Rump Angle
544	0.287019	54	FARM	Rump Angle
545	0.0431931	55	FARM	Rump Angle
546	-0.349232	56	FARM	Rump Angle
547	-0.230312	57	FARM	Rump Angle
548	0.25177	58	FARM	Rump Angle
549	-0.472422	59	FARM	Rump Angle
550	0.824218	60	FARM	Rump Angle
551	-0.67585	61	FARM	Rump Angle
552	0.379819	62	FARM	Rump Angle
553	-0.0743563	63	FARM	Rump Angle
554	-0.113105	64	FARM	Rump Angle
555	-0.189005	65	FARM	Rump Angle
556	-0.233413	66	FARM	Rump Angle
557	-0.390174	68	FARM	Rump Angle
558	-0.296919	69	FARM	Rump Angle
559	0	70	FARM	Rump Angle
560	-0.0438101	71	FARM	Rump Angle
561	-0.496405	73	FARM	Rump Angle
562	0	74	FARM	Rump Angle
563	0.178783	75	FARM	Rump Angle
564	-0.555027	76	FARM	Rump Angle
565	0.997323	78	FARM	Rump Angle
566	-0.158026	79	FARM	Rump Angle
567	-1.27567	80	FARM	Rump Angle
568	0.865416	81	FARM	Rump Angle
569	0	82	FARM	Rump Angle
570	-0.557869	83	FARM	Rump Angle
571	0.224064	84	FARM	Rump Angle
572	-0.578015	85	FARM	Rump Angle
573	0.0240034	1	LACTATION STAGE	Rump Angle
574	0	2	LACTATION STAGE	Rump Angle
575	0.0164242	1	KIDDING MONTH	Rump Angle
576	0.00239158	2	KIDDING MONTH	Rump Angle
577	0.0152621	3	KIDDING MONTH	Rump Angle
578	-0.00108291	4	KIDDING MONTH	Rump Angle
579	0.00635001	5	KIDDING MONTH	Rump Angle
580	0.0279573	6	KIDDING MONTH	Rump Angle
581	0.0612212	7	KIDDING MONTH	Rump Angle
582	0.0562471	8	KIDDING MONTH	Rump Angle
583	0.0612621	9	KIDDING MONTH	Rump Angle
584	-0.0296245	10	KIDDING MONTH	Rump Angle
585	0.00128275	11	KIDDING MONTH	Rump Angle
586	0	12	KIDDING MONTH	Rump Angle
587	0	1	INTERACTION FARM/KIDDING YEAR	Rump Angle
588	0	2	INTERACTION FARM/KIDDING YEAR	Rump Angle
589	-0.174374	3	INTERACTION FARM/KIDDING YEAR	Rump Angle
590	0.126476	4	INTERACTION FARM/KIDDING YEAR	Rump Angle
591	0.18112	5	INTERACTION FARM/KIDDING YEAR	Rump Angle
592	-1.36106	7	INTERACTION FARM/KIDDING YEAR	Rump Angle
593	-0.371522	8	INTERACTION FARM/KIDDING YEAR	Rump Angle
594	-3.20894	9	INTERACTION FARM/KIDDING YEAR	Rump Angle
595	-0.552405	10	INTERACTION FARM/KIDDING YEAR	Rump Angle
596	0	11	INTERACTION FARM/KIDDING YEAR	Rump Angle
597	-0.707138	12	INTERACTION FARM/KIDDING YEAR	Rump Angle
598	0.23881	13	INTERACTION FARM/KIDDING YEAR	Rump Angle
599	-0.765162	14	INTERACTION FARM/KIDDING YEAR	Rump Angle
600	-0.681702	15	INTERACTION FARM/KIDDING YEAR	Rump Angle
601	0	16	INTERACTION FARM/KIDDING YEAR	Rump Angle
602	-2.15183	17	INTERACTION FARM/KIDDING YEAR	Rump Angle
603	0	18	INTERACTION FARM/KIDDING YEAR	Rump Angle
604	0.701275	19	INTERACTION FARM/KIDDING YEAR	Rump Angle
605	0	20	INTERACTION FARM/KIDDING YEAR	Rump Angle
606	0.739001	21	INTERACTION FARM/KIDDING YEAR	Rump Angle
607	0.42722	22	INTERACTION FARM/KIDDING YEAR	Rump Angle
608	0	23	INTERACTION FARM/KIDDING YEAR	Rump Angle
609	1.25713	24	INTERACTION FARM/KIDDING YEAR	Rump Angle
610	0.872986	25	INTERACTION FARM/KIDDING YEAR	Rump Angle
611	1.22649	26	INTERACTION FARM/KIDDING YEAR	Rump Angle
612	0.388673	27	INTERACTION FARM/KIDDING YEAR	Rump Angle
613	0.454082	28	INTERACTION FARM/KIDDING YEAR	Rump Angle
614	0.787552	29	INTERACTION FARM/KIDDING YEAR	Rump Angle
615	0.728899	30	INTERACTION FARM/KIDDING YEAR	Rump Angle
616	0.88062	31	INTERACTION FARM/KIDDING YEAR	Rump Angle
617	1.31921	32	INTERACTION FARM/KIDDING YEAR	Rump Angle
618	0.584324	33	INTERACTION FARM/KIDDING YEAR	Rump Angle
619	-0.0562805	34	INTERACTION FARM/KIDDING YEAR	Rump Angle
620	0	35	INTERACTION FARM/KIDDING YEAR	Rump Angle
621	-0.142851	36	INTERACTION FARM/KIDDING YEAR	Rump Angle
622	-0.974319	37	INTERACTION FARM/KIDDING YEAR	Rump Angle
623	-0.129938	38	INTERACTION FARM/KIDDING YEAR	Rump Angle
624	-1.21047	39	INTERACTION FARM/KIDDING YEAR	Rump Angle
625	-0.464347	40	INTERACTION FARM/KIDDING YEAR	Rump Angle
626	-0.223863	41	INTERACTION FARM/KIDDING YEAR	Rump Angle
627	-0.909965	42	INTERACTION FARM/KIDDING YEAR	Rump Angle
628	-0.71429	43	INTERACTION FARM/KIDDING YEAR	Rump Angle
629	-2.93323	44	INTERACTION FARM/KIDDING YEAR	Rump Angle
630	-0.487981	45	INTERACTION FARM/KIDDING YEAR	Rump Angle
631	-2.26052	46	INTERACTION FARM/KIDDING YEAR	Rump Angle
632	0.0648254	47	INTERACTION FARM/KIDDING YEAR	Rump Angle
633	0.436372	48	INTERACTION FARM/KIDDING YEAR	Rump Angle
634	0.240154	49	INTERACTION FARM/KIDDING YEAR	Rump Angle
635	0.270849	50	INTERACTION FARM/KIDDING YEAR	Rump Angle
636	0.397396	51	INTERACTION FARM/KIDDING YEAR	Rump Angle
637	0.872731	52	INTERACTION FARM/KIDDING YEAR	Rump Angle
638	0	53	INTERACTION FARM/KIDDING YEAR	Rump Angle
639	0.200059	54	INTERACTION FARM/KIDDING YEAR	Rump Angle
640	0.283066	55	INTERACTION FARM/KIDDING YEAR	Rump Angle
641	0.786862	56	INTERACTION FARM/KIDDING YEAR	Rump Angle
642	0.689954	57	INTERACTION FARM/KIDDING YEAR	Rump Angle
643	1.16811	58	INTERACTION FARM/KIDDING YEAR	Rump Angle
644	0.60912	59	INTERACTION FARM/KIDDING YEAR	Rump Angle
645	0.0879938	60	INTERACTION FARM/KIDDING YEAR	Rump Angle
646	0.180599	61	INTERACTION FARM/KIDDING YEAR	Rump Angle
647	-0.0286363	62	INTERACTION FARM/KIDDING YEAR	Rump Angle
648	0.782777	63	INTERACTION FARM/KIDDING YEAR	Rump Angle
649	0.448278	64	INTERACTION FARM/KIDDING YEAR	Rump Angle
650	0.603819	65	INTERACTION FARM/KIDDING YEAR	Rump Angle
651	0.464599	66	INTERACTION FARM/KIDDING YEAR	Rump Angle
652	-0.628802	67	INTERACTION FARM/KIDDING YEAR	Rump Angle
653	0.719844	68	INTERACTION FARM/KIDDING YEAR	Rump Angle
654	0.546497	69	INTERACTION FARM/KIDDING YEAR	Rump Angle
655	1.69814	70	INTERACTION FARM/KIDDING YEAR	Rump Angle
656	0	71	INTERACTION FARM/KIDDING YEAR	Rump Angle
657	0.510269	72	INTERACTION FARM/KIDDING YEAR	Rump Angle
658	0.0184326	73	INTERACTION FARM/KIDDING YEAR	Rump Angle
659	0.132874	74	INTERACTION FARM/KIDDING YEAR	Rump Angle
660	0	75	INTERACTION FARM/KIDDING YEAR	Rump Angle
661	-1.19996	76	INTERACTION FARM/KIDDING YEAR	Rump Angle
662	0	77	INTERACTION FARM/KIDDING YEAR	Rump Angle
663	0.553716	78	INTERACTION FARM/KIDDING YEAR	Rump Angle
664	-0.120573	79	INTERACTION FARM/KIDDING YEAR	Rump Angle
665	0	80	INTERACTION FARM/KIDDING YEAR	Rump Angle
666	-0.502146	81	INTERACTION FARM/KIDDING YEAR	Rump Angle
667	0.680517	82	INTERACTION FARM/KIDDING YEAR	Rump Angle
668	-1.07616	83	INTERACTION FARM/KIDDING YEAR	Rump Angle
669	-0.112681	84	INTERACTION FARM/KIDDING YEAR	Rump Angle
670	0	85	INTERACTION FARM/KIDDING YEAR	Rump Angle
671	1.25437	86	INTERACTION FARM/KIDDING YEAR	Rump Angle
672	0.16095	87	INTERACTION FARM/KIDDING YEAR	Rump Angle
673	0.545849	88	INTERACTION FARM/KIDDING YEAR	Rump Angle
674	0	89	INTERACTION FARM/KIDDING YEAR	Rump Angle
675	-0.11569	90	INTERACTION FARM/KIDDING YEAR	Rump Angle
676	0	91	INTERACTION FARM/KIDDING YEAR	Rump Angle
677	0.645374	92	INTERACTION FARM/KIDDING YEAR	Rump Angle
678	0.913524	93	INTERACTION FARM/KIDDING YEAR	Rump Angle
679	-0.982446	94	INTERACTION FARM/KIDDING YEAR	Rump Angle
680	0.372622	95	INTERACTION FARM/KIDDING YEAR	Rump Angle
681	0.580459	97	INTERACTION FARM/KIDDING YEAR	Rump Angle
682	0.503244	98	INTERACTION FARM/KIDDING YEAR	Rump Angle
683	0.322367	99	INTERACTION FARM/KIDDING YEAR	Rump Angle
684	0.0461621	100	INTERACTION FARM/KIDDING YEAR	Rump Angle
685	-0.178776	101	INTERACTION FARM/KIDDING YEAR	Rump Angle
686	0.0566826	102	INTERACTION FARM/KIDDING YEAR	Rump Angle
687	-0.207095	103	INTERACTION FARM/KIDDING YEAR	Rump Angle
688	-0.0583319	104	INTERACTION FARM/KIDDING YEAR	Rump Angle
689	0.122881	105	INTERACTION FARM/KIDDING YEAR	Rump Angle
690	0.213596	106	INTERACTION FARM/KIDDING YEAR	Rump Angle
691	-1.25474	107	INTERACTION FARM/KIDDING YEAR	Rump Angle
692	0.133444	108	INTERACTION FARM/KIDDING YEAR	Rump Angle
693	-0.209363	109	INTERACTION FARM/KIDDING YEAR	Rump Angle
694	0	110	INTERACTION FARM/KIDDING YEAR	Rump Angle
695	-2.00387	111	INTERACTION FARM/KIDDING YEAR	Rump Angle
696	0.709228	112	INTERACTION FARM/KIDDING YEAR	Rump Angle
697	0.341914	113	INTERACTION FARM/KIDDING YEAR	Rump Angle
698	0.254283	114	INTERACTION FARM/KIDDING YEAR	Rump Angle
699	0.0901636	115	INTERACTION FARM/KIDDING YEAR	Rump Angle
700	0	116	INTERACTION FARM/KIDDING YEAR	Rump Angle
701	-0.139935	117	INTERACTION FARM/KIDDING YEAR	Rump Angle
702	0.507878	118	INTERACTION FARM/KIDDING YEAR	Rump Angle
703	0.0931753	119	INTERACTION FARM/KIDDING YEAR	Rump Angle
704	0.616525	120	INTERACTION FARM/KIDDING YEAR	Rump Angle
705	-0.630006	121	INTERACTION FARM/KIDDING YEAR	Rump Angle
706	0.766147	122	INTERACTION FARM/KIDDING YEAR	Rump Angle
707	0.471273	123	INTERACTION FARM/KIDDING YEAR	Rump Angle
708	0.224319	124	INTERACTION FARM/KIDDING YEAR	Rump Angle
709	-0.281342	125	INTERACTION FARM/KIDDING YEAR	Rump Angle
710	0.367757	126	INTERACTION FARM/KIDDING YEAR	Rump Angle
711	-0.408858	127	INTERACTION FARM/KIDDING YEAR	Rump Angle
712	-0.0367779	128	INTERACTION FARM/KIDDING YEAR	Rump Angle
713	0.692166	129	INTERACTION FARM/KIDDING YEAR	Rump Angle
714	-0.0157572	130	INTERACTION FARM/KIDDING YEAR	Rump Angle
715	0.073401	131	INTERACTION FARM/KIDDING YEAR	Rump Angle
716	0.786769	132	INTERACTION FARM/KIDDING YEAR	Rump Angle
717	0.501339	133	INTERACTION FARM/KIDDING YEAR	Rump Angle
718	-0.694861	134	INTERACTION FARM/KIDDING YEAR	Rump Angle
719	0.0257188	135	INTERACTION FARM/KIDDING YEAR	Rump Angle
720	-0.187465	136	INTERACTION FARM/KIDDING YEAR	Rump Angle
721	0	137	INTERACTION FARM/KIDDING YEAR	Rump Angle
722	-0.146398	138	INTERACTION FARM/KIDDING YEAR	Rump Angle
723	0.299836	139	INTERACTION FARM/KIDDING YEAR	Rump Angle
724	0.546356	140	INTERACTION FARM/KIDDING YEAR	Rump Angle
725	0	141	INTERACTION FARM/KIDDING YEAR	Rump Angle
726	-0.143235	142	INTERACTION FARM/KIDDING YEAR	Rump Angle
727	-0.294884	143	INTERACTION FARM/KIDDING YEAR	Rump Angle
728	0.290903	144	INTERACTION FARM/KIDDING YEAR	Rump Angle
729	-0.115233	145	INTERACTION FARM/KIDDING YEAR	Rump Angle
730	0.156325	146	INTERACTION FARM/KIDDING YEAR	Rump Angle
731	0.218098	147	INTERACTION FARM/KIDDING YEAR	Rump Angle
732	0.486548	148	INTERACTION FARM/KIDDING YEAR	Rump Angle
733	-0.389796	149	INTERACTION FARM/KIDDING YEAR	Rump Angle
734	-0.102555	150	INTERACTION FARM/KIDDING YEAR	Rump Angle
735	0.0649697	151	INTERACTION FARM/KIDDING YEAR	Rump Angle
736	-0.0373161	152	INTERACTION FARM/KIDDING YEAR	Rump Angle
737	0.555293	153	INTERACTION FARM/KIDDING YEAR	Rump Angle
738	0.951176	154	INTERACTION FARM/KIDDING YEAR	Rump Angle
739	0.0608139	155	INTERACTION FARM/KIDDING YEAR	Rump Angle
740	0.109144	156	INTERACTION FARM/KIDDING YEAR	Rump Angle
741	0.74587	157	INTERACTION FARM/KIDDING YEAR	Rump Angle
742	-0.184967	158	INTERACTION FARM/KIDDING YEAR	Rump Angle
743	-0.102343	160	INTERACTION FARM/KIDDING YEAR	Rump Angle
744	-0.622969	161	INTERACTION FARM/KIDDING YEAR	Rump Angle
745	1.06514	162	INTERACTION FARM/KIDDING YEAR	Rump Angle
746	1.25315	163	INTERACTION FARM/KIDDING YEAR	Rump Angle
747	0.240366	164	INTERACTION FARM/KIDDING YEAR	Rump Angle
748	0.232301	165	INTERACTION FARM/KIDDING YEAR	Rump Angle
749	0.117294	166	INTERACTION FARM/KIDDING YEAR	Rump Angle
750	0.783571	167	INTERACTION FARM/KIDDING YEAR	Rump Angle
751	-0.0639855	168	INTERACTION FARM/KIDDING YEAR	Rump Angle
752	0	169	INTERACTION FARM/KIDDING YEAR	Rump Angle
753	0.136976	170	INTERACTION FARM/KIDDING YEAR	Rump Angle
754	0	171	INTERACTION FARM/KIDDING YEAR	Rump Angle
755	0.758119	172	INTERACTION FARM/KIDDING YEAR	Rump Angle
756	-0.389818	173	INTERACTION FARM/KIDDING YEAR	Rump Angle
757	-0.0243532	174	INTERACTION FARM/KIDDING YEAR	Rump Angle
758	0	175	INTERACTION FARM/KIDDING YEAR	Rump Angle
759	0.320714	176	INTERACTION FARM/KIDDING YEAR	Rump Angle
760	-0.180681	177	INTERACTION FARM/KIDDING YEAR	Rump Angle
761	0.802411	178	INTERACTION FARM/KIDDING YEAR	Rump Angle
762	0.29468	179	INTERACTION FARM/KIDDING YEAR	Rump Angle
763	0	180	INTERACTION FARM/KIDDING YEAR	Rump Angle
764	-0.223314	181	INTERACTION FARM/KIDDING YEAR	Rump Angle
765	-0.0243102	183	INTERACTION FARM/KIDDING YEAR	Rump Angle
766	-0.353676	184	INTERACTION FARM/KIDDING YEAR	Rump Angle
767	0.77276	185	INTERACTION FARM/KIDDING YEAR	Rump Angle
768	0.224908	186	INTERACTION FARM/KIDDING YEAR	Rump Angle
769	0.224672	187	INTERACTION FARM/KIDDING YEAR	Rump Angle
770	0	188	INTERACTION FARM/KIDDING YEAR	Rump Angle
771	0	189	INTERACTION FARM/KIDDING YEAR	Rump Angle
772	-0.354143	190	INTERACTION FARM/KIDDING YEAR	Rump Angle
773	0.722859	191	INTERACTION FARM/KIDDING YEAR	Rump Angle
774	-0.230509	192	INTERACTION FARM/KIDDING YEAR	Rump Angle
775	-0.110589	193	INTERACTION FARM/KIDDING YEAR	Rump Angle
776	-0.140979	194	INTERACTION FARM/KIDDING YEAR	Rump Angle
777	0.210514	195	INTERACTION FARM/KIDDING YEAR	Rump Angle
778	0.171798	196	INTERACTION FARM/KIDDING YEAR	Rump Angle
779	0.605316	197	INTERACTION FARM/KIDDING YEAR	Rump Angle
780	0.293599	198	INTERACTION FARM/KIDDING YEAR	Rump Angle
781	-0.41294	199	INTERACTION FARM/KIDDING YEAR	Rump Angle
782	0.472151	200	INTERACTION FARM/KIDDING YEAR	Rump Angle
783	0.62031	201	INTERACTION FARM/KIDDING YEAR	Rump Angle
784	0.51273	202	INTERACTION FARM/KIDDING YEAR	Rump Angle
785	-0.0410568	203	INTERACTION FARM/KIDDING YEAR	Rump Angle
786	-0.469722	204	INTERACTION FARM/KIDDING YEAR	Rump Angle
787	0.621513	205	INTERACTION FARM/KIDDING YEAR	Rump Angle
788	0.203212	206	INTERACTION FARM/KIDDING YEAR	Rump Angle
789	-0.74272	207	INTERACTION FARM/KIDDING YEAR	Rump Angle
790	0	208	INTERACTION FARM/KIDDING YEAR	Rump Angle
791	-0.257989	209	INTERACTION FARM/KIDDING YEAR	Rump Angle
792	-0.143954	210	INTERACTION FARM/KIDDING YEAR	Rump Angle
793	-0.570036	211	INTERACTION FARM/KIDDING YEAR	Rump Angle
794	-0.0358911	212	INTERACTION FARM/KIDDING YEAR	Rump Angle
795	-0.136983	213	INTERACTION FARM/KIDDING YEAR	Rump Angle
796	0.408588	214	INTERACTION FARM/KIDDING YEAR	Rump Angle
797	1.11753	215	INTERACTION FARM/KIDDING YEAR	Rump Angle
798	-1.14028	216	INTERACTION FARM/KIDDING YEAR	Rump Angle
799	0.339101	217	INTERACTION FARM/KIDDING YEAR	Rump Angle
800	-0.84293	218	INTERACTION FARM/KIDDING YEAR	Rump Angle
801	-0.387704	219	INTERACTION FARM/KIDDING YEAR	Rump Angle
802	-0.82183	220	INTERACTION FARM/KIDDING YEAR	Rump Angle
803	-0.353667	221	INTERACTION FARM/KIDDING YEAR	Rump Angle
804	0.578593	222	INTERACTION FARM/KIDDING YEAR	Rump Angle
805	0.0298916	223	INTERACTION FARM/KIDDING YEAR	Rump Angle
806	0.454401	224	INTERACTION FARM/KIDDING YEAR	Rump Angle
807	0.407362	225	INTERACTION FARM/KIDDING YEAR	Rump Angle
808	-0.163571	226	INTERACTION FARM/KIDDING YEAR	Rump Angle
809	0.181343	227	INTERACTION FARM/KIDDING YEAR	Rump Angle
810	0.0968042	228	INTERACTION FARM/KIDDING YEAR	Rump Angle
811	0.785017	229	INTERACTION FARM/KIDDING YEAR	Rump Angle
812	0	230	INTERACTION FARM/KIDDING YEAR	Rump Angle
813	0.447206	231	INTERACTION FARM/KIDDING YEAR	Rump Angle
814	0.278856	232	INTERACTION FARM/KIDDING YEAR	Rump Angle
815	-0.280164	233	INTERACTION FARM/KIDDING YEAR	Rump Angle
816	-0.148115	234	INTERACTION FARM/KIDDING YEAR	Rump Angle
817	0.152589	235	INTERACTION FARM/KIDDING YEAR	Rump Angle
818	0.368767	236	INTERACTION FARM/KIDDING YEAR	Rump Angle
819	-0.192432	237	INTERACTION FARM/KIDDING YEAR	Rump Angle
820	-0.327759	238	INTERACTION FARM/KIDDING YEAR	Rump Angle
821	0.319299	239	INTERACTION FARM/KIDDING YEAR	Rump Angle
822	0.515603	240	INTERACTION FARM/KIDDING YEAR	Rump Angle
823	0	241	INTERACTION FARM/KIDDING YEAR	Rump Angle
824	0.555162	242	INTERACTION FARM/KIDDING YEAR	Rump Angle
825	0.393623	243	INTERACTION FARM/KIDDING YEAR	Rump Angle
826	0.521019	244	INTERACTION FARM/KIDDING YEAR	Rump Angle
827	-0.564173	245	INTERACTION FARM/KIDDING YEAR	Rump Angle
828	0.168664	246	INTERACTION FARM/KIDDING YEAR	Rump Angle
829	0.0130486	247	INTERACTION FARM/KIDDING YEAR	Rump Angle
830	-0.20896	248	INTERACTION FARM/KIDDING YEAR	Rump Angle
831	0.397605	249	INTERACTION FARM/KIDDING YEAR	Rump Angle
832	0.491968	250	INTERACTION FARM/KIDDING YEAR	Rump Angle
833	0	251	INTERACTION FARM/KIDDING YEAR	Rump Angle
834	0.021654	252	INTERACTION FARM/KIDDING YEAR	Rump Angle
835	0.467932	253	INTERACTION FARM/KIDDING YEAR	Rump Angle
836	0	254	INTERACTION FARM/KIDDING YEAR	Rump Angle
837	-0.777091	255	INTERACTION FARM/KIDDING YEAR	Rump Angle
838	-0.582961	256	INTERACTION FARM/KIDDING YEAR	Rump Angle
839	0.167856	257	INTERACTION FARM/KIDDING YEAR	Rump Angle
840	0.16503	258	INTERACTION FARM/KIDDING YEAR	Rump Angle
841	-1.61019	259	INTERACTION FARM/KIDDING YEAR	Rump Angle
842	-0.804055	260	INTERACTION FARM/KIDDING YEAR	Rump Angle
843	-0.121564	261	INTERACTION FARM/KIDDING YEAR	Rump Angle
844	-0.332168	262	INTERACTION FARM/KIDDING YEAR	Rump Angle
845	-0.623076	263	INTERACTION FARM/KIDDING YEAR	Rump Angle
846	-0.423986	264	INTERACTION FARM/KIDDING YEAR	Rump Angle
847	-1.29127	265	INTERACTION FARM/KIDDING YEAR	Rump Angle
848	-0.289962	266	INTERACTION FARM/KIDDING YEAR	Rump Angle
849	0.151144	267	INTERACTION FARM/KIDDING YEAR	Rump Angle
850	0.0714609	268	INTERACTION FARM/KIDDING YEAR	Rump Angle
851	-0.249831	269	INTERACTION FARM/KIDDING YEAR	Rump Angle
852	0.343169	270	INTERACTION FARM/KIDDING YEAR	Rump Angle
853	-0.0991511	271	INTERACTION FARM/KIDDING YEAR	Rump Angle
854	0.224205	272	INTERACTION FARM/KIDDING YEAR	Rump Angle
855	0.322342	273	INTERACTION FARM/KIDDING YEAR	Rump Angle
856	0.482569	274	INTERACTION FARM/KIDDING YEAR	Rump Angle
857	0.143013	275	INTERACTION FARM/KIDDING YEAR	Rump Angle
858	0.235018	276	INTERACTION FARM/KIDDING YEAR	Rump Angle
859	-0.00581934	277	INTERACTION FARM/KIDDING YEAR	Rump Angle
860	0.203507	278	INTERACTION FARM/KIDDING YEAR	Rump Angle
861	0.161639	279	INTERACTION FARM/KIDDING YEAR	Rump Angle
862	0.201648	280	INTERACTION FARM/KIDDING YEAR	Rump Angle
863	-1.67987	281	INTERACTION FARM/KIDDING YEAR	Rump Angle
864	0	282	INTERACTION FARM/KIDDING YEAR	Rump Angle
865	0.616569	283	INTERACTION FARM/KIDDING YEAR	Rump Angle
866	-0.0127023	284	INTERACTION FARM/KIDDING YEAR	Rump Angle
867	0.295675	285	INTERACTION FARM/KIDDING YEAR	Rump Angle
868	-0.0962386	286	INTERACTION FARM/KIDDING YEAR	Rump Angle
869	0.146972	287	INTERACTION FARM/KIDDING YEAR	Rump Angle
870	0	288	INTERACTION FARM/KIDDING YEAR	Rump Angle
871	-0.258571	289	INTERACTION FARM/KIDDING YEAR	Rump Angle
872	0.447128	290	INTERACTION FARM/KIDDING YEAR	Rump Angle
873	0	291	INTERACTION FARM/KIDDING YEAR	Rump Angle
874	0.361715	292	INTERACTION FARM/KIDDING YEAR	Rump Angle
875	0.364232	293	INTERACTION FARM/KIDDING YEAR	Rump Angle
876	0	294	INTERACTION FARM/KIDDING YEAR	Rump Angle
877	0.469932	295	INTERACTION FARM/KIDDING YEAR	Rump Angle
878	0.0209089	296	INTERACTION FARM/KIDDING YEAR	Rump Angle
879	-1.18393	297	INTERACTION FARM/KIDDING YEAR	Rump Angle
880	0	298	INTERACTION FARM/KIDDING YEAR	Rump Angle
881	-0.22064	299	INTERACTION FARM/KIDDING YEAR	Rump Angle
882	0.189884	300	INTERACTION FARM/KIDDING YEAR	Rump Angle
883	0.642306	301	INTERACTION FARM/KIDDING YEAR	Rump Angle
884	-0.437722	302	INTERACTION FARM/KIDDING YEAR	Rump Angle
885	0.418857	303	INTERACTION FARM/KIDDING YEAR	Rump Angle
886	-0.111163	304	INTERACTION FARM/KIDDING YEAR	Rump Angle
887	-0.250284	305	INTERACTION FARM/KIDDING YEAR	Rump Angle
888	0.0742786	306	INTERACTION FARM/KIDDING YEAR	Rump Angle
889	0.258638	307	INTERACTION FARM/KIDDING YEAR	Rump Angle
890	0.0343522	308	INTERACTION FARM/KIDDING YEAR	Rump Angle
891	0	309	INTERACTION FARM/KIDDING YEAR	Rump Angle
892	0	310	INTERACTION FARM/KIDDING YEAR	Rump Angle
893	-0.127574	311	INTERACTION FARM/KIDDING YEAR	Rump Angle
894	-0.0727139	312	INTERACTION FARM/KIDDING YEAR	Rump Angle
895	-0.552262	313	INTERACTION FARM/KIDDING YEAR	Rump Angle
896	0.152564	314	INTERACTION FARM/KIDDING YEAR	Rump Angle
897	0.153175	315	INTERACTION FARM/KIDDING YEAR	Rump Angle
898	0.0678408	316	INTERACTION FARM/KIDDING YEAR	Rump Angle
899	0	317	INTERACTION FARM/KIDDING YEAR	Rump Angle
900	0.357127	318	INTERACTION FARM/KIDDING YEAR	Rump Angle
901	-0.0439259	319	INTERACTION FARM/KIDDING YEAR	Rump Angle
902	0.0328742	320	INTERACTION FARM/KIDDING YEAR	Rump Angle
903	-0.155161	321	INTERACTION FARM/KIDDING YEAR	Rump Angle
904	-0.4149	322	INTERACTION FARM/KIDDING YEAR	Rump Angle
905	-0.577812	323	INTERACTION FARM/KIDDING YEAR	Rump Angle
906	-0.330463	324	INTERACTION FARM/KIDDING YEAR	Rump Angle
907	0	325	INTERACTION FARM/KIDDING YEAR	Rump Angle
908	-0.461178	326	INTERACTION FARM/KIDDING YEAR	Rump Angle
909	0.199735	327	INTERACTION FARM/KIDDING YEAR	Rump Angle
910	-0.727793	328	INTERACTION FARM/KIDDING YEAR	Rump Angle
911	-0.308392	329	INTERACTION FARM/KIDDING YEAR	Rump Angle
912	-0.254181	330	INTERACTION FARM/KIDDING YEAR	Rump Angle
913	0	331	INTERACTION FARM/KIDDING YEAR	Rump Angle
914	-0.159665	332	INTERACTION FARM/KIDDING YEAR	Rump Angle
915	-0.264865	333	INTERACTION FARM/KIDDING YEAR	Rump Angle
916	-0.402737	334	INTERACTION FARM/KIDDING YEAR	Rump Angle
917	-0.317188	335	INTERACTION FARM/KIDDING YEAR	Rump Angle
918	-0.451591	336	INTERACTION FARM/KIDDING YEAR	Rump Angle
919	0.23006	337	INTERACTION FARM/KIDDING YEAR	Rump Angle
920	0.148715	338	INTERACTION FARM/KIDDING YEAR	Rump Angle
921	-0.445845	339	INTERACTION FARM/KIDDING YEAR	Rump Angle
922	-0.320774	340	INTERACTION FARM/KIDDING YEAR	Rump Angle
923	0	341	INTERACTION FARM/KIDDING YEAR	Rump Angle
924	-0.341545	342	INTERACTION FARM/KIDDING YEAR	Rump Angle
925	-0.392721	343	INTERACTION FARM/KIDDING YEAR	Rump Angle
926	-0.115998	344	INTERACTION FARM/KIDDING YEAR	Rump Angle
927	-0.48065	345	INTERACTION FARM/KIDDING YEAR	Rump Angle
928	-0.251729	346	INTERACTION FARM/KIDDING YEAR	Rump Angle
929	-0.137233	347	INTERACTION FARM/KIDDING YEAR	Rump Angle
930	-0.0748164	348	INTERACTION FARM/KIDDING YEAR	Rump Angle
931	0	349	INTERACTION FARM/KIDDING YEAR	Rump Angle
932	-0.223054	350	INTERACTION FARM/KIDDING YEAR	Rump Angle
933	0.248291	351	INTERACTION FARM/KIDDING YEAR	Rump Angle
934	-0.0356825	352	INTERACTION FARM/KIDDING YEAR	Rump Angle
935	-0.73333	353	INTERACTION FARM/KIDDING YEAR	Rump Angle
936	-0.339923	354	INTERACTION FARM/KIDDING YEAR	Rump Angle
937	-0.811779	355	INTERACTION FARM/KIDDING YEAR	Rump Angle
938	-0.0903573	356	INTERACTION FARM/KIDDING YEAR	Rump Angle
939	-0.967682	357	INTERACTION FARM/KIDDING YEAR	Rump Angle
940	0.151795	358	INTERACTION FARM/KIDDING YEAR	Rump Angle
941	0	359	INTERACTION FARM/KIDDING YEAR	Rump Angle
942	-0.264117	360	INTERACTION FARM/KIDDING YEAR	Rump Angle
943	0	361	INTERACTION FARM/KIDDING YEAR	Rump Angle
944	0	362	INTERACTION FARM/KIDDING YEAR	Rump Angle
945	0.148972	363	INTERACTION FARM/KIDDING YEAR	Rump Angle
946	0	364	INTERACTION FARM/KIDDING YEAR	Rump Angle
947	-0.132013	365	INTERACTION FARM/KIDDING YEAR	Rump Angle
948	0	366	INTERACTION FARM/KIDDING YEAR	Rump Angle
949	0	367	INTERACTION FARM/KIDDING YEAR	Rump Angle
950	0	368	INTERACTION FARM/KIDDING YEAR	Rump Angle
951	-0.529393	369	INTERACTION FARM/KIDDING YEAR	Rump Angle
952	-0.528166	370	INTERACTION FARM/KIDDING YEAR	Rump Angle
953	-0.284552	371	INTERACTION FARM/KIDDING YEAR	Rump Angle
954	0.324489	372	INTERACTION FARM/KIDDING YEAR	Rump Angle
955	0	373	INTERACTION FARM/KIDDING YEAR	Rump Angle
956	0	374	INTERACTION FARM/KIDDING YEAR	Rump Angle
957	-0.472497	375	INTERACTION FARM/KIDDING YEAR	Rump Angle
958	0	376	INTERACTION FARM/KIDDING YEAR	Rump Angle
959	0	377	INTERACTION FARM/KIDDING YEAR	Rump Angle
960	0.0123818	378	INTERACTION FARM/KIDDING YEAR	Rump Angle
961	0	379	INTERACTION FARM/KIDDING YEAR	Rump Angle
962	0	380	INTERACTION FARM/KIDDING YEAR	Rump Angle
963	-0.882248	381	INTERACTION FARM/KIDDING YEAR	Rump Angle
964	-0.794318	382	INTERACTION FARM/KIDDING YEAR	Rump Angle
965	0	383	INTERACTION FARM/KIDDING YEAR	Rump Angle
966	-0.262267	384	INTERACTION FARM/KIDDING YEAR	Rump Angle
967	-0.490876	385	INTERACTION FARM/KIDDING YEAR	Rump Angle
968	0.977308	386	INTERACTION FARM/KIDDING YEAR	Rump Angle
969	0	387	INTERACTION FARM/KIDDING YEAR	Rump Angle
970	0.369377	388	INTERACTION FARM/KIDDING YEAR	Rump Angle
971	-0.374421	389	INTERACTION FARM/KIDDING YEAR	Rump Angle
972	0.0811461	390	INTERACTION FARM/KIDDING YEAR	Rump Angle
973	0	391	INTERACTION FARM/KIDDING YEAR	Rump Angle
974	-0.437618	393	INTERACTION FARM/KIDDING YEAR	Rump Angle
975	0	394	INTERACTION FARM/KIDDING YEAR	Rump Angle
976	0	395	INTERACTION FARM/KIDDING YEAR	Rump Angle
977	0	396	INTERACTION FARM/KIDDING YEAR	Rump Angle
978	-0.167645	397	INTERACTION FARM/KIDDING YEAR	Rump Angle
979	0	398	INTERACTION FARM/KIDDING YEAR	Rump Angle
980	-0.138881	399	INTERACTION FARM/KIDDING YEAR	Rump Angle
981	-0.952338	400	INTERACTION FARM/KIDDING YEAR	Rump Angle
982	-1.42302	401	INTERACTION FARM/KIDDING YEAR	Rump Angle
983	0.188498	402	INTERACTION FARM/KIDDING YEAR	Rump Angle
984	0	403	INTERACTION FARM/KIDDING YEAR	Rump Angle
985	-0.217353	404	INTERACTION FARM/KIDDING YEAR	Rump Angle
986	0	405	INTERACTION FARM/KIDDING YEAR	Rump Angle
1	0.25061	COVARIATE REGRESSION COEFFICIENT	AGE 1	Rump Width
2	-0.0375905	COVARIATE REGRESSION COEFFICIENT	AGE 2	Rump Width
3	0.002205	COVARIATE REGRESSION COEFFICIENT	DAYS IN MILK	Rump Width
4	0.392387	COVARIATE REGRESSION COEFFICIENT	AGE 1	Angulosity
5	-0.0498343	COVARIATE REGRESSION COEFFICIENT	AGE 2	Angulosity
6	0.00298344	COVARIATE REGRESSION COEFFICIENT	DAYS IN MILK	Angulosity
7	-0.143154	1	FARM	Rump Width
8	0.461063	2	FARM	Rump Width
9	0	3	FARM	Rump Width
10	0.691247	4	FARM	Rump Width
11	0.00066972	5	FARM	Rump Width
12	1.08363	6	FARM	Rump Width
13	0	7	FARM	Rump Width
14	-0.226865	8	FARM	Rump Width
15	0.409525	9	FARM	Rump Width
16	-0.215689	10	FARM	Rump Width
17	1.1157	13	FARM	Rump Width
18	0	14	FARM	Rump Width
19	-0.492859	15	FARM	Rump Width
20	0	16	FARM	Rump Width
21	0.523108	17	FARM	Rump Width
22	-0.0343914	18	FARM	Rump Width
23	0.0518491	19	FARM	Rump Width
24	0.87968	20	FARM	Rump Width
25	0.602334	21	FARM	Rump Width
26	0.130596	23	FARM	Rump Width
27	0.314345	24	FARM	Rump Width
[truncated: 132,097 more rows]
